# Supplementary material for: A computational investigation of kinetoplastid trans-splicing
Source: PubMed Central journal article supplement (PMC1297651; doi:10.1186/gb-2005-6-11-r95), 2005-10-17
Supplement: gb-2005-6-11-r95-S3.pdf [file gb-2005-6-11-r95-S3.pdf]

## Complete Data Sets

There were a total of three data sets used in this analysis. The first data set, consisting of sequences for training and testing the models, is included here. The sequence and splice site data for the *Leishmania* genes data set were derived from the GenBank entries for selected genes. The GenBank accession numbers for these genes are reported in Supplemental Data 2. The sequence and annotation data for chromosomes 1 and 3 of *Leishmania major* are publicly available from the Sanger Institute website [44].

### EST mapped data

The training data consist of 214 EST-mapped sequences with a splice site determined as described in Methods. For each of the sequences here, 400 nucleotides of upstream sequence are reported. In each instance, the splice site is at position 400 (end of sequence) in the reported sequence. As described in Methods, ten data sets of training and testing data were generated from these data by randomly partitioning 90% of the sequences into a training set and reserving 10% for testing.

The sequence identifiers indicate the chromosome from which the sequence derives and list the dbEST identifier for the EST which was used in that mapping. For example, the id

```
>lmaj_01_2 with EST W88316 10020, 10420
```

indicates that the sequence derives from Chromosome 1 of *L. major*, is the second such EST mapping on Chromosome 1 and that the mapping derives from EST id W88316. The two coordinates 10020 and 10420 indicate the beginning and end of the extracted sequence region with regard to the chromosomal sequence.

>lmaj\_04\_1\_up with W88315 10020, 10420  
GTCGGTCCCCGTTGCTGCTGGGGACAAGGTGCAGCGGGCGAATGAGCTTTCATGGTGCTCTGTGCAACAG  
CGTGTAGGTTAGGAGATGTTTCGGCCGTTTGTTCGTTTCGCATCCCGCTAGTCGAGCGCCGCGCGTCCG  
TGTTGACAAGACGTGAAGGGTGTGAACAGATACGCAGTGACATCCGCGGATGTTTTACGAGCGGAGATGC  
TGTTGCCCTCTTCTTTCGCTGCCGCTTACAGCCCTACTTTTTTCATGTTTTCCCTTGTTGTAGGGTGGCG  
TGTTCCCTGCATCGACGTCTCATCCCGCTTCTCTCATTGCGCTCTCCCTTTTTGCTTGAGCGTGTGCAAT  
CTCTGCTGTGCTATCATCACCTCTCCCGTACCCACTTCACCCTTTGACAG

>lmaj\_05\_1\_up with AA060765 413050, 413451  
AGGGAGGCTTTCCTGCCCCGACGACTGCACAGCCTTCTCTGCGTGACTACAACAACCTCGATCTCTCCTGCT  
CTTCCCGCCTCCCCCTCCGCCATCGCCTCACGCGCACCTGCACGTGTACACACAGTGGTACACGCTGCCG  
CACAAACTTCGCGCACGCACACCGGTGGTTGCACTATTCTGTGTGGCGTTCATGTCTTCTGCCCCGGC  
GTGATGCGTTATCACTGCGGCTTACCGCTCCTGTACTGCTTCCCGTCTTCTTGCCCGCAGGTGGTGGCG  
ACGCGCGGGACGGCAGCGACGGTGCATGGAGAACTTTTCCATCTTCTCTTCCCTGTTTCATCGGCGGCAT  
CGCCCTGGGGGCGGTTCATCATGCTGCCATCGCGTATCTCCGCTGGCAAG

>lmaj\_05\_2\_up with T93356 146697, 147098  
CACCCCGGATTCCAGAAAAGTTCGCGCGGACACGGAAGCGTTTCCGCCCCAGGGGCGCTTACGCGTGA  
GTCCCACTGCGTGTGCAAAGCGTTTTTTTTGTACCGTTTTTCATCCTTACTCCTATTTTTTCGCTGAAAAAGG  
GTGTCGGTGGCGAATTCTTGCAAAAACCGCTCTCTGCTACGCGACTCGAATTATGACAAGCGAAACACA  
TCGCCTCTTGAGAGCGTCTGGCTAGTGGAGGAGCACACAAGTTCCCTCCACTGCCTTTGTTGTCATGAC  
TTTCTCACGCATCAGGCGTCGACAGACATTTGCTTCTCCACTCCCACTCACTTGCCCTCTTACTTCCCTGAC  
CTCTTGCTTTTCTTTCGATCTGCACTGTGTTACCAATTGTACACGAAAAG

>lmaj\_05\_3\_up with W88316 82981, 83381  
GGTGTGTGCCCCGCGCTGTAACCCTCACAGATTTCAATCTGGTGTGCCTTGTGCTCCTCTGGCTCAAA  
GACGAACACGTGGCCTGAAACTATTTGTTTTCTGTTGTTGTACCCAGTGAGGCACCATTTCGTGCAACAC  
ATTGCTTTCGCGGTACCTGTAACCTTATCGGTTGCTTTCCCTGAAAAAGCGCTGTTACACTTTGCGATG  
AATAGGGCTAAGCATAAATTCACGTATGTGATGTGGCTTATTCCCTCACAGTGGTTTTCATTTCCACACAA  
AAGATAACACCGTGGCATCCCGATTACTGCTCTTCTCTAGCATTCTCCCATTCCTCTCCCTTTCTTT  
GCCATACTGCTTCTTTCATAACTCCGCTGATTTCCAAACAAAAGGTGTAG

>lmaj\_06\_1\_up with T67346 256151, 256551  
TCCGTAACACGTCCACCTGTTACATCCGCACTCTTCGCCGGTGGCGCCCGACACACACACACACTT  
AGTGATGGCTCAAGCAGGACGTGACGGGTGGTACACAAGCAGAGAAGGGCGCTTGCGCACTCGCGCGGGT  
GTGCATCTGCCGACATGTGCACTATCATACGCTCTTGTCTCTCTGCTACGACGCACACCAGGCGGAGCT  
GCCCTCTTTACCCATCTTCCCCCTCCGCCGACCTTTGCCTCTCACGCGCGCACGCCCTCACCATCTC  
CTCTCAACCGCTCCTCGTGCTTGTCTTTGGGCCCTCCATCTCCCTCCCTCCCTCCATCTCCCTCCCT  
CCCTCCATCTCCCTCCCTCCCTCCCACTGGCTCGCATGTGTGCGTGAG

>lmaj\_06\_3\_up with W88361 131478, 131878  
ATTATGAAATATCAATGGAGTCTCCACCGCGGCAGACGTTACTTCCACCCAACCTCCGGTTTCTTCATG  
GTGGGCGATGAGTGTAACCGTCGTGTGTTGCTGCGTGATAATAGTTGCAGCTTTGTAAACGAGCAGACCG  
CTTGTACAAAAGAACAATACTATTATAGCAGTTGCTCCCTTTCTCCTGCGACCACTTTCAAACAGA  
TGTGACGGAAAGTAAAAGTGCACACAGTGTGTTGTCATCGCAGCTCTACAAAGAGCAATCTTTTTTTG  
TGTTGGAATGCACACACTTCTCAACTCCCCACTTGCAAGCCTTTCTCAATTCCCATTTACGTCTTTTTTT  
TTTCTTGCCCTCTCTTTCCACACTACTCTAAATCTCCACATCGAATGTAG

>lmaj\_06\_4\_up with T67367 132057, 132457  
TGTGACCATTGGCTTACTCGTAGCCGTTTCGGCTCGAGTATGAAACTGGAGACTGTTTTGTGCAAGCACC  
CCACCTTTTTGGGGAAGGCTGCCTGCACTCACGCACTAGCATCCTTACTCTCTCCCTAGTGAAGTGTGCC



TCTCCCTCTCACCTGACGCGGCACGTGTCCATGCCGCTCATTCCCTTAG  
>lmaj\_09\_5\_up with T67301 30777, 31177  
AGGTGCCTCAGGATACCGCCGGCGGGTGGCTGGTGGGAAGAGAGACCGACGAGGCATTGCTCTCGCTTTC  
CTCTCACCCACGCTTCTCGCTCCGCTCTGCAGTGAACCCTCGATGCCGAGCGAAGTGTGCTTCTTACTGTT  
CCTGATCAGCAACCGCGTTTGCAGGTGCTGTGAGACCCTTGCAGGCGCACCTGCAGGCACTGCCTGTCA  
CCTCCTGACGACCTGAACCTCGCACTTGCCTTTATCGCTTGCCTTCTCCCGCGTGGGGTCTGCGCTGCAA  
CAGAATGGAGTCGCTGCCATTGTGCAACGCGCCCGTCTCGCCCCATCTCACCCACCCACTCTTCTCTCT  
CTGTCCCTTCTCTCTCCATGTTGTGCGTGTGTGCTGCCTTCCCTTCTTTAG  
>lmaj\_10\_2\_up with W88356 37897, 38297  
GCATCACAGGGGATCTGCAAGGAGATGAATCGTATGGCTATGCTTTTTTCTGCATTCGAATTCGCCGAAT  
ATCTGTTTTCACACTCGCGATAATGCCATGATCTGGGTAACCTCATCTAGTCTTGCTTACCTTGCTGTTT  
TGATTTTCGTTGAGTTTTCGCGTGCATACTTTCAGTTGCGAATGAACAAGCAAGAAGAAGTCCGAAACACCC  
GTTGAAGTTTGACCACGTGGTGTGTCGATCGCCTTTGTGTTCTGGGAGAACAGAAAGCCTGCTCTGTGGC  
TCCACGCCACGGCAAAATGCCAAAATACGGAGTCTGTGCATGTGTGCCTTTGTTGTGTTTCATTCAATTTCTA  
TCATTTTATCCTGCGTTTTTTCGGTGTGTTGCTTTCATACCTCCCTTTAAG  
>lmaj\_10\_3\_up with W88366 534400, 534801  
AGAAAATCAGATTCATGAATCTTCTCAGTATGCGACCATCGGGCTCCTAGTGTTAAAAAATTGGTAAACCT  
ATCGAAATGTCGACGAAGAGCCGATCCTTTTCGGCGAAGAAAAAGAACTCTGTTGTTTCAGCACCTGGAATG  
CACTCAAGCTACTATACTGAAAGAAAGGCTCCATGCTGCCTTCCAGCAGCCCTGCTTCCGCGAATCTAGC  
CGTTTTTCACACCCAGGGAGAGTTTTTGGTAAAAATTTTCAATTTCTGGTCTTCTCTGAGAGTTTTCCCTC  
ATTCCGAGCTCTGGTCTTCTCTCTTTTTTCTTTTGCTTCGCTTTACTCCTCTGTTCTTCTGCATACAA  
CGGACCTACACATCTACCATTAATTCAAAATACTCCCGCATTTCATGCAAG  
>lmaj\_10\_4\_up with AA125640 76645, 77046  
AGTTCTTCCCTCCACACACACAGACACACACTTTTTGCCTGTCTGCCACGACTATGGATCACCTGTGAC  
TGACGGAAAAAGGGAGGGGTGCGCGCCTCTACCTACTCGGGTGTAGTGCTGTTTCGAGGTAGCAAGTGTA  
GGGATGTCCGATCGGTATGCGCGTCCACGGAAATGGAAACTCGCCAGCCTTGATGCGTTGGAATGATCT  
CTTTTCGACCACGTCAGGCACATATTTTGCACATCACACACACTCTGCGTCTCCCCTGCTTCTATTATTT  
TCCCTTTTGTGTCGACACGATGTGCGGGCTTGTGAGTGTGGCCTGCGCACGTGGGCCGTGTTCTCGGTT  
CTCCTCTCTTTCGCTGTCTGTATCGGTCTGCCATGCCGCTGCTCAG  
>lmaj\_10\_6\_up with W88345 551867, 552267  
TCGCGCATTTC AACAGAAGCGAGTGACCCTGATGCGCCAGATCCATTCACTGGAGAGCCGAGAAGACTTA  
CAAGACCTCTCTGATCAAAGCATGCCAGCTTAGATATGACGTGTTGTGCAACGGCACACCTCAAGCCGTG  
CAGTTTTCGCGAGAAACAAGGTGAGCCATTTGCATTACGCACTGTCCGCCACCAACTCCGAACAACCTCGC  
GCTCCTTACTGGCAACCCCTTGTACTTTCTCCTGCCACCCAGTCTCAACGTACGCTAGCAACTCCTCAGA  
AAGACGAGAAGTCCGTACTGTGATAGTCTGTCTAGGCGCTTTCGAACAGTATCAGCGCTGGGTGTTCCCT  
GTAGATGCCCCCTAGTCCATATAATCTTGTCTTTTTTTTTTTTGGCTTCAG  
>lmaj\_10\_7\_up with T93381 113359, 113759  
CTGGGCCCTGAGGATGCGACGCGGAGGGTTGAGTGTCTGCCCCCTTACAGGAACACTGAGCGTTGAA  
CACAGAAAGACATGTTGCCTGCGATAGCAGACGGCACCCGTTGAAGCGCAGCGACAATGTTTCACGGGTGG  
TGGAGCTGCGCGCGTGCAGGGAGGGTGGCCCCGATGCAGGCGGCGATGACGTACGTGAAAAGCACGGG  
GACTGCGCAGCCACCCCTTTTTCGGAGTCTCCCTGAGCCGCTGGCGGTGGCGCCCCCTCCCCCTCCCCC  
TCTCCCTCCCTCACGCATCCGTGTGATGGTGTGTTATGTAAGCAGAAAAAGGGCGCCACGCTCGTTCTT  
CTGCCGCGGTGTGCAAAATCCCCCACCCTCCCTCTCTACTCCTTCCAAG  
>lmaj\_10\_8\_up with AA060734 39114, 39514  
CATAGGCACTCTGTGGCCAGACGACCTTGTCTACTATTTTATGACTCCTTCTTCGTTGCTTTGGAGATGA

TGCGAGCTCAACAAAGACAATTACGTGCTTTCACTCTATTGAAGAGCGTCGCGCCGTGGGGCGTATATGG  
TTTTGCGTCATCGCCAAGAACTCTCAGCAGACGAAGAAAAAAGGCACCTTCTGTGATGGCAAAGATGC  
AGTGCGTTAGGCTCTATCATCCTCTGTATTTTCTTCATGACAGTTTTTTGTATATCCCTGTATTGAAGCT  
CGAACGGGAGCCGAGGCATCACTGGGATTACCTGCTTAGGAAAAGGTTGCATCTCTGGTGTTTTTTTTT  
ACATCCAATCGAGTAGCGCTCTCATCTGTCCCGTTTTCTCTCTCTCCAG

>lmaj\_12\_2\_up with AA125638 378230, 378630

GTGTGTGTGCGTGTGTATGTGTGTGTGTGTGTGTGTGCGTGTGCGTGTGTGTGTGTGTGTGCGTGTGTAT  
GTGTGTGTGTGCGTGTGTGTGTGTGTGCGTGTGTGTGTGTGTGTGTGTGCGGTGTTTCTGCATCCCCGAT  
GACGTGCAGACACGCGCTTCTTGATTTTTGTTGTCCTCGTCAAACAAAAGGCCGGCGCATGGCAGTCTA  
CACTTCCAACCTACGCAAGTCTGCTTCTTCCTGACCCTCCCTCTCTATCCACACATACTTCCATACGCA  
CTCGGCATCTCGGCTCCCCACTACGCCGCTCGCTCGGTCTCCTCTGCGGCTGCGGCGCTGATGTGATGC  
TCGCTGGTTTTCTTTGTTCTTGACCATCCGATCGGACTTTTTCTCCGAAG

>lmaj\_13\_1\_up with W88319 183240, 183641

GAGAAGGAGGGGCGGCCGGGCCGCGGACACAAATGTGCAGGCGTGTGTGCGGCGTGCCTCCTCTTCCG  
TCCCCTCCCGCTCTGCTTCTCCTGCCCTGTGCCCCCTTCTACTTCCCTCCGCACGGCCCTGCATTTAC  
TTCGACGTCCAGCACACCGACACCAGACCCGACGCCCGCGGTGCGCAGCTGTGCAGTCTCTTTGTTT  
CCTTCGCCGCTAATAACCAACGTGCGTGTGTTTTCTGAATCCGTCTCCGCTGCTAATACTACTGCTACCTCGC  
TCCTCTCCCCACCGCTACGTCTCCTCTTCTTTTTCCATATGCTGGGCGCATGTCTACTCTTGCCACAC  
ACACACACACACACACACACACATGCACGTCTTAACATGTACAG

>lmaj\_13\_4\_up with W88394 176336, 176737

ATAAGACAACCGCTTGTAAGGCGGAACATACCTGCCTGCCTGTGTGTGCGTGTGTGCGGGCTGTATCAG  
CTGCGTATCTTTCTCTCTCGCTGCGAATAGAAGGCGGCCAAACCAAGTGAAGTGAAGGCCGTGAGGCGT  
CGCTCTGCTCGAGAGTGGCTGACCATTTTGTAAACGCAGTCGTGCGGTTGCTCGCCAAACACACTGTGTG  
TGCTCACTCTCCCTTCCACCCCCCCCCCCCCGCTCGCTCCGTCACGGTCAATGCGCGTGGACTTGT  
GCGGGGTTGACCTCTGATCTACACGCTCTCATCCCTCTCCTTGCTGGCCTCCTTTCTCTCTCACGTGCAC  
ACGCGCCCGTGTATACACACAAACCTGCACGGCTCAACGGCTCGGCGCAG

>lmaj\_13\_5\_up with T67341 147624, 148025

GGGAAATGCCTGGTTATATATGTATATATATATCTATATATGTGGCATGGTATTGTCAGAAT  
AAGCAATTTTGGAGACTTTTTGGAGGTGGAGCGCTAATTTGGTCACTGAGTAGCAAAAACAACAAAAG  
TCACGATTTCTGTAAGGCGAAGAAATACTTTTAGTTGAAAAGTCTTCCAACGGTCGAAATAAAAGTCTT  
ACTTGAGCTGCGGAGTCGCATTCGCCCTTTCTCATAAGATTTCTCCTGAAACTGATTTTTTCAGGAAAA  
ATATGGATGGATGCTTGGCCTACTAAGCCTTTGAGTTTCATCATAATCATTGTTTCTCCCATAGACCTT  
CGAAACCCCTTTTCCCCTACTCACTCACTCTTAGCTTTTTTTTTTACAG

>lmaj\_13\_6\_up with T67348 511787, 512187

CGCGTGTGTACGATGCAACTCTATGTGGTGTACACTGTGAGTACGGCTGAAAACCTGAAAGCAGTACT  
CTTTTTCGCAAGTATCTGGGTATTGTGACACAGCGCTGAATACTATGCTGTTCTTTTCCCGGAGTCAAAG  
CGAAGTGTCAAAAACAGGGTGACAACAGGCCCTTTGGACAGGGTTTTTACGGTCCGCTGGTGTCCACATCT  
TCAACGTCCCCTATCGAATGCGTTGTGCCGCTGTTACAGGAATTGCTGCTTCGAAAAACCTCCGGAAT  
ATTTTCATCCTCTTTCGCGGTATCGTGTATGGGTAATGCGGAGATGAAGACTCGCATTGACTATTTACTGCT  
CTCTTTATCATCTCTTTTCTCACTCCTCTCATTTCCCTTTTTCCACACAG

>lmaj\_14\_1\_up with T93389 201804, 202204

ATACAACCACCCACAACTTGCACACGCTCGCGGAAGGGAGGGAAAAGAAAGGGGAAGGGAAGCGTCCC  
GGATGCGCGAAGCTGTGGCGCAACGATACCTGAGCACCATGTGCGCAGCACGGGAGGAGGAGGAGAT  
CAGTTGTTACCGTGGGCGGTATGAGCGAGAACCCCAACAAACCACGGCAGCCAAAAGCGCACAAAGAGTGA  
CGACACAAATCGAAAGCCGTAGGCATGGGGCCACACACCCTTACTGCTGTTGCTGTTGCTTCCGCGT



CCGTGTACTGTAGCCGCGAGAGGACTTCTGCGACGACTTTCGCTCTGCAAGCGCTCTAGTGCGGCCATGT  
TGGTGCAGTGCATCGCCTTTCTCATAGTGGATGTCGTTACATCGTTGGTCACTCAGGGCATGTGCGGCT  
GAGAAGGGTGAAGCCTGTGTGCGACAGCGCCGTTCCGGTCAACGTGCAGCGTGAGGGGAGTCAGACACGT  
GCCGCCCCGAGCTCTGTTGGTGGTCCGTGTGCGCCTGCCTCCTCTCGCGAGGGCATTTC AACCCACGCCG  
CCGGGTCTTTCTGCTCCACTGCCATTTTTCTTGTGCGCGTATCTCTGTTTTACGACGGTTCACGCTCTCT  
GCCGACCACACGCCTACTACTCCACCTCGTTGGGTGCGTTCTTACTACTAG

>lmaj\_16\_2\_up with AA125650 345011, 345412

GTTGGAGCAATCTGCTAGTACACAGAAGGCCGACCAGGAATCCCCAATCTTACTGTGCCTACCCATAACC  
CTTCTCAAAGGGAATCGAAATTC AAGGGAAAGAGGAGGTGAACGAGCAATACGAAGATGCTGTACCTG  
CTCGTCAGTATGCTTAGTAAGCTACCCAGCTCTTGTTTTTCAAGAAGCTACTCTGGATTAATATTGCGTGT  
AGATGCAACAGGGAAACAAAACAAAGTCAAAGCTCGCTGCTCACCATGGGAAAGCCGTGGTATGAATTC A  
ATTCCGCTCTCGGAAAGGTGAGAGTCATGTTCTCAGCGCTACCGATTGCGCGTATGTGCACCTCTTGAT  
TTTTCTTCTATCTTTCTTTCCCGCTTCCTTCTTTCTACTCTGCAACGAAG

>lmaj\_16\_3\_up with W88267 129430, 129830

GTGGTTAACGGGCGCCGGGCACCCGCTCGAGAGAGCGCATGGCAAGGGCTGCGTTGCGCGCCTTCTCTGTT  
TCTCTCCCCGCCCTACGCCAGCTGCACCTCTCCCCTCCGCCCTCCTTCCGCGTCCGCCCTTTACAGA  
GCCCGGGACTTGATCATAGTGTGCAGTGCATCAGAAGGGCAGCCCCCATCTGACTAGGGACAACAGCGGT  
ACGCGGCTCTCGCCCCTCCGCCCGCGTACTTCCGATCTCCCAACCCCCACCCCCCTAACCGGCATTC  
ACCGGAGCGCATGCGCGTCTTTGCTTCATCACACACAGCGGGCGCCGACCACTCCCCTTTGCTCTCTCT  
CTCTTCCCTCCCTCCCTCCCTCATGCGCTGCTGCACTGCCCCACACGCAG

>lmaj\_16\_4\_up with T93442 344051, 344452

TTTCTGCAGAGGGTGGTTCGCTGCGAAGTAGGTCGCTTGTGTATGTTCCACGCTGAAGGGGAGGGTGAG  
CGGGTGCCGGGATGGCGTCAGGTATGAATCGTGGCGGGCTTACTCTCAGAGTCCCATCTCGCTGGGTG  
GAGGGTGTATGCAACCAGCGTCGCTGGAGGGTCATGCCTGAGAACTTTTAGAAGTCGCAACACGAAAGTG  
CTAGTGGAGCCCCAAGACAGGCTCAGCTAGGACTGCTTTACAACCGGTAAGTATTTGCAGGACATTGC  
AGCAGCTGATAAAGCTCGCACTTCGTCTTGGCTGGAAACTGGCCACCTACGTTTGCAGCTCCGCTTGAC  
GATCGTTATGCTTTTCTCCTCCGTCTGTTTAATCTTCTCTCTTTGACG

>lmaj\_16\_5\_up with W88299 345653, 346054

TTGGACCTTCTGGCATTGCGTTATTGGAGAGGGATTTCGATTTGAGATCACCTATGAGGTGAAGCACCT  
GATGTACATGTTCCACAGGGTTTCATTGCTATTGTTGTGTTCAAGGGCCTCTAAGGTGGTGTATATAGC  
ACTTTGACTTCTCATGTATACAGCTTTACGGAGGAAACGCAAGAAATTGAGCTGCTATCTCAGCGAGCCA  
CGGCTACAATGACGTGGTTTATCTGCGCAGGTGCGAATCCTCAGCGCAAAAGGTGTCAGAGATATCATGG  
ATGACAACTTGTCTCCTTTGATTTGCCAGTGCTTTCTCTATGTGTGTGTGTGTCGAGCGGAGTATTC  
GTGAGGCTATGCCGTCATTGTGCCCCCACTCTCTCTTGTGAGCGAAAG

>lmaj\_16\_6\_up with T67305 421595, 421996

CATCTTCGCGCGCGTGGTGGCTTCTGTTTCTGTATCTGTATGCCGGTATTTGCCTAGAAGCAAAGA  
ACGCGAGCGACACGGAGACCAACACACATGCTCCATCATCTACAGTATGGGCAAGAGGAGGCGTGCA  
TGAGTCCCTCCCCCTCGTAGCGACGCACACAGGTGTACGCTTCTCTGACTCTCTCTCTCTCTCTCTCT  
CGTGCCTGTGTATGTGTCCGTGTGCGCGCACCATCGGACTCTGCGAAGGGGCAGCGTAATCGACTATCGT  
GAGCCCCACCCCGCACTTCACTCACATCATGCACGGTTGCCCACTCTGTCTTCCCTTTTCCCTATGCTC  
TTCTCTGCGCCTCTTGCTGGATCTGTGCGTATTCCGACTACCTCCATAAG

>lmaj\_17\_1\_up with W88350 665430, 665830

TCGTA CTCAAGCGCAGCCACACATTGATGTGACAATGACAAACAGTTGAATAAAGTTAAAGTCCATACGA  
GGGGTTCGTGCATGTGGACATGCTCGTGCTTACCGCACCGCAGGGTCTCTCATGCAGGTCTTGTGAGAGAT  
GGAAACTTGTATCTTTTTGACTACGGCGCGCTTATGTGAGCGCCTGCGGTTTTACGGTGTCACTGTAC

CGCACAGGGACCTCGCCAAGAGTACACCCGTCACCGTACTCCACCTGTGTCTAATGCGATTAGGCTTTCA  
TGCCCTCGCTATCTGTCCCTCTTTGTCACTACTAACCTTCTCCCATGCGTCACTCTCCGCTTCGTGGCT  
TGCTGTGTTTTCGAGGTGCTCTCCGAATTTGGCGGTTGACACGGCCAG  
>lmaj\_18\_1\_up with T97244 376204, 376605  
CGCTCAACTAAAAGCGCGTTGTGTGCGTGTGCGTGTGATCACGTCAGTATTGCCTGAGTCGATATGCG  
ATGCTGCTGGCCGCGGTGTGTCCGACGACGCCGTGTGCGCTCTCGGCTGTGCGACACAGGCGAATGAC  
TGTAACACATGCGGGGGCACCTCTCACGCAAAAAGAAGTCAACCCACGAAGAGGGCAGCGGCCACCGACA  
CAATCAGACGTTGCGGTGCCGTCTCACGCAGCCTCCGTTCCACCTCATGAATGCGCGAGAGCGGCGCT  
GCTCGTCTTGCTCTGTTGCTGTTGCGTTCATGCTGTGATGTTCTCCCCGCTGTACCGGATCTCCG  
TCTCACCCACACCCTCCCCTCTGTGTGCTTGATTGACCCCGGTTGACG  
>lmaj\_18\_2\_up with W88272 691016, 691417  
TCAGTACGCCTCGTAGCAGCGGTTGCACCACTCATTAGCGACAGGGAAGTGATAAGGGCGAGGGGTGTGA  
AACGTGACTTTGTTTGTGGCTTTACCCACACGCTGAATGCTGGGGTGAGCGAGAGAGGTAGCGCGACCT  
ACGCGCTCTGTGTTAGCCTTTCCCTATTGCGTCTGCTCTTGTCTGCAACTCGCCATGACCACAACGAACGC  
TTCACCAGAAGGGCAGAGCGGAGGAAGGATGCTGCAGGATGGCGAAGAAGTAATCATCGCAGGGGCCGCA  
GCCCTGCTCCAACAGGTCATCTTTAGGTGCCTCATGTGGGCACGTACACACATAACGCATCGCTCTTCCA  
CGAGCCCTCCCTCTCTTCCCTCCCTCTTCGGCTTGTTCCTCGATCGCCTAG  
>lmaj\_18\_5\_up with AA125622 326670, 327071  
CCTCTCTCTTTTGTGTGTGTGTGTGTGTGTCTCACAGTCGGTCGAGTGGCCGGCACCGGTTCTCGTC  
ACGGCAGCTGCCTGCCCTTAAGCGCTCTTCCGCATCGCTCACCTCACCTCCTAGCTCCGCACTCGTCGTC  
TTACACGCGTGAGGAAGAAGAGAGGAGCCACCACCGACATAACCACTGAGGTCCTTGATGCGTCTCTCC  
CGTGTTTGACGCTGTTGTTGTTGCCGCTCACCTAAATTGTGCCTCATCCCTCCCTCTCCTGTGCGACCG  
CCTTGTGCGGTGGGCTGCCATCGACGCCGTGGGTTTTCACTCGCCCCCCCCCTCCCGACCCTTCGCTCAC  
GCACGCACACTTAAACGCATGCGGGCAAGCGCTGACAACCACGAGCGCAG  
>lmaj\_18\_6\_up with T67390 672428, 672829  
CGCGAAAGGGCAATGCAGGCGTCGTGTTTGTGGTGCAGAGGCGAGGACCCAGTTCACCGGGCACGCTCG  
CGTCTGCCTACCTGGAGACGTGGCCCTGCGTATCGTGCATCCTCGGATGGCTTGATGGAGCACGAATTCC  
GTAGCCGGAACGATGAAGGTGGGTGCACGACCTACTGAACGATTGCTTCCCTCATGTGCGCTGACGAGGGA  
GACGCCAACACACGCGCTCTGCCTGTGTTGGCGTGCAGACACAGTTTCATGAAGACTGTGTTGCGGCAC  
CAAATATTTTGTGAGGCCCTGCCCTATCCGGTGGTGAAGTGGCGTGACCTCGCTCTGCTCCTCTTCGCC  
TTCTCATCTGCGTTGTATAACCCCTGTCCCTCTCTTTTCTGCACGAAG  
>lmaj\_18\_7\_up with T93360 424682, 425083  
ACACAGGCCACGCGTGCCCCAGTGCAAGCGGTCAAGCGTGCCATCCAGCCGCTGATGCAGCCTGGACG  
GAAGTTGCGGCATATAACCACGCTGGTCAAGAGGAAACCAAGCAGATCCATCTGCGCCTGTCCGTACACGC  
GGTGTGCACTTGGCGCGCTGCTAAGGTGTGCTTGGGTCTGGCGCGCGGGGGAGGGGGCAAGAA  
AGGAAAGGGCGATGAAGTGCTGAGCGAAGCCGAGTGCACATCTCTTCCGCTCTCCCTCTCACTCTAT  
ATCCGTCTTTCTCAACATCTGTCACGCATGGCATATGCGCCTCTCGCTGGACACCACCTCCAACCTTCT  
CCTCCTTCGCTGGGACTTCTGTTGCATGTGATCGTCATGCATCTGTTGAG  
>lmaj\_18\_8\_up with T93417 705875, 706276  
GCTCCCTTGATAACCCTCACACCCGGGAGCTTCGTACGCCTCTCTCCCTTACACACTCCAGACGGCAGTAG  
ACGCGCCAGTGACGCCCGCTGAATGACCGAAGCGCGTGTGTTGCGTGGTGTCCCTCGCACCGTGCACACTG  
GGTGTGTCGCTGGCGCCCTCTCCAGTGTGTAAGTGCCTCTCGCACGCGCTAAAACCTCTGTAGCTGC  
GCGTTTTATTAGCCAAGACGGTGGCGGTGCTCGCCACAATCATGCCAAGGAGAGCGCTTGGCGTTATTATG  
TCGCCCTAACCTCTTTTCATCCCGTATCCGCTTCTCGACGGCCGCCCTCTCCCTCCCTCCCGCT  
GCGTTGTCTGTTTCTGCGCCGATGTGCTTATGGTGTGGTTCGCGGAAG



```

>lmaj_18_9_up with AA060779 724632, 725033
AGCGAAAAGGAGAGAGCCCTCGGATGTACAGTTTTTCTCCACGCCATGCCCTTGCAATCTCGACTGTAGA
TACCCCTTTGTGCTATAACATGCTGTGGCACTCATGGGCTCGAGTGAGTCCCTGCGCCGTGGGTTGCCGA
CACCGGTAACAACACTACCCACTCGCTCTTACAGAGTGCTGCTCCCACCCCTCCCATCGTTCATCAT
GACCCTGCATCCATTATATCGACTCTCGCGTCACTCTGTTGTGGCCACATGCGCTGCACTCCACTCTCTG
CTATCCCTTTTACCTGCTCGCTATTTGCTCATCTTCACTGCTCACCACCCGCGCGGCCGCACACATGCAC
ATGCTCATTACGCATACACGAGACCTCCTGCAACGCGTTCACTATCAAG
>lmaj_19_2_up with T67351 528513, 528913
GCGCACTGCAACTCGCGGGTTCGTCTCGTCAAGAGTTACGGCTCTTTGCTTCCTTCTTTGGTTGCCAAC
ACCCCGCTCATGAAGAACGCTGAAGCGCCCTTTGGGTGGAGAGGAGAGAGGAGGAGGACTATACCG
ACTCCTGCGCGCTACAGCGGAAGCCCTTTTTCGCTCCTGTGCCCGCACGCGCACGCGTCTGCGGGC
ATGATGTGGCGGACCCTGATTTTTCTCGCGTTTCTGCCGTGCGCTGCTTCTCCATCGATCACCACCACCA
CCACCGCCACCGCCACCGCCCTTCCCTGCCTTTTATTCTGCCACCATTGGCTCTCTCGCTCGATCAC
ACTTTTCTCCTCAGACTACCGCAACCCTTACCGCCCGTGCACCCCGCAG
>lmaj_19_3_up with W88352 333552, 333952
CAAAAATGGGAGTCGACTGTTGGCGTTGCAACGCCAAGACCAACTCTCACATTTGAGGCGTGTCTTCTT
CCCTCAGAGGCCAGAAGAGGAGATGCGGAGAGCACGTTGTGTCACTAGATGTATTACGGCCTCTGCC
ATGAAGGCTTTTCAAGAGGAAGGAGCATGCTCGCAGCAGCTTTGCATCCACGCACGCACACGAGAGAC
CTTCTCCTCCTCGAGTTGTATTCTGTTTCTGCCCTTGACCCGCTCCTTCCCTCTTCACTTCTCCTAT
TCTGTTGCTTCCCTTGCCACACACACACACACACGACACGCACACGCACACGCACGCTCCCACCCGG
CCCTCTCTTTCTTGATGCGTGCCTCGTTACTTTGGTCAACGCGCAAG
>lmaj_19_4_up with T93399 395172, 395572
ATAAAACGAATCCCTATTTGCCATTTCCGCAAGACGCAGCAGCGACTGACCTGAACTGTGTGGCATGGAT
ATTACAAGCAATAGTGAAGCTTTTTTTATTTTGGCAGTACAGAACAGAAATCGGCACATAATGTTTGTCA
CTTACTGCGCATAAGCAGAAGCTTACTTATTCGTAGACTGCTCACTACCAGACTGCTAGTGCATAATCCT
CCGAGAGTTTGAACCTCGCTACTTCTAGCCTCCAAGACCACGCGCAGATCTAGAGTCGCGGAGTGGGTTT
ACTACGCAGCTGTTGCTGAACCAACCCAGGGCTCTTCTCCCTCAGCAGGCTTTGACTTTCTCATATTTTC
GCTTCTCCTCACTTCCCGCTCCATGCTTACCATTGTGCCAAACAAAAAAG
>lmaj_19_5_up with AA125613 640070, 640471
TGAAGTGAAGCACCGATGAGTACATGTATGTATACATGTTCTGTGCGGTGCTAAAGTAGAGAAAATAGAC
AAGCGAAAACGCCATTGTATAACCTTCATGGCTTTTAATCCCTGCCCTCTGCGCGTGCATCACAAGGGT
TGCAAAGCCCCTTTTTTGCTTATAAGCTGATGTGGCCAAAAAAAATCAAGCGATTGCTTGTGTATGT
TCCAGAGCACTATGTTGAGTACTAAAACAAGCTACTATGCGTTTGTACCAACATCTTTCGCTGTTTCTG
TTCGCTATGTACAGGACAAGCGATACGCTGATGTATTATCATCGTGTTCATTCTCATAACAGTATGAT
ACTCTCCGCCCTCACCTATCCTCGTGTCTTTTCAATTTATTATGGGTCAAG
>lmaj_19_6_up with AA060759 646367, 646768
CGTGCCACTGTATCTGCTACAGTGTTCATAGATGTGGTGTGGAGCCGGGAAGATGCGAGCAACGCGCAGC
CACTCGGTCTCTTGATTATGGGGGAGGTGTGTCCATGCCGTGAGTCCGCATGGCGTGCCTACGCC
CGCTGAACTGGTGAAGCGCTCTGCCCTCCAGTTGCAGTACCCCCCTTGAACCCCTGAACTTTACCATC
GCCGTCTCTCGTTCGTTGGCTGGAACGCACGAAAATGGAGTAGGCCATGAGATATTCTCATCCCTCCCC
CTCTTCGATTGCGAAAATGTGCGCATGGCATGATGCGTTGAACACTTCCAAGGCTTCTCGTCTTGCCCCAC
ACTCTTCTCTTCGTGCTTTTTTTGTATGCCGAAATCGTGTGCATCAAAG
>lmaj_19_7_up with T93377 531794, 532194
ATGGCGTCTTGTGCATCCACGTGCGCCGCCACCGACCCACCCACCAGAATATCGTGCGGGCCGACGTG
GGATAGCAGTAGCCTTGAGGGCGCGTTGGTAGTGGATGATCGAAACCGTTGCAGCAGCGGCCATCATCC

```

ACGGATAAGGGTGAGGGGAAGTAAATCACAGGGGTCGCGGGAGAGACAACAGCCGTTCTTTCATCTCTCG  
TCCTTCCAACCCCGCCAAACACCCACGATCACGCTCGCATGCTGCTGAGTTGTCTTTCTGCTTCGCTT  
GTTGTGCCTCTTACCGTCTCTTCTGGTTTTTCGGCCCTCGCACCCACTCACTTCCGTCCACCCTGGGCAC  
ACGCCCCGCGGATCGCGCTTGAATGCATCGCCAACGACACCACCGCTAG

>lmaj\_19\_8\_up with W88292 408705, 409105

GTATATCTGTGTGTCTTCGTCAGTGGGAAGCTCCCCCCCCTCTCATGCATGCCGACATGCCCCGGCATCC  
TTCACTCCCCCTCCCCTCCTACTCCTTTCCACACCTGCCCTTCTCACTTTACCTGTTTTGTGTTTTCTG  
TTTTCTCCTGTGCTGACTATCCGACTCTCTATCTCCCCCCCCAAACACACACACACACATACGCACGC  
ACACGCAACTCTCTCTCTCTCTCTCGTTGCTCTCCGTATGTCACGTGTGGCTGTCCCTTTGGTGGGGT  
GTGCGCCTTCAATTGGTTTTCTGTACTCTTTTTTTCTGCTCGGGTGTGTTTCGTGTGGTCCCTTCTCTCACACC  
CTCACATCCTTTGAGTCAAACACGTCCCTCTTCCCCCTCCTGTGCAAG

>lmaj\_20\_1\_up with W88320 29676, 30076

ACTGACGTACACTACAAGTCGTTCCGTTTTCGTTACTGTCTCTCCCCTCGGGTGTATATGCCTGTGTGCC  
AGTCTCTCGTCCCCACTCCACCCCTCCTCCCCTGTCTTTGCCCTGCTCACGTAAGTGGGACCACACGAA  
TGCGCGTATTTGTGCGTGTGCTGGTGTGTTGTTGACGCGCATCAACGACATGAAGAGAGAGATGGGCCGA  
TCGAAACGCTACGAACCTCTCGTCGATGCAGCCGTGTGGGAGTTTCGTGAGGAAGCGCGGGGATCAGCTT  
TGTGTCTGTGTGACCTCTAACACCCCGTCACTGCCCCCTCATCGCCATGATCGGCTGATGCGCCTCAGA  
GCCTTCCATTCGTCCCTCCCTCTTCGGCCTCCTCAATCCTGTCTTGTGACG

>lmaj\_20\_3\_up with T93364 112531, 112932

AGAGATGCTCACATCAAGGGCGGCGCCTCGCCGCCAGTGTGTTCCATCTGTGTGTAGGGCTTTC  
GCGCCGTGCGCATGTCTTAGGCACCTTGTGCGCTTCGCGTTACTCCCTGTCGAGGAAACGCTGGGGCG  
AGTGTGAGGAGCGAGGACGGATGCATCGGCGAAGTCTCACCGATGTCCAAAATCGAAGCACTTGTGGATG  
TCGAGCTCTCTCCTCCTCCGTGCCCCCTTCACTCTTTGCGTCTTTCTTAGAACAGCAGCCACGCTGCA  
CTCCCGCTCCTCACCCACCCGACCATCCCGCGGAAATCGTCCGCTGTCTGTGCAACTCTTACGACGCTCC  
TTTTTCCTTTGCCCTATTTCTCTCTACTCACGTCCGTTCACTACACGAG

>lmaj\_20\_4\_up with T67338 615966, 616367

CCCACCCTTCTCCTCGTAGCATCCTTTACCGATAGGTGTGCGTGTGCGGCGGCGGAAGTGGCGACTGAT  
CAGGCGCCGAAAAACAGAGATAACCCGTGTGCGGTGCAGCTCCGTTCCCTCGCGTGATGTTACGAATGGT  
CGTTGCTGCCGCTCCGCTGTTCCACGTTGCCATTGGCTTCGATAACCTGCGCCCAATCGCTTCACTTCT  
CCGTCTCTCTGTCTCCTGTATGGCAACTGATGCGCGTGACACTGCCCCACCCCTTCCCGTGTTC  
CTTCCCTCGCATCTGAACTGTCTTGTACTCGTGGCGCCTTGTCTTCTCCTCTTCTACTGCTCTGCTTTT  
CTCTCGCTGCCCTCACACACGTGTGTGCGTGTGTTGGTGTCTGATGAAG

>lmaj\_20\_5\_up with T67395 281584, 281985

GAGCACGTGATGCGATGAGGTGTGGAGGGAGGGTACTGGTGGCGGTGGAAGAGGGGCAGTGAACAAAA  
AACATGTGCGCGCGCCATTGGCGCGACCCACATGCGCACCGCACCAAGAACGAATGCCCGCTTAC  
CAGCCCTCCTTATGGCGACAAGGACGGGGAAGTCTCCTCTTTCCACCTCCTTTGCCCTCCGCCCCTGA  
ATGCCTTGCTGCCGTTGTCCCATCCGCTGTTTCACTGTCTCCAATCCACATGCGCTCTTATTGATCAAC  
CCTCTCGCCTGCCCTCTACCCACCTTTCGGCCACGACACACACACACACACACACCACCACAACA  
ACAACAAAAACATGATCAACTACAACACCACATGAAAAACGCCCCAAG

>lmaj\_21\_10\_up with W88399 433674, 434075

CCTTCGACCGGAGGTTGCACGGGGTGGGGGGGGCTGTGCTTGGTTGGTTAGGCATCGCCTCATCTATTT  
CCAGCGCACGGCGTGTGTGTGCGTGTGTGTGTGTTGGGGGGGTGCTAGCGCCATGCAGGGAGTTCTGC  
CGGTGAGACTTGCCACCTTCTGCCTCTCCTTGTCTGCTGCTATCTTTAAACAACGCACTTACTCGTCGCC  
TCTCTTTCTCTGCCCTTTGCCCTCCCGTGCCTTCTCTCGCTCGTCTGCACGCGGTGATGTCTGCGGC  
CTGGCCTCCCCAAGTTGCGCGCTCTCCGATGCACGCCTTCTCATGTTACACGCACATTATTCTGAAA

CTCCACCGGTAAACGCCACACGACCCCTTCCCTCCTCCAACGCGACAG  
>lmaj\_21\_11\_up with AA125611 70804, 71205  
CTCGCACAGGACCCATTACCGAGAGCCGAGGCACGTCCCCTCGCCTTAGCATGTATGGGCGGGGCATCTC  
AGCCCCACAATCATCGTGACGGCTCTTCAAGAGCGCCATATGCGCGGGCGGTCTCGCGTACTGCGGCATG  
CCTCGCACGCGTGCAGAGATGGAGGTAAGCGCACGCACACGCACACAGAAAGGCACCTACGCACA  
TGCCATCGTACTACGGCGCCGTAGCGGTGGGAGGACGCGCGCCGAGCCATGCGCGGCACATGTTTTCA  
CTCCACCGGGGATTCTGTTTCTTGCTTAGGCGCCTACCCCGCCCCCTGGCGGCATGCCCGCACTCGCC  
TAACTCGATCCGCTTTTCTCTGCCACATGCTCCGTCAACAATGTCACAG  
>lmaj\_21\_12\_up with T93400 10062, 10463  
TCATGGACTCTGCCCCCCCCACCCACCCACCCCTGTTTTGTATTTTGTGTGCGACGCTGTTGTTTCTC  
ACCGCAAAGGTTTCTACAGGGGCTTTTACGCGCATTGAGGAATACTGCTGAAGTGCAGCTGCATGGTT  
ATAGAAAAGCTAAGAAAAGTGAAGTTGCCTCTGTAAGTCTGCGAGCATTGCAAAAAGTGCATGGATGTG  
CGAATGAAGGATTTTCTTTCCGATGTAGCTCTTTTGAAGAAAAGCAGCTGCAAAGCCACAAGACAGTGG  
TCCGAGCTGAGAAATCAACATGATGGTCCCCTCTGCATCCACAAATGATCTTCTTCTTCGATGCGCCTT  
CTGCATTCATCGCACCCGCTGGTGTTCATCACTGAATTGATGGGGAAAG  
>lmaj\_21\_13\_up with T93452 234026, 234427  
GGGAAGACACTCTCGCGGTCCCTTGTAGACTAGCGACGATGTAACGCGGAAGTGGATCAGATGGCGAAAGA  
GAAGGGGAGAGCACTTCCCGACCATTGAGGCGAAATAACAGCCTTGATCTCACATGGAATGAAAAGTGG  
TCGTTTTGGGATAAGTGCGCAGTATCCCAATTTGTTTTCTCCTCCGCTTTTTCAAATCCTTTTCATCTCG  
TTACTGCCTCCACACGCTTTGCTTTCTCTGCGACGCGCTGCACATAATGCGACTCCCACACACGCCACC  
CGCATTCCCACTCACACACAAACATAACCGTATACGCGTCAACACCAATTCTGTGGTGAAACGACGACT  
GCCTGTACTTCTCGTCTCCCTTCCGTGATATTCGCCTCGACACGCGCAG  
>lmaj\_21\_1\_up with T93405 343933, 344334  
TCTTCGATGAGTTGTTTCATCGCTCTGTCTGCGTCTGTGGACGATGCGTGCTTGTGTGCGAGTCGGTGAG  
GCTGTGGGAGCTTACCGTCTGCCACACACGTTTTCCATGCATCTCTTTCTCGCACACCTCCGGGGCAGC  
GAGGTGGTGTGGCGGAGCAGGGAACTGGTCGCTTGCCACCGGCATCTTCTCCCTACCACTCATGTGC  
TGTTTTTCCCGCCCCACCCACTCAACACGGCGGCTGAACTTTCCACGCATCTGACGTTTCATCTCCTT  
GTTTTGTCTCTGAAAGCACTTCCCTGCGCATGCGTTCACTTGTGTTTGTCTTCATGCACGCTTCCCCCT  
GACCGCGTGTGCTCGCTCGGCTGCGGTGACATCCTGCCTCCATCGCCACCCAG  
>lmaj\_21\_2\_up with T93427 725925, 726326  
CATTACAGTGAGTTGCAAACCTGGCACCTTCCAAAGTAATGAGCAGAGGATGGGGAGGGGGGGGGGAAG  
AACTGGTCATAACCTCATGCGTGGCAGTCGGACTCCTTTCCAGTTGTGTACAGCAAAGTCCAGAGGAGG  
GGGCAGGAACGCCTACAATCAGGTAATCTTTCTCTGTGCATCTCGTTTCTCGCAGTTCTTGAGTCACTT  
AACAATCAAAGCCTTCGATCTCGATTTCCAGCATGCGGTGAGACGAGGCGCTCGGCTGTGCAAGTACA  
GAAACTCGAGACCCAGTGTCAAGCTCCTTTTTTCAACCTTCATGGCACCATCTCGACCTCTGCTTACAT  
GCGCACAATCTTCTTTCTCTCCGCTACATACCTGCGGTGGCAACTCAGAG  
>lmaj\_21\_4\_up with T67334 365551, 365952  
CCTTCTGTTTTTTGTTTTGACTGTGTTTCGGCTTCTCGCTTCTGCTGCGCCACCGCTGCTTCCATGAA  
CCCCCCCCCACTTGCCGTTGCTCGGGTGACGGTCATCTATGCCTGAGAGACATCATCCCCTGACAGTG  
ACCCACCCCTCCCCCGTCTTGGCCTCGCCGATGCCGCTCCACACAGGCACCCACGCGCAGTCGCCTCG  
ACCCTCCCCTTTCTGCTGGTTCGATGGGAGAGACAGGCGCAAAGGGAGAGGGGAGCGGCGTACAGCTG  
TGATGCCTCAAGGCAGCGAGGGAGGGCGACAGCCGTGCCGCCCGCCCTCCTCCCTGCTCACCGGAGGT  
GTGCACTCGTTTCATCTCCCGCTCCCTCCCCTTCGTCTTCGTCTTTGTAG  
>lmaj\_21\_5\_up with T93426 35820, 36221  
TCCTTACTAAAAGAGGATGGAATGCACAAGTGGCAATATACCCACGCTTGTTAACCTCCCCATCTCACTC

TGCCACTGAAGACGCGCTGCTGAGATGCGCAAAGGTGGGAAAGAGAAAGGTGGCGGCGATGTGCGTGTGC  
GCATCTGCGGTATTGCGGACTGTCGGCTGCAAGAGCTACAGTGCCTCAAGCCGGTGGCTATACCTCTGT  
TCTCGCTCCTCTGCTTCTCCATACACATGCTGTACGCCATGTCCGGCGGCTCCCCTCCCCTTCTCCCC  
TTCAGCATCTTGCATTTTTCCCTCTTACACCTTACCTGTCTCTCTCTCTCTCTCTCGAAAACCCCT  
CCTCGCTCTCTCGATTTATTTTCCCTTCTTCGATGCGCACGACGCGGCAG  
>lmaj\_21\_7\_up with T93425 224548, 224949  
CGTAGGGCGATGAGTGAACAATCGTGGTTGAAACACGAACTCTTCCCTCGTTTCGCTGCTGCTGAGACTCT  
TTCAGTTGAAAACCGATTCACAAAGAAATCGACAAGCAGATGCGCAGACATCGCACCCCTGAAGCGTTC  
CCCGCGCCGAGTGCGACTTCTTCCCTTACAACATCAAACATGAGTTTCGGGACGGTGTGAGCTCACCGCC  
ATGGACAGCCGGAGGCGTAATCAAAGACCCGAATGAATCTAGCAGTCAACTGTGAGCTCCTTGTACCT  
TGTACTCACCCTTCTCGATAAGCTATTTCGTAGCAATTACATGACACCCACCTTGTGTTTCATGCACGC  
CACCTACTTGCAAAGGTCACCTCGACATTTTTGCGAGGATAAAGGGAAAG  
>lmaj\_21\_8\_up with W88261 41082, 41482  
ACTGGAAAGGAGTCCGACTGCCACGCATGAGGTTATGACCAGTTCTTCCCCCCCCCTCCCATCCTCTG  
CTCATTACTTTGGAAGAGGTGCCAGTTTGCAACTCACTGTAATGAGCTGCGGCCCTCATGTGGACTCATT  
GCGAGACTTACTTATCCATTTCTGCGTCTCACATGACCAACCAAGATGTTTGGCGTCTCCTGAAGTAC  
TTCGCACAGAACCTCAAGAAATCGGGAGGAAGCTCGTGCATGCTCCAGATGCTGCGAATTTATCCTTG  
CGAAAGCCACGATGTGGTCACGCGCGCTCATACTAGCTATTGGTGGTGCCCTTCCGAAGACATTGATC  
CCTAGAGCCAATAAACCTTTCGCCTTCTCATCCCTGCATCTCTTTGTAG  
>lmaj\_21\_9\_up with AA125634 226660, 227061  
GTGTGCGCAAGGAGAAGCGTGCCTTGAAGTACTGCAAGAAGCGTCTTGGCGATTTCACTGCGGCAAGAA  
GAAGCGCTCGAAGATGGAGGAGGCGCTGCGTCACGCGACCAAGAAGCACCATTAAAGTATTCGGCAGCTG  
TCATCACTTTTTTTTCTACTTTGGCAAACATCAAGCGAGAACATAAGAAAAAAAAATAACCAAACACCAA  
TACAAGGATTAATAAAGTTGTGCTATCACAGCGACGAAGTGCACCTTTTCCGCGGAGCTACTCCTGTGCT  
CTGTTGCCCTTCTCTTTTTTTGACGATGCCTGTGATATCGATTGATGCTCTACTATTCTTCTGCACTATC  
ATCTCTGTTTTCTTGAACCGCTGCACTACTCATCTGGGTGACATGAAG  
>lmaj\_22\_1\_up with AA125626 123150, 123550  
GACGCGTGGTCCGATTGAATAGCAGGATGTTTTCTCCAAGAAGAGCACGATTTAGTTATATTCCAAGAGA  
GGTCCGTAAGGTGTGTTTTGTGCGTGTGGCTTGTGCACTTGTGTATTGGAAAATAATGCGTTAACAAAGA  
AAGATTTCTCGCTCCTCGGCTTTGATCGAGGTGCAGATGATGGCAAAGTAGCTTAGTCTTAGCCTCTC  
TTGCCCCCTTACAGCCGGCCAATCATGTGTGCGCGTGCATGCGCTGTATGAGCACGACCCCCCCCCC  
CCCCCAAAAAAAAAAACAATGTACGCTATGGTCCACTTCTTCTTTCCCTTTTCCCTTTATTTTCTAAA  
CCTGTTGCCGTGTCTCCATTCGCTCTGATCACGACCGTCGCCGAACACAG  
>lmaj\_22\_2\_up with W88317 448939, 449340  
CTCAGCGCTCCAATCCACCGCCGACAAAACCTCACGATCTTGAACGCTGCTCGCCACGCCAATAATTTGC  
AATCCTTTTCCCTTGCTGTGATTTTCGTTGCTGCCGTGGTGTTCACGCATGCGCGACGAGGTTGTTGCTGT  
TATTATTACTGTTGTGAGACCCCCATGCACTTGTACTCGAGACGCGCACGCGCGGAAAGCCTTGTCCC  
CGCCCCGCCAACATGGACCCATCTTTGGTTGTCTTTGGCGGTGTCTATTATCGCCCTCTCCACTGCTGCC  
CTTCGTCCCCTTCTCTCTCTCTCTCTGTGTCTGTCTGTCTCCTCATGATCTTATCGAAATTGCTTGC  
CTGCTCGCACGTGTGGTTGCACCTGGGTCTGTGTGTCTTTGGTGAGTAG  
>lmaj\_22\_4\_up with T67353 161708, 162108  
AGACGGAAGCGACAACCGTACGAGGAAAGACAAGGTGCGAAACGCAGCAGCCTTACATGGCAGGACGAC  
CGCACAGCTGCTCTGCACACGCCAAGGCTGGATATGAACGAAACAAAGCCACACAGAGGCAACGACAGCA  
ACGCAGCTGCACCACATCGATGGGTGTCTCCGTCTCTCCACCGCTTCCCCTCCTGCTCCCCACACTCGCT  
GCGTGCACGGCGCGGCCGCCGCGGTGCGTCATAGTGAGTCGAGCTACACATGCCCTAGCCTTGTTTCA

CTGCTTCTTCTCGTCATCTGCCGCACAGCCACGCCACTTGCATCCCCCTCCCCCTCCCGCTGCTGCTTC  
TCCCCACCACGACTCCTGTGTA TTTCTTTCATGCCTTTTCTCGACCAAG

>lmaj\_22\_5\_up with T67365 672810, 673211

TTACACCCCATCCCCTGCTTATACATCGCAGCAGGGATCTTTTCGGGTGGCGGAAAAGGTAAGGAGGGGA  
GGGGGGAAGCTGCTACGTAAGTCTGCCTATCCGTGCGTAGGGTTAGCCGATGGGGACTTGAAAACAACAG  
AATTCTCAAGGATGGCTTTGCCAGCGCCAGGAGGTATCGAGAGCGCAAGTGGAGGGATAACCAGTTGGTA  
TACTCACCCACAAGAATAGGAACTCGCCAGCCAGGATGGGTTTGGGCACATGTGTTGGAATGCATCATG  
CTCATCGTTTTTGCATCATTCTTTGTCTCTCCTTGTCTTTCTGCCTTTTGGGTGTATGCCTTCGTTGTT  
GCCGATGCTCTCCTCGTGCTCCCTGCTTGCTCTCCATTCCCCTGGCACAG

>lmaj\_24\_2\_up with W88372 29600, 30000

TAAACGAAAGACGCCCCCTCACCTCACTGTTTTGTTGGTGCCGCTTATGTTTTGGCGCTCTCCTAGAA  
CGCACACGATTTGTGAGGGGTTTCAAGAGTGTGGCGTTCATGACGGAGGGAGCTGAGCATCCACACGAAAA  
GAAAACAAACAGGAGAGTCTGCTACTGTGTGGAGCAAGACTGGGCAGGCTCTAAGTACCTTGCTGCGAT  
CCCCTTCTGCCTCCCAGACGGCCCTGTCTGAGGCTCCTCGACCGTTATGGCGATGAACTAATTCTGCGAT  
GCAAACTTTTCTGTCTGGTGCCTCCTCGCTGTACTTCTTGTACTTTCGGTGAACGCTACAATCTACACGG  
GTGTTGTGCGAGGCGGTGCTGCTCTCTCTCGCATACGAGGCGGTGGAAG

>lmaj\_24\_4\_up with AA125647 59385, 59785

CGTGTGGCCGTCGCCAGCGGCACGTACACCACGCGAAGGCCCTCCGGAGGGCGAAGGGCGGTAAACAACG  
AAAGCTGTGCGATCCCTCTCTTGGAGTGGCCTGTCTGCGTGCCTGCGGGGCTCGAGGGCGCAATGAGCAT  
CGCGTTTTTCGGCTACCGCATTGCTCTCGCTCGCTCGCTCTCTCCGTCCTGTGTACGGCGTGCACATC  
TCGCCGTTACGCGTCCCCGCCGCTGGCTTGGCATGTGCGCTACATCACTCTCTAGATGGTCAAGAGCAT  
CCTAAGGCCCTCTTTCTCCTTTGTGCAGCTCTGTCCATGCCGGTGATACACCCCTCACGCCTTCTTTCTTT  
TCGCCCACCCGCCCTCGCCCTCTCCCTTCCCTACCTTCCACGCCTATCAG

>lmaj\_24\_5\_up with W88296 335766, 336167

GCACGCGTGTACAGGGGAGGGAAGGGAGCGTGGCAGCGAGCTCGTGACACGGGTGCGCATGGAGGTAA  
GCCACGGCTGTCTCCAGCGTGGTACTCATGGTTGTAAGCTATGCAAGACCCTTTACGAGCGCGGAAGC  
GCTGACCGCCTTCACGCCACGCCTTTGGCGTGTGCGCGTGCATGGGTGTATACGTGCACATTTGATGC  
GCCGTGACCGCAGGACGTGCGAAGCCAACGCATCCCCTCACGCGTCATGCAACGCCGCTGCCCTCCCAC  
CCACCCACCCCCCTCCTCTGTCCGACACACACGACCTTCAACTGCCCCGATGCCGGCTTTTATCGT  
TTCTCTCTCCTCTTCTTACGCCACGCTCGCCTTGGTTACATCCGCGTAG

>lmaj\_25\_10\_up with AA060769 863601, 864002

TTTCTCGAAATTCTACTCGTCCGCGATGTGCTGCATGGACTCGCACCGCGGCAGGCAGAGGCCGAACGCC  
GATTGCATCTGCTGGTTTCGTGCTTTCATCGCATCTGGGTTTGTGGTGATGCACAGCGGCCTTGAGAGCCA  
CTGGCGGTTCGGTGCATCCACTCTGCCTCTCTCCACTCTCCGCCACTCCTTTGCACCATTCTTCTCTTC  
CTCCTTTCATCCCTCTGTTTCCCTCTCTCGCCTTCCCTCACGCGCCTTCTTGGTCTCGCTTACCTCTGC  
GGCTGCTGCTTCTGCGACTTCCCAATGTGGCCCGTGGCGGACGCGGCTTCTACTCCTGCTGCGCCACACA  
CTCTCTCTGCCCGTGCACGGTAACTTTGCGTGTGCACGTGGCCACTAAAG

>lmaj\_25\_1\_up with T93382 831175, 831576

CTTTATAGGCACCACAGACATCATAAGCGGAAATCGCATGATTCGATCGTTGCTGCCGTTTGAACCGGCT  
CGGTGAAGGGCTTCTCTCTCTCTCTCTCTCTGCGCTCCGCTTCCCGTTTGTGTTGCTCCCTTTCTCCTC  
TGGCGTGTGTCAGCAACAGCTTCGCGATAGCAGGCAGAACAACAGAACTTTGCTTTGTGCTCTCACATGC  
TATCTGAAAGCGCCAGCCTCGCTTATTAGCAAATCTGGTGAGATAAGCAGCGTGTACACCTACGCCCT  
GCGCCTGCGACGATGCTCCCATGCTTGAATTTGATGCAGTGGTCAACTGTGCCTGTTTTCGCTCTTTTC  
CCACTCCCTCTTCGTCTTTCTCAGGTATAATGCGCATTTTTTGGCTTGCGAG

>lmaj\_25\_2\_up with T93470 104826, 105226

TCCTTTTTCGAACGGAGTCGCCTTTCATGTATAGCGTGCCTGTGTGCTCTGTGCCTGATGCCGCCGTCTG  
CAGTGACGCACAGCCAACTACACCCACCGCTGTGCGCATCTCGCTCCCTTGCTACAGACAGTGGCAGAC  
GTGGGTTGTTGTGCCGCGCACTTTCCCCTCCTCCTCCTCCCACCCCTTGACCTCTCCTCCCTTTCT  
CCCATGGTGTCTGTATGGGCACTCTCCCGCCGCGCTGCTTGTGCTGCCGCTGGCGCCCTTGTGCAACAC  
ATCCCCATTACACACACACACGCACTGCCTTCTCCTCTCAACACACCAACGCGCGCACAGCTGGCGC  
CCTCTCCTCCTTCCAAAAACAGTCTCTCTCCCATAACGACGCCTCACAG

>lmaj\_25\_5\_up with W88406 891003, 891404

TTCTCTTGTCTCTTTCACTCCTTACGGTGCCTCCCCCACCTGGCGCCCGCCTTCCACGCCTTTTCTC  
CTCTCCAAAAAAGCGCAGGAGAGGGGATGTGTGTTCCACAGATGATCTCCCTCTTTCTGTATTGCTG  
ATGATGGCCCTGCTGCTGGTGTGCCCTTCTCTATTCTCCTTCCATTGTTACACCACTCACGGCATCG  
CGCTGCCGTGGGGTAGCGACGCGCAGCACTGCTGGTGTGTTGACGTGCTGCCATCGTTCTTTGGCAGAC  
GAGAGCTTCGCCGATACACCAGCCTCCACTTCCGCTATGTCTATCCTATTTTCTCGCTTCCACTTTTTCT  
GACTCTATACGTCCGCGCTACACCGCACATTATCACCCACCACGCTGCAG

>lmaj\_25\_8\_up with T93473 829026, 829427

TTGCTTGTCCGGACTGTCCGGTGGATTACCAGCACGTAAGAAGGAAATGTAGGTATCGAGTCGAATTCAC  
ATCCACGTTGAGAGCGACAAGCGGACGCAACATAGCAATTACAGCTCGTGATCACACACACATGCACAG  
CGTATGTGAGCATCGCTTTTTCGTCTTTCTCTTGAAGGTTAGGCATGCTGCACCAGGTATCCGCTATGCA  
CAGCTGTGGCATCGTTGAGGGCGCCACGTGTCCTGCGTGCCGGCTCTTGTGCTCTTTTCCCCTCTTG  
AGCTGCGTGGGCTCTCTTCAATGGTGCCTCAGCTAGCGTCTTATCTCCCATCATTTCTCTCTCTGTAAC  
AATGTCATTGCTTCTGTCTGAGCTGGAATTGATTCTTTCTGGCACGCCAG

>lmaj\_25\_9\_up with T93448 837957, 838357

TGCAGCAGCGAGAACTGAACCACAGCAGTGCCTCATGTGGCGCACAAGGGCTGAGCAGCAGCAGCTCTTG  
CTCTGCCACGCAAGAAGTGCGAAGAAGAAAGCTAGAGGAAGCGGTGCCGGCGGGGCTGAGTCGGGAGCG  
TGTGCCTCTCCGCTCTCACCTCGTACCGTTCCTCTCTCTCCAAGCGCTCCACATGTATCTGCGCTCCGC  
GCTCCTTCTCTCCAGGATTGTATCGACTCCTGCCTCCGCGTCCGTGTTTATGCCTCCTGCTAGCACAAAC  
CTCCCTTCCCCTCCACACACACACACACACACACTGCTGCTTGTGATCTTTGCGATTGTTTCGT  
CGTTGTCTCTCACCTTGTGCTGAGCGCATCATTACTGGAGGTCACATCAG

>lmaj\_26\_1\_up with W88337 953017, 953417

TCCGGCTTGTATCCTTTGTCCATTATACATGCGCACGCGCGGTGTCTCCTTGTCTGGATGGGTATTTGT  
TCTCTGGCTTATTCTATGTTTCAGCGTGCCTCTGCTGTCTTTCCCCAAACAACTGTTGGGACGGTG  
CACTCGAGACTCGTAAGCACCACAGGCCAACCAACCCCTCCCTCCCTCCCATCCCCGTGATGGT  
GCGGATTCCGCTAAAGCGACCGCTCATCCGCAGTCATCTCAATGCACCTTCTGCTGCAACGCATCGCGT  
GGTCAGCAGCTCGAGCACCTACGAGAACAGCTTGAAGCGACTCACTCCTTGTGCTTGTCTTTGCCGCCC  
GCCTCACTCCTACCCCTCTCTCTACCTCCGACTGCCCCCTCCCGCTCAG

>lmaj\_26\_2\_up with W88411 630026, 630427

CTCCTCACTTCTCCCTCCTCTTTCCCCCTCGTTCTTCTCTTTCTGTTGCTGATGTGTGTTTGTG  
TCCGGGGCCGTCTGGCGCCGATCAAGCAGCATGTATCCGAAAAGGGCTCGAGGAAGGACAAGAAGCTCCT  
GTTTTATGCGTGGCCCAATTCAGCTTCAGCGGTTTCGTTCAAGGCGACTAGGATTTCCGCGTGGTGTAA  
AGACGTATGTGAACTGTGGCTGTGAGCTTCTATTTGCTGACGTGTTTCGTGGCCAAGTGCCACATCGCGAG  
AAGTATGGGTGTGTCTGGTATTCTAGATGCCGGACATTGTGTTTTGGAGTGTGTTTCTCTGTCTATAT  
GTCCTGTCCCTGTGTTTCCGCTCCTTCTCCTTGCTCTTTCTCCGCCAAG

>lmaj\_26\_3\_up with W88398 902494, 902894

CTGTTTCGCATGTGGGTAAACGCATCCAGCCTAACGCGCAAGTCACAAGGCATACGGATGCACAGCTAA  
TAATGGTGGGCTCACGGACATGCCGCTCGCTAAGTGCAGTTGCGAAATGCAGGCTGCATGTTTCTCTT  
CCCCTCCGATTTCTCGACGCACCCGGCTGTGTGCGATCTCCAATGGAGGGCGTCTGCCCGCTGCTCTC

ATGCGCGTGCACCCTTTTCGATTGCTCCTCGCCCTTCTCCTACGAACATTTCTCTTCTTCGTGTGCTCT  
CTCCCTGGTGCACGAGTACGCACGCACGCACACCTGAAATCAAGCTGCCCTGCTCCCCCTTCTTCCTTC  
TCTTTTCTCTGCTGTGATTGAGTGCCGGGAAGATTACCGTGACAG  
>lmaj\_26\_4\_up with H64198 934489, 934890  
TGGGCTAGTGC GCGTTACCGCTCTCGCCGCTTACCGCTAGGGAATGGACTCGTCTCCCACCGTGAC  
GCTCTCCCGCCCTGTATCTGTACGCGTGTATGCGTGTGCGCGTGGTGCAACGATCATGTGGGTGACTCCA  
TCACTATCCCCATGCGATCTCTCTGTTTTTAGTGTACTGAATGTCTTCTCTCTGCCTCTTTCTCTATCCT  
AACGTGCGCCATCTCACCCGCCATTCTCCTCCGCCCCCTTACCCCTACGGCCCTACCCACCACCTTCTT  
CTGATACATCACATCCATACATGTGCGTCAACGTGTGTACGCGCATCGGTGTGCTGCTCGTGCATATA  
TGTGCTTCCCGCCACCGCCACCACCTCTTTCTCCTCCTGCGACGTTACAG  
>lmaj\_26\_5\_up with T93469 786062, 786462  
CGGTAACGAAGACTGCGTGTCTCTGGGTGAGGGTCAAGGAACTCAGGGTCTACTTCTGACCTGTGTTA  
TTTTCTTCCAATTACTTCACTTACTTATTGTTGTCGCATACAAGAAGCAAAAATCCTCTATAGGA  
TGACTTCCGCGCGTGC GCGGGTACCGGTATGTCTCAGTGCCTACAAAACTAGGCTAGCTGTCTTACC  
ACCGTTATATGTGCGCTAGCAGAACATTAGCGTTTTAGCCTCAGCTTGGTGCCTGCCCAAATGTTGCG  
AGCAGTCTTTTTCCAGTGTGCTGGTGCAGCAGGTGCTTTCCATTCTCATTTTTCCATTCTTTTTCTTCT  
CTCTGCTTATCGTGGTGCCTTTATGCGGGGGCAAACCTACACGTGTAAG  
>lmaj\_26\_6\_up with T93410 1028040, 1028441  
CCCTTCCCCACCCTCCTTCTGCCTCTCGCATGCTGGTCTTTACACGTGTACGAGGAGCTGAAGGTGAA  
GACCACGCGCAACGATTTCGGCAGCAGACTGAAGAAGACGCGAAGCCGCCCTCGCGGCCACGGGCGCAG  
AGGTGCGAGAAGGGAGGTTGGTGGTGCCTCGTACCAGGGCGCAAGGGAGGAACAGCAGGTGCTGGGCA  
AAGGCGTAACGTTGCCAATCTAGTCAAGGCGCTTCCGTCTGTTTTTACGAGAGCGTCGTAGCCTCCTGT  
CATTGCGGATGAGGTTGTGACCCGCCAATGCCCGGCTGCACGTGGTCCATTGCTGCCGCGAAGCGAT  
CTCACGATGATCACTCAGTCCCTACCCGATCTCGATCCCATTTTCGGCAG  
>lmaj\_27\_1\_up with T67350 294481, 294881  
ACATACACAGCGCATTCCATTGGCAATGACAGCACGGCGTGTGATGCCACAGCGGGGGGAGGGGGGGGT  
GGTAGACGGCGGCACGAGAGGACGAGAGTGAAGAGTACGAAAAAAACAAAGGATGCATCAACGACAGCC  
GTGGCGGATGACTTCTGAAGAGGGAACGGCTGCTCCTCCCCCTCCCCTTCTTATCTCACCCCTTGGCGA  
TCTGAACCCGCTGTCTCCACACTGTGCGCTCCAGCCCTTCTCTTCCCTCCACCGATGTGCGTTGTGATT  
CGTCTTCTGTTCTTCTGACCATCCTTTCATCAGTCCAATGCTCTCTAGTCTCTCAAACCCCTTGTCTTT  
TCCCCGACCAACCCCTCCAAACACACATATACACACACACACACAG  
>lmaj\_27\_2\_up with W88354 1070549, 1070950  
TGTTTCTTTCGGTGACGTCCACGTGCGTGGATATGTCTGCGTGTCTGTGCGGCGGTGCCAGTGCGTGTG  
GTGTGTGTCGGTTGGGGTATCACTCCCGCTCGCATTGCTCATCGCCGTTTACTCCTCTATTGGTTCTCAT  
TATTTTACCCTCAGGCGACGCTCCGAGGCGTGCACACGGCTGGTAGCACGGCGCGCAATGCCTCTAATG  
GCCACCATGCGTGGGATGCCTATGCGTGTGTCGGAAGAGCACGCCTCACCGATGCTCTTCCCTGTGCG  
CTACATCTCTCTCTCTCTCACACACACACACACACACACGACACACACACATCCTTCCCTTGTCTCTCG  
CTCTTTTTACCTTACACACACACGACACGACACATGTGCACACGGAAG  
>lmaj\_27\_3\_up with AA060756 150362, 150762  
CATCAGCGGGCAGCGCTGCGGATGCTCGTGCCTCACACCCAGCACACGACCCCTCAGCCGATTGGCGCT  
CCCAGAAATGAAACAAGAATCATTCTGTGATTGCCGTGACTTCAACTTCGAGCGGCTACTACTATTCTT  
GATCAAATCGCGGCTTGGCTCTCTGCTGCGTCTCAAAGCTAACACCGGATGAGCTGCAAACACACGATCT  
TTTGGTACTGCATAGCGGCACTTGTTCGACGCTGGTAACAAGGGGAGGCTGTCACTATATTCTTGATTAC  
CCTTCTCGGCGGCATCTTTTTGTTTATGCGTCTTTGCCTAATCTGCCTCCTCTGCACCTTTTACCTAATA  
CCCGCTTCTCCATCCACTCCTTCAAACGGTGCCTCTCTTTTTCTGCTAG

>lmaj\_27\_4\_up with T93414 535785, 536186  
TGCTGCTTTCATACGATTCAGAGGTCGTGGCTTCACTTTATTGGAGGTTATAGGCTTGTAACCGAGTCA  
TCGCTCTTTGCATCTTAGCGACAGTGGGGCGACAGTACTAGTTGGGCACACACACATCCATACACACAC  
AGGCGAAGAAAACGTTTTTTTTTTGTTTGTGGTTATCTAGAAGCGGGTCGCGTATCTTAGTGTTGATGAGGA  
ATGTGTGCAGAACAAAGCTTCACAATACGTGCAGCGTGTGGTGTCTGTTGACCACATCTCTTTTACTGTGT  
AGCTGCGAGATGCGCCTCGGTGGCGAGTTGCCGGTGTCTTTGGGGCACCTTACACTTTTCCCCTTCTTCT  
CCTTTTTCACTTCTTGTCACTGTATCAGGAGCACGCGAAAACGAGTTCAG

>lmaj\_27\_5\_up with W88278 298867, 299268  
CTGCAGTAGCATGCAGTGTGTTTTTTTTTCCGAAACTGAAACGAACAAAGATGTGACGCATCTCAGCA  
CTCATGACTCCCTGCGTGCACCAGACGAATGTGTGCATCTGCATCTGTGTGCTTTCGCGTGTCTCAAAGG  
CGTGTGCCGCCCCACCCTCATCAAGCATGGCTTACAAGCTATTTCCATCGCATGTGCGTGGGTCATAGA  
CGTCCGCCCCCTCACGGCCGCTGCTAGTACATTAGCCTACTTGGGGCGCCGCGTGTGCATCGCTTTGTGCC  
CGTGCCATCTCGTTTGGTTCCTTCGCCACCTCATCTCCTTGCCTTGTGCTGTCAGCTCGACGGTCCATC  
TCCTTCTCCTCACATCGTCTGGGTTTTCTGTCTTGGCCCTCCGTGGAG

>lmaj\_27\_6\_up with W88298 1059002, 1059402  
CACCGCCTCGGCGTCCGATGATCTCTGTTTCGTGCGCCGCGTGTGACGCAGGCTCACTGCGATCACTGTT  
CATTTCGATTCTCTGTTTCGCGAGTATTTTCGCTTGCAGCGTGGTTTGCATCCCCTTTCTAAAGCAGAAATA  
GCATACGCTCCTCAGCTTCTTCTCCAGAGCTTGTACTGTTGAACCCTACTTGCAGTGTGGTGTCTGTTTT  
CCAGTAGCTGCTGTAAGGGGTGCTGAGACACTTCTCATGGCAATGTTGTGGAATAGTGAATCCGATGCAC  
CTGTTTTCGTATTCTGCCAAGCTTGCTCTTCATCTCCTCATCTTCACTCTCCATTCTCACCTTCTTCC  
GCTTACTTTGCGTCTGCCCTTGGTTAAAACACTGCTCTATAAACGACTAG

>lmaj\_27\_7\_up with W88302 394794, 395194  
CCGTCCCTATGCGTCCGACTCGTGACCTCTCGAGTGCTCTCCCTGTCTCTCTCTCTCTCCCCCTGCATCT  
GCTTCTTGTATTGTTTCGCCCTTGCACAGTCGCCGCCACATCAAGAAAAGTGGGCGAGAGAGAGAGAGAA  
AGCAGGGGTAACGAAAAACGAAAGGCAACGAAAGGAAGAGAGAAAATAACCACAAGCGTCATGTGAGCGAT  
CGCATGAAGGTGCGCAGGCGGGTGGGGATGCGACACCAGCGGTGATGCTGTTTTTTTTTTAGTGATGGAG  
ACATTGTGCAGTGAACCCGAACCAAACAAAAGACGGCCGCTTGTGTTTTTGTCTTCCCTTGTGCTCCATC  
ACACTGATGTCTCTGCGTTAGCTGGCCCTCCCTCTTCTTCTCCTCGTAAG

>lmaj\_27\_8\_up with AA125624 83444, 83845  
CTTGTCATTTTTCTCCTCTGGCCCGCGCCCCGCGGAAGGGCCGATATGCAGGCGCGCCGTCACCGAGA  
CGTTCAGAGACATACTTCGAAGTTTTACTGGCGACTGCCAGTGGGCAGAAGCCATTTCGCAATTTATACTT  
GGGGTGCATATCGTGTCTTGGAGTATTACTAGGCTCCCTGCTGTTCTGTTATTCCAACCTCGGATGTCG  
CCTGCCTTCAAGCACTGTGGAAGAGGTAGCTGACTTGTGAGATCACTAACCGCATGCAAAGACGGTCGAT  
CCACATGATCCCGCCACACTCTTCTTCCGAACCTCTTCATCCTCTTGTGTTTTCCGATTTCCCTCATGTG  
TGACTGCCGCTGATCACCACGTGGCTTACTCGCACTGAAAAAAAAAAG

>lmaj\_27\_9\_up with T67304 1079532, 1079933  
GACGACGCTGAATGACGAGGTCTCTGCAGGGGCGGCGGTGGCGGTGATGACAGCCGTCGTCAGTGGGCC  
GGTTGCACCCTGCGCTTCTTTTGTATCAACATGCTTGTGTGCTATGTTTGCCTTAGCGACGCCCTGCCA  
CTCGTTGACGAGCGCCCAACCCGTCTTACCCCCCTCCCCTCCGGAGGCTGTGACGCGGCGCTCTGCGCCT  
CAGCCTTCCCCCAAACCATCTCGCATAACGCAACACGACACACACATATATATATATATATATATATA  
TATATACACACACACACGTGTGTGTGTGTGTGTGTGTGTATGCGTGCCCTAACGCACACCACATTCCC  
CTTGGCCTCTCTACTCGCTCCCTCTTCTCCTAACCGCGTCTTTTCTGCAG

>lmaj\_28\_1\_up with T67377 824435, 824836  
CAGCTAAGATTTTGGCTTGGATCGGCGTTTGTCCGCTGATTTTCGTCTGTACAAAAAAAAAATATCGCA  
TGTTTCAGTCATTGGAAGAAGGAAGTGGTTGGTAATGAGTACGAGCGTCTTTAAACTTTACAGCTTATTC



TTCCCGATATGTTTCCTCGAGTCTGAGTAACTAATGTACATATATATATATATATATATACACGTATAC  
ATGTATGTGTATATAAGGAGCACCCTTCATACCGGAAACGGAGAAGTAGGCCCTGCTCTAGAGCGAT  
TGGTGTGATCATGGCTCTTTTTGCGTGGAAAAAATCACGAACCCTTCATTTTCCACCGCTGTGTGCTT  
TGCTCTCTCTATTTCAATTCGATGCACGCTTTCATTTTCGATGCAG

>lmaj\_28\_2\_up with W88360 36420, 36820

ATTACTCTCGCCATTCTTGTGTATCATGGCGCACTTCTTCGACTTCCTCCGCGGTTGTCATTGACGTGGG  
TCTGGTGGTGGTGTGTGTCTCTGCGGAACTTCTTGAAGCGCACGCTTGCCGCATGCAGCCCGGGGCGTG  
GCGCCATCGAATGCAAACCCACTCCGCATGACCTAGGCACCTTACTTTCTCAGTCGATATTCGATGGATT  
TGCTCTCCCTCTCCTCTGCCCTGTCAAGTACACTCTCTTTCTGCTTTCTCTCCTGGTGTTCCTGCTCCG  
CACACTCCTCTGCTCTCCACATTTTGTTCCTTGGCGACTCTTGTTCACCTCACTTCTTGGCTTGC CG  
CGCCACGCCCCCACCCTCACACACATGCACACATATGCACGCAG

>lmaj\_28\_3\_up with AA060771 938332, 938733

GCGATCGGTGGCGCGCGCTTCTTTGCGTGTTCCTCTCCGCGCCAGTGTCAAAGGTATCCAGGGCGAA  
AAGGAGCGGGTGGTGGATAGGGGACGAGGAGGTTATCTCTGTGGCACGCTGCTGCCTCCATC  
CCAGTGACGAACATGATATCCTGTGTGCCTCGCCCTCCCCCTTTCACGGCTCTGCGCGCACCGCGTGT  
GCACCGCATCCTTTGTGCTCTTGCCCCCCCCCTCCTACCCCTCCACCTCGTATGCCGCGGATTCTT  
CTCTCGTGTATCCTTTTCTACTGCTGCTGCCGCTGCCATCCCCATCCCCGTCGATGGATGTGTGCACCCG  
CTTACACATGTCTGCGGTGATTCTTGTCTCATGGTCGATTTGAAATTAG

>lmaj\_28\_4\_up with T67340 585726, 586127

GTGTCCTTCGCGCTGGTCTGCCGCTTCCCTTCCGGGTAGATGGAGCCTCGAGCAAGCATTGTTGCC  
GGAGCAACAACAGCAACGACAACAACAAAAATGAACACGCAGACGCAGGCGCGCTTCTCTCCCTTCTC  
TGCATGTGTTCCGGTTCGTTTTTTTTGTTGTTGTTTTCTTTGGTTTTCTTCTCCTGCCGCGTGATCGTAGTT  
AAGCCTTCCCTCACGCAGCGTTGGGCACGTGCTACCCTACGGCACTGCGCAGCGGAGGTCCGCACAAGTA  
CGCCGATTACTTTTCGCTCTCGCTCTCAAGGCTCGGACGCGATCTGCAGGGACTCAGCTCTACCATCTT  
TTTCTCCTTCCGTCCTTCCCCCGCCCTCTCCCTCGTCGAAAACGAG

>lmaj\_28\_5\_up with AA125618 22446, 22846

TGATGCGTGGTGGTGTGATGGCAGAAGTGTAGCGCGATCTCGACACTAGGCGGTTATAGTTTCTGTTTTT  
CAGCCTATTTGAAGGTAAGGTGCTCCTAGTTGTTGTTTCGGGAAATTCCTTTATTGCGTACAATTCAAA  
GAACTGCAACCACTTGCCTTTGGGATTTTTGCTCGCAAGTCTGGCCGCACATTCTTCAATGCGGTGCGG  
CAGCGTTGGTACGTCGAGGTCTCTTTTGTTCCTTTGGAGAGGAAAAGAAACGGTGTCTCGTGTCTG  
CAGTCTATGCTTGAACAATCTCTACAGCTGCGTACTTTGAACTATCCTTTTCGTGCAAGCACTGCCCTC  
GTTGATATCCGCTTGACTTTTTTCTCGTCTCCCTCTGCCTCTCGATGAAG

>lmaj\_28\_6\_up with W88253 30221, 30622

GTATGGCAGTGAGTGGACATGTTGAACAAACGACAATGAATCATTATATGTTATGTAGCTCCTTACTC  
CGCACTGGAAAACAAGAAAAGAACAACCAAGCGACACCGCTTGTGTTTGGGGCAGCCGGTGAAGTAC  
TCTCTGTGGCAGGTCTACATGGAGTGGTGTGAGGGCCGCACACGCACAGCGGGGGAGTCTGCCGCGCCA  
TTTGCACCTGAGGGCGTCTCTCTTCGCATCTCCTATCTCCATTTACTGCTAGCTGGCAGAGTATGCACAC  
ATTTTACACCCACGTGCTTATCGGCCTATCAAGTCCTAATTCATTCTGTGTGCTTCTCCTTTTCTTGTCC  
GATCGTTCTCCTTGACATATTGTATCGAGGGATCCTGTGCAAACGCGAG

>lmaj\_28\_7\_up with T93412 113826, 114226

AAGCGTGAGTCATGGCTGCATGCAAAAACCACCGCTCCCCCCCCCTTCTCCCTGTCAAGGCCGTTGGAGG  
CACGAAAAGTGCCAGCCCCGCTGCTGCTCCCTTCTGTCTTCTCTCGTAGGGTGATGATGGCGAG  
CCTCGCCTGCTTGAAGTACACGTCACCGCCACTGCCACCTCTCTGACACACCGTTATCATCCGCGGT  
GACTTTTGGGTTGGCGTGACCTCACCCCTTCCGTCCTACTCCCTCTGCTGTCTGCTCTTTCTGCTCCT  
TCGTCTTCGACGTCTGGCGCCACATCTCGACGCGTCTCGCCGACCCCCCTGCTGTGTGTTGGGTG

GAATGGCGAACTCACTCGCCGATGGTGCACCACAACCTGCCCCATCTGCAG  
>lmaj\_28\_8\_up with T93459 114299, 114699  
TCCTGAGTTATTTGATTGCCGTTCTCTCGAGTCGGCACCCGCAGACGCCTCTGTGGCTGTCCGTCTTTC  
TTTGTCTTGGGAAAGTGAAGAAGGGTGTGTTCTCCACGGGGCGGCAGTAGCAGCGGCAGCAGGATCTGCA  
GCCACCGTTGCGAGCAGAGCGCTGCTTGCACCTGTACTCTCCACCCTCGACTCTCTGCATATATATCCTG  
CGCGTTGGGCAGTGACGAGCCGTAGCGCAGGCTTCTCTCGCGCTCTGCACATCCGCGTCGCTATTGTGC  
GTGCTGTTGCCTCGCTGGACCACGTCGTGGGGCCATCCGCAACCATCTCCTTCTTTTCTTTCTTCTCTC  
TGTTTCCGTCTCGCGTGCATCTGTTTACTGCCCTTGCCTAATCATCAG  
>lmaj\_29\_3\_up with AA060754 1166726, 1167127  
TCTCTGCACTGCTCTTTCTGGACGCACTAGGGTGGCAACGAGGGAATGGACTGCGCGGGTGGGAAGCTTA  
CAAGCAAGCAAAGCAGACGAAGCCTCTGTGCACACCCGCTGCATGCGCTGTAAAACGAGGTGGCTTGTGG  
CTCGCTGAAAACCGGTGCGTTGCCGTCTCCGTCTTCTGCGCGGCACGTCGATCACGCGACACTGCACCCTG  
CGGGGCCGTGGGCATGTGCTACTGCAAGTGAAGCGCTCCTCCGGCCTTTCACTAGTGAACGACCCACCT  
AGTCGCTTGCCCTCCGCTCTCGTCTGTTCTTCTGTTGTTACTGCCGGCCTTCATTGACATACATCCGGAC  
ACGCGTGCGATGTGGCGCGCTCTCGTTTTTCTTCGACCGGGTGCACGAG  
>lmaj\_29\_4\_up with T67333 1155435, 1155836  
CGACGTTCCCCCATCTCCTAGTCGTTACCCCTCTCAGCGAAGGTGTTACAGAGATGGAGAGAGACGAGAG  
GGTTGCGACGCTTGTGCGCCACCACCATCACCAGCCACTGATCCCCTGGCAACAGAGAAGGTTGACACC  
GGCGGTGTGCAAGCGGGTGCAGGGAAGAGTGGGTGGGGTGGGGTGGCGGCATTGTATGCGTGCTCTCTGC  
TACTCTTACCATCACCCCGTTACTCCTCCCTCTTCTCGATCTCTAACTTGTCTCCTGCCGACGCCGCGG  
CATCTCTGTGACACGCGGTGTCCTTTTCGTTCCGCGCTCTCTCTGGATTTCCATACACCATTCTGTCCAC  
CGCGTGTGTTGCTCTTGGGTGTTTCGTGCCGCGTATTGCTTTGCCACTCAG  
>lmaj\_29\_5\_up with T93344 537532, 537933  
TAGAGTTTGGCGTGCCACTGTTGCACGTATGTGTATAGAGCAGCCGCTCCTTTATCGGGGTGAATCCTCC  
AGTAATTTTGGCCACACAATGGCGCATGAGAACGAAAAGAAATGGCGACACACGGCTTTACTGTGAGACT  
TACCCTGTACAGCAGATGAAAAAGAGGAGAAAGAGATGAGCCAGCACAGGACAGCTTCTTTCCACATC  
CCCGCCTCTCTCCGCTCGCGTTGCGCGTGATTTTTTTCCACCTGACGCAACCCACTGCGACGCTCTCCGA  
GTCACCTGCTTTACAGAGCCGTTGGCTGATCCCGTTGCCGCGAAAAATCGTCTCTCCTCCACTCCCACGT  
CTCTCTCTCTCTCGCCCAATCTCTCAAACCGACCCCTTACCTAAAG  
>lmaj\_30\_12\_up with T93404 234389, 234790  
GCAAGCATCGAGGATACGCCCGGCCTATGTGGAAGTGTGAACTTGTCACTTTTCTTTTGTATCCTGAT  
TCTCTTGTAGTCACATATTTTATTAGCACTTGTGATCTTCACTGCGGTGTATCTGAAGACCCGAAACAG  
GAACCTGAGTAACTGCGGCAGCAAAGGCGAACGAATGCAGTTTCGAAAAACGTAATGCAGGTATT  
GAGTAGCAACGCAAGAAATACGAAGCCGGTCTTTACTTGTGTCGTTTTTGTCTGTGTTTTCACTATGG  
GAGCGAGATTCGACCACAGGGTACTGATTCATGACATCCTGGTGCAGTACTCGCTTGCTTCCATTTGCAC  
TCCCCTTCCACTTCCCTCGTGTGTGGCTTCCCTTTTTTTTTTGTCTCAG  
>lmaj\_30\_13\_up with W88286 1192477, 1192877  
GAGAGTTTTTCTTTGTTTTGCTTTACCTGCTAGGCAGAAATCTCTAGTACATTTTCTTTGTCATTGT  
TGCTGCCATTAAGCTTCGAGAAAGTCCATGAGTCACCCTGTAGCAAAAAAAAAAGCAAAAGTAAGCAAGCAC  
ACTTTGTCAAACACTGCTCTGTAAGCGGAGGGACCCCATGTCCCTCCGCTAGTTTCCATGCGCAGACG  
CATTACGTGGGTGAAATACCTCTTGTCTCCTGGTTTTTGTGTGGCTTGGAGACAGGTTTTGCAAGCTTTA  
TCTGCTCTGACCAGCCTTACTATCGATCTGCCTGAAAAGAAGCAGAATGATGCGCTATCGGCGCTTGCCT  
GAGAACGATATTCGCTTGACAGTGTCTTTTGCCTCTCCTTTCTTTGAAG  
>lmaj\_30\_15\_up with T67384 1248273, 1248674  
TTGCGACTTCACAAGAAACAAAAAAGACATGAACAACAGCAACAACGAGATGCGTGACGACTAAAGCTG

TTTGGACGTGCTGCCTGTCTCGACGGCTATGTTTTCGAGGTGCTTCGCCTCTTTTTGTGTTACGCCCAG  
CTTGATCTTGTAACCTCCTCGCCGACCTCATCGCATCATGTGGCGTCAAGAGCTAAACGAGACGGGACCT  
CTTCAAGAAAAGAGGGGGGGGGGGCTGGATCCGTGGCGGACGTGCGTGAGCTCTGACTATCGAGCCAC  
GTAGAGGCATGCTATGGAGCGCCTTTTTTTCCCATCTCTCTGGTCCCGTGAGTGATCCTCTCTACT  
TCACTCACCCACTCTCACTTGGCGCTCTGCGACACTACTCAACGAGGTAAG  
>lmaj\_30\_16\_up with T67381 605049, 605449  
TTTCTTCTCCCCACCACCACCACCACCACCACCACCATCACCACCAACAAAAACGCGAGATAC  
GAACCCTATCGATCCCCTTGTGCTTTGGACGCACAGCGTGGACGCTGTACACCGACAGTGACGCTTCTCA  
TCTACCGCGAGAAAAAACTCTGCAGAAAACGGGACGGCGCAGACAGGTGCTGTTGCACCCCTTGGCCAG  
TCTACATGTCAGGAGTGGTATGCGAATGGCGCAGTGTACGCTGCCACACGTCTAGTCAATACCCGAGCC  
ACGAATACGCGCCGGGATGGTGTGTGCCTTTTCGCTCTACCACTTGA CTCTGGCATGCACTTTGGCCA  
TCGGCTCTACCACCCACCCTTACCCATCTATGCCACATACGCATAG  
>lmaj\_30\_19\_up with AA125633 1259432, 1259832  
CTCTCTCCTTGTACGAGCGCTGTCGCTGCCGTGGCACCCTCAGCCCCGTCCCCTCTCTTTGTGCAGTCGC  
CGCTCCATACTTTGTTCTCTTTATTCCTTTAAAACGAAAAGTGCACGCTAAGAAAAACGAAAAGATTCCAC  
CGGCACGTAATCCCTCGCCCTCCCATCCCTCGCCGACTCAGTGTGACCGCCACTGCTGCTGCTGGTG  
TGGGCGTGCGGATATGTGTTGCACCCGCGTGTGTATGCGCGCACACCCTCGAGCTTTCTCTCGCTCGC  
TCGCTCTTTCCACTCTTGTGATCGAACAACGGCTGCGCTGCGCGCTCCCCGCACATTCCCCATGCGAT  
TATCTCACATGCTCACTCCCTTCTGGTATGCTCTCTTCCCCTCCACAG  
>lmaj\_30\_20\_up with W88369 181295, 181695  
TACTACACTGGCTTGGTGGAAACTCGGCGAGGGCATTTCGACGCTGACGACGAGGATCGCTAAGCAT  
TAGTCGCAAGGGTCTTCCCTGAGTAAACGTTACAGTGTGTGCGATGGGTTTTGCTTGAGTTGAAGAAACA  
TAAGCAAAGGTCTTCAGAAAGCGCGGACTTGAATATATGTGTGATTGACTCTGGGCACCAGCAGATCGC  
TCTTTTGTACACCGACGTCACACAAGCTGTTGCCCTCAGCCAACACGACCTCGTGCAGCGTTCTGCTCAT  
TCTTTTTCAACACGCTCCTGTGTGAATGACTATGAGCATTAAATGAATACCTCAATCTCCAGCTTCTCTGA  
TCTCCTCTGTGATCTTGTCTCCTCGTGCCCTTCACTCCCTGTCACAG  
>lmaj\_30\_21\_up with T93435 323548, 323948  
AAGCTTAATTGACATTCAAGCTTCGCACAAGTATTTTTCCCCACTCAAGGGTGTGTTATTGTTTTCTAC  
TTGATTGATGTACGCTCACAACAGCGCACCTCGTCTGAAAAGCACTTGATACTGTTCCCTTCTTTGCGAT  
ATGTTTCTATGAAAGAGCAACATTATTAGGTCACCTGTTTCGCGTGGGCGCACGCACTAGGGCTAT  
GAAGTTTTCGTTTCAATTGGCAATTCGTGCTCTGCTGAGGCAGCCGCTGTTTTGCTTGGTGCTCTTTTTCC  
TTTTGTTTCGACGCAGTGCATTCCGCTTCTCGCAGCAACCATTCTCCACTCTGTTTCTTCTCAACTGT  
CGTGCCTTCTATTCCCTCGATCTTTTCTCTGGATGCATGACAATTTCGCAG  
>lmaj\_30\_2\_up with W88408 1193484, 1193884  
CAGACGGGCTCAGCAAAACTGTGCATGGAACTCCATTCACTGCTGTGCTCACC GCGGCTGCATACGCAA  
AGGGCATCAAAGCACCTACAAAAGAAAAGTCTCTTTGTTTTTTGTGGTGGAGTGTCTCCGCGCACACCCAT  
TCAGGTCGGCACCTACGCTTTCGAATGGGGCCGCTTTGGTCGGCTTAGGTATTCGGTCCCTCCCTGAGAG  
TACTTGTATTGGTCACACAGAAAAGTAAAAAGAGCTCATTGGCGGACAGCGCTATCACTGCCTTCTGCA  
GCCGCAAAAAGCTACCGTGCGTTTGTGCTGCGTACGTGACACTAACGGATTACCGAGCTGTGCGTGTGTG  
TGGCGACGTGCTCCGCTACTACATCACGCGGGTGTGTTTTGTTTCGAAAG  
>lmaj\_30\_4\_up with T93408 644391, 644792  
TGGCTCATTGCTGCTAATCTGACTTTCTGATTCTAACCTTCTATCTGAAACACGCAAGAAAAGCCTGTAG  
GGCAAAGCGTATTACTACAGTTTTGCTGTCCTTCTACATTGCATGTACATGGACATTCATGTTTCTTTAC  
TGAAGCGAACCAAGAGCAGTTGTTTCGATAATTATGGGCTCGTTGGTGCCTCTGGGGCTCCGCGCTGAGCC  
TGATCGTATCCGCTGCTCGCATGGTTGTGTGACTACGTGCTTCCATTTGAATCCCTGCATTTGCGGGT

CCCACAGCTTGGGATCTAGCGTCTTCTCATCTCACGCATGCTCTAACTCTTTTCCCTCGCTGTCTTCCCT  
GCGCGCTCTCTCCTCCGCTGTGAGTCCTTCTTCGTGCCTACTTCCCTTAG

>lmaj\_30\_5\_up with W88349 347303, 347703

CAGGCCAGCGCACGTGACGTGGCGCTGTTTCATGCACACCGTGTGGTGACGCCGTAGTCTCGATGCCGGG  
GCAGAGGCACGAGCGCCTCAACTGATGCGGCGCATCGACCTTCTGATGACGCCCTTTGGGGAGAGATTGTC  
GGCTCTCACGATCAGTCGAGTGTGGGTGTGTATGCGCCTGCTGCTGCTTTTGAAGCGGGCTGCAGTGT  
GAGCGGAGACACACGCCTCATACTGCTGATCGCCCTTGCACGCTTCAAGCAGCTGCCGTGCCACGTCT  
CTCCTTAACAGCTGATGTCCTTCTCTCTATCGCCTTCTCTTTCTCCTCCATGCAACAACGGAAACGC  
CGCTGTTGGAATCTACGACCCTGCGTGCCTACACGAGCAGCACCCATAG

>lmaj\_30\_6\_up with T93433 322637, 323037

AACAACCGCTTGTGTCAGCAAGCAATTTGAAGGTAACACAATATCGCCTTTTCTTCTCACATGACATC  
GTTTGGTTATCAGAATTCGCTTTATGGTGGCACTGCGTTTGCCATGCGAACAGCACCAGCGACATGCAGT  
TCATTTTCAAACCTCGAAGTGCCGTTTGTATGGAGCGAAGGTGTAGGGCGCCTATTCTTCGGCACTTTTGA  
AAAAGAACCTATCTAGGTGTTGCAGCGAAGCGTCGCTAAAGCACTAGCGTTTCTGTCTAGATATGCGCTC  
TAGAGATCACACTATCGGAGGCAGATGTCTCTTGTCTGCACTTGCACACTGCTGTTTCTCAATCACTCT  
TTCCCTTACCCCTGCCTTTCTATTTTCATCTCGCACTATCCTTCCCGAAG

>lmaj\_30\_7\_up with W88335 180642, 181042

CCTCATGCTTTTCATGCACCCCTCCTTACTGACGGCAAGAACAGCTTCGGCGTTCTGAACATCTCTGGCA  
ATATGGATCTGATTTTCGATTCTCTCAGAAACGTCGCGCATTTTTTCACAGATTCTTTCAACTTCTACAGT  
GCGCGAAAAGAAGATGTGCTGTTTTTTTACACTCCAGTCAACAACCGGTTAAGCATTTCAGGCTTGAAA  
TACAGCCCAGTCCAGGGAGTGGCGCCGTCGTTTTTGGTGCAAAGCTGTACTGATTGTCCGATAAGAAAGGC  
AATCGTGCCGCATTTCATCACCGAGTCGTCAGCCGACTTTTCTCATGCTGGATCGTGTTGAAATCTTTTTT  
CCCCTTGTTCGCTCCTTTTCACTTTCTCATCTCTCTCATTCAACAG

>lmaj\_30\_9\_up with W88385 638889, 639290

TATAGCACACACACAGACGCACGCATACAGTAGTCAAAAACGAAACGCCCTAAAGCCAATCATTCCGTCG  
CCCTTCCCTGTGCTGCGGTGCGGTGCCTTTTCATCTGCCGCTTTATATTGCTGCCTTCGTGCGCCTCCTGT  
GTGCTGAAAGCGGCCGTAGTGGTGGCAAGGACGAGAGCGGCGGAGGGCGATGCGATTGCGGCCCCCC  
CCCCCCCCAAACACCCTTTCTTTTGTGTTAGAAGGATGAGGAGCGTAGCACGTCCCTCGATTCCG  
CCGGTGATGTGTGTGGGGTGGGGTGGGGGTCAGCGCAACAGTTGCACGACTATTCTCTCCTTCCCGTT  
GTCGTCTGCGCTTCTCTGTCTACGTTCTTTTGTGTTTTTCTTTTCAAG

>lmaj\_31\_10\_up with AA125628 1475189, 1475589

GGCTTGGGCTTCCGCTGCGTGGTGCCAGCGGCTTCGCCAAGGGACGGCGCGCCGCACCCAAGTCCGACAC  
CCCCACGAGCGAAGAGAACAATCTGCACGCGCACCAGCCCCAAGGAACGCCTCTCGCCACCGCGGTCTGT  
CACCGCGCCCCGAACAAACGCCAGCGTCGACAAAACATGTGCAGCGCTTCCCTGCCACCAATTTGTCCGA  
CGTCATTGGAGAATTCATTCTCAATCCAGCGGGCCGAGGGCAGAAAACGCTCTCTGCCCTTCTCACTTC  
ATCTTCTCGATATTCTTACCACGGCGGAACCTCCTGCCGCTCGCTTGTGCCCAAAAATGTCTCTCCCT  
GACCGAAACTCTTCTCATCGTTATTCTTTCTTTCTTTGCTCCGAAACAG

>lmaj\_31\_11\_up with AA060778 1150687, 1151087

TAAATGAGATGGGGTGCCTGTAAGGAGTGCCTGCATATATATATATATATGCGTACGTGTGCGTGTGTG  
CGCTATTGCGCAGTCGTGCTTCCGCTTGCACGGAACCCATGTGCTCTAGAAGTGAAACAGTTTGTGCT  
CGTAGTCACAGCTCCCTTCTCCGTTTTAGATTGTGAAGTACAGTCTCTCAGCACAGCCGCTACACTGCA  
AGATCTGCTGTGTGAGGCCTTGAAAACGAGCATAGGCACAAAGGAAAGGCAAAGGAATCCGCAGACCCT  
CTGATTGGCTGCTGAAGACGTTGTTTGTGAAGATTTTCTTCTTTCATCGTCATCTTTCTCGCATCGCTT  
CTTTCTCTTACTCTCGCATACCGCTCCACGTCCACCAACGCCGAG

>lmaj\_31\_12\_up with W88300 1042048, 1042448

TCTTTGGGTGTCTTAGTCGCAGAACACACAGCGATAACAGGTGGTCTCGTCTGCACGAACTCGGGGAAGG  
ACTACGATGGTTGGCGGGTGGGCAGTCTGCATCGCTGGCCTCTTCCTGGTTTGTGTGTCGCGTCTACACG  
CTCTCAAGGATCGTACGCAACGCGTGTGCTGACTGAACCTCAACAGCAGCAAGAGATGCTTTTAGGCCAC  
GCTGTTCTGCCACTCGGAGATGTCCCCCTTGAACCGAGCGACAGCAACGCTGCGCACGCTGTCTGTAT  
GACGAATGACGGCGCTCTGACTGATCTTGCAGTTTGCAGGGCAGACAGTGGCGTTGTCATTGCAGCAG  
TGCATCTGGCATTGTTGTTTACCCACTTGTCTCTCCTTTTTCTTAG  
>lmaj\_31\_13\_up with T67355 711379, 711779  
GGAGGTGATTGACAACCTGACTGGTGAAGAGGACGTGCGCTCCGGCCTTGGTGCAATGGGCGTGCTGACG  
GCTGGCCGCTTGGCCGCGCAGCAGCTTATGAGCACGGGCTGGTGTTCGCGCTAGCTCCGTTTCTCTCTG  
ACAGCAAGTATTGGTGAGTGTATCGATACATGTTTGAACCTTACGGCTGCAATAGTAAACAACGCCGAGT  
GCTTAAGCGGCAGACCCTCAGCGCCGCATCACGTGAGCATAAAAGCAACTTTGTGTGCGAGAGAAGACT  
TGATGTTCCCTTGGCCTGCTATTGGGTGTTTGAAGATCCGTGTGTCTGCGGTCTTGAGAGCCTACTTTAAT  
TCTACTCTTTCACTGTCCACGTCAATTGAAATGAGGCTTGCCTCGCAG  
>lmaj\_31\_14\_up with AA060755 966678, 967078  
GGAGTTTTCTGGAGAGCTCGGTTGTCTCATCGTTTGCATTGAGCGATGGACCCCTGTCTCACGTGCGCGG  
GGGAACGCACCGTGCTCGCATGGGCGCGTGTGCGGTGAGAAGCTACGTTGCTGGAGTGCAGCACGGGAG  
GTCTCGCTACCGCATCGATGTAAAGGAAACGTATGCGATGTGCGACTGCGTACTTTCCGGAGGGTTCCG  
ACTCGACCCCGATTGCCCTGCACGCCCGCAGTGTGGCTTCTCCTCCACTCTAACGAGCACCATCGCCCT  
TTCACATCCTTTTTCTTGCCTCCTGCATCCCCATGGCGAACAACCTCTCTGTTTCCGGTGAATGATGGCGC  
TTGCCTACTCTCCTTTGAGAACACCAACCATGACAACATGGAGGGCAAG  
>lmaj\_31\_15\_up with T93365 538244, 538644  
ACGGCGCACTCCACCTGCCAGCGACTCCAGTGTCTCATCGTTAGCAGAAAGGGGGTCTCTCGGTTTTGT  
TTGCTGTGTGCTCCCAGTGAGCTAACGTGACTATGGGAGGGGGCTCTACATGTCAAAACGCAACCTT  
TGCTGGGTCTTCCCCCCCCCTCGTGCTTCTTTGCTCGAGCTCACGCTCTCATGCGTTGAGACTCTTGC  
CGTCTCCCTTCCCACTCTCGCCCTCGCCCCGCTCGTGTCTTTCTATGTGTGCAACCTCGATGGGGTGTTC  
CCTCCACATACATACGCGGCATCAATGCGGACTCCTCCTCCTCCCTACACAAACGAATTACACGCATA  
TATATATACATATCTGTGTATATCCACAATCATGCGTACATGCCAAAG  
>lmaj\_31\_1\_up with W88344 118738, 119138  
GAGTGGCGGTTGTCTGCGTTCGGTGGGCCGTGCGCGTAGCGGTCGGGGATGCACGCATTCCCTGTGCCGT  
TGCTCCGAACATTCAAAAAAAGAGAGAGAGCTACAAGCATGCATTACAGCAGCCCTCACTTGGAGGGA  
TACGGCGCTGGCGGCCATCATGGGTGCCGCTTAGCTGTTGTCTTTCAACTCTGCAAGGCCGCTGGGTTT  
GCGCTTGCACACACGGCTGCCGCTGCGTGAAGTGAACACACGAATATCCGTTGTGCGGGAACCTGTGCC  
GTTTCGAGTGCCTCACTGCCGGCTCTCTCCTTCATCTTCTTCCGCTGCCACAATTTGCTTATGCTGCC  
CTTCTCATCCCCACCTTCTCTGCGGTTGTGTCTGAGGTGCTGGTCTGCTCAG  
>lmaj\_31\_2\_up with H64193 687808, 688208  
ACTGATCCCCACTGCAGCGTCCCTGCCTGCGCAACCACACATCTATCGGTGAACGAGGGATATGACCCT  
TCTTGGTGTCCACCTGTTGCTGTCTTCTTTTGTGTTACTGATCGTATTGCACCAAACCTGTGAATCCTCT  
GCCGATGAGTTACGCCGCTCACTCTTTCTTTGGGTTATTTGAGGGGAGGGGTTTGGAGCGTGCCTTTCT  
TCCTAAACTCGGTGCATGTGCTTGTGCCAGTGTCTTCTGATCAAGAAATCACCTGCATGTTCTCAGAAAA  
CGGTATCGGAGTGTGTCTCTCAATGCCCCCTCTGCCCTCACTTCCCGCTCTTGGCCCCGTTCCACCC  
CTCACCTCGACCCCTCCTCCTCCTCCCCCTCCACCTTGGCTCATTAG  
>lmaj\_31\_3\_up with T67363 12395, 12795  
ACTAGCGGCAGCAGACGTTTTTTATTACCACAGGCAGGTGTGCGGGATGGTGTGCTGCGGCTGTTGTTGAGA  
ACACGGTTCGTCAGTGTGCTGGTTCACCTCTTTCAAGGCGCTGCTTGTCTCCTCCGAGGGCGGTTTTT  
ACGGGTAAGGATGAAGGTATCCGCGCACATCCTCTTAACAGCTCCACGGTTGAAGTCAATCGACACGGAC

GCTGAGTTGCAATGCTTCTTGTAGCTGAAATGAAAGCCTTCTCCACTTACTGCTTACTGCCGCTCTCTTC  
TCTGTTGTGCTTCCCACATGGCAGGATTTTCAGCTCATCATTGTGACCCACACCATTTTGGCAACTCCCT  
GTATTTTGTGACCGAAATGAGCGCCTTCTCGTCTGTGCTCGGTGTGCCAG  
>lmaj\_31\_4\_up with T93387 147920, 148320  
AGAACACGGCGAAAGGTCAGCTGCGCAATACCGCGGCATGGCGGGTCCCACGACCCGCGACGGCGCAC  
TTCCCAAGGTCCTGCTTGTGATGAGCAGCGCGGGCTGCATTAGCTGAACAGAATAGAGGTGATGTGTTTT  
CGTCGCTGCCCTGCTCAAGCGCTTGAATTCCTTACGTACACGCACCGGCGCTCTATACTGCAGTTAT  
CTTCGAATGCTCACTATATATATACATATATGTGTGTGTGTTTTAGGAGGGGGCATGCTTATCCACT  
CGTCGCTCTACCCCTCCCTCTTCTCTTTCTCTTCGCGGTGTCCGTGCGCCACGCGGTCACAATTACC  
GTCCCCGGTATTGTGTTGCTTTCTCCGACCGCACTTTTCGTACTCCAAG  
>lmaj\_31\_5\_up with T93347 20074, 20474  
CGCGAACAAGAGTACACGATGGTGGTTCGTTCAAAGTGTCAAAGGGCGGTGCGCCTGAGGTGACACATGA  
CGATGTTGGCAGCTCACCGTCCATTTTCATGTACATAAAGCCCGCGGAGGAGTCAAACGACGCTTTGAA  
TTGTGCGTGGAAGAGCAGCTGACCATCCTCGAGCGCCTTCCATGGTGTTCCTCCGTAAGTGCACGCTCCAC  
ACACGCTGCTGTCTTGTGCGGGGTGTCGGTGACTTCTTCTTTCTTGTCCGCTTGTCTACTACCGCCC  
TGATGGGCAAGCCGCCCTACTAGCGCCACTAGGGCCTCCTCGTCCCTCTTGTGGAGAACAACAAGCCA  
CATGGTAACTCTCTCCTTCTCTGCTCTCTCCCTCCCTCTTGGTAGCTCAG  
>lmaj\_31\_6\_up with W88388 129442, 129842  
GCATGTCATGCACCTGTCTCTGTCCGAGGCATCTTTCACCCTAAACCACAACGAAAGCGACTGCCAC  
GCATTAGCGGTTTCGCTTCGCAAGCTACGATCGGCTCAGGCAGTGTCTTGTCTGTCAGGCCATAACCGTCA  
GTGCCCCCTCCCCCTCCCATACAATGCTCGCAGTGCATTTGCATGCACGAATAGCCGATTCTCGCCCAT  
CGCCGTGCTGCCTTCCCTTGTACCGCCGCTCTCTCTTTCTCGCGTTAGACATTGTGCATGTGGGCATT  
CATCCACACCAGTGCCTGCTCCGACTCCTTACGATACGGCCGCTTTCTCGCCTCCCGTGTACTCCC  
CTTCTCTCCCCCGCTTCTCGCTTCTCGCTGCTTCCCCGTGTGGACAG  
>lmaj\_31\_7\_up with AA060744 1273197, 1273597  
ACGCCAATCATGAAGGCGCTCCTCGCTCTTCCCTTGTGAGGCGACGATGAAGAATCGAAGGACGCCTGC  
GCCGCCGCTGTTGTGAATCCTCCTCCACAAGTGGGAGAGAGACACCGGCAGTGTCCGTGCCACTGCCT  
CCCTGGCTGCACATCTCTCCCGCGCCGCTCTTCTCCGTCCCAGTCTTTTCTCCCCCTCTGCATCC  
ACCCTCTGTTTCATCGTGACAGAGAGGTGTTCCCCGTTGAGGAAAAAGGAAAGTGGCGCAAAAATTGTC  
GCTCGGTTACGCAACAGCCAACCTCTCTCTCTCTCTCTCTCTCTCTCTCTCTCTGCGTGTGCGTGTGCC  
TCTCGAGGACGCTTCTCACTTACTCCCCTCCTCCCTCTCCTTCCGGTAG  
>lmaj\_31\_8\_up with T93420 861780, 862180  
CTTACGTACTGTGTCGTGATTGAACTCGAAAAGGGAAGGGCTATAGGCAGTGCAGGAGTGGCCTTGAAG  
GAGGCGGACATGCACGCGTTGCTTGGCCACGAAGCCGAGACGTGTGCGGTATGGTCTCTTTGAAGAGGTG  
CTATCCGTGCGCCTCAGATGGACTCATGGATGAAGCTGCGTCCGTGCTCTCAGTCCGCAGAGAGCAACC  
TCTGGCTCGTGTGCCTTTTCCCGTCTTGCTGTGTAGCGTGTGGAAGGTGGATCGGACGTGCATGTCTTG  
GTGTGCTTTTCTGTGTATGCTCTACAGCAGGGCTGCGCCTCTCTCGTCCCTTAATATCCTCGCCTTGCCT  
CCCCCTTCTTTATGGTTGGGTTGCTTTCTCGATCGCATTGCCATGGTAG  
>lmaj\_31\_9\_up with T97254 1061123, 1061523  
AAGTGTATAGAAAGACGAAGGGCAGCAGCCAAAGCGAAGCGTGATTAAGCGCCGCGGTATTCGCGAC  
GGCACTCCCTCACTCATCGGTTACGTCCTTCGAGCAGCCACCGCCTCAGCAGCACACCACCACCTA  
CCACCACTGTTGGGAGTCATAGCAGCAAAACAAGCATACTGCTTGGTTATCGGTATATCCCTTATA  
CCGTTGATCTCCAACCAAACCGTACACGGAGTTACAGGCACTCGAGATGGATACCCCTTGTACTACAG  
CTTCATCAGCTCTTCTCCCCCCCCCTACGCACACAGTTTTCCCTCTCTTAACATGCGAGCAACTGCCTT  
CACCCTTGTTTTCTTCTCTCTCTCACTCGCTCGCTCCCCTCTGGAAAG

>lmaj\_32\_10\_up with W88305 909439, 909839  
AGAGCGTGTGGTGTGTGCGTGTGTGTGGAGGGGACGACGGCGCAATCTCATGGAGCTGCACAGGCA  
ACGTGGTGTGCGTGTGCCATTCAGTACTGAGCTTCTCACCCGGCATTTCCTCAAGGCAGAGACACACGCAC  
ACACTGGTGTGTCGGTGGCAGTCGCGCATGGAACTGCGCCTTCACCGTTTCCCTTCGCGAGGCTCCG  
CACCTGGCCCCACGGCCACGGACTTCAACGTCCGCTTCCATGTAATTTCCCGCGACGCCCTTCCTGTGCC  
TGTTCACTACTCCCCTTCTGCTCTTTTCTTTTTACGGCGCATCTGTCATGCGGGATTTCGCACACCCATCA  
CCCGCCCTCTCTTTCAATCGACCCGCGCTCTCCGATGCGACCAACTCAG

>lmaj\_32\_11\_up with AA125627 1383073, 1383473  
TGTGGTGTATCTATTCTCAACTGCTGTTATCTCCGTTTGTCTTTCTGTAGAGAGACTCAAAGATAGTTT  
TTATTGCGCTTTGTTGTCCCTCTCTCTCCCTCGCCTTGTGTTAGTCATGGAGCCGAAAAAAAAAAAAACACA  
TACTTTCAATGTTAAGCACTTCTCTTCGTTTCTCAGGTGTGGGATTTTTTCGTCATCTCATCTGCTTGGCT  
GGGGTTATTGTAAGGCCACCCGTAGCTCTTCTCTGAGTTTTGCAAGGGTACTCATCGTACCAAAAAAAAA  
ATACGATGCGCTCCAGGTCGGTTTCTGAAGTCACTAATCGTATTACTTCATCCTATGCATCATTATCTTC  
CTTGCCAATATTATGCGTTCTAGAGTTTCTAAGCGCTGAAACTTCAAG

>lmaj\_32\_16\_up with AA125645 194753, 195154  
CAGCAAGGGAAGGGGAAAGGATGTTGGATGTGGTGTGTTCCCTCCAGTCAGCACCAGAGTGCCTGACA  
ACAGCCTCCCCTCTTTCTTTGTGATGAGAAGTACGGTCTGAGCGTCGCCTGTGCGTTGCACAGGAGA  
CATAGCCCCGCATATTATTGCCATCTCCGTGCGTGCGGTGCGCACTGGAAAACCGAGGCAGACTGGA  
ATACTTCGCAGCAAATGACAGTTATTATTTCTCGTTGTGGGGCAGTTGATACCGAATGACCGCTATTTT  
CGACGCCTTCATATCTTTCCATTTTTCTCATGCTCTTCTCCGTGCTTTCCCTTGCTCTTCCCGTGTTC  
ACGGCGTTGTGCTTTTCTGTTCAATGATCTCCCATCTGAACCGTTGCAG

>lmaj\_32\_19\_up with W88382 190160, 190561  
CGTTTTCACTTTCTTTTTTCCCATCGAGCGATGGAGAGCGGTATCAGCGGAGGCGTGATCTACCTCAC  
CCTCTGCCTCACGGATCGCCCATCTACCTCCGTACACGATCAAAATGAAAAGCAGCAGCACCGTTTTCCA  
TCTTCCCCACTCCCAGGCAAAAAGTGCGCAACAGTATTACACCTTTCCGGTGGTGTGCTGATCATTGAAAGCAA  
AGAGCGAACCTTGTGTACATGCAAAAAGCACATGAAGAGGACCGCATCCTTTGCTTAGCCTTGAAGTGCCG  
AACCTGTGATGAACTTTTGGAACTCAGTGCCCTCTACGCGCCCTCTTTTCACTTTCCCTGCGCTCCC  
ATTCTTGATTTGCGAACCATGCCGTTCTCTCTCCCGGTAGCATAACAG

>lmaj\_32\_1\_up with H64197 1283528, 1283929  
ATCGCGTCTCGCAACAACGAAAAAAGGAGTGGGATTTCAGATCGAAAAAGAGGGCTGTGCGCTGCGAT  
CGCTGCTGGGCGAGTCCCTCTGCTGGCTCTGCAGTCTTCCGTCCCTATCCACCCCATACCCCTCTCTCT  
CTCCATCGAGGAAGCTGCGGAGGCAAAACCACCTCACAAAACGTTAAGGCTCGGCGAACGTGTAATGGCA  
ACGCATCAGTGCAGCCGAGTCCCTGCATGAATCGACTGCGCTTCTCTTTGATTATCGTGGCCAGGTGCG  
CTAGCGGTTGATGTCGTATCCATCTCTCTGCCTTTCTCTCACTCTTCTCCGTGCTCTCCATCTTTACAC  
ACGTACGACGACACATCTGCATTTCTTGCTTTCTTTGTTTTCGAATCGCAG

>lmaj\_32\_20\_up with W88403 404291, 404691  
TGTGAAGTCGGTGTCTGGTCCGTTTCCGGGACAATGCTGGAGTTTGC CGAAGACTAGAAAAAGAGCATT  
CCATGGATACATTTCTTTTCCCTCGTCTTGCTACCAAAGCCGCGTGCTTTCCCTTAGAAGAGACTTTAA  
CGACAGTAAAATGGCAAGCGTGGCGCAGAAGCCACGGCGCAAGGTTTTCGTCTCTCTGTGCTCTCCTTCG  
CAGTGCCACAGGATCGGGTGACAGAGAGATGACATCCTCGGCAACGCTTACGCCCTGGCGGCCGCTTCA  
AATGAAAAGAGAAAAGAAATCGTTGTGAGCCTCGTATTGCCCTCCTTCCCTTGCTCTCGCGCAACTCCTTT  
GCTTTTCACTTCTTCACTGCCTCTTCAATGTTGACTTTGCCACTGCCAG

>lmaj\_32\_21\_up with W88378 474844, 475244  
TCTTCGCATCTGTGCGTGGTGGGCTGAACACCTTTAACCTCCCTCTTTCATGAGTCTTTCTCTTTGCC  
TTTTTTGCGGTTCCCCCTCTTGGGCGAGCTCTCACCTCACTCTGCCGCCCGATGCCTCTCCGTTTCT

CCGCGTCTGTTCCCTGCTTCGTCCCACCTCTCGCTTCCTTCTACCCGCATGGTACGCGTCTCGCCGTTCC  
TTGGGTCAATTTCTCCGGTGCCTGCGTTGCAGTACGCCCTTGTAGAGAAGGGTTTCTCTTACGTTGTTGGT  
CTCTCATTCCCTGTGCTGCACCCACGACTCCTCCTTGCCCCACTACTGCTCCTTCTCTTTGCTCTACCGT  
GCCTCCTGCCAACGCCCACTTCCTCCCCCTCCCCACGCTCACGCGCAG

>lmaj\_32\_22\_up with T93446 1383048, 1383448

ATGTCTCGCCTCGAAAATATGTGACTGTGGTGATCTATTCCTCAACTGCTGTTATCTCCGTTTGTTCCTT  
CTGTAGAGAGACTCAAAGATAGTTTTTATTGCGCTTTGTTGTCCCTCTCTCCTCGCCTTGTGTTAGTC  
ATGGAGCCGAAAAAAAAAACACATACTTTCAATGTTAAGCACTTCTCTTCGTTTCTCAGGTGTGGGAT  
TTTTCGTCATCTCATCTGCTTGGCTGGGGTTATTGTAAGGCCACCCGTAGCTCTTCTCTGAGTTTTGCA  
AGGGTACTCATCGTACCAAAAAAAAAATACGATGCGCTCCAGGTCGGTTTTCTGAAGTACTAATCGTATTA  
CTTCATCCTATGCATCATTATCTTCCTTGGCCAATATTCATGCGTTCTAG

>lmaj\_32\_23\_up with AA125646 1554104, 1554505

AAAATTCTAACCGTGGTGCTCGCGGTTTCATCCTTCTGGAAGGGACGCTATGTAGTATCGCAGTTGAGC  
GAATTGCTTTTCTCCTTCGGCGGAGCGGTGACGCTACCGATGGCTACCAAGGTCAGATGGACGGAGAGAA  
GGCAAGCACTGGATGTCCAATGTGTGCTCTGAGCATGTGACATCTCCACTTCTGTCTATGGCCACAAAGA  
AACTGGGGCAGAAGTCTAGTCGACAGCAGGGGGCTTGATTCTCTGTGCGTTGAAGCTCCCCCTCCCCC  
CGTGTGCGGGCTTCTTTTTGATGTCCCTTACCTCGTACACACAACCGACTCTGGTTGCTCATCGTTTCC  
CCTCACGAGGTTCTGCAAACCGTGGACCTTCTGCTATATCTCCTCTCAG

>lmaj\_32\_24\_up with AA060780 499421, 499822

TTGGCTGCCGTCGCGGGTGCCTGAGTATTTGCGTAAAAGGTAAGTCTGTTGTAGAGAGAGACCCGCCG  
AGCACAAAACCTCCAGAGATGCAGCACCATGGCTGAGAACGCAGTCTAGTATGCATGTGTAGGGAGTGCG  
TACCTCTGCCCATCCGTGTACAATTACAACGGCTCGCATGCCTGGTGTAGAGTTGAGGGATGTTCCCCGT  
TTCTCCTGCGTGACGAGGGCGATGTTGCCACTCATGCGAACACCCGCACGCTCTCGCGATTGTGCGGTT  
TTCATTCTCACTGGCCCTTCTCCCCCTCTCCCTCTAAACATGTTTTTTGCCACTTGACGCAAGTCAA  
AGGACTGTTTTCGGTTCTGGCGCACACGCGATGTCATCAGACATATCGCAG

>lmaj\_32\_25\_up with W88280 1383058, 1383458

TCGAAAATATGTGACTGTGGTGATCTATTCCTCAACTGCTGTTATCTCCGTTTGTTCCTTCTGTAGAGAG  
ACTCAAAGATAGTTTTTATTGCGCTTTGTTGTCCCTCTCTCCTCGCCTTGTGTTAGTCATGGAGCCGA  
AAAAAAAAAAAAACACATACTTTCAATGTTAAGCACTTCTCTTCGTTTCTCAGGTGTGGGATTTTTCGTCAT  
CTCATCTGCTTGGCTGGGGTTATTGTAAGGCCACCCGTAGCTCTTCTCTGAGTTTTGCAAGGGTACTCA  
TCGTACCAAAAAAAAAATACGATGCGCTCCAGGTCGGTTTTCTGAAGTACTAATCGTATTACTTCATCCTA  
TGCATCATTATCTTCCTTGGCCAATATTCATGCGTTCTAGAGTTTCTAAG

>lmaj\_32\_2\_up with T93413 425735, 426135

TGTGCATGGTCGTTCTTTGAAATCACCCTTGTGCTGCTTTGTTGCATTTAAGGTCAAGAGCTCCTGTTGT  
TAATGACCCGGGTTTTTGTGTTGCGTCTACAGATCGACTCTAGATACCTCTTCCCTCTTTTTCTTCTTCGT  
TGATGTATGCATACGCGGCTAAATCTGCTCTGGACATTCGCGGCAAACTGTGCCCTTGGCGGTGCGCCGTG  
GTCACATGGTTATCGGCCGTCTCGGTCTCTCTGTGTTGACACGCTACCCCTAACGATGCGTCTGCGTTG  
TTTATAATTGGCATGTATGTGGGACATTCTGTGACGCACACTGGATTTCGCACATACCCACGTTTCGACCAC  
ACGCACAAAACACACACACATACGACACTCTTTGCAACTTGCCGGGCATAG

>lmaj\_32\_5\_up with T67379 811705, 812105

TGTGTGTGAGCGACTAGCGTTGACTTGGTGACCTGCGCCACGCCCTATCCTCTTTACAGAGTGGTTGCC  
CCTCCCCCTTAGCAACAGTTCAGAGTCTGGGGTGTGGTGTGACAGTTTCCCGTGTGCTGAGGATGAT  
CCGGCTTCTCGGTTGCCGGTCTCTGTTGTGTATCTCTGTGCGTCTTTGCCACTGCTCTTGCTGATCACGG  
ATGGCAAGTGACAGTCGACGAAGGCAGGAGCTGGAAAACAAAGCCTTTCTTTTTGTTCTCTGCTCGTCCA  
GCACCGCGCGCACGCACATTTTTCTGACGTACATAACGTCGCTCTCCACTACCCCTCCAGTGGCACCAC



TTTCCTTCTCCGGATCGCTTTTTTCTCATGCCTGTCGTGAGTCGCTGGCAG  
>lmaj\_32\_6\_up with AA060760 1386218, 1386618  
GTCTGGCGCCGATCGCGCAGCACGTATCCGAGGAAGGACGAGAGGTGCCAGTAGAAGCATGGCTCAATG  
CAGCGACAGGACGGCTTGTCTAGACGAGCAGGGCTGAGCCGTGGCGCAGCAGAGGTAGGCGAACTGCCA  
TTGTGTGTGCGCATAGTTCTTGACTTGCTCGTGGCAGAATGGTCACGTGGACGAAAGAAAATTATTATTT  
GGTGCAGCAGTGGTGTGTGACTGTGGTTATGCAAAGGGGATGGCGTGTCTCGCTTGGAGCTCATGCCTTA  
GCAGTTATGTGCCGGTTCGGAGGATGCTTTTATGCACGTCACTGTCTCGTCTCGTAACTATCCCCCGTTTTTT  
TCTGTGCGACGACTGACGTGGTTCACATGCGCCACTGATATGCTTTTTGTAG  
>lmaj\_32\_7\_up with W88327 1507852, 1508252  
CTTACTCTAAAGAAAGCGATAAAAATGAAGAACAGAACGTATCTGGCGCCTGTGGAGATGTGCCATCCTCT  
TCACGTTGCGCCACTGTGACATCCTGCCCCCCCCCCCCGACACACACACGACAAGTGAGTGTGCTTGT  
GTGTACAGATGCTCTGCCGCCTTTGGTGGCTCCCGCTCTTGTGTCTTTTTGCTCTGCCGCGTTCACGGG  
CGGCACAAAACGCGACGCCTGCGTTCGGATGCCTTCCCTGCCAACTTTGCTTCTTTTTTATTCTGCACTT  
CCGATCCTCTGTGCCATTTCGCGTTCCTGACTTGCCCGTTTTCTTCCGCCCTTTTTTCATCCCCCTCTACA  
CGCTCTCCTCTACGCGGTTTGGTGTGCGGGCGGGACCGGCTGCCGAG  
>lmaj\_33\_10\_up with W88365 265496, 265897  
CTACGGTGGCACAGCGCACCAAGAGAGAGAGAGATCGCTGCTCAGGGGAGACTGATGGCAAACCGTA  
GTCAATAAAGACACCTGCTAATGTCTTATAGTACTATAAGATCGCGCATCGTTTCGGCGCCGCTTGCCA  
AATCCGCACTACTCAAGTCGATCGGGAGACATGTATCGGTTTCGATTGCGCTCCATGAAACCCCCCCTG  
AAGTTCTCAACGTTCTCCTCTGCGCGCCATGGCGAAAGGCGCATGTGCGCTAGCTAGACCCTCGCCGG  
GTACACGCAAATACATGTGAAGCAGCCCCACAGCTCTGATGGGCTGCATTGAACTTTCCCTATTATCC  
TTTTCTCCCTTCTTTCTTTTTTCATGATCGGTTGCATTCTTCCACCGAAAAG  
>lmaj\_33\_11\_up with AA060742 1561256, 1561657  
GCTTATGCACCACCACTGTTGTTGTTTGGCTCCTTCCCTGTGCGCATAGCACTTTTTCACACACAGATCGCG  
TCATAGACACACCAGCATAAAGCGTACATGTATAGGCGCATTTCGACGCGGGCCTTTGGCACGCCATGCAG  
TCACGCGCACGCTCACGGATACGTTGCTGCAAAGAGGACACTCGCGGCACAAAACACACACACACTTTC  
AGCGTGTGCTCTCTTAGGCTCAGCGTGCAAGCGCTCGCATGGTTTCTGCACACTCTGCCTCTCCAGATG  
GAAAGATGAGCGTGACAGCGACCAAGGCGGTGCCGTGCGCACTTGAACATCCTGGACTCTCTTCGATCT  
GCTACTGCCCATCTCTCTCGCCCTTCGCGCCTTTGTTTTGCCCGTTTTAG  
>lmaj\_33\_12\_up with T93463 1353502, 1353903  
CCCTCGACGTATCTAAGTACACACGTATGGCGCCCATACGCATTCTGTGCGATCTTACGTGTGCCGGGG  
TGCACCCAAAGGATGATGAGGTTTCATCGTCAGCGTTGAACACGGCCAGAACGACTCACTGCGTCAGGAAC  
CACGAGCTCACACGTAGTGGAGGAGTCCGCTGGATTGAGCGCGCTCAAGCATCGCAGCGTTTCCGGAGT  
ACAATGCCTTACATCTTTCTGCGGACTTGTAGCTCTCATCTTCCGCCGTTTTTTTTTTTTCTTTCGTGCCGC  
GTGGCTCTTTCTCCGTCTCTCGCTTTTCGCCTTCTTACCCAACGCACATCCGACATGCCGATGCTCATCG  
TTCCTTTTGGAGCGTTCGGCGACGTTTACGTTCGATCCTTCGACCGAGCAG  
>lmaj\_33\_13\_up with AA060741 818059, 818460  
ACATCCTTATACGCAGGCACGGCACGGATCATCTCCGATGAACAACGTTATTGAAAATGCCCTGCCGGGA  
GACACCCATCACACTTGTGCTCTGCGGGCTGATGGGGATGCTAGGCGTTATGTCTCGTCTGGAGGTGATT  
CATCCTCTCTACTTACTGCTAAGTCCGTCGTTAGTGTCAAAGAGCATCAGTACTGGCGCTGGTACCA  
ACTTCTCTACTTTGGTCCAATCAGCGCTCACTGCATCATGGAAATTCAGTGGATCTACCTCGTGAGCTC  
TTACTTGAAGCGCAGTATTACCACAGCGACCGCTTACTACATCTTCCCTACTCTTGATCATCGGCTGC  
TCGCTTTTGGGCTGCGGTTTTCTGTCGATTGTGAATGTGCCATACCTAAG  
>lmaj\_33\_14\_up with H64182 1470778, 1471178  
TGCCTACTGACATCGGTGGGCTAGCGATGCGCGGGAGCAGCGTGAATCATGCAGACGAGGGCAGTCGAT

AGCAAGCTCAGATGCACAGGGCTCCTGTGAGTAAGTCCCCGACTTACTCACACACCTTTGTTTTGTGCC  
TCTTCCCCACGCTGCAAGCGTACTTACAGATAAGCCATGGAGGAAGCATATAGCGATGCGATATCGAAGT  
CCCTAAGATACCGGAAAACGAAAAGCAAACGTCATGCGTCGTGTGAACTGGCGCAGGGGTGCACAACGG  
CGGCAGGGGAGGGGAGGGGAAGTTGAAGATGTGGTTTATCCTTGCTTGAGGCAGCTGCTCGTGTCAATCAT  
CCGCCTACGGATCTCTCCTCTTTATCTTTCGTGGCTGTGCTGCCCTACAG  
>lmaj\_33\_15\_up with AA125636 624851, 625252  
GTGGCCTCCACCTCCACGGCAGTAGTGACCGAACCTACGTGGGTTGTTCTAACGACGTGTGTTTCGTGCT  
CCTCCCTCTCTCTCGCGGCCCTTCGTGGGCTGTTGATCGCAGCCTAGAGTGAGGTCTGCTCCATGCTA  
GGGGCTGCCACACGTTGATGAGGTGGGGCTTGTGCACATGCCAGCGTGTGTGTGTGTGTGTGTGTGTGT  
TCTCCCTCTCTGCACCTCGAAGGCGAATGCGCTCGCGCATCCTCAAAGCCATTGCTTACACACGCACAC  
AACCTACTGTATTCTCCTTGAACCTAACTCCTTCTCTCCCTGCATTCTTTTCTCCTTTGCGGTGTC  
TCGCATATTTTGTGTCGCTCGCTTTGTGTTGTTGTTTGAACCTGTGAG  
>lmaj\_33\_16\_up with T93384 1545680, 1546081  
CACAGACTCGGATGCTGTCAGGTGTGGCGACCTTCCAACCATTCTCGCTCTACCAGCTCCATTTCGAAGA  
TAACGTAATGTGTGTACCGAATAAGCCGAAGGCTGCTTGAGGTTGGAAGAGGAAAACACACGCGAAGACGT  
GCTCAAGCGAGAGCCTTCGTTGCCGTTAGTCATTAGAGTGTCTTTGCAATCAAAGGAGACGAAATGGC  
GACGGGCAGGCACTGGGGTGAAGGTGTGTGCGCAGGATGCAGCTGTTGACGTGGCCCACTTCTCTCTCGC  
TCTTTCTGTGCTGGTGAATGCAGCAAGGCCAACACGGCAGCAGCACCTCGAAGGTTATTCTCTCCCTCC  
CGCTTATTTCAATCCCTCTCCTTCCCGCCTTCTTTTTGTGTGCATGCAG  
>lmaj\_33\_17\_up with W88363 605210, 605611  
GGACAATGCTGGACAGGATCGATTACAATGTAGACAAAGCATTGGTGAGCGCATCGAAAGCACAGATCGA  
ACTGGAAAGAGCTCGCGAGAATCAGAGCAGCTGCATTCTTATGTGACTTCCGCCCGTCCACTTTTGCCT  
ACCCCTGCTCAGCAAACCTGCACCACCATTTTGTTCCTATCCGTGCTTTTTCTCTCGTCGCACACAAA  
AGAAAACAATACAAAGCAGGTCCTCCGTGCCATCGGTGCAACTCGATCATGCTCTCATCTGTGCCGTAT  
CGTCGAACGAGTTTCTAGTTAGTTATTCTTCTCGTGCTCCCCACTTTTTCATTGCCCTTTCTCTGGCA  
ACGTCATTGTCTTTGCATAACCTACAATTTGCTCTCCGCTACCGTCAAAG  
>lmaj\_33\_2\_up with T67349 872058, 872459  
GCCGGGCCTTCTGAGCACTCGCTACAGCTTGCATGGACGGCACAGTATCCTCGGAGGCCAGAGAATGCG  
GCGACGGCGAGGTCGCTCCCATTGCCCCCTACCCCTCCACGTCCGCACCCCTTCTCTCCCATCTCTA  
CCTCCGACCTTGCCGGTGAAGGCTGGGATGGGGCGAGGTGGGAGGCCTGCTGCGTGCCTTTTCATGTTAG  
TGAGAATCTATCTCCTCTCTTTGTTTACTCCCCCTCGAACACACCCACACGTACACCTACACGAACAAA  
TCTGCGCGTCATCACTTCCACACGTTGCTTGCGCCGTCTCACCGTCGCGCACAACAACACTTACCATG  
CTCTCTGCTCGACAAAACCAACCTCCTGAACCTGTCACTTCTTTTCGCAG  
>lmaj\_33\_3\_up with T93351 850610, 851011  
CTCCAATAAGGACGAATGAAGCAGCAGACGGTATGCTTGAGGAGAGAGATAGAGGACACATCGTTGGCAG  
AGCACTGGAGCAGGGGTGGGCTTCAAAGGCGGGCGATAAGGTCCCCACAGCGCAACGGCGATGTTTTTG  
TCGCTTCTTTGCACCGCCCCTTCCCTCTCCTCCTCCTCCTCCTGCTTTCTCTCTCCAGACACAAGG  
GTGTGAACTAAGGGCGCGCTGGTGTACGAGCGGACGGCACTGCCGCACTTCTCTTACCGTTGTCCA  
CTCCTTTTCGCGCACGGCCGCGGGGCTTCTCCGTTGCGTTTTCTATACTTCTTCTTCTCCTCTCCTCGCCT  
TCCTTTCTGCCTGTCTCCTTGCCCACTGCTTCGCCTGAAATCGGCAAAAG  
>lmaj\_33\_5\_up with AA060782 1320269, 1320669  
TCTATGTCAAGCAAGCATCAATGGCAAATATACGTGAAGAGCTGAATTTTGTGCGTGGTCTGAGGCTGCT  
GCAGTGTGGACTGAAATCATTGTTGAGTGCTCACCTGATAGTTGTGAGTGGGGAGTGAGTTGTTTTGA  
AATAGGACAGTGAAGAGGCCACCAGAGCGTGGATGTTCTTTCGTTACCTGGCGCGGGACATGCGAA  
ACGGCAACGTAACCTGTGTGTCGGTTTTCTGTCTCTGCTTTCAAAGCAGCTCACAGCTTTTAGTCTG

TATAGCCGCTTGTGGCTTCCATCTGGAGTCATTCTGAACGAAGACGATTTCTTTTTTCGGTATTCACTCTC  
TCTCTGTCTTGCTTTCTTGTCGCTTTATTCACTCTGTCGTCTCTTCACAG

>lmaj\_33\_9\_up with T97247 267148, 267549

TGCAAAGAGCGATCATGAGCGCATCATCGTCGACATGCTGCGTGGAAGTTGCTCATCGTGGGTGAAAACG  
TTGCAGTTTTTTAGATCATAAGCAATCACCGCGCAACATATTGAAACCACCCTTATACACAGCGAGCAA  
CTGATTGCTTTAGCGAAGCACAATTCACCAGCTGTCGTGTTTCTTATAAATGCCAAGAACTGTACTAGAA  
GAAAATTGAAAAGGTAATGGCAGCAGCATTGGCGCTGTCGCTTTTTCTACCAGTCATGTTCTACGACGCC  
TTGCTGACAACCACCAACAGAGCACTTGACCATGGCGTTCGTGAGTGTTTCATGAGATGGCTCTTCCCAC  
TTTTCTCCCGCTTACGTTTCCCGCCTTTTTACTGATGTGATTGTGTCTAG

>lmaj\_34\_10\_up with W88383 47532, 47933

TGAGTTGTCGTTTCGTTTCATCCGTTGGGGGAGAGCCGGAGTGCAACGCAAAGTGTCTGCCACACACACACA  
CACACACACGCACGCGCAACGCTTTGAAAGACTCGCGCACAGATGTCGCCACGACGCTGATGCGAAGGA  
GTCGGTGTAGACGTGTGACAGGCCGCGCGGAAAACGGATGAAGATAAATGCTTGCTCCACACCTCATG  
AGCACTGTGCATAGCCATCCAAGAGAGCGCTAAGAAGATGCTTTCCTTCGGAAGCACACAGGTGTTTGCC  
GCTGCCTCCGTCTATCGGTGTAAGCGCCTGTGCTTCAGCATGTTTTATGCGGAAGCACTTGTGATGCGGG  
CATGATCTCTTCCCCCCCCCTCTTTCTTTGTTTTGATCATCCCTCCATAG

>lmaj\_34\_11\_up with W88257 1506991, 1507392

ACTGAGTAAAACCCGAAGAGACAAAACGACAAGCGGCCTACTCTGCATGGCATGTGGCTGTTTCTCTC  
CGCCTTCCCCCTCTCTTCAGCCATCGGCCCGCACGCATGCGCACGGGAGCCGGTTTTGCCGCTGTAGAGG  
TGCTTTAGTTGCTTTTTTGTCTCTGCCGAGTCGTTTTCAACTAGGGCCGAGGCGTGCCCGCTCGTGCCTG  
AAGCCTTTTCTTTGCTCCCCATCTTGTGTACGTTTCCCATGCCACAAGACTTTTCTGGGCGTTGCTGTGG  
CCCTGCCACACACACACACACACACACCGGTAACGCGACCTGACTTTCCCGACTTCTCCCTCTCGCTTTT  
TCCTGCTCCTCGTCTCTATATGAGCGGCCTCTCGGCCACCACACCAACAG

>lmaj\_34\_12\_up with W88351 759971, 760371

GGTACGACACACCGCTACGGCGGCTGGTGCTCCTCCTTTTTGTTGCGGACCGTTTTCCGGCACCCTTTT  
ACGACTCCGCTAAGCGGTGTGCTTTTTTGTGATATTTCCCCTCCCTGGCTGCCAGGACGCCATGCTGGT  
TGTGGAGCGAGTCGTTCTCCAATCCTGCGCCTTCTCATCCGCCTTATCCCTCCTCCCTCCATCATCG  
TTATCGCCTCTTTCAGTTCTCGGTGTGGCATAACATGCGTCCGGCTGGCCTCTTCTCTTTCATCCG  
CTTGCGCATGCGGCTCCCCACATTGCTGATGACCTCTCTCTCCCCCACACCCCTCACACGCGATCAC  
CAACTCGGACCCCTTGCTTACATTCGCCACCATCGACCACGCGACGAAAG

>lmaj\_34\_1\_up with W88295 194008, 194409

TAGGGGGTCCATCTCACTGCGTACTCCATGTGAAATAAACAAGGCATGAATGCGCACGTGGCTTAGAG  
TTGTCTGCTGTGTTGTTGCTTAGGTAGCCTTGGCGGACATCGTCATGGCATCGGTGCTCGCTCATAAACA  
GGAGAGACAGACCGGCACTGTGTGTACACACTTGTGGTTGGCCACCTCTCCATCCATCTGCCTCTCTCG  
TTGAGAAATACCGCTACCTTATGCAGAGCCCCTTTTGGTGCTTTCACGGCACGTTGGTGCACGGCTCTGCT  
CCCCTGAGCGCCCAACGCGTCGCACCTTCTCCACTCTCTCGAAAGGCAGCCATGGATTCTGTCTCTCTC  
TCTCTCTCTCGTTACTTCCGCCTTCGTCCGCAATCATCGCCCTCTGTCAG

>lmaj\_34\_2\_up with T93357 867561, 867961

CCATGCGTAGTGTAGGACGAGCAACCAGAGCCAAACAAAGTCGCGGACCGGTGAGAGCTATTGCTGTTCC  
GTGGACCGACCTGGTGTGCGTGAAAAGCCGGCCTGCGTGGCCTCTGTGGTCTCTTTCCAGCCCCGATGG  
ACTGCTGGGGGGGGGACAGCTGTGAGCGCCTGCGTGGCCCTGCCTTTTTTTCGTTTTTTCGATGCTTCTTT  
TCCTCCGTCTCTGCCCCACACCCTTCTCCCGCACCCCTCGTATTCTCCCTCTGTTCTCTCTCTCGGCA  
TTGTTGCGGTGTTACAGAGCGTGCTTTCGTGTGGCGGTCTTTGTGGGGTTGCCACGCACCTCCTCTTGG  
CTGCTCGTGGTGGCAGCACCACCGCCCTTTCCCGCTATCCTGCTTCTTAG

>lmaj\_34\_3\_up with W88347 49052, 49453

GGTTTCGCGTGCGCGGCTATATTTTTATTTTCTTGTTTTCTTGTGTTGAGGCTGTATACCAAACACACACA  
CACAAAAAACAACGCACCGCGAAGAGAAGTAAAGGGGATCGACAATGACCTGTGCGACAGACGACA  
CACAGACTGCGTCGTGTGCTCTTCTGCTTGTGCGTGGCCGCCCTTCCCCCTTGTGCTTCTCAGCCGC  
CACCGCTCCCTGTTCTCACTATCTGTCTGTCTCGCTCTCTGCGAGCTATCCGTGCGCGTATTTTCGATCAC  
TCTTTTCTATTATGTTCTTGCACATTAGTACACAAGCGCTCTGTGCTTTGTAGTTATCATCTTTCGCGTCT  
GGCGTGTGAAACATCTCTGTCTCGCCGATGACCTCCACCACCGCACAG

>lmaj\_34\_4\_up with W88281 738051, 738451

ACTGCGCAGGTGAGTGCATGTGTGCGTGTCTGTGCCACTCCCTCGCGTTCACCGCGAGGGAAGGCGAGCT  
GGATGGGCACTGCAATGGAAGTGTGGTGGCGGTGTAGGTGACTCGAAAACTGTGAGAGGCGTGACAAAA  
TGCATCCTTTTTATCCAAGTGTCTCGGTGAAACGATCGAGCCAAAACCGCTTGTACGCTCATCATCCCTCC  
CTTTCTCCTGCAGGGAGAAGCACCTTTGGGTTGCTGTGCCGTCTCCATGCGGGAACGATGTTGTCTGTGCG  
CTTCATCGTCCGCCACCTCCACCATGTCCCTTGCTTGTTCACACGAGTGTGCGGTTCTGATTTTC  
TGCTTCTGTAATCTTTCTCCCGCCCTCTGTGAGTTGTGACACGGTGAAG

>lmaj\_34\_5\_up with T93475 425889, 426290

TTGCAATCCTAGTAGATTGTGTCCCTCTCTTCTTCCCTTCGCACCCCTCCTTTGACCTGCACCCGCGAATC  
CAACCACTGAGGAGCGAGTGGCCAGCTCATGCATCCATGTTCCCTTAGCTTCCGCCACCTCGAGCTGACTA  
CTTATCCAGCTTCTCATGCCGATACACAGCCAAGCGCTAGCTTCTCGCTTTTATTTTCTGCGCCCTCTCT  
CCGCTCCGCTCCTCCGATGACCTGCATTACCCTGGCTATCAAACTCAACCATGAAATGTAACACTTATA  
CTTGATGCACGCTTTTTTATTTGACATCGTTTTCGTTGCTGCTCCGAACGCGCTTTGGGATTACGGAA  
ACATGCACGCACACATGCATGCATGCCTATACACACGCCACAAAG

>lmaj\_34\_6\_up with T67400 1635313, 1635714

TCATGGCGATCGCGATGCGCGACTGCGTCAGCGCGCTGTTTGTGGAGGATTTCTTTCGCGTCTTTGG  
CAGGGCTTGCCTCCTTCTTGCTTTTCGTGCGCCGACCACCTCTCTCTGCTCCCTCGCATAGGGGGAAT  
GACGTGCATAAATGCTGCCCTTCTGCTACTTTCGCTCCGCTCTTTCGCATCCATTTGTGGTTGCTGC  
GTGCTTCTCCGCTTTGCAAGAGCGAAAAGGACCTTCCCCTAGAACAGCTGCACTGAGTTGGATCAGCA  
ATCGCGAGAAAAGTGGCAGGACGATAACCGTACCAGTGGGCGTCTTGTGTTTCTGTGCAGAGGTCGGCC  
TGCTCCACCCGCTTCACTGCTCTTTTTTGTTCCTCCTCATCTATTTTCAG

>lmaj\_34\_7\_up with AA060747 1557685, 1558086

ACTGCACTGTCCCCGTGCTCCTCGACCTCTTGCCTTCTTATCAAAAGACGAGAAAACACGCTATCGCCACCG  
ATGCAGGTGTGCTACCACACTGGAGAGTGAAGCAGAGAGTGGGAAGGTGCAGCGCAACCGTTGCC  
CCGATTTCTCCTTCTAATGCTTACACAGTTTGTCTTTTCTTCCCGAGCCGTTTGTGCGGTGCCCGTTGAGG  
AGCCACTTGCAGGCTATGCATGCTGCTATCCAGTCGCCACATCATCGTTTCGGCCATACCGTGCCCTGTC  
TTTTTGTGTTCTCCGACTATGCGCACATCAACACTCCGTACCTGCCCTTCAACACTGCTACTGAAAACA  
ACACAAACGCCCGTTCTCTGCCCCCTTTTCGCCCACGCACGTACGCGCAG

>lmaj\_34\_8\_up with AA125623 938279, 938679

TGCGAGTTATCGCTGCACCTGCCAGCCCACCGCGGTTCTTCTTCGGCTTTTCCACAAACACGCTCTCT  
CTATTTGTGCTGTGTTTGCCTGCGGCCTTGATCCCGGTACTCGCGTTTTCGTTGCTGCTGTGCTCG  
CTGCGTTCCGCTTCTTCGACGTGGGATGGGCGCCTGCTCCTATACGCTGACCTGACGATGTGCGTACA  
AGCACATCTCCCTGGGTGCTGTGCTGCTAGGAAAGTGGTTGTAGGACTGCGTATTTGTCCCATAGCTT  
TACCCTGTGTAGCTCCACCTTCTCACCTAGCTGCGCTCTCGACCTGTGCATGTTGAGTTTCTGTGAT  
CGCCACCCACCCCTCCCCCTCTGCCCCGCTTTTTTCTCTATTTCAG

>lmaj\_34\_9\_up with T93388 1213993, 1214393

ACAGGAGAGAGGTGCGTGCATATGGCTGACCAGCAACGAGCACACGAGACGATGCTGCGAGGTGAGT  
CTTGTGATTTCGAGGACCAGTGCTTTCTCTGGTTCGTTTTCTTCTCGTTAGGTTTGTGCTCATCAGTGG  
TCTGGTGAATGCGCTTCTTCAACGAGTGATGCATCATTTTCTTTCACGCCAAGGCCACAAAGCAAGG

CGGTTGATACACGGACTTGTACTTGCCTCCTCCGACGCACGCGCACGCGCTGCAGGCGAAGCTGACGGAT  
AAGATGCTGATTCCGCGGACCAGGGTATCAGTCCTCGCGTCTCTCTCCATTTTCCCTCTACCTCACGGCA  
ACTCTTTTTTTTCTTGTGCTGCTCTCATACTCTCGCCTGTCAACCCAAG  
>lmaj\_35\_11\_up with AA060750 880634, 881035  
CAACTTGATTGCAACCACAGAAATTACCGCCATTACAAATTTTTACAATAAAGACCAATGGGACCGCAGA  
TGAACGCTTGTGTTGAAGACAGCGAAGAGTATTGAAATGCGTGTCTGTCAATCTGATGTTGCTGTGTGCGG  
AACACTTTTTCGTGCCATGGAGGACTGTGCGGCTTCGCGGAGGCAGCATGCATAGTTCTGTTTCTTTTTC  
TGCGCAGCATCCAGTAACTGGGGGCTACACAAGGACGAACTCGACCTTGCAAACGCTTCTAAGCGACAGT  
CATATTCTCCCTTCGTTTTTCTTTCTTTGTGTCTGTGCTGCACTTGATGCTCTCGTATCAACCGAATA  
CACACGCACAAATCTTTTTTGTCTGTGAGTCGTCTTCGACGCGCCTCAG  
>lmaj\_35\_15\_up with AA125648 752374, 752774  
AGGAGGGGGAGGAACACTTGCGCATGTGCAAGGCTATTCATAGGTGGTGTGCGACTACCGAAACAGGAAAA  
GCAAAGGAAGGAAGATCGAGGGAGGTGTAGATCGCACCGTTGCTCTTGCGGTAAGTTCGCGCTGTTTTCTG  
TGCACCAGCTACTCTGGTCTGCGCAACTGGTCAATGTGGATACTTGCATAGCTAGGACCCAGAGGAGGG  
TCATGGGGATGTGGGCTGTAGCTAGCAGGCACGTGCGCCATGCCCCGGTAAAAATCTCTCCGCATCCTGT  
ATTTGCGTATTGTGACTTCCTCATCCTGCACCAAGCACTTCCGCATGCCACTCTTCGGCTGTTTTCTCTCC  
GCCTGTTGCCCTCTGCTTCGTTGCGGTCTCCTCGTTTTTTTTTTTTTGGTAG  
>lmaj\_35\_17\_up with W88414 572268, 572669  
CCTCCCCACACAGAGTGGTTGTGCTGGACCCTCAGATGCCATACTGAGGTGTCCCCCGTCATGAGGAGCT  
GATGAAAAACACAAAAAAGATGAAGGCGGGGAGGGGAAAGGCAGAGGAGGCGCGTCCGAGAGGGTGACA  
TGGACTGACGTCCCGTATGCTCCGGTATATTGCTTTCCAGAGCCCCCCCAGCTCCCAACCTTTTCTCTT  
CCTCGTCTTTCTAGATCCTCCAAACTTCGTCCGCCCTTCTCCATGTTTCCCTCTCCCTTCGCCTCTTTC  
GTGCTTATTTTTTTACTCCCTGCGCGGTTTTCTCACCCATCGATCACCACCACGCGTTATGCTTGCTCTT  
ACGTCGCCACGCCCCCTCCTCCGACACCACCCTACTTGTTTTTGTTGGCCAG  
>lmaj\_35\_18\_up with T93457 780958, 781359  
CGGGGGAGGCGTGCCCGTTTCGGTCTCTTCTCTGCTTCTGCCCCTGTGCACCACTTGTACGCTGGCAC  
GCGAGTGCAGGCGGTTTCGGTGTCTCGTGATTTGTACCCGCTGTTCTCCTCCTTTAACTCTTTCCTTAC  
CCTCATTCTCTATCGCTGCATCGTGATGCTTTGTTTCCCCTCCACTCCTCGCGTGCCTATCACTGCA  
CTCTACGCGCACCTACACACATGCGTATCTTGTACGCTCACCCACCTGGCGTTACCGGCGTGCCGCCTCA  
TCGCCGCAACCTCCGCTGCGTCCGTGCGTCCGCTGGACTGGCTCTGCAACGAACTGTCATCATCGACCC  
CCCCCCCCCCCCAAAAAACGAACACTACAACACTTCGCCAAG  
>lmaj\_35\_19\_up with T67394 1853567, 1853968  
AAAGGCAAAGCGGAGCTGGTCGCGAGGAAAGGCAACCAAGGCCAGGATCAGCGCCTCGCCGGGGCGGGG  
GGCGCACATCCGCCAGCCGACCGAAACCGTCCGCGAAAATGCGCCGCACACAAAAGCACGCGCATGTTT  
TTTTTTTTTTCCTGAAGCTAGGTGTAACCGGAACGATCTGCCGAGGACCGATCTCATTACACAGCAGCT  
AAGAGTCTAAAAACAAACGTAAGGCGCCTCCAAGCATCAGCCAAACACCATGATGCACAGCTTTTCGC  
ATATTGGCAAGTGTGCTGCTGCGCAGAACTGTGTTTGAAGTCCGGAAGTTTTCTCTATTCTCTGCTC  
CATTTTCCCTTCTCTCCACACAGCTCTTCTGCAAACGTCCTGCTTACAG  
>lmaj\_35\_1\_up with AA125620 1744610, 1745011  
TCCCTTGTGCTTCAAAGTTTGCCATCTTGCTGTCTATGATGTACAGACAATAGTGGCGTGCAACATCCTC  
TCACCACCGCTGAGAAAGTCGAAAGGCATGCATGCGTGCCTCGCAGCCAGACATGCGGAGACGTCAAGCT  
CTGCACACATGGGGGCGCTCGCCTCGCCTTGAAGTGCCTAGCAGAGAGATACCGAACGTGCGTGCCAGA  
TCCGCGACGGAGATTGTCAGAGCACTGCGCTGCGCACTGCGCTCCGAAAGGCAAGAAGACGGTTTTCCGTC  
TGCCACAAGTGTTCATGGGCAGCAAAGAAAAAGAAAGCAAATGGCAGCGCAACCGCCGACACGCATGC  
GAACTTCTTTCCCTCCACTTCTTGTGCTGCTTGCCTCATTGCGTCAG

>lmaj\_35\_20\_up with AA125630 594130, 594531  
CCCACAGCTGCTCTCGCTTGTGGCTCGACCCCACGCGGTGACACATGAGACCTTTGGTCAAATCTGCAA  
AGTATGGCCAGCGGAAGGTAAGCGGTGGTGTGGTTGTTGTCTTGGTTGCCGGATGGCCGGTAGTACTG  
CTACCCGAGCCATTCGGGGAGCAGTACTACGCAACTCCCGTGCTTCTGCGTCTCCTCCCTCTGTGCACCC  
CCTCGAACTCACGCTCGTTCGGCTTACCTGGAACGTCCTCGCCGCCACCTCCTCAGCTGTGATGGTCCC  
TGTGCACTGCTCATATGATACCCTCCTCCTCCGCTTCTTTTTCTCGCGTGTGCGCTCTCTCCCTTC  
TCCCCAAAATAATATACACTCGCTTGCACACACGCACAAACCATTGCAG

>lmaj\_35\_21\_up with AA060753 1638732, 1639133  
ATCACCGAAAGGACCTCCAGCGAAAAGGATCCGTATAGGTGCGGTTTCGCTCTGTGAACGCGAAGTCGG  
GTGTGCTATTTCATGCTCCACCCCTCTACCCCACTGCAACCATGCCGCTTTCTCCACTCCCTCAAAGCTG  
AATCCAACGTGCTGGTTCGCTGCAGCTGTCAGAGGACGCGTGGGAATGGGGAGGGAGGGAGGGG  
GGAAGGGGGGGCGCCATCGGCTGCAGCACGGCGCACCCGCTCACCATTGATGATCGTCTCGGCTCTTTT  
CCTCCTCAAACCTCTCTTTCCCATATTCGTTTTCGTTGCTTCTCTACACGACTTGTGGTCCCTCTC  
GAGCATGAGGTACCCCTTCCATCCATCTGGGCACACTCTGCTAACACCAG

>lmaj\_35\_22\_up with T93458 1714365, 1714766  
ATACGACCGCGTGTGTGCGGTAGAAAATAGCCACACCTCGAACCGGAAAACGAAAAGACGAACAGAGTAC  
TAGAATGCTGAAGGGGCTTCTTGGTTACCTGACGAAGGACTTGTGCGCGCAAGTCTCGCGGGTCTGTTTT  
TCTCTTAATCGCGAGACAATGACAAGAGATACGCGCGCTGGAGGAGTCGGAGAGGGCAACCACGTACTAA  
CACCGGCGCTTGCCATTTATACCGTGGCCACCGTGCACGCTGTTGCGACAGCGGTCTACACGCTCTTTGA  
TGTTTTTGGAAACAGGGCAGCTTTGTGCCCCCTCCCCCTTTTCGGACGGTTTGACTACTCCGCTTCTT  
CTACAGACACTCGCTCAATGCTTACTCTTCGTCTCTCCTCGCATGCCAAG

>lmaj\_35\_23\_up with T67337 561306, 561706  
TGTTTTGATCAAAGCTTACCATGGCAGGGTCGTCGACGGGCGCAACTGCTTCTCTGCCCGTCCTTGGTGAG  
CGCGCATTACCGTGAATCGCACGCCCTTGCCTGGGTTTCATTTTTCGACCACGCCGCTACCTACAAGCTT  
GTTTTGGCCTGGACGAAAACAGCTGGGCTCTGAGTCTGCACATGATGCTCACAACCTTTTCCACTCTCT  
CCTGCACCTGACGCATCACGTCGTTTGGCGCCTCATTTTTGCGTGATGTGCCTTGTGGTTCTCACGCTC  
TCGGCCTGTTGCTGCACTGTTTACTCAGTATCTATTCTACCTCACACGTCCAGACACCTCAACCTACCCC  
ATCTCTCTCCCTCGCCGCTACACTCCACTTCTCTCTCACACACTCAAG

>lmaj\_35\_25\_up with T97246 850355, 850756  
TGTAAGAACAGCAGCAGTGGCAACAATACTGCGCCTCCTCGCTCCTCTAACAAGACCTTTTCGACCTGAAA  
ACGTGCGCGCAGCCGCTTAGTGAGCGACTGTGCTGTGGTGGTGCCACCATTTGTATGCGTACCGGGGAG  
GAAAAGACGTGTGATGCGTTACCGCCACATCATTGACCCCGAGCTGCCATGAACCTGTCCAGAGCTGTG  
GCACACGAATGTGTTGCGGTGCGACCGGATAGCAGCGAGAGAAGGCGAAGACCAGACAACCACAAAAGC  
AGCTGCTCCTATGATTGCCACTCTTCTGTTTTTCTTTTCTTTTGGCTCAACCGTTTCAGTTTTCTTCTC  
TTAATGGTGTGCGATGACATCCCTCCAGCTCCACACGCACATGCACACAG

>lmaj\_35\_26\_up with W88407 1355308, 1355708  
GGCTTTCTGTTTTCTTTGAGTCTCCATTGCTACCAGCTTCTTTGAAGCGGCAGGTGGTGAGGGAGGGGT  
ATAACAGAGCGAACTTGTGCAACGCATGCTGTTTTCTGTACAAGGTTATTGACAGCTGCTGTGAGGTGG  
CTCGCTGAGCTACTTTTTCGTCCCGTCTGTATCGTTCGGTTTTCCCCATTGAGAGAAAAACATACTGATGT  
GTGCCTGCTGGAAGTGTGAAAGAGCTTGACAGTGTAACTGCTCTTCTTGGAGTGTCTGCCTCGCTTTA  
TACAAGCGTCTCGATGTGCTCTCTGCTTGCATCCCCATCCTTTTTGTACTCTTTTCTCTCTATAACATCT  
TTGCCTACGTGTTCTTGCGCCATTGCGTTTTCTTTTCATGGATCTTTTCAG

>lmaj\_35\_27\_up with H64188 1854096, 1854497  
GCTCGGGGGCGAGGGCGGGTGAGTTTCAGCACATCTTGAACATGTCCAAAATTCCAGCCCAAGTGGAGCAA  
AAGCTGCGTCCGGCGATGGATCCTGGTGTGAGCTTTCACCTATCAAGATTCGCGCATTTTTGTGCGCGCTC

GCCCCGATCGTTCGCACATGATATGGAAGACCCAAACAATCAGAGCATTGTGCAGAAAGTCGAAGAAAACAG  
AGACCTCGTTCGTGATGACGCCAAAGATATCACTTTCTGGCGAGTGCACAATTGATCCGTGCGTTGTCAAT  
CTTGACGGCGTGTGTTGTGGGCGCCCGTGACGATACAGAGCGAGTTTACCTAGAGTCATGTGCCCCATTGG  
TCTCTCTCTGTAAACGGCGCATCTACGTGCGTGCTCTGTTACGGGCAG

>lmaj\_35\_2\_up with W88329 892958, 893359

AGAGCAGGCACGCGAATTTCTTCGCGGAGGAGAACCCTGCAGACAGAAGAACAAGCAGGGCCTGTTTCA  
CATAAGAGAAAAGACATATGGGCGATGCGGCACCAACGGCGCCGTATGATATGCCGTGAAGAAGAAAACATA  
GTGGAGATGAACACGGTTGTGGCACACCCTGGCAGGTTGTGCCTGCACCTCTGCTTCTCTCCCGTCGC  
TGGAGAGCTCTTCGTGGAAGGTGGTCACGTTTTAGTGGGGACTGCAGCTCCTCGGCCGCCCTTCTTTTTC  
CCTCCTTCGTCTTGTTCGCGGACTCGACCTCTCCACCTTCTATCTCCTCCCTTGTGCTTCATGTGCCGTA  
CACAACAAAACAAAACCCATAAAACAACAAAATGACGAAAACGTGGAGCAG

>lmaj\_35\_30\_up with T67347 1409610, 1410010

CCACCCTCCCCCTCTGCCGCGCTGGCTGGGTAGAGGAAAGATCGGGACGGGTCTACGCGCTAGGCG  
TCTGCATGTAACACGGCAGAAGACACTGAAAGGCTCGCGAGTGCCCATCTTTCAAGCAGCGAGCACAAGC  
GTGTGTTCAAGCTCTTCGCAGCGGACGTGGCCGATGCGACCCTTTTTTTCGTGGAATCGTCAAGACGGCA  
CATTTTTACGCTTATGTGCGGGCCTGGCCAACATCGCCTTCAGCTCGTGTCTACTCGCTCCTCCCCCCCC  
CCTCCTACTCGAGCCCTCTCGCTTTCTCCTCTCTGACGTCTTCTGAAAACCCGCTCGCCCTACCTCGC  
GCGTTGCCCCGCGCCCTGTGCAATGTGTCTCTCACACACGCACGCACAAG

>lmaj\_35\_3\_up with W88381 64300, 64701

AAAAAAAATAATGCACCAGGATGCCCCCTCTCCCCCGTCTACTCCGATGCTGCCGCGCATGACGCTCTT  
TACTTAGGTGGTTGCCGCACCTGGCGTGACCGTGTCTCCCACTTCATGAGAACAAGAAAAAACTAGCAG  
AATACAGTTTTTTCTGCTTGCGCATCACCGACGCGTTACCGACTAGTCGTGGAACCTCACGCTCTCTCTCCA  
ATCACGGAATAACAGCTGGCTCTACTCCGATGTGCTCACTACCCGTCAACAATACGTCCCCCTTC  
TCCATCTTGTATTCCATTGTTTCATCCTTTCCGGCACACATTTGCACTGTACCCTCCCTCACCGCTTTCA  
TCCCCACCACCTTGAACACTTCTCCCCCTCAAATGCACCCGTGCCGAG

>lmaj\_35\_4\_up with W88308 738502, 738903

AGGGAAATACTTGTACTCATAGAGGAGAGTGAGAAGCAAAGTATTCTAAGTCGCTGCATTTGACGAGTTT  
TTTGTACCAAGCTTGGCTCAGTGCTTCGGAATTCAGTCCCTGAATTACAGGAAAAAACTAGCACCGAT  
CCCGAGCACCAGCGTACAAAAGTGTGCGGTGGTATCTGAAAACAAAAAAAAGCGTTGGAACGACTGCTCTG  
CGTGTAGAAGTGACCTTGGATTCCCGTGCTGACCTGCGTCTCTCTTGTTCGCCCGTAGCGTTCCTT  
GCGCGGACGGGAGAAGAAAATGCATTTATGTAAGTGGCTTGATACTCATTCTCAGTCGAATAATAGCCTC  
CTTTCTCGTTCTCCCTGGCCTCACTTTTTGTTGCTCGGCTACACTTTAG

>lmaj\_35\_5\_up with T67319 687613, 688013

CACCTGTGAAAAAGAAAAGACATGCTTTTTCCCGCGCTTTCTTTGTAATGATTCTGCTACGGTGGCCTTT  
TTGTGTTGCCAATGCTTGAGGCTTTCCTGAAGTGCACGCGATCAAAGAGACGAAATCCCCGAAAAAGG  
TACAGAACGAAACAGCAACGCTTGACTGCTGCTCTCAGCAATCTGCTTCTCTGTGGGGGACTTCGCACTC  
CGCTCAAAATGTTATCAAAAGGCTTTCTCATTTTTCTTTCTGCTGTCTGTCTTCTTTCTACTCGTTATA  
TTCCTGTGATACCTGATTTCACTGGGAAATATATATATATATCGACACCATATCCTTCACAACCTAACCA  
CATTTTATTTCTTTGTCCTCTGCTTCTTATTGAAAACGGTTTTGCATCAG

>lmaj\_35\_6\_up with T67312 2034078, 2034479

GGCCGCGTAACGTTCCGGAAGGCTTTGAATATTCTTTGTGTGTATCCTACTAGCATATCCCCAGCGTCTG  
GTGCAGTGACGTGCCGGGACTCTGCAGGAAAGGATGTGTATTTTTCTTCTGCCTCATTGCGTGCCACTG  
AGTTTCAGTCTCTCCACCAACCAAAAATAGTCCGTGCTTCGCCACGTAAAGCTCTGCAACAAAAAGTGGCT  
GTTGCTTCAAAGAGCGCCAAAAGATGTATGCGCGCACACCGCCGGCAAAAATCCCCGGTGAGAACCCCTCC  
CTCTGTTCTCCCTCCCTCGTTGGGCAGAACACCGCCGCCCGCTACTTTCTCTCTCTGTATGCC





ACGGGCGATGGCGTTTGTGGCTTCTGTGGGAGCCCGACTCCCTCTTGTGGGGCCACCTTTGCGGTTTGC  
GCCAGAGGTGTTGCGGCCCTTTCTTTTCTGCCCTCTGCCATTCTTTGCGGCCGCTCAAACGCATTGGGAG  
GTGCACATCAGCCGGCTGTTTCACTCACGGGCGGCCCGCGCCAGCAGTGCCCTGACTTTTCACTCTTCC  
TTTCTCTCGACATGGATGAACGCCCCACGGGGTCCCTGCAGCACTCGGCCTCTGCTCAACACCGCTCGTG  
ACTCTCTCTCTCTCTCTGTTTCCATTGTTTCCACTGTTTCTTCTGCAG  
>lmaj\_36\_16\_up with W88390 1443629, 1444030  
TTGCCAGTCGGCACGCAGCCACATTCCAGCACCCCCCTCGAGTTTGTGTATCCGCGCATGAGTTGCGGCG  
GTCGGGTGAGTGTGGGTGGGTAGGCACACATTCACTGGAGGGCTCGGGAGGGGAAAGTGTGCACACAAG  
ACAGACTGTGCCAAGCGCGTGTGTGGGCGCCTGCTTTTACATTTTATCCTTCTCATCCCACTTTTGGCG  
CTCCGCCCCCTTGCTATTGCACCCTCACACGCCCATGCCAAACACTCACGCACATCGGGCCACACTCGC  
TTCTCTGCACCAATGGTACTCGCCGCTCTTATGCCTTCACTTTTGGCTGGCTATTCCTCACCCCCCT  
TTCTCCATCATCACCATCACGCAGTCTCTCCGCTACCGAAACGAGGAAG  
>lmaj\_36\_17\_up with T67373 2655550, 2655950  
CGGAGATGTGGTCGTACGAGGCTTGTGCGTGAGGTGCTGCTGCGTTGCAGGATGCTTTTTTTTGTGCGCG  
CCAAGTGCCTGGGCTGCGCTTTTGGCTGTTCCACGAACGGTGCCTCTCCCGACGTTTCTTCTCTGTG  
TGTCTTGGCCGATGCTTTTTCATATGCGATGTAGGCTCCCTCGGCGTCGCCGATGTACGGTGTGATGTG  
CGTGCGTACTCTGGCCATCTCACCCTGCTATCTCCACCTGGTCAACCCTTCTTCGCTTTTTTCGTGCGTG  
CGCACAAACCTGTTCTTGGTGCTACCTCGCTCTTGTGTTTTTTTTTGGCTTCTGGACGGCCTCCCACTC  
CGACGTGTGCTGTTACTTGTTCACACTTGTGCGTGGGTTGTGGGGTAG  
>lmaj\_36\_18\_up with W88255 1802885, 1803286  
TTGCTGCCGAAGAAGTGTCTTTGCTATGAGCCCCTGTGCACCTGCGATCGGTGAAACCTTGTCTTCTGCT  
TTTTGTGTGTATCTCGCGGGGAGGGGGGAGGGAGATGCCCTTGGCGCTGCACCCTGTGTAGCGTACGCC  
CCCCCCCCCTCTTTTTTGTATCCGTGACGGCTGTGCAGCGAACACGCGGTGCGAGATGAAAAAAGGCA  
TCGATCACCATTGTCGCTTTTTTGTGTTGTGGCAAAGCGTTTTCGTCAAGTACCGCTCTCCCCCAGAAG  
AACCAAAAGATGAACATGACTATGTGTGTTGCTCCCCCTCCATGACCGCTCGTCCGCTCGGCACGGCAATT  
TCATTGTCGCTTCTGCTCGACTCCCTCTTCTGTTTGTCTTCTTCCAAG  
>lmaj\_36\_19\_up with T67364 462157, 462558  
GCCCTAAGTTTGTGCTTGCCTGTTGACTTTCAACGGCAAACGGCGACAGTAGCGTGACAGGCGGGCGGA  
AACGCAGACGCAGATATCGACACTAGGGATGCGGAGTCGTTGCCATCCCCAGGGGCGGCAGCATTCTCT  
TCGCGGCTTGTATCCAGAAGAGCGTCCCTCCCTCAACAAGGTGTGCTCTGTAAAGTGTGTTGTATGCTCC  
GCGGACCTCAAAGGACTGTAATCCGAGCGACCCTATCACCCACCGCACATGGGCCGCTCTGCGCCTCGG  
CGTTTTATGTGCGCTTCCACTCTCCGCTTCACTGTTTCACCACACGCCCCCTCACCCCCCTCACCCCCA  
CACACACACACGCACCACGGCAACGTCTACACCACGCGGACTCCACAG  
>lmaj\_36\_1\_up with W88392 1415100, 1415501  
CTCGATTGCACACACAGCGTCAGCGAGCAGAGGCGGAACCTTTACGGCTTCGAGGATGAATATGATGATGA  
GGCTCCTGCTGAAATTCAGCGAAAAGTGAGCACAATGGGCTTATCCTTTTCTCCTAAGTCAATATGTATTT  
TCTTTTGTCTTATGCAAGGAAGGAAGTAAAAAAGGAACGTTTATCGGGAAACAGGCACCGCGGCC  
TGTGATGCTGCGGCCCTCATGAGGTGATAAAAAGACCCAGTAATAACGCTTTTTTTCGCTGATCTAGTT  
CAGCTGTTGCACATGCCGAGGTGGCAGGTAAGGCTCGGCCCTCTTTACAGTCTCAAAAAAATGCAGCGT  
CCCTGTCTCTTCTCCTTCTTGTGCGTTGATCGCGCTTTTTATGTGAAG  
>lmaj\_36\_20\_up with T67316 155814, 156215  
GGGTGTGATACCGATTGCACTGAGAAAAGAGATAAGACCCAGTGAGCTTGCAGCGAAGTCTTATTGTC  
CTTACAGAGCGCGGGCTTCGCCCTTCTGCTGTTGGGACGCCATCCCTTGCACATTCTCGCACCATCACT  
AGCGAGAAGGGGTAAGTCTTTGTGATAAACAACGAAACCCTACGCACAAGAGGCTTCCCTCTGAAGCG  
CTCAAAAGCATCAGAATGACTGATCTTACTTCCACAGCGGACTGCACGTTGATTTTCAACGGAGCAAGAG

TCGTTGCAGTGCATACCGCTCCGATTACCTGTTTTCCAGTGACGTTTCAACTCCCGTGCTTTTCTCTCG  
TCTTACCTTGGTGTCTTTGGGTGAACTGTAAGTGTACTTGGCACAACACATCTAG  
>lmaj\_36\_21\_up with AA125616 177654, 178055  
CCCCGCGCAAAGCAAGAAGGTCAGAGAGCTGAGAGGCGGAGAGAGAGTGGGAGGCGTGTTCGGCGCACGC  
ACTCCAGCAGACTCTCTCCTCTCCTAGGTGATGTAATGCTGCTTGGTGGCTCTGTCTTTAGCCAAGAAAA  
GCGGAGCTGCCGGTGCCTACGAACTTGAGCTTGTCTCATGATGTATGGTCTTCTCAGCCAGACGCGCC  
CTGGCGCAACTGCTATTTCGGCGGCGCAATGGCTTTGATGCATCTTTTAGCGATGGGAGCAGGCGCACACA  
TGCATGCATCTCTCTCCGTGTCTCGTCTCGCCTCTCCCCTCCAATGTACCTTCCCCTCTCCACTGTGCCT  
GATACGGTTTTTGTCTCCCCCCCCCACCCTTCCCTCGGCCGCAACACACAG  
>lmaj\_36\_2\_up with AA060758 334261, 334661  
CGGGTCATCAGCCGCGACCGAGGAAAGCAGGCTATACTCGCCCCTGTTTTGAATGAATGCGCATGAACT  
TGCGGTGGTGCCGAGGCGATGGGCTGGCGGTTCCCTGTGTGCGCCAGTTTGGTTGGCTGACAATCGTGTGTTG  
CGCACCCCTCCCCTGCGGCGCCCCGCTTTCCCTTCCCTTCACTTACAGAGCCCTCGGTGAAGAAAGAAC  
GGGCCTGCTCGGTACGCGGCGATTCTGGTGTGACGTGCACGTGCTCTATCACTACTGTGGCAAGTAAGT  
GCTTCTCCTGTGCTCCTCTTTTGCCTTATTCCCTCTTCGCAATGCCTTTTTCGTTGTTGTCACAACCACC  
TTTTGGGTTTTGGCTGCTGCGTGTGCTGCGCTGTGTATACGTATCCCCTAG  
>lmaj\_36\_3\_up with T67372 708167, 708567  
CGCGCGTGAAGTACGAGCTGAGCAGTTTGGCCACCCCTCCTTTTTGCGTTGCAAGGGCGTATTATCATCA  
GTCGTGATGAAGGATGTCCATCAGCTTCGACCGCAGCTGCAGCCACTCTCATGACGAATGTGTGGGGA  
GGGAGGCGCTGTGGCTGTGACGGAAGCCTCCTCATGCACACGAAGAGGGGCGGCTGGCATCATGTGCTCG  
TCTCCTCTCTTGAGGAAGGGCAGTACGCTCTGTACGTCTCCGATTCTGACCTCGCAAGTACCAGCCTC  
ATCACTTTCCCTTTGACTTGGTCTTCCACTCTACCTTACCTGCTCGTTTTTGTGTGTATACCTCGCCCGTC  
TCTCGCCCTGAAACGGTGCCTGCGAGCTTGTTCCTTGTGCTGAAACAG  
>lmaj\_36\_4\_up with W88336 1589803, 1590204  
ATGGGCACGGGTGCCTGAAAAAAGCACAAGACAAGGTCAATGCACACGCGTTTTGGAGAAAGAAGCAGCTG  
GGGTAGGTGGAACAGGTGTGCTGCTTCTCTTTACACGGTTAGGTAGCCGTATTAACACCGAGGGTGTGCT  
CCTGGGGTGAGCGAAATGTGTCCTTTTCGAGCACCGCAGGCAGGGAGAAGGCTGCAATGCGTTGCGCGGAT  
GGTGCCTTTTTGGCCGCGCTTTTCGCTTTTCGCTCCTCTCTCCCTCACTGCCGCTCTGACAGCACCCGAG  
CACCAATCGCACGACCGTAGGCGTTACTTTAGCGGTCTTTTCGGTACACTGCATCACCTACCCCTTCT  
GCCCTTTCTTTTCGTCTGTTGTCTCGCCGCACTTTTGCCTCCCTGCACAG  
>lmaj\_36\_5\_up with T93379 1413772, 1414173  
ATTCACACTGTGCAGTCGCTTCTCGAATCGCCCCTGTCCACTTTGGAAACACTTAATGAGGCAATTTCT  
CTGAATGCATCAGAAGCGCATTCGCTGTAATAAATTGAGGTCGGGGTGAATAATGATTTGTTCCCCCAGT  
ACCGTAAAGAAGACTTGCACATGTGCCATCGAGTTGATCGTTGCAAAGGAACCGACACGCTCAAGCCCTG  
TCAAAGGAGATATTCGCTCCTTTTTTCTCATCCGTGTGTTCTGGCACTCATGTTTTACAGCGCGGAGAG  
GAAATCCGTTTTGCACATTGCCTGACTTTTGCATCCCTCTGAAAGAAGTCAAGTCGTGCTTCTTTGCGCTC  
AAAGGCAATTTCCGCCCTTTGTTTGTCTCACCTTCTCTCCGGCCTAACAG  
>lmaj\_36\_7\_up with W88373 462175, 462576  
GTGGTTGACTTTCAACGGCAAACGGCGACAGTAGCGTGACAGGCGCGGCGGAAACGCAGACGCAGATATC  
GACACTAGGGATGCGGAGTCGTTGCCATCCCCAGGGGCGGCAGCATTTCTCTTCGCGGCTTGTATCCAG  
AAGAGCGTCCCTCCCTCAACAAGGTGTCGCTCTGTAAGTGTGTTGATGCTCCGCGGACCTCAAAGGACT  
GTAATCCGAGCGACCTATCACCCACCGCACATGGGCCGCTCTGCGCCTCGGCGTTTTATGTGCGCTTCC  
ACTCTCCGCTTCACTGTTTACCCACACGCCCCCTACCCCCCTACCCCCCACACACACACACGCACCAC  
GGCAACGTCTACACCACGGCGGACTCCACAGTAAACCAGGTTCTTCAAG  
>lmaj\_36\_8\_up with W88256 483140, 483541

TTTGGCTTGCGTGCGCTTGCATGTCGTCCGAGGCGTGGAGTGCGGTGGGATGCCACACTGCTGCTGGCAA  
CTGGGGCGCCTGGGCATACTCACACTCATGCACTCGCGCACCCAGTTGCAAAGTAGTTTGTGATTTCGATT  
TTCCTTTTCTACAGGTGTACCGGTGCGTAGATGTCAATGTGGTTTTGCTTGAGAAACATGTACACACGCC  
CTCGCAAAGGGGCAGCGCTTGACTTCAATGTAACGAGTGAGGTCCCGCATACTTTCGTAAGTTGCTGTGT  
CCGTGTGCCCCGTGCGTTCGATTGTCGTTCACTGGTTTCTGACCAGAAGCCGCGTATTTCGCGCGCTTGGGTG  
ATGCTGGTGCATCCTCCACTCCCCCTCCTCCTCCCCCTCTGCATGAAAG

>lmaj\_36\_9\_up with W88279 1582721, 1583121

CCCTACAGGCAGTGTGGCTGTTTTGTGAGGCGCTTCGACTCTTTTGTAGTGTTCCTCCTTAAAGCA  
GATGCCGCTTCATCACCATCTTAAGGCCTCGTGCTTCGCAGCTATCGTTTCAGTTCAAGATCCAAGACAA  
AAGAACACAAGAAGATCGGATTCCGCAGATGTGCGACTGGATTTACCGCCGTACAAGAGAGCGCAACCAGG  
ACCTGCCAGACGCTGGAGATGCAGACAAACGGTGCACAGTTTTTTCCGTTTTTTTTCCCTTCGTGACCT  
GAGGCAGGTAGGCGGGGAGCTCACCTTCCACTTCTCGCCCTTCTCTTCATCCTCTTTCTCTTCGATGTTT  
GCGTGGGTGCGCACATTCTGCCTGCATTCTCACTGAGCCACCTTACGCAG

## **Coding data**

As a negative control, we utilized 198 coding regions that had been experimentally verified. These sequences were retrieved from GenBank and are reported below. For each gene, the coordinates for the protein-coding region are listed as well as the GenBank annotation of function.

>AF009148 1, 921 DNA polymerase alpha  
CGATACCAGGAGCTGAACATCTCGTCGTGGTCCACCATTGGCCCGCTGGACCTGAAAACGACTTCCGCGCT  
TCCAGGGAACCGCCACTAACGTGAATCAGGAAAAAGAGACGTGCATCGGGCGCCTTGTTGTGGACTCCTA  
CTCACTCTCGCGGAGCACTACAAGACAGTGAATTACAGGCTGCTGTGCTTGCAGACCAGATGCAGCTG  
CAGGGGATTACAAAGGGCAGCAACAACTTCGAGCCTGGCACCTCGGTGCTCACACCTGCGATGCTGTCCG  
CATCGCGGACATCTACGATGTGCTGCTGCAGGTGTGCAACTGCGCTGTGCTGTCCACAGCGGTCTGCTC  
ACATCTCGATGTGATTCTGACTGACCAAGCGCCTCACCACGATTGCAGGAAAACCTGTGGAGCCGTA  
TTCGGTGCCCGCTCCGAGCGCATCGAGTATCTCCTGCTGCACACGTTCCACGACCTCAAGTTCATTACCC  
CTGATCGCTATGTGCAGGACTTCAAGCGGGGCCACGACGACGAGGAGGAGGATGGCAAACGGAAGGCCAA  
GTACCAAGGGCGCATGGTGTCTGACCCCAAGTGGCGCCTTTACTCGGATTACATTCTCCTCCTCGACTTC  
AACTCCCTGTACCCGTCGCTGATTCAGGAGTTCAACATTTGCTTACCACCGTCGATCGTGA  
GCGAGATCGATGTGCCACCACCGGAGAACCTCATCTGTGCCTCGTGCGCCGACGAGGCCTCTCCGCTCC  
GTGCTTGCACAAGTGTGTGCTGCCGAAGGTGATCAAGAGTCTCGTAGACAGCCGTCGCGAGGTGAAGCGG  
TTGATGAAGACAGAGAAGGACGCGAACAACCTGGCGCTGCTGGAGATTCCGCCAGAAGGCGCTGAAGCTGA  
CGGCAAACAGC

>AF009163\_0 325, 7236 RPOIILS  
ATGTCGGGTGGTGGCGCTCTCCCGCCTTCGCAGATGCCGCTGCAGAAGGTGCATGAAGTTCAGTTT  
TGTTC AAGGAGGCGCAGATCAAGGCCTATGCCAAGTGCATCATTGAGCATGCCAAGTCTATGCGAGCAC  
GGCCAGCCGGTGGCGGGCGGCATCAACGACCTGCGCATGGGCACGACAGACTTCGAGTATAGCATGCGAG  
ACCTGCGGGCTGAGGCACCCGGAATGCCCCGGCCACTTTGGCTACGTGGAGCTGGCCGAGCCGATCTTCA  
ACATCAACGTGTTTACGTCGTGCTGATCGCGCTTAAGTGTGTCTGCAAGTACTGCGGCGCGTCTGAT  
GGACACAAACGACCCGTCAGAGATGAAGAAGATCGCGCATCTGCAGGGCCTCAACCCGCTGCGCATGGTC  
GCCAAGCTCTGCGGCAGCGTGTGCAAGCGGAGCAAAGACATCCAGGGCTGTGAGGGCNAAGGGCCGCCAG  
CCGCGCATCGGCCCTTCGTTGGCATCTACCCAGGTCTGCAGATCAAGTTACTCAGGAGGAGCAGGATTA  
CGTGTGGCAGCCGAGAACGCACGGCAGGTGCTGGACCGCTCTCGGACAGCGATGCCCTCATATGGGC  
TTCGACCGGCGCTTCTGCCACCCACGGACCTTGATCTCACGGTGTGCTGCCGATCCCCCGCCGCAAGTCC  
GGAGCTCCATATACCTGGGCGGTCTAATGCAAGTGCAGCAGCTCACCCACCAAATCATGTCCATTGTGAA  
GCGCAACATTCAACTACGCAAGGACAAGGAGTCCGGCGTCAAAGCCGCGCTGGACCGCTCGCGCGCACTT  
CTGCAGGAGCACGTTGCCACTTCTTCAACAATGCCTCCACCTACTACAAGCCCGCAAGGTGCGGCGACA  
CCAAGAAGCTTAAGTCACTGACGGAGCGGCTGAAGGGGAAGTACGGCCGGCTGCGCGGCAACTTGATGGG  
CAAGCGGTAGACTTTTCGGCCCGCACGGTATCACCGGCGACCCAAACATCGACGTCGATGAAGTCGGC  
GTACCGTTCTCCGTTGCCATGACGCTGACCTTTCGGAGCGGGTGAACGTGATTAACAAGAAGCGTCTGA  
CGGAGTTTGTGCAGCGCACACGTAACCTTTCGGCCAACTACATCATCCGGCCGAACGGAACGTAACGAA  
ACTGGCCCTTGTGAAGGATCGCAGCGCGCTCCACCTCGACGTTGGCGACGTGGTTCGAGCGCCACGTCATC  
GACGGCGACGTTGTGCTTCAACAGGCAGCCGACGCTGCACCGCATGAGTATGATGGGGCACCGCTCC  
GCGTGTCAACTACAACACATTTGCGCTGAACCTGTCTGACGACGCGTACAACGCGGATTTGACGCG  
CGATGAGATGAACCTGCATGTTCCGAGTCGCTGCTACTAAGGCGGAGCTGATTGAGATGATGATGGTA  
CCCAAGAACTTCGTGTCGCGAACAAGTCCGGCGCCCTGCATGGGCATCGTGCAGGACAGCGTGTCCGGCA  
GTTACAAGCTGACAGAGAAGGACACCTTCCCTGGATAAGTACTTTATTGCAGAGCGTCCCCTTTGGCTGGA  
TCTGTGGCAGCTGCCGATCCCAACCTTCTGAAGCCGCTCCACTCTGGACCGGAAAGCAGATCTTCTCG  
CTTATCCTGCCGAGGTCAACCACCCCGCCTCCCCGCACGACAAGCCGCCCTTTCCGCAACGACAGTA  
AGATCATGATCCAGCGTGGCCAGCTGCTGGGGGGCGCCATCACAAGGGCGTCTGCGCGCCGCCCCGGG  
GTCGCTGATCCACGTCATATTCAACGAGCGCGGCTCCGATGAGGTGGCCAAGTTCATCAACGGCGTGCAG  
CGGATCACAACGTACTTCAACTACTGCTTTGCCTTCTCGGTGCGCGTGCAGGACACCGTGGCCGATGCGA  
CGACGCTCAAGGAGATGAACAACGTGCTGCACAAGACGCGCCAATCCGTCGAGAAGATCGGCGCCGCTGC

GAACAACGGCAAGCTGACGCGCAAGGCTGGCATGTCGCTGCTGCAGTCCTTCGAGGCAGATGTGAACAGT  
GCCCTGAACAAGTGCCGTGAGGAGGCGGCGAAGAAGGCGCTGAGTAACGTCCGCCGCACAAACAGCTTCA  
AGGTCATGATCGAGGCCGGAAGCAAGGGCAGTGACCTGAATATTTGCCAGATCGCCGTGTTCTGCGGGCA  
GCAAAACGTGCGCGCAGCCGCATTCCTTCCGGCTTCCGTGCGCCGACGCTGCCGCACTTCATGTTGGAC  
GACTACGGTGAGACGTCTCGTGGCATGGCGACGCGCGGTACGTGGAGGGGCTGCAGCCGCACGAGTTTT  
ATTTCCACACCATGGCAGGGCGGAAGGGCTCATCGACACAGCCGTCAAGACGTCCGACACCGGATACCT  
GCAGCGCAAGCTCGTGAAGGCGCTGGAGGATGTGCACGCCTCTACGACGGCACGGTGCGGAACGCGAAC  
CAGGAGCTCATCCAGCTGGCGTACGGCGAAGACGGTCTGGACGGTGTCTGATTGAGGGCAACCAGGCCT  
TCCCAGTCCCGCACATGACGAACAGTGAGATGGCTGACAAGTACCGCTACGAGTACAACGACGAAGGCAG  
CTTCTCGGAGAACATGGGCGGCCATTACATGGATCCGTTTGTGCGCGACTCGCTGCTGCGCGACCCGCAG  
AGCGTGTGAAGCTGCAGGAGGAGTTTGTGAGCAGCTGATGAAGGATCGCGCGATGTGCGGGCTCGTGATCG  
ACATGGAGGACAAGAACAAGCTCAAGATGAACCTGCCCGTGAACGTGCGCGGGCTCATCCAGAACGCGCG  
CACGACGATGGGCAAGCGCAGCCAGGTGTCCAATCTGAACCCGATCACTGTGATCAACCGCTGCGGGAG  
CTGCAGGAGGACCTCGTGACGCTGTTCCCGTCTACCACAAGGACTACAACGGCCGCTTCGTTAATGTGC  
TGAGCCAGCAGCGCGTGGAGCGGGCCCTGACGCTCTTTGGCATCCACTTGGCCAGATCCTCGGCTCGAA  
GCGGGTGTGAAGGAGTACAAGCTGAACGACAAGGCGTTCGAGTACCTGCTGAAGGAGATCCGCACCAAG  
TACCAGCAGTCCCTCATCACCCCTGTTGAGATCATCGCGCCATTGCGCGCAGTCTGCGGTGAGCCCG  
CCACCCAGATGACCCTGAATACCTTCCACAACGCGGCATTTCTGTCGAAGAACGTGACCCTCGGCCTGCC  
GCGGCTGTTGGAGCTGCTGAATGTGAGCAAGAACCAGCGCAACGCCAGCGTGGCCGCTGCTGCTGATCCGC  
GAGTACCAGAAGCGCAACAAGGCGCAGGAGGCGCAGCAGTTTATCGAGTACTGCACGCTGGCGAATATAA  
CGACAACGGTGCAGATCATATACGACCCCGACCCGCGCAACACCGTCTGGCCGAGGACGAGGAGATGAT  
CCGGTGGGAGCAGGCGGTGATGAATGCAGAGGATGAGGAGCCAGATGCGGAGCAGCCCGCTCACCTTTC  
ATTGCACGCCTCATCTCGACAACGACCTCTTCAACGACAAGCGACTTAACATGAAAGACGTGAAAAGTG  
CGATCCGGCAGGTGGACGACACTTACATGGTGCAGGCAAACATGGAGAACGACGGCCAGCGCATTGTGCG  
GCTGCGTCCGCGCAAGTGCACCGGGGCGGACTCGNTGCCGGCGCTCACGAAGGCGGTGCGCAGCTGCTG  
CAGAGCGTGCACCTACGCGGTATCCCTGGCATCAAGAAGACGCTGCTAAAGGAGGGCAACACGTTCCGCG  
TCGACCCCGAGGCGGGCGGCATCAAGAACGAATCGAGCTGGATGGTGGACACAGAGGGCACGGCACTGCA  
GCGCATCTTCGTGCGGCTCGTGAACAGCGAGGGCAAGAACATCATCGACTTCTCCAAGACCAGTAGCAAC  
AAGATCCCTGAAGTGGTGACGGTGTAGGCATCGAGGCAGCGCGGCGCAAGATGCTCTCCGAGCTGCGCG  
AGGCTTACCTCGCTACGGGCTAAACATCAACTACCGCCACTACACCATCCTCGTCGACACCATGTGCCA  
GCGCGGTTACCTGATGGCCGTCAGCCGCACCGGCATCAACCGCAGCGAGACATCCGGGCCGTTGATGCGG  
TGTTCTTCGAGGAAACGGTGAAGGTGCTCATGACAGCCCGCGTTCGCGGAGAAGGATCCGGTGCCTG  
GGGTGTCTGCGAGCCTCGTGCTCGGAAATCAGGCCCCATCGGCACCGGCCTGTTGACCTTCTGCTGGA  
CATGAGCAAGCTGCAGCACGTGGTCCCGCTCGATAAGGCTACGGAGGCACGAACCTCAAACGTGTACCAC  
ACCGACGCATCCGTGCGACCGGGCTCGTCGACGCTGCAGGGTTCGCACGGCGAGCTGCCGCCGTCGACTG  
TGCACGAGAACAGCTCTTTCGCGCGGCGCCTCTCCGTGTACCCGCGACATGAGAGAGCTGGCATGTA  
CGGCGGTATCCCGATCGAGGCAAGCGAGGTGCAGTTTACGACGCGCTCTGCCGACGGTGTGAGAACGGCC  
TTGGCTTGCTCGAACACGACCGAGTACCACAGCAGCCACCCTCTNTGGTGCTTCCACGTACTTGGNG  
TCGTGCGCGCTGCCGAGCGGAGTGCCTTGATACCGAGCTGTCTCTCTACCACCTACAGTCAGTCGCCCC  
TTCTACAGCGTACGGTTACGCACCCATGGCGGCCTCTGGAATGCCTATGCCCGGTGCTACTCAGCTATCC  
GTCGGTGAGGGCGGCAGCCTGCCATACCCGTACGAGGCGTCAACGGCGAGCGCTTCGGCTCTCTCGGCG  
GCGCGGCCAGCTCGCGGGCGAGTGCGCCCTACGACCCACCCAGCAGCCGTCTCAGGAATTCTCGCAGAC  
CGAGGAGCAGGAGGAGCCGTGA

>AF009163\_1 6364, 7236 CLT

ATGTTGGCCGCCATCGTTGGCGTGTGTTCTCTGCGTGTACGTTGTCCAGGCGGAGATCTTCTTCCACG

AAGAGTTCAACACCATGGATGGGTGGGTGCAGTCAGAACACACGAGCGACTACGGTAAGGTCGCGCTCTC  
GGTGGGTGCGATTACGTGGATGCTGAGAAGGAGCAGGGCCTGAAGCTCATGGAGGACGCCAAGTTCTAC  
GCCGTCTCGAAGAAGCTGCCGAAAGCAGTTTCGAACGACGGCAAGCCGATCGTTGTCTCCTTCTCCGTCA  
AGAACGAGCAGAAGCTTACGTGCGGCGGCACCTACCTCAAGTTCTTCTCCGAGCTGGACCAGAAGGACTT  
ACACGGCGAGTCTGCGTACTGGCTGATGTTCCGGCCCCGACATCTGTGGCTCCAACAAGCGTCTGCAGTTC  
ATCTTGAGCTACAACGGCAGGAACCATCTCTGGAAGAAGCTGTGACGCGCAAGACCGACACAGCCACTC  
ACGTCTACACGGTCGAGATCGCGCCAAACAACACGTACCAGCTGTACGTGATGGCATGCACATCCAGGA  
AGGGTCGTTGGAGGAGGAGTGGGACATGCTGCCGCCAAAGACCATCTCTGACCCGACGGATAAGAAGCCG  
GCGGACTGGGTGGATGACATGATGATGATCCGTCTGACACGAAGCCGGAGGACTGGGAGGACGAGC  
CGGCCACCATCACTGACTCCGAGGCTGTCAAGCCGGTGGACTGGGACGATTCGGAAGACGGTGTGTGGGA  
GGCCCCGAAGGTTCCGAACCCGAACTACCCGGGTGCGTGGAAGCCGCGCCGATCCATAACCCCGACTAC  
AAGGGTGAGTGGGCAGCGAGGCAGATCGAGCTC

>AF031902\_0 5881, 13997 LORIEN

ATGCATGCTCTTTCCGAGGCGCTGCCCGCTGCACGTAGTGTGCGAAGCGCACTTCGGGCAGGTCTTCCCT  
CGCCTCTGTCTGCCGGCAGCGCGAGGGGGTGATGCGAGCGAGGAGGACGAGGACGCCTTACCATTGT  
GCGGGCTGCAAGGCGCACGTGCTTGAGGTGCTCCGCCACGAAGTCTTCGAGAACCCGTCGAGTTTTGTC  
TTGTGCGCCGTGTACCACTTCGTGGACATGCTCGGGGCGGTGGTGGTTGAAAAACAGCAATCTGACCACGA  
CGCTGCCTGCACCTCACACGCTGCACGAGAGACCGGCGGAGGGCTTCTCGCCGACGCGCGCTGCTGCT  
CGTGCCTTTGACAGAGGCCTACGAGCACACCACGGGTGGATGGTGCCAACGGAGATGGAAGGCGCGCAG  
CTTGCCATGTGCTGTACGTCAACGACACACCCGTCTCTCTACCGCGAAACTGGCAGCTTTCCTCCCA  
AGGAGGCGGCCGAGTAAAAACCGCAATGACGGTGGATATCACGCCCTTGTGCTCCCGATTGAACGGGA  
TCTCTTCTCCTTACAGGTGATCTTCTCTGGCGATGTGGCCGAGATGGAGATGTGGCGCGGCGTATCGCT  
TGTGTGCTTGTGGAGGAAGTAGAGTTGGCCACCTCGGTGAGCGCATCGTGTCCACGTATCACAAGCGTA  
GAGCGCCCGTCATCCGGCGATCGCCGTTGCCATCCTGCGGCGAGCGCGGCGTGGTTGCAATCACGGAGGC  
GTCGGTGAAGATTCACTGCCCATACCACGCTCACGATGGAGATCCCTGTGCGGGGCATGACTGCGAG  
CATCTGCAGTGCATGGAGTTGGCGGCGGTGCTCATTCAATGTGCTCGGCAAAACGTGTGGAACGTCCAC  
TATGCTCGGCTGCCATGAAGCCGGAAGACATCATCGTCAACTACCGCCTCAAGGACTGGATCGCCTCGCA  
TTCGCAGGAGGTAGTGGCGCAGGTCCAATATGTGGTGGAGACGGAGCTTGGCCGACCGCTGAAGATTGTG  
TACAAGGCCGCAAGACCAGAGCAGCACTCCACAATCGAGGTGGTGGATGACGAGGAGGAATAA

>AF031902\_1 7687, 13997 metK

ATGTCTGTCCACAGCATTCTTCTCCTCCGAGCACGTGACGGAGGGCCATCCAGACAAGCTGTGCGATC  
AGGTATCCGACGCTGTGCTTGACGCGTGCCTCGCCGGCGACCCGTTCTCGAAGGTTGCGTGCGAGTCGTG  
CGCGAAGACGGGCATGGTGTGTTGCGGAGATCACGACAAAGGCAGTGCTAGACTACCAGAAGATC  
GTCCGCAACACGATCAAGGACATTGGCTTCGATTCCGCGGACAAGGGTCTGGACTACGAGTCTGCAATG  
TGCTGGTTGCGATTGAGCAGCAGTCGCCGACATCTGCCAGGTCTGGGCAACTTCGATAGCGAGGATCT  
CGGCGCTGGCGACCAGGGCATGATGTTGCGCTACGCGACGGACGAGACGGAGACGCTGATGCCGCTGACG  
TACGAGCTGGCCCGCGCCTTGCGAAGAAGTACAGCGAGCTTCGCCGCTCCGGCAGCCTGGAGTGGGCTC  
GCCCGGACCGAAGACGCAGGTGACGGTGGAGTACGACTACGACACGCGGAGGGCAAGCAGGTGCTGAC  
GCCGAAGCGCGTGGCGGTGGTGTGATCTCTGCGCAGCACGACGAGCACGTGACCAACGATAAGATCAGC  
GTGGATCTGATGGAGAAGGTGATCAAGGCTGTGATCCCTGCGAACATGCTGGACGCGGAGACGAAGTACT  
GGCTGAACCCATCTGGCCGCTTCGTGCGCGGTGGGCCGATGGCGACGCCGGTCTGACTGGCCGAAAGAT  
CATCGTAGACACGTACGGCGGCTGGGGCGCGACGGCGGTGGCGCCTTCTCCGGTAAGGACCCTTCAAG  
GTGGACCGCTCCGCCGCTACGCCGCGGATGGATCGCGAAGTCGATCGTTGCAGGTGGCTGGCGCGCC  
GCTGCCTTGTGCAGCTCGCGTACGCCATCGGTGTAGCGGAGCCGCTGAGCATGCACGTGGAGACGTACGG  
CACCGGCAAGTACGATGACGCGAAGCTGCTGGAGATCGTGAAGCAGAACTTCAAGCTGCGCCCGTACGAC

ATCATCCAGGAGCTGAACCTGCGCCGCCCATCTACTACGATACGTGCGCTTCGGCCACTTCGGCCGTA  
AGGACGAGTTGGGCACGGGCGGGTTCACCTGGGAGGTGCCAAAGAAGATGGTTCGAGTAA

>AF034357 6, 557 *Leishmania major* Abdou surface protein  
amastin gene, complete cds

ATGCTGTGCTCGTGCATCGTGTTCATGTTCCCTCGTGACGTCTGCGCCGATCTCGCAGTTCGGCGGCAGGG  
GCATCAACGCTAGCGCCACTGGCGGCGCGAGCAAGTTGTCGTGCGTGAAGTTCGCTGGGGGCTGAAGAACGA  
CTGCAACTCCAACAACACTACGACTACCGCCCGACGAGCATAGGGTGCACGCGGAAGCAGCTGTTCCAG  
GTGTGCGGAGGCGTTCTACATTGTCGCCGTTATTGTGTCGTTCCCTGTCGTGCCTGATGAGCGGCCTGTACT  
TCATCGGCATGAAGGCAAAGGTGCTGCTAGTCCCTGCTTGCCTGCTTGGAGTTGTGGTGCAGCTGATCCC  
ATGGGTGTGCATGACGGCGGTGTGGCACGGCAACTACTGCGGCGGGTGCACCGTGAAGATCAACACGTCG  
AACGGCAAGGCGGACGGCGTGCCTGACGGCTCTGTGCTGCGTGAAGTTCGTTCAAGGCCAGCGCTGGCTACG  
GTCTGACGGTTGCGGCGTGGTGCACCCAGGTGATTGGCCTGGTGTGCTGATTATAATGTAG

>AF034804 22, 960 LACK

ATGAACTACGAGGGTACCTGAAGGGCCACCGCGGATGGGTACCTCCCTGGCCTGCCCAGCAGGCGG  
GGTTCGTACATCAAGGTGGTGTGACGTCGCGGACGGCACAGCCATCTCGTGAAGGCCAACCCGACCG  
CCACAGCGTGACAGCGACTACGGTCTGCCGAGCCACCGCCTGGAGGGCCACACCGGCTTCGTGTGCTGC  
GTGTGCGCTGGCCACGCCACCGACTACGCGCTGACCGCGTCCCTGGGACCGCTCCATCCGCATGTGGGACC  
TGCGCAATGGTCAAGTGCAGCGCAAGTTCCTGAAGCACACCAAGGACGTGCTCGCCGTCGCTTCTCGCC  
GGACGACCGCCTGATCGTGTCCGCGGGCCGCGACAACGTGATCCGCGTGTGGAACGTGGCCGGCGAGTGC  
ATGCACGAGTTCCTGCGGACAGCCACGAGGACTGGGTGAGCAGCATCTGCTTCTCGCCGTCGCTGGAGC  
ATCCGATCGTGGTGTCCGGCAGCTGGGACAACACCATCAAGGTATGGAATGTGAACGGGGGCAAGTGTGA  
GCGCACGCTCAAGGGCCACAGCAACTACGTGTCCACGGTGAACCGTGTGCGCCAGACGGGTGCGTGTGCGCG  
TCCGGCGGCAAGGACGGCGCGGCGTGTGTGGACCTGAGCACGGCGAGCAGCTGTTCAAGATCAACG  
TGGAGTCGCCCATCAACCAGATCGCCTTCTCGCCCAACCGCTTCTGGATGTGCGTCCGCGACGGAGAGGT  
TCTGTCCGTGTACGACCTCGAGAGCAAGGCCGTGATTGCGGAGCTGACGCCGGACGGCGGAAGCCGTCC  
GAGTGCATCTCCATCGCTGGTCCGCGGACGGCAACACCCTGTACTCCGGCCACAAGGACAACCTGATCC  
GCGTGTGGTCCATCTCCGACGCGGAGTAA

>AF034925 196, 3564 MRK1

ATGCGCAGGGAAGGTGGGGCATTTTCGCGGACATCGTCAACCGCGGTGACCCACCTCGCCCATCAGCCCTG  
CCGACGAGGAGGATGAGTACATGGGAAGTAGCACGTCCACCGCTGGGCGGCCACCCGAGTCCAACACCAT  
GACCGGTGCGTTCACTCGACCGCAGTGGTTCGCTGGCAACAGAGCGACACTATGCAAGCAGTGGGCACTCA  
GCCGCCAGCTCGTGCAGCACTCACACGCTGAAGGTGAACCAAACGAGAGCTACCGGCCGGTCCCGATG  
ACAGCGGCACATACAGCGGAACCTGCGTGACTCGCCAGCCGACCATGAGCAACACCAGCGTTTCGGT  
CTCCCCATGGATAGCAGCAGCCGCGAGGAATGGGGCCGTTCCCTTCCGCCTTTTCAACTCCTGTGCGTTC  
CTCACCAGCGCCTCAGGCTCACGGCAGCGTGACGGCAGCATTGGGCGAGCTGTATCGCAGCACTTTCCTGC  
ATGGTCCGCGAGGGCCGCGGACGAGCATTGGCCCGGAGGCCGAAAGGCCACTCCTCGGCAGCTCCATGGT  
CCATCAACCACAGAACAGCTTCTTTGGAACCTTTAGCGGGCAAGGTGGACGCTATTCCTTCTGGCCCCCT  
GATGTGAACGCCAGCGGAGTACTGACGGCCGCTCGCCGTACGTGCGATCCAATCCGTCCGCGCCTGTGT  
CGACAGCGAGTCCCCTATTAAGCTTCTCTCGCTTCCCTCGGGACGGGGATCTCGCCTCGCGGGCTGGCGGA  
CGGGCACGCTGTGCATCGTGTGTCGCGTCTGCGCAATGGGCTCGGTGGTGTGTAAGTGTCTCACCAGGT  
CAGAACGAAGTGCCTTTGGCGATGAATGCCTTACGCACGCACATTGCGCTGCGCGGCAAGACGATCATT  
AAGGCGATGCCGCGCACCCGCTGGACATTCGCAAGGTCCCCTTATCGGCGCCGGCGGCTTCGCGAAGGT  
CTTCGCGGGTGTGGACACGATACGCGGAGAGCTTGTGCGCCATCAAAGAGATCGACATCTCCCGGTGGAC  
GACGTGAAGGCGCTCAACGGGATCGAGGCGGAATTCGCCCTCCTCAAGTTCGCTTTCATCACCCCAACATTG  
TCAGCTACTCCCTCTTCGAGCACAGCAAGTTCGCGAGAAGGTCTGCCGATTGCGATGGAGCTGCTGTGCTGG



TGACTCCACTCTCCACTTGCTGCAGAAGTTTGGACCACTGACGGAAGCGGTGCTGCGCATCGTGGCGCGG  
AGCGTCCTGCGCGCCATTGCTTTATCCATAAGGAGGGCATTTTTACCGAGACATCAAACCCGCGAATA  
TCCTCGTCAGCCACCGCGGCGAGGTGAAGCTGTGCGACTTTGGCTGCAGCAAACGCGTGTGCGAGCTGAA  
CAAAGCTGCCAGCTGCATCATTGGAACACCAGTGTACATGGCCCCGGAATTCATCAAGGGTGAGGCCAAT  
CACAAGGCGGATATATGGTCGATGGCATGCGCGCTTTTCGAGCTGAGCACCGGGGCTGCTGCCTTGGTACC  
ACTCCGGCGCCAAGGACAATCTCCCTCTCATGTTCTACCTCACGACAACGTCGGAGTCTCCCATGGTGTCT  
GCCCTCGCCAGAAGCCAAGAGCGAGTTCTCCGCGGAGTTCTTCAGCTTCATGGAAGTGTGCTTCACACGC  
AACGTGGCTAATCGACCAGAAGCTGACGATTTGCTGAAGCATCCGTGGATCACGGGGTCGCGGCTCGCGC  
CGGTACCAAACCTGCCAGCGCTGTCTTCTCTCCACCAGGAAAGTTCCGCGGTGCTTCGGGGCTTCGG  
CTCACCCGGGAAGTCTTCCACATTCTCCAGCCCGGAGACTCGGCGGCGGACCGCGACGACATGAGCTTC  
AACGGCAGCGACGGCTTGCAGAAGTCCGTCTCCACCACCCCGACTCTCAACCCCGCGGAGGAGATGG  
CGTGCCAGCAGGAGTTGGAACCGTGGCGGCGGCGACGGCGCTGGAAGTCTGCTCCCTGCTCGTGTGCTC  
ACTGGAGATCCCCCTCGTACCGCGCAGGAGACTGTGACAGGGGAAGTGGGCTCGGGGACCGCGACACG  
AGTCCCTCGCTCACGCGCACCTTCTCGATCCACTACCCGCCCTCAGTCATCGTGGCGGCGGTGTCAGCG  
CGAGCGTGGCCGAATTTCTATCCCCTGTGTATACCCAGAGCATTCCATGGTGCACGAAAACCTTTACTA  
CAGCCAAGTGCCACTTGGGGCGTCTGCAGGCAACTTTGTCTTGGCGCCCGGACTGGACTTGGATGGGGCA  
CCGCCGAGCAGCAGTACTTGGCGATCAACGAGGAAGGCAACCTTGATATGGTTACCTCCCGGTGACG  
AGATGGAGGACTCGGTGCACGGCAGTCCGCCTTCGGCGACAGCGCCACGGCTCCTTCCACGCTGGGCG  
TATTGTGTCCCAGCGGTAACAGCTCGTTCAGCAGAGGTGCCCTCAGCCCCGCGGTGCGACGGGGCCG  
AACGCCATGGGCGTAGCCGACGGCCCTTTCTCCCGCTTCTCGGCATCAGTGGCGTCTTCTCTCGCAGGG  
AGTGCCTGTCGCGCGGGCCCGTCCAGTCCGTCTCCCGCAGGGGATTCCCGCGCCGCGTGTGTG  
CCGGCCCGGCCCGGACGACATTTGTAAGTCAGCCATGCAGCCACACCGGCTCTGCGCATACTGTCGAC  
GTCTCTCCCACGTCCGCATCCAAGACCGGCAGCAACCTCGACGCCGTGACGCCTCGCACCCCGCGTCTA  
ACTCGCCACTTCCACGCAGCGCAGTGAGAGCTTCCGCGGGTTGCCGAAAAACTGAAGGCGCACGCTGA  
TGAAAACTGCACATGTCTTCTCTGTCAACACCGCCCCAGGATGCGCCGTGAACGTGGAGCTGAACGTC  
GATGTGGCTGATGTGCAGTGCAAAGTGGTGGATAACCAGCCGAACCTTTGTGGTGGCTTACGGATGACG  
TGCGAAGCCAAATCGCAAACAAGATTAAGGAGGTGGCTGAACACTCTTCGTGCGGCATGCCTGCCAGAC  
TGCAGGAGCTCATGCCTCGTCCCTGAGCCCGTCTGCGGGATGGAAGCGCACCGGTGCGTCTGCAAGT  
GGCGGCCACTTTTACAACGCACCGTTATTCGCGTCCGCTCGAAGGCCACGCCGCGTCCGCTTTCACACG  
TCTCCACCGGCAGCGCGCAGCGACTGGTGGCCGTCCCGCGCGAGTCTGCTTCCCGGCTATTGCGCCTACTC  
TGGGGAGGAGGGCTCCGACATGGACTCCCACACGTCGTGCGCAATGGCAGCGGGCTGGAATGAACGCATG  
GACAAGTAG

>AF038409 912, 1901 arginase

ATGGAGCACGTGCAGCAGTACAAGTTCTACAAGGAGAAGAAGATGAGCATTGTGCTTGGCCCTTTCTCTG  
GCGGCCAACCGCACAGTGGGGTAGAGCTGGGTCTGACTACCTCCTCAAGCAGGGACTGCAGCAGGACAT  
GGAGAAGCTTGGATGGGATACAAGGCTCGAGAGGGTGTTCGACGGCAAGGTTGTTGAGGCTCGCAAGGCG  
AGCGATAATGGCGACAGGATCGTCTGTCAAGCGCCGAGGCTGACGGCGGAGTGCACGGAGAAGATCT  
ACAAGTGTGTGCGCAGGGTGGCCGAGCAGGTCGCTTTCTCTCACCATCGGTGGCGATCACTCCATCGC  
CCTCGGCACGGTGGCCGTTGTGTTGTCCTGACCCCGATGCCGGGGTGATTTGGGTGGACGCCACGCG  
GACATCAACACTATGTCTGGCAGGTCTCCGGCAACTTGACGGCTGCCCTTATCGATCCTGTTGGGGC  
TTGATCGAGAGAACATTCCTGAGTGCTTTTCTGTTGTTACCGCAGGTGCTGAAGCCGAACAAGATTGCCTA  
CATTGGTCTGCGTGCTGTGACGACGAGGAGAAGAAGATCCTGCACGACCTGAACATCGCCGCTTACGC  
ATGCATCACGTGGACCGCTACGGCATAGACAAAGTGGTGTCCATGGCGATCGAAGCCGTCTCGCCGAAGG  
GTACGGAGCCGGTGATGGTGTACACGAGTGGACACGATCGACCCCTCTACGTCCCGGCGACGGGCAC  
TCCCGTGCCTGGCGGCTCTCTTTCCGCGAGGCGTTGTTCTTGTGCGAGCGTATCGCCGAGTGGGTGCT

CTTGTGCTCTGGACGTGGTGGAGTGCAACCCGCTCCTCGCCGCTACGGAATCGCACGTGAACGACACCA  
TCTCCGACGGGCGGCCATCGCGCGCTGCATGATGGGAGAGACACTTCTTTACTCCGCATACGAGCTC  
CAAGCTGTAG

>AF039721 301, 2235 gp63-6

ATGTCCGTGGACAGCAGCAGCAGCACCGGCGCCGCTGCGTGCAGCGCGCCTGGTGGCCTCGCGGCTG  
CCGGCGCCGAGTCACCGTTGCTGTCGGCACCGCGCCGCGTGGGCACACGCCGTGCGCTGCAGCACCG  
CTGCGTCCACGACGCGATGCAGGCACGCGTGCAGGACGCGTGGCGGACCACCACAAGGCCCGCGCGG  
GTGTCCGCGGTGGGTCTGCCGTACGTTACTCTCGACGCCGCGCACACCGCGCCGCGCGATCCCAGGC  
CGGGCAGCGCGCAGCGTGCAGGACGCGTGAAGTGGGGCGCGCTGCGCATCGCCGTCTCCACCGAGGA  
CCTCACCGACCCCGCTACCACTGCGCTCGCGTGGGCGAGCGTGTCAACAACCACGCCGGCGCCATCGTC  
ACCTGCACCGCCGAGGACATCCTCACCAACGAGAAGCGCGACATCCTGGTCAAGCACCTCATCCCGCAGG  
CGGTGCAGCTGCACAAGGAGCGGCTGAAGGTGCAGCAGGTGCAGGGCAAGTGAAGGTGACGGACATGGT  
CGGCGAGATCTGTGGCGACTTCAAGGTGCCGACGGCGCACATCACCGAGGGCTTACAGCAACACCGACTTC  
GTGATGTACGTGCGCTCCGTGCCGAGTGAGGAGGGTGTGCTGGCGTGGGCCACGACCTGCCAGACGTTCT  
CTGACGGCCATCCAGCCGTGGGCGTCAACATCCCCGCGGCAACATTGCGTGCAGGTACGACCAGCT  
CGTCACGCGTGTGTCACGCACGAGATGGCGCACGCGCTCGGCTTACGCGGCCATTCTTCGAGGACGCC  
CGCATCGTGGCGAACGTTTTCGAACGTTTCGAGGCAAGAAGTTCGATGTTCCCGTGATCAACAGCAGCACGG  
CAGTGGCGAAGGCGCGGAGCAGTACGGCTGCGACACCTTGGAGTATCTGGAGGTGGAGGACCAGGGCGG  
TGCGGGCTCCGCCGGTGCACATCAAGATGCGCAACGCGCAGGACGAGCTCATGGCGCCTGCTGCAGCT  
GCCGGTACTACACCGCCCTGACCATGGCCATCCTCCAGGACCTCGGCTTCTACCAGGCGGACTTCAGCA  
AGGCCGAGGTGATGCCGTGGGGCCAGAACGCCGCTGCGCCTTCTCACCAACAAGTGCATGGAGCAGAG  
CGTCACGCAGTGGCCGGCGATGTTCTGCAATGAGAGCGAGGACGCCATCCGCTGCCCCACCAGTCGTCTC  
CTCCTCGGAACGTGTGGTATAAGGGAATACGAACCGCCGTTGCCGCGATACTGGCAGTACTTCACCAACG  
CGTCTCTTGGGGCTACTCGCCATCCTGGACTACTGCCCGTTTGTATCGGCTACGCTGATGGCTCGT  
CAATCAGGACGCATCGTCGGCAGAGGAGTTCTTCACTGCATTCAACGTCTTCTCTGACGCGGCGCGCTGC  
ATCGATGGCGCCTTCAGACCGAAGGCAACTAACGGCATAAGTCAAGTCGTACGCCGGCCTGTGCGCAACG  
TGCAAGTGTGACACGGCCACACGCACGTACAGCGTGCAGGTGCACGGCAGTAACGACTACACCAACTGCAC  
GCCGGCCCTCAGAGTTGAGCTGAGCACCGTGAGCAAACTTTCGAGGAAGGCGGCTACATCAGTGGCCG  
CCGTACGTGGAGGTGTGCCAGGGCAACGTGCAGGCTGCCAAGGACTTTGATGGCGACTCCGACAGCTCCA  
GCAGCTCCAGTGACGCTGCCGACAAGGCGGCGATTGAGCGGTGGAATGAGAGGATGGCCGGCCTGGCTAC  
TGCGGGCAGCGTGTGCTAGGAGTAGTTCTCTCTCATGGCACTCGTGGTGTGGCTACTGCTTGT  
AGCTGCCCCAGGTGGTGTGCAAAGTTGGGGGGCTCCCGACGTGA

>AF044679 27, 626 TSA

ATGTCCGTGGACAGCAGCAGCAGCACCGGCGCCGCTGCGTGCAGCGCGCCTGGTGGCCTCATGCCAACG  
GCAGCTTCAAGAAGATCAGCCTCTCCTCCTACAAGGGCAAGTGGGTGCTGCTCTTCTTCTACCCGCTCGA  
CTTTAGCTTCGTGTGCCGACAGAGGTCATCGCGTTCTCCGACAGCGTGAGTCGTTCAACGAGCTCAAC  
TGCGAGGTCCCTCGCGTGTCTGATAGACAGCGAGTACGCGCACCTGCAGTGGACGCTGCAGGACCGCAAGA  
AGGGCGGCCTCGGGACCATGGCGATCCCAATGCTAGCCGACAAGACCAAGAGCATCGCTCGTTCCTACGG  
CGTGTGAGGAGAGCCAGGGCGTGGCCTACCGCGGTCTCTTTCATCATCGACCCCATGGCATGCTGCGT  
CAGATCACCGTCAATGACATGCCGTTGGGCCGACGCGTGGAGGAGTTCTACGCCCTGCTGGAGGCTTTTC  
AGTTCGTGGAGAAGCACGGCGAGGTGTGCCCCGGAAGTGAAGAAGGGCGCCCCACGATGAAGCCGGA  
ACCGAATGCGTCTGTGCAAGGATACTTCAGCAAGCAGTAA

>AF047497 1, 582 GAPDH

GACGTGCTGCTGCTGCTGGACATGAGCACGAATGCTGAATACTTCCGCTACCAGATGAAGTACGACACGG  
TGCACGGTCCGCCGAGTACACGGTGGAGGCTGTGAAGAGCACCCCGTCCGTGAAGACGCCAGATGTGCT

TGTGGTGAACGGCCACCGCATCAAGTGCCTGAAGGCGCAGCGCAACCCCGGGATCTGCCGTGGGGCAAG  
CTCGGGCTGGATTACGTGATCGAGTCTACTGGCCTGTTACCGACAAGTTGCAGGCCGAGGGTCACATCA  
AGGGTGGTGGGAAGAAGTCTGTGATCAGCGCCCCGGCGTCTGGCGGGCCAAGACGATCGTGATGGGCGT  
GAACCAGCACGAGTACTCGCCGGCGTCCGACCACGTGGTGTGCAATGCGTTCGACGACCAACTGCCTG  
GCCCCATTGTGCACGTGCTGACGAAGGAGAACTTCGGCATCGAGACCGGTCTGATGACCACCATTCACT  
CCTACACGGCAACGCAGAAGACGGTGGACGGCGTGTGCTCAAGGACTGGCGTGGTGGCCGCGGGCGGC  
CGTAAACATCATCCCGAGCACA

>AF058760 631, 1515 mag

ATGCGTGACGGAGTGCACCGCTTCGGCCCTCGCGCGCTCGCTCGCTGCGTTGATTGCGTTGAAGGGCGGG  
GGGGGGCAGAGTGCAGTGCAGACACGCACACAATCCAAGGCACGCTCTCATTACGGCTCGAGCGCCG  
TCCCAGCCGCCATCCCTCTGCCGTGCTGTCCGCGTGCCTGTGGGTCCGCTTGCTCCCCGGTGGCGCGT  
CACGCCATCACGCCAGCCGCGGTTACAGACCCCGCTCAACCCCCCACGGCCACGGCCACCACCACCACC  
CACACACGCACGGACACACACAGCGTCTCCTCGGCGACGTCCCTTGTGCTGCCCCCTGCTGTGCAGC  
ACCCCTGCGCGTCTGTTGTGTGGCTCACAGCAGTGTGCGTGCAGCGCCGACTGGGCGGGCGAAACGACTC  
GCACGGGGGAGGGCGGCCGCTGCTGCTGCTCCCCTGCGCCTTGCTGTGCGATTGTTGGGGTGGCCCC  
TCTCCACGGGGCCCTCGTGGGGACGCTGCGGCCTCTCGTGAAGGACGGGCGTGCACGCGGGCTCCGATG  
GGCCCCCTTGTCTCTGCGCCTGGCTTGCTGGCCTCGCTCAGTGTCCCGCGGCCAGCCGTGCTGCGTCAGC  
GCACCCCTGCCAGCTCATGCGAACTGCGCACCCGTCAAGAGGCGACGGTGGCGAAAGGCGCGCTGTGG  
CACGAGCACACGCGCTCACTGCTGCCGTGGTGCCACTCGCTTTCTTGGTCCCTTGATGCAGCGTG  
CCTGCCTCGCTCTCAGCGAGGCGAAGTACTTTGCGAGGGGCGGACGGCAGGAGCGCAACCAAAACTGCA  
CAGAAGACGCGTGTGTGCGCGTGGCGGTGCCGCTGGTGGTAG

>AF060886 385, 1092 aprt

ATGTCCCTCAAGGAAATCGGACCCAACTCTTTACTGCTCGAGGATTGCGACTCCTTGTGCGAACTGCTAA  
AGAAGAACTACCGCTGGTACTCCCAATCTTCTCCCCACGCAACGTCCCTCGCTTTGCCGATGTCAGCAG  
CATCACCGAATCTCCAGAGACGTTGAAAGCTATTGCTGACTTCTTGTGAGCGGTACCGCACCATGTCG  
CCAGCCCCAACGCATATCCTAGGCTTCGATGCTCGCGGCTTTCTCTTTGGCCCCATGATCGCCGTCGAGC  
TCGGAATCCCGTTCTGATGCGCAAGGCGGACAAGAATGCTGGTCTCCTTATCCGAAGTGAACCGTA  
CGAAAAGGAGTACAAGGAGGCCGCGCGGAGGTCATGACGATCCGCCACGGCAGCATCGGCAAGAATTCG  
CGTGTGGTGTAAATCGATGACGTTCTGGCAACGGGTGGAACGGCGCTGTGCGGGTTGCAGCTGGTGGAGG  
CAAGCGGTGCAGAGTTGTGAGATGGTCTCGATCTTGACCATTCTTTCTGAAGGCGCGGAGAGGAT  
TCACTCTACCGCTGGCGGTGATAACAAGAAGTTAGGTTTATCGGTCTTCTCTCTGAAGACGTGCTGACA  
GAGGCGAACTGTGGAGACTTGAACGACTACACTGGTCCCCTGTGCTGAGCTGCAGCGATCTACTGGTGA  
ACCAGTAG

>AF062379 1, 1134 RAD51

ATGCAGACCCGTTCCAAGGCCAAAGTTCGCCGTGGTCCGTCCGTCGGCGGGCCCTCTGAAGAGGTTGAGG  
TTGTGGAGAGCCAGCCGAGGAGTCCCTACAGAACGAGGAGCAGGAGCCTCAGCAGCAGCAGCAGCA  
GAGCACCGACATGGCTGAACCGAACGCAAGTGGCTTTTCGCGTTATCCAGATCTTGGAGAACTACGGCGTG  
GCCAGCTCAGATATCAAGAAGTCTATGGAGTGGCGCTTTTACACGGTGGAGTGGCGGCCTACGCACCGA  
AGAAGGCCATCCTGGCAGTGAAGGGATCAGCGAGAACAAGGCCGAGAAAATTATGGCGGAGTGGCGCAA  
GCTGGTGGCGATGGGGTCACTTCCGCGGTTGCCTACCACGAGGCGCGCAAGGAGATCATTATGGTCACT  
ACGGGCAGCCGAGGTGGACAAGCTACTCGCGCGGCATCGAAACTGGGAGCATCACGGAGCTCTTCG  
GAGAGTTCCGTACGGGCAAGACACAGCTCTGCCATACGCTGTGCGTGACGTGCCAGCTGCCATCTCACA  
GGGTGGCGCGGAGGGCATGGCGCTCTATATCGACACCGAAGGCACCTTCCGCCCCGAGCGCCTCGTTGCC  
GTTGCGGAGCGGTACAAGCTGGACCCGAGGATGTGCTCGCTAACGTGGCGTGTGCGCGTGCCTTCAACA  
CGGATCACCAGCAGCAGCTGCTGCTGCAGGCGTCTGCCATGATGGCCGAGAACCGCTTCGCGTCTCATAT

TGTAGACTCTGCAACCGCTCTCTACCGCACAGACTACAGCGGCCGCAACGAGCTCGCGGCGCGGCAGATG  
CACCTCGGCAAATTCTTGCGCTCGCTGCACAACCTCGCCGAGGAGTACGGAGTGGCGGTGGTTGTGACAA  
ACCAGGTAGTGGCCAAACGTGGACGGCTCCGCGCAGATGTTCCAGGCGGACTCCAAGAAGCCGATTGGAGG  
CCACATTATGGCCCACGCCTCGACGACGCGGCTTAGCCTGCGCAAGGGTCGTGGCGAGCAGCGCATCATA  
AAGGTGTACGACTCTCCATGCCTGGCCGAGGCCGAGGCGATCTTTGGCATCTACGATGATGGCGTTGGTG  
ATGCTCGGGATTGA

>AF062380 1, 1095 DMC1

ATGCAGCAGCAGCAGCAGCAGCAGCGGCAGCACAGTTCGCACTTCGCGGAGGAGCGCGTGGTGACCGCG  
GCGCCGCTTCGAGAGCCTCAGCCACTCCACAACCTCGGTACCGGGCAAGCGGCGGACAATCTCTGCT  
CGAGGTGGAGCGTCTTGCGGAGCACGGCATCGGGGCCGAGACATTACAAAGCTGAAGCAGGCGGGGATC  
TTCACGGTGCCTGGTGTGCAGATGCAGTGTAGGAAAGACCTCATTAGATCAAGGGCCTCTCCGAGGCCA  
AGGTGCGACAAGATCATCGAAGCTGCGCGGCGCGTGAGCGAGGTGGGCTTCATCACCGGCTCCAGCTGCCT  
GCAGCAGCGCAGCACTCTTCTGCGCATCTCCACCGGAGTACGGCGCTCGATCAGCTGCTCGGTGGCGGC  
GGTATCGAGAGCCGCTCCATCACGGAGGCGTTCCGGGAGTTCGCGACCGGCAAGACGCAGATCGGGCACA  
CCTTGTGCGTGACCTGTCAGCTGCCGCTGGAGATGGGCGGCGGCAACGGAAAGGCGGTGTACGTGGACAC  
CGAGGGAACGTTTCGCCCAGGCGGATTCCGGCCATTGCAGAGCGCTTCGGGATGGACTCAAACCTCCGTG  
CTGGACAACATCCTTGTGCGCCGCGCCTACACGCATGAGCATCAAGCTCACCTGCTATCGATGGTGGCGG  
CCAAGATGGCGGAGGATCAGTTTAGCCTGCTCGTCGTAGACAGCATCACGGCTCTCTTCGCGTTGACTT  
CTCCGGCCGCGGCGAGCTCGCCGAGCGGCAGCAGAAGCTGGCAAAGATGCTGAGCCAACTGATAAAAATC  
GCGGAGGAGTTCAACATTGCCGTGTACATACCAATCAAGTAGTCTCCGACCCCGGTGGCGCCTCCATGT  
TTGTGGCGGACCCAAAGAAGCCCGTCGGCGGCCACATCCTCGCCATGCGTCGACGACGCGCCTGTCGCT  
GCGCAAAGGGCCGCGGCGATCAGCGCGTGTGCAAAATATTTGATAGCCCATCGTTGCCGAGCTCGAATGC  
GTGTACAGCATCTCTGAGCAGGGGATCATTGACGCGGTCAATGA

>AF067495 1303, 4446 CA1

ATGAACTTTGAGACGAACAAGGCGACGAGCCAACCTCCCGATGCGTACGACGCCAAAGACAAGTTCTGGG  
CGTTGGCGCTGGAGAACGCTTCAACCTCGTGCAGTTGGAGGACCCCTCGCTGGTATCGATGCCGCCGA  
CGCACCGCGCCATGCCAAGGAACTCGGCGACAACGTCATCCCAATCAAGGGCGGCCCGAGTTGGATTGTT  
ATCTTGGCGAGCCAGTTCAAAAACGCCATCACGATTGTTCTGCTGATCGTTATTATCATCAGCGGTGTGT  
TTGGGACTGGGCTGAGTTTCGGCGTCTTCTCTTATCCTCTTCTTTAACGCCCTTGCTTGGCTTCTACCA  
GGAGTACGGCGCCGAGAGTTCGCTGGCGAGTCTCAAGCAAATGACGGCAGGTGTGGCGAAGGTGATACGT  
AATGGCATTCCCAGATCATCTTCATTGACGAGTTCGTCGTCGTTGACGTCATCGTGCTCGAGCAGGGCG  
CCTCCGTGCCGGCTGACTGTGCAATTTTCGAGTCAACGGGCTAGAGGTGGATGAGGCTCTGCTGACGGG  
CGAGGCGTACCGGTGGTGAAGCACGCAACGTCATTCCGACCCGGAAAACCGCCTCGCTCTTGGCGAC  
CGCAAGAACATGGTGTACCGCAACACGCAGGTGACGCAGGGCCGCGGCAAGGCGGTGGTTCGCGCGGTG  
GTCTGAACACCGAAATGGGCAAACCTTGCAAAGCGGCTGAACGACAGCAAGGGCAGTGGCAAAGACGGCGCT  
GATGAAGAAGCTCGACTACATGATGTACTTCCCTGTTCCCTTTGCTGTGCCGTTGCCCGGTGATCGTGTTC  
GCGGCCAACAAGATGCGCTACACGCCGCAACCCTCTCGTACGCCACGGCGGTGGCCATTGCCATTCTCC  
CCGAGTCGCTTTGCGCCGTCATCACGGTTGCCATGACCTTCTCTGTGAAGCGCATGGCACAGCAGAAGTG  
TATTGTGCGCAAGCTGCCGGTGTGGAGGTGCTGGGCAACGTCACAGACATCTGCTCCGACAAGACCGGG  
ACGCTGACGGAGAATAAGATGGTGGTCAAGAAGGCGGTGATTGGCGTTGACGACGTGTACAGCGTTGGCG  
GCGCGCCGTACGACTCACGGCGACTTCTTCCCGCCATGCGAAAACGGCCAGGAACAACAGCCCGTGAA  
CATGGCCCATCAGCAGGAGGTGCGCTACATCTACCAGTTTCTCAAGTGTGCCGCCCTCTGCAGCACAACG  
GTCCTGCATGTCTCTGAAGAGGACATGGACTCCCTCGCTGGCAAACGGCAACCCGACCGAGATTGCCATCC  
AGGTAATGACCTGGAAGGCCGGCCTAAACCGGACAAGCTGGAGGAGGAGGGCTGGGAGTGCATCACGGA  
GTACTCTTTGACTCTAAGATCAAGCGTATGTCCACGGCATGGGAAAACAAGGCGAAGCGCGAGCTCTAC

CTCTGCACCAAGGGCGCCCCGAGCGGGTCGTTGAGCTGTGCACGTACAAGATCAGCGAGGATGGCAAGC  
TTGTCAGCCTGACGCAGCAGGACCGCGAGCAGGTCGACCAGCACATCCGTGACTTGGCCGCGCAGGGTCT  
ACGCACCATCTGCTTTGCATACCGCGAGGACGCCACGAAGATCTTCCCGATCCCGGCTGAAGAGCCGTTT  
ATCGACGCTTACGACCGCGACCAGGTCGAGCGCGACCTCGTCTTCCCTGGGTATTGTGCGCATCTACGACC  
CGCCCCGCCCCGAGTCTCGACCGTCCGTGCTGCGCTGCCAGCACGCCGGCATCTGCGTGCGCATGCTCAC  
GGGTGACCACACGTCCACCGCCGGCAGCATTGCCTCGATGCTGAACATCATTGCGCCGCGGACCTCGAC  
GACCCGGTGAAGCTGCAGGCGGGGCCTGACTTCGACAAGGTCGACCCTGAGACGATCGACGGCTGGGCCG  
ACCTCCCCGTCGTCGTTGGCCGCTGCTCTCCCGAGTCGAAGGTGAAAATGATCGAGTCGCTGCACCGCCG  
CAAGAAGGTGGTGGCCATGACGGGTGACGGTTC AACGACTCCCCAGTATCAAGATTGCCGACATTGGC  
TGCGCTATGGGCTCCGGCGTCGACGTGACGAAGGGCGTCGAGATCTCGTCATCACTGATGACAACTTTG  
CCACCATCGTGAAAGCTGTCGCCGAGGGACGCCGCATCTCGCAGTGTATCCGCAAGTTTGTGTACATCT  
GCTGTGAGTAACGTGGCTGAGGTGATTGCGCTGATCTGCGGCCTGCCTATCAGCCACGGCGGGAGTCCG  
GTGTTTATCCTATCCCCATCGAGATTCTGTGGCTGAACATGTTACCTCGGCCCCACGGCGACGGGTC  
TGTCGCTCGACAGGGCGACGGACGACATTCTGCAGGTGCCGCCAACACGCAGGGATTCTTACGATTGA  
GCTGATTGCCGACACAGTCGTTTACGGGTTCTGGCTCGGCGCCATCACTCTGTGTGGCTTCGCGGTAGTG  
CTTTACGGCTTCAAGAGCGGCCCGGAGGGGACAGACTGCAACAGGCACAACGGCGTCGGCTGCGACAACA  
TCTGGACCGCCCCGACGACCGCCTTTGGAATTCTGTACTTTGGTTTGCTGATCCACTCCTACAGGTGCG  
CCACCCGCGCGTCTCCATCTT CAGAATGCGCTGGCTCGACAACAAGTGGATCTTCCGTTCTGCGTCTG  
GGCGGTGCGCTGTTTGTGCCGATTGTATACATCAACCGGATCGCCCATGGCCTCTTTGTACACAGCATGA  
TCACTTTGGGAGTGGGGCGTCATTGCGGTGCGGTCATGACCTTTCTCGCCATCTGCGAAACCTACAAGT  
GATCAAGAACCTGATCTTCCGATCCGCAAGGTGCTGGTGGAGGTGGACGAGGAGGAGGCCGAGGATGTC  
GAGGAGCAGCGCCAGCGGAGTACAACACCTTTACCCGCACCATGCCGGACGATCGCAACGTGGAGAGGA  
TCGCAAACGAGAACCTGCGCATGTCGTTTGCCTCTCTCGCCGGCAGCGTGGCCACCGCCAACACAGGCTC  
CTTCCGTGTGCCCGCGCAGCGCCAGAAGAAGAAACGTATTGGGCTCTTCCGCAAGCGCGAGTAA

>AF067496 714, 4184 APLT1

ATGCGACAGATACGCTACCGGGCGCTGCACAACGGTGCTGATGAAGACGCGCGAAGTCGCAACAGCAGCA  
CCCCAATATCTCCACGAGCAGCGCACATGGTCCTCAGCTGCCACAGCGGCACTGCTGTCGGCCACGTGA  
TTTCGTGTTTGACGACTCCCTCAGCACTGGCGCGGCGGTGTCAGTGTGGCCATTCCACAGCAGAAGAAA  
CACAGTGTGCGACGGTGGCTGCAGGAAATGTTACATCTGCCGATCGCGCCGTCTCTCGACAACCGCCAAA  
TCCCGTTTTGGTACTTCCCTGGCGAATGGTCGCCGGTCGGCTATCCGAGCAACGGGTGAGCAACCGTCG  
CTACACGCTCTCCACGTTTCTGCCGCTGGCGCTGCTCCGT CAGTTT CAGA ACTTCTTTAACCTCTTCTAC  
CTCTTTCTGGCCTTCTCGCAGGTCATTCCAGTGCTGAAAGTTGGCTTCATCTTCACTTACTTTTACCCGC  
TAGTAATGGTGGTGTGCTCTCGCTGATGAAGACGCGCTCGATGAGTGGAAAGCGATTCCGGCGCGATCG  
CATCGCCAACGTGAGGTGTTGAGAAACTCACAGGCGGCGGCGACGTGGTTCACGGTGGGTCGTTGCACAC  
ATTCGGGTAGGAGATCTGCTCATCTGCATCAAGATCAACGGGTGCCGGCCGACTGCGTCGTGTTGCACA  
CCTCCGAGAAGTCCGGCAGGACGTTT CATTTCGTACCGACCAACTTGACGGCGAAAACGGATTGGAAGCTGCG  
CTACCCGTTGAACTCTACCAAGGGTCTAGGATACGCCGAACTTGGTGCCTGCGCTTCAACGTGCACTGTG  
GCGCGCCTCACAAGACATCTACAGCTTCCCGGCACCCTCGAACTGGCCAACGGACAGAGCGAGTCGAT  
CACGATGGAGAATGCCGTCGTTGCTGCTGTGTGGTGGCGACGGGGACGCTGGTGGTTGCCGTCCTATAC  
ACGGGTAGGAGACGCGCAGCCCTCAACTCGACAAGCCCGCGTAACAAACTTGGCCTCATCGAGCGGAG  
CTCAACCTAATCGCGGTTCTGTGCTTCCGCGCTGCTTCTGATCCTTTCTTTCTTCTCGTAGCGCAACAGC  
AGTTCCGTGGCGACTTTGCCGTCATGTTCTGTGCGCTTCTTTCATCCTCCTCTCGTCCATGATTCCCATCTC  
GATGCGCGTGAACGTAGACGTCGGCCGCTCTGGTACTCGTACGATATGTGCGATGACCCCAACATCCCT  
GGCGCCGTGGCTCGCAACGCAAACCTTCCGGAGGAATTGGGTGCGCTGCGCTATCTCTTCTCCGACAAGA  
CCGGCACACTCACAAGAAACAAGATGAAGTTTCCGCTGATGCAGGTGGGACCGGACACGGTGCTAACGGA

CCGCTTCACTGATCAGCTGGCGGGCGCGCTGCAGGAGTACTTTGGCACAGGCAACTGGGGAGCCGGGGCT  
CGGCTCATGCTCAGCAACGTCTCCGCGGAGTCAGCGTGAGAAATTCGAAGCAATGGAGCCGTGATGTGC  
AGCGCGTTGGCGACCTTATCAGAGCCATTGTCCTGTGCCACAATGTGAGCCCAGTGGTGATGGAGGAGCC  
GTTGGCCCTTGGTACCGACGACGAAACAACGGCACTGGGTGCGGGTGGCGCTGCGGCTGTGCCGGCCACA  
ACCGATATGAGGAGTCAGCCGACTGACTACCAAGCCTCCTCGCCAGACGAGGTTGCGCTGGTCAAGTTCT  
GCGGCTCCCTCGGTATTGTCCTGACCTATCGCGATCTCACAACGATCGCCTTCACCGTTGGCGGCGGTGC  
GCAGCTGCACACGTGCACAATCGTCAAACGTTCCCGTTCTCGTCGGAGCGGAAGTGCATGGGCATCATC  
CTGCGGAGCGCACTGGGAGCTGCAGTGGCGGCAGCTCACAGGAGACCGTCAAGTTCTACATGAAAGGCG  
CAGACGTGAAGATGGCGTCGGTGGTGCGCCAATCGGAGTGGCTGGAGGAGTGTGCCAGGAGCTGGCGCA  
GATGGGCCTGCGAACGCTCGTGTGTTGCCAGTCAACGCTCAGCGAGGAGATGCTCGGCGCCTTCCTGCAG  
CAGTACGAAGCCGCCATTTCAATCCTTGGTGAAGGTGCGCGCAGCAGCAATCGAGGCGGCGATGAAGCTAT  
TGGAGACGGACATGACGCTGACAGGGGTGACGGGGTGGAGGACGAGCTGCAAGACGACGTTGTCGTCTG  
TCTCGAGACGCTTGGCATGTGTGGCATCAAGGTGTGGATGCTCACGGGTGACAAGGTCGAGACTGCCATC  
ACCATTGGCCGCTCGACTCGGCTCATTCCCGCCACTGCCGCATCGAGTACCTGTGTGGGATGGCCCCGG  
CAGACATTGGTCACCGCTGCACGAGCTGCAGGAGGAGTTTTGCTGGGGCGTGACGTGCGGCAGCATAGT  
GCCGCCATGGACGCTGGTCTGGATGGAAACGCCCTGGCGTACTGCCTCTCCCACGCCTCCTTCTTCGCG  
GACGTGGCCAGAACCGCCTACTCGGTTATAGTGGCGCGATGCTCCCCGACGCAGAAGGCTGCGGTGTTA  
CTGTAATGCGTGATAGCTGTCGTGACGCGCGCTCGCGGCGATCGGTGACGGAGGCAACGATGTGTCGAT  
GATTCAGGCCGCCAACGTGGGGATCGGTATTGAGGGGTTGGAGGGGAAGCAAGCAAGCATGGCCGCTGAT  
TTCTCCATTACGAAGTTCTCTCACTGTCTACGACTGATCATGTGGCATGGGCGGAACTCGTACCAGCGCA  
CGTGCCGACTCAGCCAGTTCATCATGCACCGCGGCATCGTCTACTCGGTTGTGCAGACGGTCTTCTCGGT  
GCTGTTTGGCCGGACGACCATGTCTGTCTTCAACGTTATCTACTAATGGGGTACTCCACCGTATTTACC  
ATGGCGCCAGCCTTCGCATTGGTGTCTCGACGAAGACTTCAACGAGTCCGACGTGCACGAGTACCCGTTTC  
TCTACAAAGATTTGCTCAAGGCCCGCTCCATGAACACCCGCACCTTTCTGCAGTGGGTGTGGGCATCGTT  
CTTCCAAGGAGGGGTGATGATGCTGATGGCGCTACAGCTCTTCAAGTCCGACATGTTCCAGATTGTCACG  
ATCGCCTACACATCGTCTCTCATCCGAGCTGGCCATCGTTGGCGCCACCGGCATCTTCGCATTCTCT  
GGCGAGAGCGCCGTGCTCGTCTTTCTCTTCTTGTGCTCTGAGGTGGTGTCTCTGCTGATGTTTTTCT  
CGCCGTGTCGTGTTGCCGACACGTTTCGATAGAGACTTTTTCTTTTCGTGGAGCTGCTGGTGGCGCGTC  
GCGGTAATCTGCCTAGCCAGCATTGCACCACTCATGATATTTCAAATGGTTGGCAAGTACATATTGTTCA  
ACCCGCGCATCGCCGTTTCTGCTGATGGGATGTCCGACGTGA

>AF069386 135, 734 peroxidoxin

ATGTCTGCGGTAACGCCAAGATCAACTCTCCGCGCCGTCCTTCGAGGAGGTGGCGCTCATGCCAACG  
GCAGCTTCAAGAAGATCAGCCTCTCCTCCTACAAGGGCAAGTGGGTGCTGCTCTTCTTCTACCCGCTCGA  
CTTACCTTTCGTGTGCCCGACAGAGTTCATCGCGTTCTCCGACAGCGTGAGTCGCTTCAACGAGCTCAAC  
TGCGAGGTCTCGCGTGTGATAGACAGCGAGTACGCGCACCTGCAGTGGACGCTGCAGGACCGCAAGA  
AGGGCGGCTCGGGACCATGGCGATCCCAATGCTAGCCGACAAGACCAAGAGCATCGCTCGTTCCTACGG  
CGTGCTGGAGGAGAGCCGGGGCGTGGCCTACCGCGGTCTCTTTCATCATCGACCCCATGGCATGCTGCGT  
CAGATCACCGTCAATGACATGCCGGTGGGCCGACGCTGGAGGAGGTTCTACGCTGCTGGAGGCTTTTC  
AGTTCGTGGAGAAGCACGGCGAGGTGTGCCCCGGAAGTGGAAAGGGCGCCCCACGATGAAGCCGGA  
ACCGAAGGCGTCTGTGAGGGATACTTCAGCAAGCAGTAA

>AF073381 421, 1356 CRK3

ATGTCTTCGTTTTGGCCGTGTACCGCCCGTAGCGGTGACGCTGGGACGCGTGACAGTCTTGACCGGTACA  
ATCGCTTGATGTTTTGGGAGAGGGAACGTATGGTGTGTGATCGCGCGGTGACAAAAATCACTGGGCA  
GTACGTTGCTCTCAAGAAAGTGGACTCGATCGCACTGAGGAGGGCATTCCGCAGACTGCGCTGCGCGAG  
GTGTCGATTCTACAAGAGTTCGACCACCCCAACATTGTGAAGTTGCTTGATGTCATTTGCTCGGACGGGA

AGCTCTACCTTGTCTTCGAGTATGTGGAGGCGGACCTGAAAAAGGCGATTGAAAAGCAAGAGGGTGGATA  
CTCTGGAATGGATCTGAAGCGGCTTATTTATCAGCTTTTAGACGGCCTTTACTTTTGCCACCGCCATCGC  
ATCATCCACCGTGATCTGAAGCCAGCCAACATCCTCCTGACATCAGGGAACGTCTTAAATTGGCTGATT  
TCGGTCTCGCCCGTGCGTTCCAAGTGCCCATGCACACCTACACGCACGAGGTGGTTACACTGTGGTACCG  
TGCCCTGAGATCCTCCTCGGTGAGAAGCACTACACTCCTGCCGTGGATATGTGGAGTGTGCGGTGTATT  
TTCGCTGAGCTAACGCGCGAAAGGTTCTTTCCGCGCGATAGCGAAATCGGGCAGTTGTTCGAGATTT  
TTCAAGTGCTGGGGACCGGACCGGACACCGAGGGGTCTGGCCTGGTGTGTGCGCGGTGCCCGACTACCG  
CGACGTATTTCCAAGTGACTGCAAAGCGCCTGGGGCAGTACTACCAGAACTTCATCCGGACGCTATT  
GATCTGCTCTCCAAGATGCTCAAGTACGATCCGCGGGAGCGCATATCAGCCAAGGAGGCCCTTCAGCACC  
CGTGGTTCAGTGACCTTCGCTGGTAG

>AF083881 917, 1495 mar1

ATGCCTCGCTTGATGCCGATTATTCTACGAGCAAGACAGCGTTTCTGTGCGTAGATCTCCAAGAAGCGT  
TCAGTAAACGCATCGCCAATTTCCGAATTGCGTGTTCGTTGCCAACCGGCTCGCACGCCTGCATGAGGT  
GGTTCCCGAAAAACCAAGTACATTGTACGGAGCAGTATCCGAAGGGCCTTGCCACATCGTGCCGGAG  
ATTACTTTGCCCCAAGTGCCACGTGATCGAGAAGACCCGCTTCTCGTGTGTTGTGCCACAGATGGAGG  
AGCTGCTGAAGGACGTGGACAATGTTGTGCTCTTCGGTATTGAGGGGCACGTCTGCGTCTGCAAACAGT  
GGCCGACCTCTTGACATGAATAAGCGTGTGTTCCCTTCAAAGGACGGCCTGGGCAGTCAAAAAGACGACA  
GACTTTAAGGCCGCGATGAAGCTGATGGGTTTCATGGGGACCCAACTGCGAGATCACACCTCTGAGTCAA  
TTCTTCTTCAGATGACAAAGGATGCCATGGACCCTAACTTCAAGAAGATTTTCAAGCTACTGAGGGAGGA  
GCCTCCCATCCCCGCTCTAA

>AF093062 263, 1945 PAB1

ATGGCTGCTGCTGTCCAGGAAGCTGCTGCCCCGGTGGCGCATCAGCCGCAGATGGACAAGCCGATCGAGA  
TCGCTTCCATCTACGTTGGCGACCTTGACGCCACCATCAACGAGCCGCAGCTGGTGGAGCTCTTCAAGCC  
GTTCCGGACCATCCTGAACGTGCGTGTGTTGCCGCGACATCATCAGCAGCGCTCGCTGGGCTATGGCTAC  
GTCAACTTCGACAACCACGACAGCGCGGAGAAGGGCATCGAGTCCATGAACTTCAAGCGTGTGCGTGACA  
AATGCGTACGCCATTATGTGGCAGCAGCGGACCCCGCCCTCCGCTACAGCGGCAACGGCAACGTTTTTCGT  
GAAGAACCTGGAGAAGGATGTGGACAGCAAGAGCCTGCACGACATCTTACCAAGTTCGGCTCGATTCTC  
TCCTGCAAGGTAATGCAGGACGAGGAGGGCAAGAGCCGCGCTACGGCTTCGTTCACTTCAAAGACGAGA  
CGTCCGCCAAGGACGCTATTGTGAAGATGAACGGCGCTGCCGATCACGCCTCAGAGGACAAGAAGGCGCT  
CTACGTGGCCAACTTCATTCGCCGCAATGCACGCCTTGCCGCGCTCGTGCCAACTTCACGAACGTGTAT  
ATCAAGCAGGTGCTGCCGACCGTGAACAAGGACGTATCGAGAAGTTCTTCGAAAAGTTTGGCGGCATCA  
CGTCCGCTGCAGCCTGCAAGGACAAGAGCGGCCGCGTGTTCGCCTTCTGCAACTTCGAAAAGCACGACGA  
CGCCGTCAAGGCGGTTGAAGCGATGCACGACCATCACATCGACGGCATCACGGCACCTGGTGAGAAGCTG  
TACGTACAGCGCGCCAGCCGCGCAGCGAGCGCCTCATTGCCCTTCGACAGAAGTACATGCAGACCAAG  
CCCTTGGAACAACCTGTACGTGCGCAACTTCGACCCTGAGTTCACGGGCGCGGACCTGCTCGAGCTCTT  
CAAGGAGTATGGCGAGGTCAAGAGCTGCCGTGTGATGGTGTGAGCGAGAGTGGGGTGTGAGCCGCGGCTTCGGT  
TTCGTGAGTTTTTCGAACGCCGACGAGGCCAACGCCGCTCTGCGCGAGATGAATGGTTCGCATGCTGAACG  
GCAAGCCCCTCATCGTGAACATTGCCAACGCCGCGATCAGCGCTACACAATCGTGCGCCTGCAGTTCCA  
GCAGCGCCTGCAGATGATGATGCGTTCAGATGCACCAGCCGATGCCGTTTTGTGCGGACCCAGGGCCGTCCG  
ATGCGTGGCCCGGTTGGTTCGCCAGCAGCTGGGTGGTTCGCGCGCAGGGCCATCCGATGCCGATGCCATCAC  
CACAGCAGCCGAGGGTGCCGCGCAGCCACAGGGTTTTGCCACGCCGTCGGCAGTCCGTTTTGTGCAAGC  
GACGCCGAAGCACTCCCCTGGCGATGTCCCCGAGACGCCGCGCTGCCGCGGATCACACCACAGGAACTC  
GAAAGCATGTGCCCCAGGAGCAGCGCGCCGCTTGGGTGACCGTCTCTTCTAAAGGTGTACGAGATTC  
CGCCAGACGTGGCGCCGAAGATCACGGGTATGTTCCCTCGAGATGAAACCCAAGGAGGCGTACGAGTTGCT  
CAACGACCAGAAGCGACTCGAGGAGCGGTGACAGAGGCGCTATGCGTGTCAAGGCGCATCAGACGGCG

TAA

>AF099106 1, 1086 p45

GATGAAGAAGAGGAGGACACCACCATCAACAACCTCCGACGTGGTGGTGGCTACAAGAAGGCCGCAACGT  
GGTGCAATGAAACGTTGCGCGTGCTTATCGATGCCACAAAACCTGGCGCCAAGGTGTGCGACCTGTGCCG  
CCTCGGTGATGACACCATCACCGCCAAGGTCAAGACAATGTTCAAAGGCACGGAAAAAGGCATCGCTTTC  
CCGACCTGCATCTCGGTCAACAACCTGCGTATGCCACAACAGCCCTGGCGTGTGCGACGAGACGACGCAGC  
AAGAGATCGCGATGGGTGACGTGCTGACTACGACCTGGGCATCCACGTGGACGGCTACTGCGCCGTGCT  
CGCGCACACCATTCAAGGTGACAGAGGACAATGAGCTTGGCAAGGACGAGAAGGCCGGCGCGCTCATTACA  
GCGGCGTACAACATCCTGAACACGGCGCTGCGCCAGATGCGTCCCGGTACGACCATCTACCAGGTGACAG  
ACGTAGTTGAGAAGGCTGCGGAGCACTACAAGGTGACTCCGGTAGACGGCGTCCCTCTCGCATATGATGAA  
GCGCTACATCATAGACGGATACCGCTGTATCCCGCAGCGCAGGGTTCGCGGAGCACATGGTGCACGACTAC  
GATCTCGAGAAAAGCGCAGGTGTGGACGCTAGACATTGTCATGACCTCCGGCAAGGGCAAGCTGAAGGAGC  
GCGATGCGCGCCGTGCGTGTCAAGGTGGCTCTGGACTCCAATACTCTGTGAAAATGGAAAGCGCGAA  
GGAGGTTTCAAGGAAATCGACTCCAAGTATGCCACCTTCCCCTTTGCCATCCGCAACCTGGAGGCCAAG  
AAGGCCCGCTCGGTCTCAACGAGATGGCGAAGCAGGTGCTGTATCCCGTACCCTATTCTCTTCGAAA  
AGGAAGGCGAGGTGCTCGCCATTTCAAGATTACGGTGTCTATCAGCAACAAGAAGATTGAGCCGATTAC  
CGGCCTGAAGCCGAGAAGGCCCGGCGCTCGAGCCATACACGGACGAGATGCTGCTTGGACGAACAAG  
CTCTCGCTGTGCTAGAGAAGAAGGCCGCGAAGTAG

>AF099107 70, 645 p21

ATGAGCATTATCAAGGAGGACGACGCCGTGGGCTGCTACATGACGGTGACCCTCGTGGACGACACCAAGG  
TGGAGGGTACCATCTTCACTACAATTCCAAGGAGGGCATCATAGTACTCCTGTCCCTCCGCGACGATCA  
GACGAACATGAAGCTAATCCGCACTCCGTACATCAAAGACTTCAAGCCTTTCACACGCTGAGGAGGGAGCG  
CACCTGCCCCCGCACTGGACTCCTTCAACGAGCTTCCGTCCATGCACGCCGGCCGCAAGTCCATCT  
TCAAGCACGCCAGCACGCAGCTCAAGAACGCCGAGGCCAACCAGCAAAAAGCACTTCAACTCTGTACGAC  
CGACACACCGATTGCCACACTTGATGCGTACCTCAAGCTCCTGCGGCTATACCCCTTAATTGAGTGGAAC  
AGCGACGAGGGTGTATCCAGGTCTCGGACACCGTCAATTGTCGTAGGAGACCCGACTGGCGGACGCCCA  
AGGCAATGCTGGTGGACGGCGCCCTGAGAAGGACAGACCGCTTGTAGATCGCCTGCAGGTTGCGCTCGG  
AAACGGCAAGAAGTGA

>AF099108 72, 395 H2B

ATGGCTTCTTCCCGCAAGGCTTCCAACCCGCACAAGTCGCACCGCAAGCCGAAGCGCTCGTGGAACGTGT  
ACGTGGGCCGCTCGCTGAAGGCGATCAACGCCAGATGTCGATGTCGCACCGCACGATGAAGATCGTGAA  
CTCGTACGTGAACGACGTGATGGAGCGCATCTGCACTGAGGCCGCGTTCGATTGTTTCGCGCAACAAGAAG  
CGCACGTTGGGTGCGCGGAGGTGCAGACGGCGGTGCGCATTGTGCTGCCGGCGGAGCTCGCGAAGCATG  
CCATGGCTGAGGGCACGAAGGCCGTGTCGAGCGCGTCCCGCTAA

>AF109296\_0 2971, 10930 H1A

ATGAGCTCCAAAAAGTACGAGCTGGACGCCCGCGCTTCGAGGACAAGCCCGAGAGCCATTCCGATGCGG  
AGATGACCCACAGAAGCCTCAGCGCCGCCAGTCTGTGCTGTGCAAGGCCGTGAGCGAGCATGATGAACG  
CGCGACGGGGCCTGCGACAGACCTGCTACCGCGTTCGAAAGGCCTGACGACAGAGGAGGCGGAGGAGCTG  
CTGAAGAAGTATGGGCGCAACGAGCTGCCGAGAAGAAGACGCCGAGCTGGCTGATCTATGTGCGCGGTC  
TGTGGGGCCCCGATGCCTGCCGCGTGTGGATTGCAATCATCATCGAGTTTTCGCTGGAGAACTGGCCCCA  
CGGCGCCATCCTGTTTCGCCATCCAGATCGCGAACCGGACGATTGGGTGGTACGAGACGATCAAGGCCGGC  
GACGCCGTTGCTGCACTGAAGAACTCACTGAAGCCGACCGGACTGTGTACCGCGACTCGAAGTGGCAGC  
AGATCGACGCAGCGGTGCTGGTGCCTGGCGACCTTGTCAAGCTTGTCTCCGGTCCGCGGTGCCTGCGGA  
CTGCAGCATCAACGAGGGCGTGTGACGAGGCTGCGCTAACGGGCGAGTCCGTGCCCGTGCAGC  
ATGGGCCCGGAACACATGCCGAAGATGGGGTTCGAACGTTGTACGCGGCGAGGTGGAGGGCACGGTGCAGT



ACACCGGCTCGCTGACGTTCTTCGGGAAAACCGCTGCGCTTCTGCAGTCTGTGGAGTCGGATCTGGGCAA  
CATCCACGTGATTCTCAGGCGTGTGATGTTCTCGCTGTGCGGATCTCGTTCATGCTGTGCATGTGCTGC  
TTCATCTACCTGCTGGCAAGGTTCTACGAGACGTTCCGCCACGCGCTGCAGTTCGCGGTGGTGGTGTGCTGG  
TCGTGTGATCCCGATTGCCCTGGAGATTGTGGTGACGACGACGCTGGCGGTGGGGTCGAAGCACCTGTG  
GAAGCACAAGATCATCGTGACGAAGCTGTCCGGGATCGAGATGATGTCCGGCGTGAACATGCTGTGCTCG  
GACAAGACGGGGACGTTGACGCTGAACAAGATGGAGATCCAGGAGCAGTGCTTCACGTTGAGGAGGGCA  
ACGATCTGAAATCGACGCTGGTGTGCTGGCGGCGCTTGTGCGAAGTGGCGTGAGCCGCCGCGGATGCGCT  
GGACACGATGGTGTGCTGGGCGGCGGACCTGGACGAGTGCGACAACCTACCAGCAGCTGAACTTCGTGCCG  
TTCGACCCGACGACGAAGCGCACTGCGGCGACGCTTGTGGACCGGCGCAGCGGCGAGAAATTCGACGTGA  
CGAAGGGCGCGCCGACGATCCTGCAGATGGTGTACAACCAGGACGAGATCAACGACGAGGTGGTGGGA  
CATCATCGACAGCCTGGCTGCGCGCGGTGTCCGCTGCCTGTCTGTGGCGAAGACGGATCAGCAGGGCCGC  
TGGCACATGGCCGCATTCTGACGTTCCCTGGACCCGCCGCGCCCGGACACGAAGGATACGATCCGTGCGA  
GCAAGGAGTACGGCGTGGACGTGAAGATGATCACTGGCGACCACTTACTGATCGCAAAGGAGATGTGCCG  
CATGCTGGACCTCGACCCGAACATCCTGACGGCGGACAAGCTGCCGCAGATCAAGGACGCGAACGACCTG  
CCGGAAGACCTCGGTGAGAAGTACGGCGACATGATGCTGTCTGTGCGCGGGTTTGGCGAGGTGTTCCCGG  
AGCACAAGTTCATGATTGTGGAGACGCTGCGCCAGCGCGGTACACGTGTGCGATGACGGGCGACGGCGT  
GAACGACGCGCCTGCGCTGAAGCGCGCCGACGTGGGCATTGCGGTGCACGGTGCACGGACGCTGCGCGC  
GCTGCGGCGGACATGGTGTGACGGAGCCCGTCTGAGCGTGGTGGTGGAGGCCATGCTCGTCTCGCGTG  
AGGTGTTCCAGCGCATGCTGTGCTTCTGACGTACCGTATCTCTGCGACGCTACAGCTTGTGTGCTTCTT  
CTTCATTGCGTGCTTACGCTGACGCCGAAAGCCTACGGCAGCGTGGATCCACACTTCCAGTTCCTCCAC  
CTGCCCGTGTGATGTTTCATGCTGATCACGCTGCTGAACGACGGCTGCCTGATGACGATCGGCTACGACC  
ACGTGATCCCGTCTGAGCGGCCGAGAAGTGAATTTGCCGGTGGTGTTCGTGAGCGGTCATTCTGGC  
GGCGGTGCGGTGTGGGTGCTGCTGATGCTGTGCTGTGGATCGGCCTGGAGGGCTACAGCTCGCAGTACTAC  
GAGAACTCGTGGTTCCACCGCCTTGGCCTGCGCGAGCTGCCGCAGGGCAAGCTGGTGACGATGATGTACC  
TGAAGATCTCGATTTCCGACTTCCCTGACGCTGTTCTCGTCACGCACGGGTGGCCACTTCTTCTTCTACAT  
GCCGCCAAGCCCGATCCTGTTCTGCGGCGGATCATCTCACTACTGGTATCAACGATGGCTGCGTCTGTT  
TGGCACAAGTTCGAGCCGGACAATGTGCTGACGGAGGGTCTCGCGTGGGGCCAGACGAACGCGGAGAAGC  
TGCTGCCACTGTGGGTGTGGATCTACTGCATTGTGTGGTGGTTCGTGCAGGATGTCGTGAAGGTCTTGGC  
GCACATCTGCATGGACCCGTGGACCTGTTCCGGTGTGCTGTCGGACGCTTCCGGCTCCGGGCGGATCAAG  
CCATACAGCGACGACATGAAGGTTAACGGTTTCGAGCCGGTAAAGAAGCCTGCTGAGAAGTCGACGGAGA  
AGGCTCTGAACTCGAGCGTTTCCAGTGCCTGCGACAAGGCACTGGAGGGCCTGCGGGAGGATACGCACTC  
GCCGATAGAGGAGGCCAGCCCCGTGAACGTGTACGTGTCCCGGATCAGAAGTAG

>AF109296\_1 8006, 10930 H1B

ATGAGCTCCAAAAAGTACGAGCTGGACGCCCGCGTTCGAGGACAAGCCCGAGAGCCATTCCGATGCGG  
AGATGACCCACAGAAGCCTCAGCGCCGCGAGTCTGTGCTGTGCAAGGCCGTGAGCGAGCATGATGAACG  
CGCGACGGGGCCTGCGACAGACCTGCTACCGCCGTCGAAAGGCCTGACGACAGAGGAGGCGGAGGAGCTG  
CTGAAGAAGTATGGGCGCAACGAGCTGCCGAGAAGAAGACGCCGAGCTGGCTGATCTATGTGCGCGGTC  
TGTGGGGCCCGATGCTGCCGCGTGTGGATTGCAATCATCATCGAGTTTGGCGTGGAGAACTGGCCCCGA  
CGGCGCCATCCTGTTCCGATCCAGATCGCGAACGCGACGATTGGGTGGTACGAGACGATCAAGGCCGGC  
GACGCCGTTGCTGCACTGAAGAACTCACTGAAGCCGACCGGACTGTGTACCGGACTCGAAGTGGCAGC  
AGATCGACGACGCGGTGCTGGTGCCTGGCGACCTTGTCAAGCTTGCTTCCGGCTCCGCGGTGCCTGCGGA  
CTGCAGCATCAACGAGGGCGTATCGACGTGGACGAGGCTGCGCTAACGGGCGAGTCGCTGCCCGTGACG  
ATGGGCCCGGAACACATGCCGAAGATGGGGTCGAACGTTGTACGCGGCGAGGTGGAGGGCACGGTGCAGT  
ACACCGGCTCGCTGACGTTCTTCGGGAAAACCGCTGCGCTTCTGCAGTCTGTGGAGTCGGATCTGGGCAA  
CATCCACGTGATTCTCAGGCGTGTGATGCTTGGCGTGTGCGGATCTCGTTCATACTGTGCATGTGCTGC

TTCATCTACCTGCTGGCAAGGTTCTACGAGACGTTCCGCCACGCGCTGCAGTTCGCGGTGGTGGTGTCTGG  
TCGTGTTCGATCCCGATTGCCCTGGAGATTGTGGTGACGACGACGCTGGCGGTGGGGTTCGAAGCACCTGTG  
GAAGCACAAGATCATCGTGACGAAGCTGTCCGCGATCGAGATGATGTCCGGCGTGAACATGCTGTGCTCG  
GACAAGACGGGGACGTTGACGCTGAACAAGATGGAGATCCAGGAGCAGTGCTTCACGTTTCGAGGAGGGCA  
ACGATCTGAAATCGACGCTGGTGTGGCGGCGCTTGTGCGAAGTGGCGTGAGCCGCCGCGCGATGCGCT  
GGACACGATGGTGTGGGCGGCGGACCTGGACGAGTGCGACAACCTACCAGCAGCTGAACTTCGTGCCG  
TTCGACCCGACGACGAAGCGCACTGCGGCGACGCTTGTGGACCGGCGCAGCGGCGAGAAATTCGACGTGA  
CGAAGGGCGCGCCGACGTGATCCTGCAGATGGTGTACAACCAGGACGAGATCAACGACGAGGTGGTGG  
CATCATCGACAGCCTGGCTGCGCGCGGTGTCCGCTGCCTGTCTGTGGCGAAGACGGATCAGCAGGGCCGC  
TGGCACATGGCCGCATTCTGACGTTCCCTGGACCCGCCGCGCCCGGACACGAAGGATACGATCCGTGCGA  
GCAAGGAGTACGGCGTGACGTGAAGATGATCACTGGCGACCACTTACTGATCGCAAAGGAGATGTGCCG  
CATGCTGGACCTCGACCCGAACATCCTGACGCGGACAAGCTGCCGCAGATCAAGGACGCGAACGACCTG  
CCGGAAGACCTCGGTGAGAAAGTACGGCGACATGATGCTGTCTGTGCGCGGGTTTTCGCGAGGTGTTCCCG  
AGCACAAGTTCATGATTGTGGAGACGCTGCGCCAGCGCGGTACACGTGTGCGATGACGGGCGACGGCGT  
GAACGACGCGCCTGCGCTGAAGCGCGCCGACGTGGGCATTGCGGTGCACGGTGCACGGACGCTGCGCGC  
GCTGCGGCGGACATGGTGTGACGGAGCCCGTCTGAGCGTGGTGGTGGAGGCCATGCTCGTCTCGCGTG  
AGGTGTTCCAGCGCATGCTGTGTTCCCTGACGTACCGTATCTCTGCGACGCTACAGCTTGTGTGCTTCTT  
CTTCATTGCGTGCTTCAGCCTGACGCCGAAAGCCTACGGCAGCGTGGATCCGAACTTCCAGTCTTCCAC  
CTGCCCGTGTGATGTTTCATGCTGATCACGCTGCTGAACGACGGCTGCCTGATGACGATCGGCTACGACC  
ACGTGATCCCGTCTGAGCGGCCGAGAAGTGAATTTGCCGGTGGTGTTCGTGAGCGGTCATTCTGGC  
GGCGGTGCGGTGTGGTGTGCTGATGCTGCTGTGGATCGGCCTGGAGGGCTACAGCTCGCAGTACTAC  
GAGAAGTCTGGTTCACCGCCTTGGCCTCGCGCAGCTGCCGCAGGGCAAGCTGGTGACGATGATGTACC  
TGAAGATCTCGATTTCCGACTTCCTGACGCTGTTCTCGTCACGCACGGGTGGCCACTTCTTCTTACGT  
GCCGCCAAGCCCGATCCTGTTCTGCGGCGGATCATCTACTACTGGTATCAACGATGGCTGCGTCTGTT  
TGGCACAAGTCGAGGCCGACAATGTGCTGACGGAGGGTCTCGCGTGGGGCCAGACGAACCGGAGAAGC  
TGCTGCCACTGTGGGTGTGGATCTACTGCATTGTGTGGTGGTTCGTGCAGGATGTCGTGAAGGTCTTGGC  
GCACATCTGCATGGACCGCGTGGACCTGTTCCGGGTGCGTGTGCGACGCTTCCGGGCTCCGGGCGGATCAAG  
CCATACAGCGACGACATGAAGGTTAACGGTTTCGAGCCGTAAGAAGCCTGCTGAGAAGTCGACGGAGA  
AGGCTCTGAACTTGAGCGTTTCCAGTGGGCCGACAAGGCACTGGAGGGCCTGCGGGAGGATACGCATGT  
GCTGAATGAGAGTACGAGCCCCGTAACGCGTTCCTCGCCGAAGGTTAAGAAGTAG

>AF109875 1333, 3528 opb

ATGTCGTTCGACAGCTCCGTGCGGCCTCTGCGCAGCCGCCGATCGCCGCCAAGAAGCCGCACCGCGTCA  
AGTTCGGGTACGTGGAGGGTGAAGACCGCGGCCGAACCCGATGAACCCGCGGCTACCGGAGGACCC  
GTATTTTTGGATGCGCGATGACGATCGTAAGGATCCGGCCGTGATTGAGCACCTCAACAAGGAGAAGGTC  
TACTTCCAGGCGCGCAGCGCCGACATTGCGCAGCTGCGCGACGACATTTACGCAGAGCACATATCGACA  
TCAATGAGGACGACATGTCCGCGCCGTACGTGTACGGCAAGTACCGGTAACACCCGCGAGGTGAAGGG  
TAAGCCGTACAAGATTTACTGCCGCGTGTTCACGGACAAGGAGCCGGGCGACGTCGCGGCGAAGAGGTC  
ATCATCGATGTCAACCAGGTCGCCGAGGGCAAAGCGTTCGTGACGTGATGGAGGTGAAGCCGGCACCCG  
CGGAGCATGACCTTGTAGCCTTTTCTGTGGACATGAGCGGTAACGAGGTGTACACGATCGAATTTAAAAG  
GATTTCCGACCCGTCCTAAACCATCGCCGACAAGGTGAGTGGCACCAATGGCGAGATCGTGTGGGGCCG  
GACCACACCTCCTTATTCTACGTGACCAAAGACGAGACGCTGCGCGAAAACAAGGTGTGGCGCCACGTGA  
TGGGCAAGCTGCAGTCGAGGACGCTGCTGCTCTACGAGGAGCAACAACCCGCTGTTCAAGTGCCTTCATGTA  
CAAGGCCGCGGACACAAAACACTTTGCATCGGCTCGCAGTACCCGAGACGGCGGAAGTGCACCTGCTT  
GATCTGCGCAAGGGCAACGCCACAATACGCTGAAATTTGTGCGGCCGCGCGAGAAGGGTGTGCGCTACG  
ACGTGCAGATGCACGGCACCAGCCATCTTGTGATCCTACCAACGAAGGTGGGGCGGTGAACCACAAGCT

TTCATAGCGCCGCGTGGCAGCCGAGCGACTGGTCGCATGTGCTGGTGGATCACAGCGAGGATGTGTTT  
ATGGAGAGCATCGCGGTGCGCTCGAACTACCTCGTCGTGGCAGGCCGCGCCGGGCTGACGCGCATCT  
GGACGATGATGGCGGACTCGCAGGATGGTGTCTTCCAGGCTGGCACCGGGCTGCGCGAGGTGGTATGGA  
GGAGCCGATCTTACGGTGCACCTCGTGGAGTCCCAGATGTTGGAGTACGAAGAGCCGACGTTCCGCATG  
GAGTACTCCTCCCTTGCCACGCCGAACACCTGGTTCGACGTGAGCCCGCAGGACACTCTCGCACCGCTGG  
TGAAAGTGCAGGAGTGGCGGTGGCTTCGACGCCGCAACTACAAGGTGGAGCGCCGCTTCGCTACCGC  
ACCGGACCAGACCAAGATCCCGCTCTCAGTTGTGTGCCACAAAGACCTCGACATGAGCCAGCCGAGCCG  
TGCATGCTGTACGGGTACGGCAGCTACGGCCTTAGCATGGACCCGAGTTCAGTATTCAGCACCTGCCAT  
ACTGTGACCGCGCATGATCTTCGCCATAGCCACATCCGCGGCGGAGTGGAGCTGGGCCGTGCATGGTA  
CGAGATCGGCGCAAGTACCTCACGAAGCGCAACACCTTTTCCGACTTCATCGCGGAGCCGAATTCCTG  
GTGAACGCGAAATTGACGACGCCGTCGAGCTGGCCTGCGAGGGGCGTAGCGCCGGTGGCTGCTGATGG  
GCGCCGTGCTGAACATGCGACCCGATCTCTTCAAGGTGGCGCTCGCCGGGTACCGTTTCGTGGATGTCAT  
GACGACCATGTGCGACCCAGCATTCCCTTGACGACGGGCGAGTGGGAGGAGTGGGGCAACCCGAACGAG  
TACAAGTACTACGACTACATGCTGAGCTACAGCCCCATGGACAACGTCCGCGCGCAGGAGTACCCGAACA  
TCATGGTCCAGTGGCGCTGCACGACCCCCGCTGCGCTATTGGGAGCCGGCCAAGTGGGTGAGCAAGCT  
GCGTGAGTGAAGACGGACAACAACGAAATTCTGCTGAACATAGACATGGAGAGCGGGCACTTCTCCGCC  
AAGGATCGCTACAAGTTCTGGAAGGAGTGGCTATCCAGCAAGCGTTCGTGTGCAAGCACCTGAAGAGCA  
CCGTGCGCCTGCTGGTTCGCAGGTAA

>AF110372 1, 274 putative glycoprotein

GATCGAGGCAGAGAGGCAGAAGCTGAAGGAGCTGCAGGAGGAGCACGAGGGGAGCAGGAGGAGGCGCGC  
CAGCGTCGCGTTCGCGGAGGAGAAGGAGGCACAGAAGAGGGCCGAGAAGAAGCCGAGGAGGCCGAGGGCG  
AGCTTGCTGCGACGCGCCGGCAGAGGAAGGGGAGTTGGAGGAGCTGCAGCGCCACGCGGAGGAGGAGGA  
GAAGCAGCGCATCGAGATGGTGGCAAGCAGCGTGGAGGAGACCCAAAAGAAGCGCGAGGAGATC

>AF155593 1, 1305 hmgr

ATGCGCCGCTCTCTGCTGCTGCTGCTCCGCGCCAAAGGTGAGAGCTGGGCATCCATGTCCGATACAG  
AGATCATGAAGCAGGTGGAGAATAAGAAGATTGCATTTACGGCCTTGAGCAGGCTCTTGCACCCGACTA  
TGACCGCGCCATCGCCATTCGTGCTGAGATTGTGAAGAAAAGATATGTCCATCTCCAGCTGCCACACAT  
CCGCTGGAGAGGGTTCCCTACAAGAACTACGACTGGAGCAGTGTGTTGGGACAGAGCTGCGAGAACATCC  
TCGGCTACGTTCCGGTACCGGTAGGGTTGGCTGGTCCGCTGCTGTTGGATGGAAAAGGAAGTGGCACTGCC  
GATGGCGACGACGGAGGGTGGCTGCTGCGAGTGGCACCAGGCTGCTCGGCCATCAACCTGAGCGGC  
GGATGCCGGACAGCGGTGCTGAAGGAAGGCATGACGCGCGCCCCTGTAGTGGAGGTGAACTCCTTCGACG  
AGGCCATCACCGTGATCAAGTTCTGTGAGGAGCGGTTGACGTTCTAAGGGAGGCCTTCGAGTCGACGAC  
CCGCTTCGGGAAGTTGCTGAGCATCAAGTGTGCCATGGCGGGTCCGAGGTGCATCTGCGCTTCTCTGCC  
TTTACCGGAGATGCGATGGGCATGAATATGATCACGAAGGGCTGCGACAAGGCGCTGCAGGTGCTGCAGC  
AGCACATTCCCTCTGTGCGAGTGTGACCTTGTGAGCAACTTCTGCACTGACAAGAAACCGTCCGCACT  
GAACTGGGTGGAGGGACGCGGGAAGTCCGTGCTAGCGGAGGCCGTCATCAAGCGTGATGTGGTTCGAGAGT  
GTTCTCAAGTGCACGGTGGACAGTGTGTTGTGCTGAATGTAACAAAGAACTGCGCGGATCTGCGCTTG  
CCGGTTCATCGCGGCTTCAACGCACACGCTGCCAACATCGTGGCCGCGCTTACATCGCCACTGGCCA  
GGACCCCGCACAGGTAGTGGAGTCCGCAACCTGCATGACGACGGTTGACAAGGCTGGTGAGGATCTCGTG  
ATCAGCCTCATGATGCCGAGCATTGAGGTGCGCGCCGTAGGCGGTGGTACAGGTCTGTGCTGCGAGCGG  
CCATGCTGGAGCTGATGGGGTGGCGGGCTCTAACAAGGAGGACCCAGGTGCCCACTCCCGCCAGATCGC  
GCGTGTGCTTGTGGCGCAGTCAATTTGCGGTGAGCTGTCCCTCTTGTCCGGCCTTGCAGCTGGCCACTTA  
CTAAGCGCCCACATGAAGCTGAACCGCAAGCCTCCGACTCCGTAA

>AF199016 1, 1932 EF2-1

GAGAAGGGCACTGTGGCGATCGGCTCTGGCCTGCAGGCGTGGGCGTTCTCGCTGACCCGCTTTCGGAACA

TGTATGCGGCGAAGTTCGGCGTGGACGAGCTGAAGATGCGCGAGCGCCTGTGGGGCGACACTTCTTTGACGCGAAGAACAAGAAGTGGATCAAGCAGGAGACGAACCCGATGGCGAGCGGTGCGCCGCGGTTCTGCAGTTCTGCCTAGACCCCATCTACCAGATCTTCGACGCTGTGATGAACGAGAAGAAGGACAAGGTGGACAAGATGCTCAAGTCGCTGCACGTGACGCTGACGGCTGAGGAGCGCGAGCAGGTGCCGAAGAAGCTTCTGAA GACGGTGATGATGAAGTTCCTGCCGGCTGCTGAGACGCTGCTACAGATGATCGTGGCGCACCTGCCGTCG CCAAGAAGGCGCAGGCGTACCGTGGGAGATGCTGTACTCTGGCGAGGCGTCCCGGAGGACAAGTACT TCATGGGTATCAAGAACTGCGACCCCGCTGCGCCGCTCATGCTGTACATCAGCAAGATGGTGGCGACGGC CGACCGCGCCGCTTCTTCGCCTTTGGCCGCATCTTCTCCGTAAGGTGCGCAGCGGCCAGAAGGTGCGC ATCATGGGTAACAACACTACGTCTACGGCAAGAAGCAGGACCTGTACGAGGACAAGCCTGTGCAGCGCTCCG TGCTGATGATGGGCCGCTACCAGGAGGCCGTGGAGGACATGCCGTGCGGTAACGTGGTGGGCCTTGTGGG CGTGGACAAGTACATCGTGAAGTCCGCGACGATCACGGACGATGGCGAGAGCCCGCACCCGCTGCGCGAC ATGAAGTACTCTGTGTCGCCCGTCTGTGCGTGTGGCCGTGGAGGCGAAGAACCCTGCCGACCTGCCGAAGC TTGTGGAGGGCCTGAAGCGCCTTGCCAAGTCCGACCCGCTGGTGGTGTGCAGCATTGAGGAGTCTGGCGA GCACATTGTTGCCGGCGCTGGCGAGCTTACCTTGAGATTTGCCTGAAGGATCTCCAGGAGGACTTCATG AACGGCGCGCCGCTGAAGATCTCCGAGCCGGTGGTGTGCTTCCGCGAGACGGTGACGGATGTGTCGTGCG AGCAGTGCCTGTGGAAGTCTGCGAACAAGCACACCCTCTTCTGCGCGGTGCGCCGCTGACAGAGGA GCTGGCGCTGGCGATGGAGGAGGGCACCGCTGGTCCCAGGCGGATCCGAAGGTGCGCGCGGCTTCCCTT GCCGACAACACTACGAGTGGGACGTGCAGGAGGCCCGCAAGATCTGGTGCTACGGCCCGACAACCGCGGCC CGAACGTGGTGTGATGTGACGAAGGGTGTCCAGAACATGGCTGAGATGAAGGACTCCTTTGTTGCCGGC GTGGCAGTGGGGCACCCGCGAGGGTGTGCTGTGCGACGAGAACATGCGCGGCGTGCGCGTGAACGTGGAG GATGTGACGATGCACGCGGATGCCATTCACCGTGGTGGTGTCCAGATCATCCCAGCGCGCGCCGCTGT TCTACGCGTGCTGCCTGACGGCGTCCGCGCCCTGATGGAGCCGATGTTGTTGGTGGACATCCAGACCGT GGAGCACGCCATGGGCGGCATCTACGGTGTGCTGACCCGCGCCGTTGGCGTGATCATTGGCGAGGAGAAC CGCCCCGGCACGCCCATCTACAACGTGCGCGCTACCTGCCGGTTGCGGAGTCGTTCCGGCTTCACTGCCG ACCTGCGCGCTGGAACCTGGCGGCCAGGCCTTCCCGCAGTGTGTGTTCCGACCACTGGCAGGAGTACCCCGG TGACCCGCTGGAGCCGAAGTCGCTGGCCAACACGACGACGCTTGGCATCCGCACGCGCAAGGGCCTGAAG CCGGATATCCCCGGCCTGGACCAGTTCATGGATAAGTTGTAA

>AF199018 48, 869 RS4

ATGGCCAAGAAGCACCTCAAGCGCTTGTATGCGCCCAAGGACTGGATGCTGAGCAAGCTGACCGGCGTGT TCGCGCCGCGTCCGCGTCCGGTCCGCACAAGCTGCGCGAGTGCCTGCCGCTGCTGGTGATCATCCGCAA CCGGCTGAAGTACGCGCTGAACGCGCGGAGGGTGAGATGATCCTGCGCCAGGGTCTGGTGCACGTGGAC AACCAACCCGCGCCGCGACGGCAAGTATCCCGCCGTTTTCATGGACGTGGTTCGAGATCCCGAAGACGGGCG ACCGCTTCCGCTGATGTACGACGTCAAGGGCCGCTTCCGCTTGGTGAACCTGTCCGAGGCGGAGGCCGA GATCAAGCTGATGAAGTTGTGAACCTGTACACGGCCACCGGCCGCTGCCGGTCCGCTGTGACGCACGAC GGCCACCGCATCCGCTACCCGACCCGCACACCTCCATTGGTGACACCATCGTGTACAACGTCAAGGAGA AGAAGTGGTGGACCTGATCAAGAACCGCCAGGGCAAGGCCGTGATCGTGACCGGTGGCGCCAACCGCGG CCGCATCGGCGAGATCGTGAAGGTGGAGTGCCACCCCGGTGCGTTCAACATTGCGCACCTGAAGGACGCG TCCGGCGCCGAGTTCGCCACCCGCGCCGCAACATCTTCTGATCGGCAAGGACCTGAACAACCTGCAGG TAACGGTGCCGAAGCAGCAGGGCCTGCGCATGAACGTGATCCAGGAGCGCGAGGAGCGCCTGATCGCGGG GGAGGCCCGCAAGAACGCGCCGGCTCGTGGTGGCCGACGGGCCCGCAAGTGA

>AF199019 1, 603 alpha tubulin

CTGACGGAGTTCAGACGAACCTTGTGCCGTACCCGCGCATCCACTTCGTGCTGACAAGCTACGCTCCGG TGGTGTCTGCCGAGAAGGCGTACCACGAGCAGCTGTCCGTGCGGGACATCACGAACTCGGTGTTTGAGCC TGCTGGCATGCTGACGAAGTGGGATCCTCGCCACGGCAAGTACATGTGCTGCTGCCTCATGTACCGCGGT GATGTGCTGCCGAAGGATGTCAACGCCGCGATTGCGACGATCAAGACGAAGCGCACAAATTCAGTTCGTGG

ACTGGTGCCCGACCGGCTTCAAGTGCGGCATCAACTACCAGCCGCGACCGTTGTGCCCGCGGTGACCT  
CGCGAAGGTGCAGCGCGCCGTGTGCATGATTGCCAACTCGACCGCGATCGCTGAGGTGTTTGCCCGCATC  
GACCACAAGTTTCGACCTGATGTACAGCAAGCGCGGTTTTGTGCACTGGTACGTGGGTGAGGGCATGGAGG  
AGGGCGAGTTCTCCGAGGCGCGGAGGATCTCGCTGCGCTGGAGAAGGACTACGAGGAGGTTGGCGCCGA  
GTCCGCGGACGACATGGGCGAGGAGACGTGCGAGGAGTACTAA

>AF202062 1, 225 hexokinase

GATTTGGGAGGAACATAATTTCCGCGTGTGCGTGTGAGCCTGCGCGGCGCAAGGTGGACGACCGCACCG  
ACTCGAAGTTTCGTCATCCCGAAGAGTGCCCTGGTTGGCGATGCCACCGACCTGTTGACTTCATTGCGCA  
GAGCGTGAAGAAGATGATGTCGGGAAAACGCCCCGACGACCTGGAGAAGCCGTGCCGCTGGGATTACAG  
TTCTCCTTCCCCTTG

>AF205930 1, 1352 N-acetylglucosamine-1-phosphate transferase

AACGCGGCCTTCGCGGTGCTGTGCACGCGCCGGTGTGGGGCTCATTCTGCTGGGCAGCATCGTGGCAT  
ATGTTGGTACCATGCGCTACATCCCAAATGTGGCGAGGACGCTCTTGAGCGTAACATCTTCGGCATCGA  
CATTAAACAAGAACACGGAGGAGCAGCGCCAGAAGTTTGTGTGAAGCGCCGGGCGGTGACACAGAGGAA  
AAGGAATTCCAGAAGCAGGCGATCCAGAGTCTCTCGGCATCCTCGTAGGCGCCGTGTACCTTTCTGTGG  
TGATGGTGCTCACCGTGTGTCTCCGTTTTCTCGGCACCGCTGGTGAAGGGTTAGACAACCTTACGCATC  
ACTTCCGGGTCCCTTGATGACCATCACCTCATGCTTCTCTTGGGGTTACGGATGACGTGCTGGATGTG  
AAATGGCGCCACAAGATCATCTCACAACGCTCGGCTCGCTGCCTCTCATCATGACGTACGACGGAAGTC  
TATCCGTGCTGATGCCGTGCGTGTTCGGTTCGCTTCCGTCTGCCACCATGAACGTAACGAAGACGTGGCT  
TCTTGGCCTCGCTGCCGACAAGGCGAACCGACAACCACCTTTTCGCGTACGGCTCCCTCGACATGGTTC  
TCCTACGTTGTGAGTACCGTTCCCTACGTCAAGGTCTCCGAAAGTGGCACGGTGTGATCTACCTCGGTC  
CCATCTACCTCGTTTACTTGTCCATGCTGTGCATCTTCTGCACCAACAGCATCAACATTCTCGCCGGCGT  
CAATGGTGTGGAGGTGGGGCAGAGCATTGTGATCGCAGTCGCGTCTGTTGTGTACAACCTATTCCAGATG  
CGCCTCGAAAGACAGGCGACACCGGCCTTGAGCAGCGTGCAGCCTGTGGCGGCAGATGCACGCGACATGC  
GGAGCGATCATCGACTGCGCGGCTGCTCTTGTGGGGCCTTTTCATCGGTGTGAGCCTGGCCCTCTGGCG  
CTACAACCGCTACCCCGCCCGCTTTCGTGGGAGACAGCTATACTACTTTGCCGGCACCGTGTGGCG  
GTGTCCAGCATCACCGCGTGTACAGCAAGACACTGCTGCTCTTTTTTTCGCGCCGAGGTGTTCAATTTTA  
TCATATCACTGCCGAGCTCTTCAACATTGTGCCGTGCCCGCGCCACCGCGTCCAACGTGGAACCCGCG  
GACGAACCTGTTGTCAAACAGCCACAACATAACCATCCTCAACGTTGTCTTACCTCTTCGGCGATATG  
CACGAGGAGAAGCTGACGTGGGCGATCCTCAAGTGTGAGGTGATCGCCTGTGTTTTGGGGTTCGTGCTGC  
GGTACGTGTTGAGCTCCTTTCT

>AF208490 1, 1243 selenophosphate synthetase

TTGCTGTGCGAAGCGAGGAGAAGCCGCAAGCACACCCACCCCTTCATGTGCGACAAGCGACCGCAGTCC  
TCCGCGAGGAGAGTGAACGGGGCGGTGATCTCAAACCGCCGTTTTCGACCCCGTCTCACTGGGCCTCC  
CTGCTGAGTTCCAGCTCACCGACTACACACGCCTGAAGGGGTGCAGCTGTAAACTGCCACAGCCAAAGCT  
ACTAGCCCTGCTGCAGGAACTCTCGGCAACGCCTGGGCGAAGGACGTGGCATGGACTGCAGCATTGTG  
CCGCTGCACCACACCAACAGCAAAGGTGAGGCTCTGTTCTCGTCTCCACGACGGACTTCTTCTTCCCA  
GTGTGTCGGACCCGTTCTGCAAGGTCAAATCGGGGCTGCAAACGTCTTGTCCGACCTGTATAGCATGGG  
CATCCCGGATTGTGATACAATGCTGATGTTGCTCGCGGCCAGCACCGAGATGGACGAGCATGAACGCCTG  
ATTACGACGCGGAAATCATGAAAGGCTTTGAGAGCGGGCGCGGTTGGCGACGACAACGGTGACAGGAG  
GGCAGACGGTCATGAACCCGTGGCCGCTGATTGGCGGGGTGGCCATGGCCGTCGTGTCCGAGGCGGAAAT  
GGTGCGGCCAACAGGGCTCTTGTGCGCCGGGACATATTGGTGTGACGAAGCCGCTGGGGTGCCAGGTT  
GCCGTGAATCTCAAGCAGTGGCTGCTGCGGCCCTCGCCGCTGTACGAGGAGGCCATTGCAGGGCACATCT  
CCCCCGAAGAGATCGAGGAACTGTACAATATGGCCACGGATAGCATGCGACGTCTGAACCGGAAGGGGC  
TCGGCTGATGCGGAAGCACGGCGCGCACGGGGCCACCGACGTGACCGGCTTTGGCATTCTGGGGCACCGC

AACAAC TTTGGGGCAGCGCAAGCCGTCGGTGATGCGCCGCGCTCGCTGTGTCTCGTACTGGAGCGGCTGC  
CGATGTTCAAGACCGCTGTGGCCGCCTCGAAGCAGATGAATGACAAGTACCGCCTTCTCGAAGGGTACTC  
GGCCGAAACAAGCGGGGGCTGCTGGTGGCGTTCCCGAGCACCACCGCAGCGGGCGGCTTCTGCGCGGAG  
CTCACGGCGGTGATGGCGGGTGTCCGTCGTGGATTGTGCGGCATGTGGAGGATCGCGCCACCAACGCCG  
TCGATGGTGT TTTACGCCCGCTAAAGGACGGGTATGAAATTGTGGAGGTGTGA

>AF224339 344, 1318 casein kinase 1 isoform 1

ATGTCAAGCGCACTAGAGAACTGCCTGGTGCAGGGCGGCCGCTTCCGCCTTGGCCCGCATAGCGGGCG  
GCTCCTTCGGCGAGATCTTCTGGGAGTCAACACCCAAACCGGTGAAGTGGTGGCCATGAAGGTGGAGCG  
CACAAGGACGGCCCACCCGACGCTGTTGTGAGAATCGCGTACTACACCCTTCTGAGCCAAGGCCGTGGG  
GCGGCTTACATGCCAACCATCTTCGGATACTCCTCCGAGGGCGAGTTCAACGTGATGGTGTATGGAGCTGA  
TGGGCCTGTCACTGGAAGATCTGCATGAAAAGTGGCGCAACCGCTTTTTCGCTCAAGACGACGCTGATGCT  
GGCGGACCAGATTCTGTGGCTCATCGAGCTTGTGCACTCTCACAGCGTTCTGCACCGCGACATCAAGCCC  
GACAATTTCTCATGGGCACCGGAAAGAAGGGCCACCACGTGTACATCATCGACTTTGGGCTGGCGAAGA  
AGTATCGTGACCCCCGACGACGCCCACATCCCATACAAGGAGGGCAAGAGCCTGACAGGCACGGCCCCG  
CTACTGTAGTATCAACACGCACCTCGGCGCCGAGCAGAGTGCCTGACGACATGGAGGGCATCGCCTAC  
CTCCTCATCTACTTCTTCGTGGATCGCTGCCATGGCAGGGCTTGGAGGGCGTCAACGAAGGAACGAAAGT  
ACAGCTTAATCGCGCACGCGAAGATGAGCACCTCCGTCGAGACGCTCTGCAAAGGGCTGCCCATCGAGCT  
CGCATCATTCTGAATTACTCGCGTGCCTGCGCTTCGAGGACCGCCCTGACTACGGCTATCTCCGTTCT  
ATGTTTTCGCCGACTCTTCATGCGAGAGGGCTACCAGGAAGACTATGTCTATGATTGGACGGTGCGCAGCA  
TGCATGAGACGCTCACAGCGCGCAGCGCAAGAATGCAGCGAAGCGCGGAAAGAAACAGAAGTAG

>AF224340 57, 1118 casein kinase 1 isoform 2

ATGAACGTGGAAC TGC GCGT CCGCAACCGCTACCGGATCGGT CAGAAGATCGGCTCCGGCTCCTTCGGTG  
AGATCTTCCGCGCACGAACATTCAGACGGGAGACCCTGTCCCATCAAGCTCGAGCAGGTGAAGACCGG  
CCACCCGACGCTCACGTATGAGTCGCGCTTCTATCGCATCCTCGGCAGCGGGCGGGCGCCGTCGGCATC  
CCCATGATGTTCTATCACGGCGTCGAGGGCGAGTTCAACGTGATGGTGAATTGAGCTGCTCGGCCCTCGC  
TGGAAGACCTCTTTTCTTTTGGGTCGCCGCTCTCGCTGAAGACGACGCTGATGCTGGCGGACCAGAT  
GATCAGCCGCATCGAGTTTGTGCATAGCAAGAGCGTTCTGCACCGCGACATCAAGCCGACAATTTCTC  
ATGGGCACCGGAAAGAAGGGCCACCACGTGTACATCATCGACTTTGGGCTGGCGAAGAAGTATCGTGACC  
CCCGCACGCACGCCACATCCCATACAAGGAGGGCAAGAGCCTGACAGGCACGGCCCCGCTACTGTAGTAT  
CAACACGCACATGGGCGTGAGCAGGGCCGCCGTGACGACATGGAGGGCATCGGCTACATCCTCATGTAC  
TTCCTTCGTGGATCGCTGCCATGGCAGGGCTTGAAGGCGCACACGAAGCAGGAGAAGTACAACCGCATTT  
CCGAGCGAAAGCAGACGACACCGGTGGAGCTGCTGTGCAAGGGCTTCCCAGCGAGTTCGCCGCTACAT  
GAACTACGTGCGTGCGCTGCGCTTCGAGGACAAGCCGACTACTCGTACCTGAAGCGCATGTTCCGCGAC  
CTATTTGTGCGCGAGGGATACCACGTGACTACGTCTTCGACTGGACGCTGAAGCGCATTTCATGAGAGTC  
TGCAGGAGCAGCAGTCTTCCCGGGCGG CAGCAACGGTGGCGGTGCTGCGGGCAATGGCTCCCGGTGAA  
CCAAAGCCCGGCACAGGGCGGCAACGGTGGTGC CCAAACAGCGCTAACAACCAGGAATCGGGTGCGCCA  
GAGCAGCAGTAG

>AF229369 1, 328 20S proteasome alpha 5 subunit

TGCTGTGGAGGCCATCAAAC TGGTAGTACCAGCCTCGGAATCCGCACGCCTAAGGGCGTCGTTCTTGCC  
GCGGAGAAACCGGTGCCATCGACCTTGGTTCGTTCCGTCCAGCATGAGTAAGATTATGGAGATCGACAGCC  
ACATTGCGGCTGTCATGAGCGGCATGGTTGCAGATGCGCGCATCCTTGTGAGCAGCCCGGTGGAGTC  
GCAGAACCACCGCTTACCTACAACGAGCCCATGTCTGTGGAGTCCTGCACGCTAGCGACGTGCGACCTG  
TCGATCCAGTTTTGGTGAGAGCGGTGGAAGCGCAAGCTCATGTGCGGC

>AF234766 2222, 3526 LPG1

ATGGCGCCTCGTTCGCTGGCATCAAAC TCCGGCGCATGGCGTCATTTGTGCGTATTGGTCTTTACACAC

TTCTCTTCTCATGGGCTACATTGTCCCGCTTATCATTCTATAATCGCTCGGGCACAGAGACCTTCGA  
AGATACCCCTCGTCCAGGTGAGAGGTTTATCAGTGACGAGAATTTTTTCCACTGCATCGCGGAGCGTCTC  
TCATATAAGGACCAACACCCAGCACGAATCCCGTACGTGCTAATACCGGTGACGATGGATTACCAGGACA  
TCAAGCAACTCTTCTGCAATATTACAGTCCCCATGACGTACATCATGTTTATTAACAATGGCATGTTCCG  
CCCCTGCGCTCGCTTCTCGACCGTCTCGCCGTGGAGCTGAGGGACTACGTGACCCAGAATCTCTTTATC  
ATTACACCCAGAGAACATCGGCTACGCGTCTGCCGTGAACGAGGGTTTGCAGCAGCTCTCAACTTCT  
CCGTTGCCAGGTGCCGTGGATCTTCATACCAATGCCGACGTGCGCTTTGCGCCGGGGCTCATGGACGA  
GTTTGTCTCGCAGGCACACATAAGGACACAAGGCCAGCTCGAGCGCATTGCGCCCTCGACGAAGAGATC  
GTTGCCGAAATCAAGACGCTGAAAAACGTGCCAGACCCGCGGTTTGTCTTCCGAGCAGCCGGCACCCCA  
TCGTACGGCATCCTCGCTGCCGTATCGTATTCCGACCATGCCCCAGAGCAGATGAAGAAGCAGTTCGC  
CGACGCATACGGCATCTTTTTCACAGACCACAAGGAGTTCATGGCTACATTTGCGCTGTCCCGCTCGCC  
ATTGCGACCTTAGGGTTCTTTCGACGAGAATTCTACCCCGCCTACGGCGAAGATCACGACTACATGTGGC  
GCATGAATGCTCTGGGCTACCGAAAGTACTTCTCCGAGCGGGGAAAGTATGTGCACTTCAAAACGCGAA  
CCTCAACGTCCGTGGGTGCCCAAGAACCGGGGCGTCTTCAAGGACACTGCCTACTTCGTCCAGAACGTC  
AAGTTTTGGCGTATGAACAATGAGCTGTTTCCGCTGCAATATCGCCATGCGAAGTGGTTCCTGATGATG  
TCACCATCTATCGAGGTGTCAGACGCGGCCACTACCGTTTAAACGGAACCATTCTGTGACATGTGGGT  
ACTCGACGCTGAAAGGCAAAGTCCATCTGGCAAATCGGCGAAAGCATGCGCTGTCACCGGACTACAAG  
CCATACAGCACAAAGCTACTGGACTTTGCTGTTGATCCTAGCTAA

>AF242436 1, 1440 gnd

ATGTGCAACGACCTCGGCATTATCGGTCTCGGCGTCATGGGCGGAATCTCGCCCTGAACATCGCCGAGA  
AGGGATTTAAAGTTGCCGTCTTCAACCGCACCTACGCGAAGACGACGTGTTTTCTCAAGGAGCATGAGAG  
CGAGAAATTTGCCGCCAACCTGAATGGATACGGGACCATGAAGGAGTTTCGCTGCGTCCCTCAAGAAGCCG  
CGCCGCGGTTTATTCTCGTCCAGGCCGCGCCGCTACTGACTCTACAATCGAGCAGCTCAAGGAAGTGT  
TCGAGAACGGCGACATCATAATCGACACTGGTAATGCGAACTTCAAGGACCAGGACAAGCGCGGGCTCA  
GTTGGAGAGCCAGGGTCTCCGTTCCCTCGGCATGGGCATCTCCGGTGGTGAGGAGGGTGCAGCAAGGGG  
CCGGCCTTCTTCCCGGTGGCACACCAAGCGTGTGGGAGGAGGTGCGCCGATCGTGAGGCGGGTGGCG  
CCAAGGCTGAGGACGGACGCCCGTGCCTGACTTTCAACGGCAAGGGCGGGCTGGCTCCTGCGTGAAGAT  
GTATCACAACGCTGGGAGTACGCCGTGCTGCAGATCTGGGGTGGAGCGTACAGCGCCCTGCTTGCCTTC  
GGCTTCGACAACGATCAGATCGCCGACGTGTTTCGAGTCTGGAAGGCGGATGGCTTCCCTTAAATCCTACA  
TGCTCGACATCTCCGTTGCCGTTGCCGAGCGAGGGAGGCAACAGGCAACTATTTGTGAGAGAAGGTCAA  
GGACCGCATCGGCTCCAAGGGCACCGGCCTCTGGTCTGCCAGGAGGCTCTGGAGATTGGTGTGCCAGCG  
CCCTCGCTCAACATGGCCGTATCTCACGCCAGATGACCATGTACAAAGGGGAGCGCATCGCCAACTGCA  
AGGCGTTTCCCTAACTTCCCTCGTGGCCCTTCTGAGGAAGCCACGGACAAGTCCCCGAACTCCCCGAAGC  
GAAGAAGCTGTACCACGCCGTGAGCCTTTGTATCATCGCGAGCTACGCGCAGATGTTCCAGTGCTTGGCG  
GAGCTGGACAAGGTGTATGGATTCCGGCCTGAACCTGCCGCCACGATCGCCACCTTCCGCGCCGGCTGCA  
TTCTGCAGGGCTACCTGCTAGGGCCTATGACCAAGGCCTTCGAGGAGAACCCGAACCTGCCAACTGAT  
GGACGCCTTACCAAGGAGATAGCGCGGGCCTTGATGACTGCCGTGAGATTCTCGCCAAGCTCACAGAG  
AACACGGCAGTGTCACTGCCGTCATGATGGCCTCACTGTCTACATCAACGCCATGTACACGGAGACTC  
TTCCGTACGGACAGCTGGTGTGCTTGCAGCGGACGTCTTTGGCCGCCACGGCTACGAGCGCACGGACAA  
GGACGGTCTGTGAGTCTGAAATGGCCCGCACTGCAGTAG

>AF244919 493, 2388 BT1

ATGCCAGGTGCTTACCGCGTGCCGTCCGCGCCGGAATCGCCGCCGCGCAGGGGGCCAAGTACGTTTCATC  
CTGTTTCCGCTCACGTGCTGCGCGTGCAGCGTTTCCCTGGCTACATCCCGGTCTTTCAGCATTGTGATCAG  
GTCATTCCACCCCAAAGTTGTGCTCGCCATTTGCATACAGCGCTTATTTCGAGAAGGGCCTCGCAGATGGG  
CTGATGCGACTGTGATCCAACCGATGCTGACGGGACGCTACGGACTACCGGGGCCATGTACCAGCGCC

TGTCCACCCTCTACACCCTGGGCTGGGCCCTCAACGCATTCATCACAGTGATGGCGGACACGTTTGGCGT  
GTTCCGGGTACACGAAACGGTGGTACTGCGTGATGTCGGCGGTGGGCGGCAGTGTGTTTCGCGCTGCTGTAC  
GGGCTGCTGCCGGCGAAGGAGTCGAGCGCGAAGCCTGCTGCGGCCCTCATGTTCTGACGGCACTGTTCA  
TGAGCAATATCGACGTCTTCGCTGTTGCCTTGTACAGCGAGCAGATCCGCCGGCGTCCAGCTGCCGGGCG  
AGCGCTGGTGAGCTGGATGTGGGGCACGGCGCTCATCGGTATTATGATTTCCAGCGTCATTCTGGGTCT  
CTCTCTGACAATGGACTGGCGCACTTTGGTGTGTACATCACAGCCGCCATCCTGCTGCTGTCGGGTCTAC  
TGTTCTGTTCAACCTCTTCGAGGAGCGCCGCAACCGCGCGGCACGCCTGGAGGACGCCATGATCGAGTT  
CCTTCAGAAAACCAAGAGCGCAAGCAGCGAGAGCACAGCCGGCTCCCCGCCGTCGCCACATAAGCTGGAT  
GGGCATCTCACCATTGATAACCGCGTGGAGGAGGAGGACGACAACGTCGACGAGCAGGAGGCAGCCGCGA  
TGGATGCGCAGGGCTTTGTGCGGCCGCGCATGGACACGTACCTATGCGGTGCCGTGGAGATGAACCGGGA  
CGTCATTCTGCGAAACTGGCGGATGGCGTTATTCTGCCTGATTCTCACGCTCGGCGTGATCGTAATTCA  
CTCGTGAGCATTCTTGGCACGTGGTGGACATCATGTATGTCTGCATCGTCTTGGCGGCGGTGTTGTGCG  
TCAGCTCCTTCTTACGTTGCCGCTGGCCATTGCCAAGGCGTTGTGTTTATGTAATTTCAACGCAATCCT  
CTACCTGAGCCTGCCCGCGTGCTGAATACTTTCTACGTCGCGAAGCCGTCATGCCTCCCCGATGGACCG  
CACTTCTCGTACACGTTCTACAACGCCATGAATGGCTTTCTGGGCAACATCGCGGGCATCGGTGGTACCA  
TCGTGTTTACGCATCTGTTCCCTCACCACAGCTATCGTTTTGTGATGGGCCTCTCCGCTGTTCTGCTGCC  
GGCAGCCTCTATGTTTGACGTCCTCATCTTGAAGCGCTGGAACCTGGCCATCGGCATCCCGGACCACGCC  
ATGTACATTTTTGGGGACACCATCATCTACGAAGTGTGCAATATGCTCCTGAACATGCCCATGATGATGC  
TCATGTGCCGATATCGCGCCGCGCGGGTCCGAGTCGATGGTGTGTTGCGCTACTCGCGAGCATTTACCACCT  
CGGCACCTCGACCTCGTCAGCGATAGGCTACCTGCTGATGGAAACGATTTGGCCGGTGTACGCAGGGC  
CAGTGTGACTACAGCAACGCGCTGTGGTTGGTGATCACTGGGCACATTGTTACACCCGTTTTCTCTTAC  
CATTGGCTTACATCCTCCTCCCATCAGCGCGCATCAGTGACCACATTGACCACACGGGTCCGGAAGGTGAT  
GGAGGTCGCACTCCCGGAGACGCGCACTGAGGAGGCAGAGGAGCCGATCGCTATGACGACGAGGCGGGAC  
AGCTAG

>AF305956 1, 1266 NMT

ATGTCTCGCAATCCATCGAACTCCGACGCTGCGCATGCGTTCTGGAGCACACAGCCCGTACCGCAGACGG  
AAGATGAGACGGAGAAAATTGTGTTTCGCTGGTCCGATGGACGAGCCAAAGACGGTAGCCGATATTCCTGA  
GGAGCCGTACCCGATCGCCAGCACATTTGAGTGGTGGACGCCGAACATGGAGGCGGCCGACGACATTCAC  
GCAATTTACGAGCTTCTTCGGGATAACTACGTGCAAGACGACGACAGCATGTTTCGTTTTCAACTACTCCG  
AGGAGTTTTCTTACGTGGGCACTATGCCACCGAACTACATCCCGACTGGCACGTTGCAGTTCGCCGAAA  
GGCGGATAAGAAGCTGCTGGCCTTCAATGCCGGCGTTCCTGTGACGTTGCGCATGGGCACTCCCAAGTAC  
ATGAAGGTGAAAGCACAGGAAAAGGGCGAAGGGGAGGAGGCGGCAAGTATGATGAACCCCGTCACATCT  
GCGAAATCAACTTTCTCTGTGTCCACAAGCAACTCCGGGAGAAGCGGCTTGCCCCGATTTTGATCAAAGA  
GGCGACGCGCCGCGTGAACCGCACCAACGTGTGGCAGGCGGTGTACACGGCTGGGGTGTGCTACCCACT  
CCGTATGCATCAGGGCAGTACTTCCACCGCAGCCTGAACCCCGAGAAGCTTGTGGAGATCCGCTTACGG  
GCATTCCAGCACAGTACCAAAAAGTTTTCAGAACCCAATGGCGATGCTGAAGCGCAACTACCAGCTGCCAAG  
CGCGCCGAAGAACTCTGGTCTTCTGTAATGAAGCCGTCTGACGTTCCGCAGGTGCGGCGGATTCTCATG  
AACTACCTGGACAGCTTCGATGTAGTCCCCTCTTTAGCGATGCCGAGATCAGCCACTACCTCCTTCCAC  
GCGACGGTGTGGTCTTACCTACGTGGTGGAAAACGTCAAGAAGGTGACCGACTTCTTTTCTTCTATCG  
AATTCGGTTCGACTGTGATTGGGAACAGCAATTACAACCTTCTGAACGCGACTTACGTTCACTACTATGCC  
GCGACGAGTATACTTTGCATCAACTATTCTCGACCTTTTGTATCGTGGCGCATTACGCGGCTTCGACG  
TGTGCAATATGGTAGAGATCCTCGACAACCGGTCTTTGTTGAGCAGCTCAAGTTTGGCCCCGGCGACGG  
TCATCTTCGATATTACTTCTACAACCTGGGCGTATCCAAAGATCAAGCCTTCTCAGGTTGCCCTGGTGATG  
CTGTAG

>AF312583 1, 627 FeSODB2



ATGCCGTTTCGCTGTTTCAGCCGCTGCCGTACCCCCACGACGCGCTCGCGTGAAGGGCATGTCGAAGGAGC  
AGGTCACCTTCCACCACGAGAAGCATCATAAGGGGTACGCCGTGAAGCTGACCGCTGCCGCGGAGTCGAA  
CTCGGCTCTTTCGCTCGAAGTCGCTGGTGGACATCATCAAGTCTGAGAAGGGCCCCGCCTTCAACTGTGCG  
GCGCAGATTTACAACCACGACTTCTTCTGGCGCTGCCTCTCGCCACGCGGCGGGTCAAAAACCGCACGGAG  
AGATCGCGAGCGGATCATCGACAGTTTTCGGCAGCTTCTCGAATTTCAAGAAGGAATTCACGGATGCGGC  
CAACGGCCACTTTGGCTCGGGCTGGGCGTGGCTCGTGAAGGACAAGTCGAGTGGCAAGCTGAAGGTGTTT  
CAAACGCACGACGCGGGCTGCCCGCTCACGGAGCCCGACCTCGTACCGATCTTGGCGTGTGATGTATGGG  
AGCACGCGTACTATATCGACTACAGGAACGACCGCGCTCCTACGTGAGCGCGTTTTGGAACATGGTGAA  
TTGGTGCACGCCAACCCTGCTACAGGGCCGCTGGTGGCTCCCACTACGTCAACAGTGATCTGTAA

>AF312586 1, 588 FeSODB1

ATGCCGTTTCGCTGTTTCAGCCGCTGCCGTACCCCCACGACGCGCTCGCGTGAAGGGCATGTCGAAGGAGC  
AGGTCACCTTCCACCACGAGAAGCATCATAAGGGGTACGCCGTGAAGCTGACCGCTGCCGCGGAGTCGAA  
CTCGGCTCTTTCGCTCGAAGTCGCTGGTGGACATCATCAAGTCTGAGAAGGGCCCCGCCTTCAACTGTGCG  
GCGCAGATTTACAACCACGACTTCTTCTGGCGCTGCCTCTCGCCATGCGGCGGTGGCGAGCCATCGGGCA  
ATTTGGCCAGTGCATCATCGACAGTTTTCGGCAGCTTCTCGAATTTCAAGGAGGAATTCACGGCTGCGGC  
CAACGGCCACTTTGGCTCGGGCTGGGCGTGGCTCGTGAAGGACAAGTCGAGTGGCAAGCTGAAGGTGTTT  
CAAACGCACGACGCGGGCTGCCCGCTCACGGAGCCCGACCTCGTACCGATCTTGGCGTGTGATGTATGGG  
AGCACGCGTACTATATCGACTACAAGAACGACCGCGCTCCTACGTGAGCGCGTTTTGGAACATGGTGGA  
CTGGGATTTTCGCTCTAGCCAGCTTTAA

>AF312588 1, 693 FeSODA

ATGTTCCGCCGCTCTCGATGAAAGCCGCCACGGCCACCGCTCCCGTCCGGTTTTTCGTTCTGTGCTACC  
ATACCCCTTCTCATCTTCGGTACCCGGCCGAGCTGCCGACGCTCGGCTTCAACTACAAGGACGGCATCCA  
GCCCCTCATGAGCTCCCGTCAGTTGGAGCTGCACTACAAGAAGCACACAGCGGTACGTGGACAAGTTG  
AACACGCTCGGCAAGGGCTGCGAGGGGAAGACGATTGAGGAGATCATCTTGGCGACCAGCGGCAGCACTG  
AGAGCAAGGTCAATGTTCAACCAGCCGCTCAGCACTTCAACCATTCTTCTTCTGGAAGTGCCTGTGCGC  
TGGTGGCAAGCCGATGCCGAAGACGCTCGAGAATGCCATCGCGAAGCAGTTCCGGAAGCGTCGACGACTTC  
ACGGTTTTCTTCCAGCAGGCCGGCGTGAACAACCTTTGGCTCTGGCTGGACGTGGCTCTGCGTCGATCCCC  
GGACGAAGGAGCTTCGCATCGACAACACGAGCAACGCGGGCTGCCCGCTGACCTCTGGCTTGCGCCCAT  
CTTACCGCTGATGTGTGGGAGCAGCCTACTACAAAGACTTTGAGAACCGCCGCGGACTACCTGAAA  
GAGCTCTGGCAGATCGTGCAGTGGGAGTTTGTCTGCCAAATGTATGAAAAGGCCACAAAGTAA

>AF336276 1, 336 H2B

ATGGCCTCTTCTCGCTCTGCTTCCCGCAAGGCTTCCAACCCGCACAAGTCGCACCGCAAGCCGAAGCGCT  
CGTGGAAAGTGTACGTGGGCCGCTCGCTGAAGGCGATCAACGCCAGATGTCGATGTCGCACCGCACGAT  
GAAGATCGTGAACCTCGTACGTGAACGACGTGATGGAGCGCATCTGCACCGAGGCCGCGTTCGATTGTTCCG  
GCGAACAAGAAGCGCACGTTGGGTGCGCGGAGGTGCAGACGGCGGTGCGCATTGTGCTGCCGCGGAGC  
TCGCGAAGCACGCCATGGCTGAGGGCACGAAGGCCGTGTCGAGCGCGTCCGCTTGA

>AF350492 782, 1807 lipophosphoglycan biosynthetic protein

ATGAACCACACTCGCGCTGTCATGGAGGCGATCCTCGCCGTATCACGTATAGCTTCTGCAGCGTGAGCA  
TGATTCTCGTGAACAAGCTAATCATGAACACGTACGACATGAACTTCCCATTCCGGAATCCTGGTGTGCA  
GACTGGTGGTGCAGTACTGATTGTGGCGCTGGCGAAGGCAGCACGCTTCGTTGAGTACCCGGCCTTTTCA  
TTCGACGTGGCGAAAAAGTGGCTTCTTCTTACTCTGCTCTTCGTGGCAATGCTATTACATCCATGAAGA  
GCTTGGCCACGATGTCGTCGCGGCTCAGACGATTCTCAAGAATCTGGCCGTTATCTTGATTGCACTCGG  
CGACAAATTCCTCTACGGCAAGGCGCAAACCCCGATGGTCTACTTTTTCGTTTGGCTTGTATCCTCGGC  
AGCTTTCTTGGCGCCAAGGGCGATAAGTGGGTAACAGCGTGGGGTCTCATCTGGACGCTTCTTAACATTG  
TCTCCACCGTCTCGTACAGCTGTACATGAAGGCTGTACTGGGCTCTGTGAGTAACTCGATCGGCCGTTA

CGTCTCTGCTTTCTACAACAACCTGCTGTCCCTACCCTTTTTCTAATAATGGGTGTCGGGGAGATCATG  
CCGTTCTCGGCCCAATCGGTGAGACAACCACGCTCGGTAAGCTGGTGTGACGTTCTCGGTGCTGGTGA  
GCTCCGTGATGACGTTCTGTCTTTTGGTGCATGTCTATAACCTCGCCCACCACAATGAGCGTCGTGGG  
CTCACTGAACAAGATAACCCCTCACTTTCCTGGGCATGCTGGCGTTCCACCAGTTCACCACCGCAACGGGT  
TATCTGGGTATCATGGTCGCGCTATCCGCAGGATTCCTATACACGCACCTCAACATCAGGGCGAACC  
CCAAGGCTTCTTCCGATTTGGAGCACCAGATGCAGCAGACCGGCAAGACGACAACGGAGTCGATCGTACT  
GGTGCACACGGACGAGAACAGCAGTGACAACCTCAAATCTGAGTAG

>AF363975 1, 939 p36 LACK protein

ATGAACTACGAGGGTACCTGAAGGGCCACCAGCGGATGGGTACCTCCCTGGCCTGCCCAGCAGGCGG  
GGTTCGTACATCAAGGTGGTGTGACGTCGCGGACGGCACAGCCATCTCGTGGAAGGCCAACCCGACCG  
CCACAGCGTGACAGCGACTACGGTCTGCCGAGCCACCAGCTGGAGGGCCACACCGGCTTCGTGTCTGTC  
GTGTGCTGCGCCACGCCACCGACTACGCGCTGACCGCGTCTGGGACCGCTCCATCCGCATGTGGGACC  
TGCGCAATGGTCAGTGCCAGCGCAAGTTCCTGAAGCACACCAAGGACGTGCTCGCCGTCGCTTCTCGCC  
GGACGACCGCCTGATCGTGTCCGCGGGCCGCGACAACGTGATCCGCGTGTGGAACGTGGCCGGCGAGTGC  
ATGCACGAGTTCCTGCGGACAGCCACGAGGACTGGGTGAGCAGCATCTGCTTCTCGCCGTCGCTGGAGC  
ATCCGATCGTGGTGTCCGGCAGCTGGGACAACACCATCAAGGTATGGAATGTGAACGGGGGCAAGTGTGA  
GCGCACGCTCAAGGGCCACAGCAACTACGTGTCCACGGTGACCGTGTGCGCCAGACGGGTGCGTGTGCGCG  
TCCGGCGGCAAGGACGGCGCGGCGCTGCTGTGGGACCTGAGCACCGGCGAGCAGCTGTTCAAGATCAACG  
TGGAGTCGCCCATCAACCAGATCGCCTTCTCGCCCAACCGCTTCTGGATGTGCGTTCGCGACGGAGAGGTC  
TCTGTCCGTGTACGACCTCGAGAGCAAGGCCGTGATTGCGGAGCTGACGCCGGACGGCGGAAGCCGTCC  
GAGTGCATCTCCATCGCTGGTCCGCGGACGGCAACACCCTGTACTCCGGCCACAAGGACAACCTGATCC  
GCGTGTGGTCCATCTCCGACGCGGAGTAA

>AF406767 1235, 1684 centrin

ATGGCTGCGCTGACGGATGAACAGATTGCGGAGGCCTTCAACCTCTTCGACGCCGACGGCTCTGGCGCTA  
TCGACGCGGAGGAGATGGCGCTAGCGATGAAGGGTCTCGGGTTCGGTGACCTGTGCGCGACGAGGTGGA  
GCGCATTATCCGCTCTATGCACACAGACTCGAACGGTCTGGTGGCGTACGGCGAGTTTGGAGCCATGGTC  
AAGTCGCGCATGGCGCAGAAGGACTCGCCGAGGAGATCCTAAAGGCCTTTCAGCTCTTCGACCTCGATA  
AGAAAGGCAAAATCTCCTTTGCGAACTTGAAGGAGTTGCGAACTGCTGGGTGAGAACCCCGGCGACGA  
TGTGCTGAAGGAGATGATCGCCGAGGCCGATGAGGACGGTGTGGCGAGGTGTCCTTCGAGGAGTTCAAG  
AGCGTGATGCTGCACATGCGTGAAAAGTAG

>AF424693 1, 1698 lap

ATGCTTCGTGCGGTGCTGTCTCGTGGCCACTCCCACAGTCGCTGTGCGTGGGCCCCACGTGCAAGCTGA  
CGGTGAACAAGGGCAAGCTCGCCAAGAGCCGTGGAGTTCATGTGCACTTCTCACCATCGCCGAGTGTGC  
AGCGGCGGCGGTGATGCTAGCGCCCTATTCCACCAGGCTTTACCGGCAAGGCAGGGGAGGTGACTTC  
CAGACCCTCTGGACGACCGCGCAGGATCCGGCCACAGCGGAGAGCGTTCTGAGAAAGAGTGGCCGAAAGG  
CAGCCGGGGCCAGGCGGCTGCGGAAAAGCCTGCCGAGCTCGTGGCTGGCATGGGGGCCACTCCACGGT  
GCGGGATTACCGCCTCGCGTACGCGCCCGTGC GCAAAGCCAAGATGTGCAACGCCGCGTGGGTGTCA  
CTGCACCCGCGGAAGCAAGATGTCTTTACCATGACAGACCCGTACCACCCGCCACAGCGGTGAAGAGCC  
ACGAGATGGTGGAAAAACCGCCATCTTCGCGGTGACGGGGCGTACCAGTACGACCCGCTGAAATCGGG  
CACCCTCGCTCCAAGATTCTGCACAGACGGGCAGAACCCGCGGAGGCGGGCGGAATCGCGGGCTAAG  
CCACCCGCTGCTCCACAGCCCGGATGGAGCTTGTCTGGCGTCAAGCAATGCGCAGGCGGTGCGCGCGG  
GTGAGGTGATCGGGCACTGCGTCAACGAAGCGCGGAACCTCGGCAACCTGCGCGAGGACGAAGGTGTGCC  
GGAGTTCTATGCGGAGTGGGCGAAGAAATACATGATACCGGAGGGCATCAAGGTGCGCAAGGTGCTGCGC  
GGACAGCAGCTCGAGGAGGCGGGCTTGACCTCATGTACAACGTGCGCCGCGGCTCCCGCTATGAGCCGT  
ACTTGGTGGTGTGAGTACATCGGCAATCCCCGCTCGAGCGCGACGACGGCCATCGTGGGCAAGGGCGT

GACCTTCGACTGCGGGCGCCTGAACATCAAGCCCTATACCTCGATGGAGACGATGCACAGCGACATGATG  
GGGGCGCCACCGCGTTCTGCACTCTCAAGGCGATCGCGAAACTGCAGCTGCCCATCAACGTTGTGGCCG  
CGGTCCGACTCGTGGAGAACGCCATCGGCCCCGAAAGCTACCACCCCTCCTCCATCATTACTAGCCTCAA  
GGGGCTCACGGTGGAGGTGCTCAACACTGATGCTGAGGGCCGCCTGGTACTGGCAGATGTGCTCACATAC  
GTGCAGAAGTACGCACCACTCGATAAGAAGCCTACCCGCATCATCGACCTTGCCACGCTCACAGGTGCCA  
TTATTGTGGTCTCGGCTCGCGCCGCGCCGGTGTGTTTTCGCCATCTGCGATGCTGGCGAATTCGCTAAT  
GGCTGCCGGCACTCAGTGCGGGGAGGAGCTGTGGCCGATGCCGATCGGTGACGAGCACAAGGACATGATG  
AAGGGCGGCATTGCCGATCTGATTAACGCTGCTCCCGTTCGGCAGGCCGGCTCCTGCACCGCCGCGCGT  
TCCTCTCCAACCTTTGTAGAGCCGGAGGTGCAGTGGGCGCACCTCGATATCGCCGGCGTTGCAGATGTCCG  
AGACAAGCCCAAGGGCTACGAGCCGGCTGGTGTGACGGGCTTTGGTGTGCAGCTTCTGGTCGACTTCCTG  
CGCCACAACAAGCCTTAA

>AF441859 1, 1425 RNHII

ATGCTCCACGCATGGCGCTTCGTTCCCTCTTGACGTAGTACGTCCGCCCTTGGCAGTGGGCTGCTCCGGC  
CCAGTCGCGTTCTCCGGCAGAAGCGACTCGCCTATTCCCCTTTCAGGCCACCGCCGACATGGAACGCGCT  
GCAGAAGGTGGAGGTGGGACATCGCCAGACGGACACGGGCGAGCCTACACTCGATGGCACGCTGGACCTG  
GTCGGGTACCAGCTCTCTCGCGACGGTCTGCTGCCTCAGACGAACATCTTAGGCCGCACGCTGCCGGTTC  
CCGATAACCAGTGGCATCTCTGCGGCGACTCGTCTGTAAGCTGGAGCGAGAGAGAGATGTGGCGGTGGCGCA  
CATGAAGAGGCACGGCGTGCGGCTGAGGCGCAGCATCAAGGAAACAGCCGTGACGATCGGATGCGATGAG  
GCGGGCAGAGGCCCACTTGCCGGCCCTGTCGTGCGCGCCCGCTCTCGCGCATTCCCCTCTCCAGCTTCA  
ACAACGAATTTGACCAGCTGTACGAGGCACCCGAGCAGTTTTAGATCTTCGACAGTAAGTCCGTTTCGGA  
GCGGCAGCGCAGCTCGTGTGTTGCCATGATACCCGGACACGTGATTTCTTCGACATTGCCAGTTGCAAG  
AAGTTTGTGCTGCACCACTGCGCCGGTGTGAGGCGACATCGTTGACGCTGAGCAGTAAGAAGCTCGACT  
CCCACGTGAAGCTATCGAAGCTGCCCTTCAAGAAGCTGCTCTCCATGCAAACACCGTATCTGATCACCTA  
TCACGGGTACAACAGCGCAGGCAACTACGTGTACTTCTGGTCCATCGGCATTGCCAACACACCTACATT  
GATGAGTACAACATCTACAACGCCTCCATGAACACGATGCACCGCTCCGCTCAGTCGATTTGGCACATGC  
TGAGCGACGCGCTTCTCGCACGAGGCGGCGCCGCGCCGCTCATCCAGCATCGCGCAGTACCTGTT  
CAGCCGCTTCTGCACCGCCGCAACCACGACAACGAGAAGCGCTATCAGGTGCCGCATCACCTGGAGCTC  
CTGAAAGGGGCCACCGAGTACTTCGACTTTGAACCAATACAGCCTCCGCTAGTTCTCATCGACGGCCATG  
CCGTGCCGGGCCGAGCTACGACTACTTACCAGCGTTTCGTATTGGTGGCGATGTGCAGCCCATCATCGA  
GGGCGACAAGCGCAGCCTCTCCATCGCCGCTGCGTCTGTTGCCAAGGTACCCCGTGACGAGCTCATG  
AACTACATCGACGCCCTTACCCGGGCTACGGCTTTCGGGACAACAAAGGATATCCGGTTCGAGCAGCACA  
TGAAGTACGTGGCCAAGAACGACTGTGTCCGATACACCGCAAACATATCGCCCATGCCGCACGGTGTGCT  
GGAGAAGGGGCTGCAGAGGAAGTGA

>AF461507 1, 2295 farnesyltransferase alpha subunit

ATGCGTCTTCGCATGGGCACCGCAGGCGGATGCAGCGTTTCGAGCAGCACATCCACCCCGTCTCGGTAT  
CGTCCTGGACGGCTGCCTCCTCCGCTTGCTCGCAGAATTCGAGGATGGAGAGTGGCTTTACGAGCTCGC  
CTGCGTCGAGACCTTCATGCCGCTTGCTGCGGACGTGACACCAGCAGACGAGAGTCCCGGTGCATCTCCA  
GAGCACCCCGTTCGCGAAAATTAACCTACCCGCCGAACCTCAGCTGCATCTACGGCGTATACCGCTCACTTC  
GCGGTCAACTGGAGTACACCCCGGCGCTCCCGGCCCGCGGCGAGCGATGTGGGGGTGGTGTGAGTTGCCGCC  
TGTGATTCATGCCATCCGCACCTCAGCGGCACGCTGGTTTTCTTCTGCTGGCGTTTGCATTCGTGAGTGC  
ACCTCCAACCTACACCGTCTGAAAAGACCGACGCGATGTACTCATGTCCCCTGCGGTGTTGGAGCAAGCGA  
CCCGTGACGCGCTGCCGAACTTCCGGTACCGGCGGCCATCCTTTCTGCACCGCCTCGGAGGCAGACAA  
GCAAGAGGGCGCTGCGGGAGCTGGACGAAAAGCAGACGAAGCTGAGGCTGACGTACAGCACTGGCTCCCT  
GCGCGCGCCGACATTGCATGGGAAGTTCGACTGAGCCCGTGGCGTTCGGTTCGCTGGGAGCTGACGGCGG  
TCGGTTGCTTACACGGCTGTATCATAAGAACTTTCAGGTGTGGCATCACCGAAAGGAGCTGCTGACGTA

CGCTCTCCAGCAGAGCCCCTCTCACGTCCGATGCGGTGTGGACGCCGCGGCCACGGATGAAAAGCTGGAG  
CAGCAGGTGGAGGACAGCAGTCCGTTTTGTGCCCTCTTGGCGAGTGAGGCAACATTTAGCGATTACCTGC  
GCCGCCATGACGGCCTCGACTTTGCCGCGGTGACGAACGGCCGACGTTGCCGCGGTGCTGTGCAACGA  
GGATGGAAAAAATATCATGCCTGGCTGCACCTGTCTTGGTACTTGCATGTTTTCTCCTTTCTGCTGACG  
CCGCCGTGCGGGAAGGCCCTGGATGAGCACGCGACGGTGGCTACAGCTGCCGCAGCTGATCAAGTCTGC  
GCTTTACGCCGCAACCCGACTGGATCACTACCCGGGAGAACGCAGCGGTGGCGGCGCTGCGCCCCACCCT  
ACCACCAAGTCCACTCACCGAGGAGATGCAGTTCACGGCGCAGCTTATCTATCAAGACTGCCGCAACAAC  
TCTGCGTGGTGCCACCGCTTCGCCCTCTTTAGGGAAGCCCTGCTTCGTCTCTCTGGCAGCAGCTCTGCT  
CCGAGGCTTGACCAGTTCGGTTCGGCGCACCCACAAACAGCGAGAAGTGGCCGGGTACCCTGCGAGGCAT  
TTGTGCAGTGGAGCTGAATTACTCGCTGCAGTGGTTGTATGTGGACCCAACGAACGAGGCCGCTACACC  
CACGCCCGCTCCGTTGCCCTCCTCTTCCACACACTCATCACGCGACGGCACGTGTGGCGGCAGAGCACG  
CCAGCACGGACGGTAGTGAGGAGCTTACGCGATACCTCACCAACGCCCCATTGCTCCCCCGGTGCGACT  
GGCGAACTCTGAAATGTGCGCCGACGCCGACGCCGACCGTCAGCCCCTCCACGCCACTTGCGCGTCTC  
CTCCGTGGCCGCCACCGCTGTGTCCCGTGGGTACCTACGTGGAGAGCTTCGCACTGCTGCGGCACATGC  
AGCGGGTGTGCACTGTCACTCCGGCTCCGGGTTACCGAGCTGGAGGCGCAGGCCGGCGCGCTCTTGCG  
CTTGGCGGCGGCGAGCAACACGAGAAGCACATCGGGGCAAGCACCCAAGTCGGAGGCGATTGCCGAGCTA  
AAGACTCTCTACGAGCGCAGCTCTCAGTACATGCTGGATAGCTTCCACCAGGTCGACACAGCGCAGTACT  
TGGCCTGTACGCAATCCTGGAGGAGATGTGGCTGTCTGATGACGCGGCACAGCGACGCGAGGTTGCA  
GCAGCTTCGCCCCTCGGAGGCGTACC CGGAGGTTCTCCAGCCGGAGTGGCTGAAAACCTGTCCGTGGGAT  
GAGCCGAAGACGAGCACAATGGACGCCGCAAGCAGGAAGACGGTCAGGATGCTGTCTGCTCCTCGACTTCC  
TGGCCTACGAGGCCGCTGCGTTGAGCAAGGCAAAACAGCTGACGGTGGCGGACCCGATCCGTCTTAAGTA  
TTGGAAGAACGAGGTTCTTAACGTTATCTACCGCGGCTATGGCATGTCTGTCTGA

>AF461508 1, 2178 farnesyltransferase beta subunit

ATGATGAACTTAGCACCGGACACCATCACAAATAGGGGCGCAGCGCAACACGGAGCTGCTGCTGCTCGAGT  
ACCTGCGCAGCACGAACCCTCACATTCACGCCCTGTGGCAGCGTCACCCGAACAAAGACAACGACGCCTC  
CTCTTCATCCGCCGCTCGTTCGCCGTCGAAGGACACTCGTGGCGCCAGTGGTAGCGATGTCCGAGACGCC  
AACGCCTCCTCCTCCTCAGCAGCGTTCGGCATTGAGGGAGTTCGACTACACGGAGCCGCGCCTCTACC  
GTGCCGACACGTCATTTCTCATGAAAACCTCAGCGTGGCTCCACAGGGCTTCTCCAGTCTCTATCC  
GTCGCGACCGTGGATCGTATACTGGGCCTTGCAAGCTGCCGACGTGCTGAATTCATGGAGAGCGAAGTG  
CTGCACCGTACCCCGCGAGCGCCATCGTGGCGTTCCTGCACAGCTGCCTCAGCGTCGACCACACATGCC  
AAGCGGAGGTGAACAACCGGCTCGCGGCTGCCGCCACGTCTGCCCGTGGAGCCCCGGAAGGAAAAGACCC  
CCACGTACCCGGGACACCTCTGGAGAGCAGCACAACATCCGTGACACTCGAGAGGGACAGCGCTGACGCG  
ACGAGTGCCACCTTGATGCCGCCAGTGGAGACGCCGAGAGGTGGCTGAAGGTCCCTCACGGCCGTTGA  
TGGGTTTTTGAGGAGGCGCCACGCACCAAGAGCCACACATCGCCTCCTCCTACGCAGCCTGCTGCGCTCT  
CGCGATGCTGAGCTGGTATGGCGACGGGGCGCCGCTGCGGCAGCTCCCGCGCGCCGCTATCAAGCGGTGG  
CTCCTCACGCTGCGCAACGAGGACGGTAGCTTTCGCGTGCATGGCGGAGGCGAGTCGGATATTCGCGCCT  
CGTACTGTGCCGCCGTCATAACAACCTCCTCGGGCTCGATGATCCGACAACCTTTGACGGCGAGGCCGG  
CCGCTGCGAGTTTGTGGACGACGTGCGCGACGTTCCGGTGCTAACCCCTGCAGACGGCGCGCTTCGTCCGC  
GCGTGTGACACCCACGAAGGCGGCTTACATGCTCGCCCACCGCTCGGAGGCGCACGGGGCATAACCCC  
AGTGCGGGCTGGCCGCCCTACTGCTCATGAAGCAGCCGCACATGGTGCATCAGGCGTCACTGCGTCCGTG  
GCTGGCCGCGCTCAACTGAACTATGAGGGCGGCTTCAATGGTTCGCACAAAACAGCTGGTTCGACTCTTGC  
TACTCGCATTGGATCGGCGCATCGCACGTGCTGCTGCGCACGGTCGAGGCATACACAAAATGCTTCACAG  
AAGTGCCTACCACACATTCGCGCAACGGAGACGGTACAGGAGGTTGCGAAGATGGTTATAGGGAGGATGT  
AGATTGCACCCCGTCCGCTCGTTGTCTTCGGGCCCGGAGGTTAGTGTGCTGGATCATGCGGAGCTACTC  
GACGCAAAAATGATTCACGCTAGCGCCGATGACGCCTGGGACCGTGGCGAGAGTGCACATCTTACGCGAC

TGGGTGTAGTGGATCAGTTTCTCGGCGCCGATGATGCGGTGCTGCGGTGCGGCGGAAGAAAAAGAACCGC  
CGTCACAGCCTTGTACGAGCGCCTACTGGAGAGCCGGCTCGCTGCGGTGCGCAGCTGTGACGGCAACGGT  
GACGCGGCCGCGGGAGACGTGCAGGGCAGCCTGGAGGCATGGCGAGCGGCCAAGCGTTCCTCTATGCTG  
ACGTTCGGCGACTTCTACTTTAACAGCGCAAATTGCAGGACTACGTCTGCGCTGTTGCCAGGACTCCGA  
GATTGGCGGCTTGTATGGACAAGCCTCAAACAGCGCACGACGGGTACCACACCTGCTACTCGCTCTCGGGG  
TTGAGTGCAGCGCAGAACTTGCAGTACCGGACTCATGTACCGCCGCGGATGCCGCTACCCGTCCACCT  
ACCTTGAACGCGCCTTTGCCCGCTCGTACCTCCCAGGGCGCGAGAGTGGCAGCACAAGCGGCAATGAGGA  
AGGTAGCTGTGGCGTAGTGTGGGCTTACCAAACACCTCCGCCGCTGCGGAGTCGATGCTTCTTCGGACG  
ACGAGCCCAGATCTTTAACATACATCAATCGCGCGTGTCTCTGCCCTGCGTGCATGGAGCGTGAAAGCCT  
TCGTGTAA

>AF467951 1, 798 ribosomal protein S2

ATGGCAGATACTCAGCCTGCTCAGGAGGCCCGCCGCGGACGCCCCCGCGCGGAACGCAACTTCGGCC  
GAGGCCGTGGCGGACGCGGTGGCCGTGGCCGTGGCCGCGGTGGCCCGGGTGAAGGAGAAAGAGTGGGTCCC  
GTGCACCAAGCTGGGCCGCTCGTGAAGGCGCAGAAGTACCTCTCTGGAAGAGATCTTCCTCTTCTCG  
ATGCCCATCAAGGAGCACCAGATCGTGCACACCCTCATCGCTGAGGGTAAGCTGCACGATGAGATGATGA  
AGATTTACCCCGTGCAGAAGGCCACATCGGCCGGCCAGCGCACCCGCTTCAAGGCATTCAACGTCGTGCG  
CGACTGTGACGGCCACATCGGCATCGGTGCCCGCGTGGCAAGGAGGTGTGCGTGGCGATTTCGGCCTCG  
ATGATTGGGCCAAGCTCAACATCGTGCCTGGTGGCCGCGGCTACTGGGGCAACAAGATCGGTGAGCCAC  
ACACGATCCCAGTGAAGGTGACCGGCAAGTGCAGTTCCTGCGCGTCCGTCTCGTGGCCGCGCCCCGCG  
TACCGGCATCGTGCAGCCCCCGTGCCTAAGAAGATCCTCGAGTTTGGCGGTGTGAGGACGTGTACACG  
AGTCCCGTGGCAAAAACCGCACGCACGGCAACCTAATCATGGCCACTTTCTACGCCCTGCGCAAGACCT  
ACGGCTTCTCACGCCCCGACCTCTGGGCGGACACGGAGCCCAGCCGCGATCCGACCGACGAGCATGGTGA  
GCTGCTTGGCGAGATGACCACCGCTAA

>AF507947 1, 1149 ICAM-L

ATGGCGCAGCAGCGGGGAAGAGGGCAGTGCCGTCAAAGGCAGCCGTGGCGAATGCGTCTGCAAGTGGCG  
CTGACCCGCGCCGTTCTTTTCCATGGGGCCCGCCACCTTACCGACGCCATCGTCATACCAAGGTCAT  
TTCGGTCTGTGCTGCCATTGCGCCACTTGGGTGACCGCAACATCCTGCATACGACGCTTCTGAAGAAGTTG  
CTCCATCGTCCCTACGAGGCATCTGCAGAGGACCTCGCCAAACAGCAGCTCTCGCAACAGGCGACCGACG  
ATGGCGGCAAGCATGGCCGCGGTGCACACAGCGCGCTCGACAACCTTGGCGGACCCACGTGTCATCTTC  
GTCGACACCCTACGTGATTGTCCACATCAAGTCCGCTGAGATTCACGCCGACACGGCTCGCCAGGTAAC  
CCGCGCGGGGATGTGCAGGTGAACGTGATGGTGACCCTCGTGCAGCTCGCCTCCAGCACGGGATCTGCG  
CCGGTGTCTCGGAGGCGTGCCTTACGTGCTGCATGCAAGTGCGGGTACCGACAGTGGCCGTGTCCGC  
CGCGGTGGCAGCCAGGGGAGTACGGACGATGCGGCAACACTGTTACTCAGGGATGCTTCGGAGGCAGGC  
ACCGATAATGTGTGCGCAGGAAGGGTCAAAGACGCGAAGGCAGAGCCGAGCGGTGGCGATGCAGCGCTCG  
ATGCCTCCGTGTACGCCACCACGACGGCTGCTGCCGCAAGCGCAGCTGCTGCACTGGCGTCCCTGAGGA  
TCAACAGCTGCGCGTGACAGCGCGGTGCCTAGAGGACGAGCCGATCGTGCCAGGTCAAGCAGTCTTGCTC  
ATCTCCGAGCCGGCCGCTATGCGCTGCATGGGCATCCGGCCCGCGTGCAGCACCAGGCCGTTTTACC  
TAACAGAAAACGACGCAACCGTCCGCTCAGTTCTCCAGCGGGAGGCAGAGGGCGGGCCTGAGGCGAGGCC  
GAAGAAGCGCGCACGCAAGTACGCGCGTCCGCCGGCGGCACAGGTGGTGTACACCAGCGGTGCTATC  
GTGTCCATCGAGTGCGCCATCCGAAAAGAGAGGAGGATGGGGAGGGCGGCGCAGCGGCAGGCACCCGCA  
AGGGCCCGGTAAGCGACCACACTTAA

>AF523363\_0 12, 2826 ORF-q

ATGACGCGGTGGAACCAGCGGATGGCCAAGATGGCCTTCCGGCGCTCCAAATTCCGTGCTTAGCCTGGG  
GCGACGGTGACCCGTACCCCTACACCCCGCGGCCACCTTCCGCTATCAGTGGGACGACTGGCCGATGTG  
GGAAAAGATGTGGCACCTCGCTGTGCGCGTGTGGCGTGCAGTTTGGCGTGTGGCCTACTACTCGAAA

CTGAACAGCCGCATGGACTGGGCGCGGAGGAGGCGCTGCGTCGCATGCGTCTGCGCCGTGAGGCCAGG  
AGCTGATGATCCTCGAGGGCGAGACCTTCCCAGCGACATCCAGCCGGACCGCCACTGA

>AF523363\_1 935, 2826 QDPR

ATGAAAAATGTA CTCTCATCGGTGCTCGCGGCGCCCTTGGTCTGTCGCGTTCGCGAACGCCTTTGCCAACG  
GCAAATGGTCCATCATCAGTGTAGATCAGGCAGCTGCTGTCCAGCAGGGCGATGAGTGTGCGCTGTCAA  
CCCGGCAAGCTCCATCGAGGAGCTGCAGCAGGCCTACAAGTCTGCGGTACCCGACTCAAGGTTGACGCA  
GTGATCAACGTGGCTGGCGGTTGGGCGGCGGCTCTGTGCGGACGCCAGCACCGCTGCCTCGACAGAGC  
TGATGCTGAGACAATCGCTTCTCCTCCGTAGCGGCGGCACATGTGTTTCACTACGCAGGGTGAAAAAAA  
TGGACTGCTTCTTCTACCCGGCGCAGCGGCTGCTGTGAGCCCCACACCCGGTATGATTGGATACGGCACA  
GCAAAGTCTGCAGTGCACCTTCTCTGCCAGTCTATCGCGGAAGACCCATCCGTGTTGCCGACAGATGCCA  
GTGTCTGGCTATCCTCCCCTACTCCTTGACACTCCCGGAAATAGAAGTGCATGCCTCATGCTGACCG  
CTCCACGTGGACGTCGCTCGAGGACGTGGCGCAGCAAATCGTGGAGTGGAGCAATGGAAGTCTGTCGCTCT  
GCTAGCGGATCACTCGTTAAGATCGTTACAGAAAACCTCGAAGACGCGTTTTATTGTGTAG

>AF523363\_2 2164, 2826 20S proteasome beta 7 subunit

ATGGCGTCTGGCGCATCTGTATCGCGATCAAGTACAACGGCGGCGTACTGATGGCGGCGGACACGCTGC  
TGTCTACGGGTCTCTCGCCAAGTGGCCCAACATCCCAGCGCATCAAGTGTCTCGGCAGCCACTCCGCCGT  
GTGCGCCACGGGACGCTACGCCGACTTCCAGATGATGGCGAAGCAGGTGGAGGACAACATTGAGCGGCAG  
AGGATGTA TACAACGTGGACGAGTTGAACCCAGTGAAGTGTTCAGCTACCTGCACCGCTCCATCTACC  
AGAAGCGCTGCGACTTCGAGCCGTGCCTGTGTGATGGTCTTCAATTGGCGTGGCGGACAGCGAGACGTT  
TCTGGCGGCGCGTGGACGACGTCGGCACGCGCTGGGAGGACGACTGCGTTCGCGACCCGGCTACGGCGCGTAC  
ATCGCACTGCCGCTGCTGCGCCAGGCGCTGGAGAAGAATCCGGGCGGCGCTGTCGCGGGCCAGGCGGTGC  
AGATCCTCACCGACTGCCTGCGTGTGCTCTTCTACCGGAGTGCCGCACCATCAACAAGTTTCAGATGGC  
CGACGCGCGCGGCGACGGTGTGCGCATCAGCGAGCCCTTCGACGTGGAGACGAACTGGGAGTACGAGGGC  
TTCTGCTTCGAGAAGACGGCCATCATCCGCTGA

>AF532102 29, 184 A2

ATGAAGATCTGCAGCGTGCCTCCGCTTGTCTGTTGCTGGTGTGCGTTCGCGCGATGCTCGCACTCAGCG  
CCTCCGCTGAGCCGCACAAGGCAGCCGTTGACGTGCGAACGCTCTCTGTGGCCTGCAGGCCGTTGACGT  
TGGCCCCGGTGTCTGTA

>AF542055 208, 657 ribonuclease HI

ATGCAAGAAGTACGATCTATTCCGATGGCGCCTGCAAAGGCAATCCCGGCCCCGGCGGCTGGGGTGCCG  
TGCTGGTTCGCAATGGCCACGTCAAGGAGCTGTTCCGCGGCGAGGCCAATACCACCAACAACCGGATGGA  
GCTGACCGCCGTCATCGAGGCGCTGCGCGCGCTGAAGCGGCCTTGCAAGGTGCAGGTCTGGACCGACTCC  
CAGTACGTGCAGAAAGGCATCTCCGAATGGATCCGCGGCTGGAAGGCGCGCGGCTGGAAGACCGCGGAGA  
AGAAGCCCGTCAAGAACGCCGACCTGTGGCAGGCGCTCGACGCCCGCGGCGGAGCAGCAGATCTCGTG  
GCACTGGGTACGCGGCCACAACGCCATCCGGGCAACGAACGGGCCGATGCGCTGGCCAATCGCGGTGTC  
GCCTCGCTCACCGCGCCAGGTTGAGTAG

>AF544253 1, 906 ribonuclease H(35)

ATGACGGATACGCCATCGGCTCTCAGTGC CGGCTGTGACGCGACTCAGCGGCACGAAGCGCCCGCGCG  
AGTTCGCTTATCGAGTTCGCTGTGAAGGACATCATGGAGTCGCTTGGCGTGAGCGAGGATTA CTTGGTATT  
GGGCATCGATGAGGCAGGTGCGAGTCCCGTATCGGCCCATGGTCTACACCGCGCTGTCA TTTTCGCTG  
GGTGAGCAGCAGCCTTGTGCGGTTGTGCCATGTGGCAGACAGTAAGATGCTTAATGAGCGACGCCGAC  
TCGCCTCCCTGCAGCAGCTGCGCCAGCTCAAGACGTTCCGCTCCTTCACTGTGTGCGTCTCTCCCGAGGA  
AATCTCGAAGACCATGACAGGCCGTAGCGGCCGTA ACTCGAATACGCTGAGCCACGAGACAGCCATTCAA  
ATCATCTCCGAGGCAACGCTGGCCTCCGCTGGCAAGCTCTGCGCCGCATACGTAGACTGTGCGTCCAC  
CTGAGACGTACCAGGCGCGCCTGGCTGGCCGTTTTCTCACCTGCGTGTAACCGTTGCAAAGAAGGCCGA

CTCCATATTCCCAATTGTGTCCGCGGCGTCTATTGTTGCCAAGACGGTGCGAGACACCGCCATCGAGGCG  
 CTCGGCGAGAACATAGGCAGCGGGTACCCAGTGATCCTCGCACGATGGAGTGGCTGCGGTGCGCACGTGC  
 ATCGCTTTTTTCAGTTTCCCGCACGCCTATGACTTTGCGCGGCACTCGTGGGGCCCTCTCGTGCAGCTTGC  
 CAACGACCCGCGGTGCGCGTGCCCGTGGTGTGTGAGCAGGATCTCGAGGGGGCGAGACAGCAAGGGCGG  
 GGCGGCGACAGCCGGCAGCAGAAGCTCAGCTTCGCGAAGCCCTCGCCGAAGCGGCACATGGTGTAG  
 >AJ223860 211, 528 sw3.0  
 ATGTCTCTAATTCCGCCGCTGCTGCCGTTTCCGCCGCCACGACCTCGCCGCAGAAGTCTTCTCGCTCGT  
 CGCCGAAGAGGGCGGCCGTGGGCAAGAAGACCGGCGCAAGAAGGTTGCGAAGAAGACCGGCGCAAGAA  
 GGTGCGAAGAAGCCAGCGAAGAAGGTTGTGAAGAAGCCAGCGAAGAAGGTTGTGAAGAAGCCAGCGAAG  
 AAGGTTGTGAAGAAGGCTGTGAAGGCTGTGAAGAAGGCTGTGAAGAAGGTTGTGAAGGCTGTGAAGACC  
 CGAAGAAGTCGTGAAGAAATCCTCGGCGAAGAAGTAA  
 >AJ237587\_0 1674, 9556 haspa1  
 ATGGGAAGCTCTTGCACGAAGGACTCCGCAAAGGTGCCCCAGAAAAGTGCGGGTAACATCGATACGACCA  
 CTCGAAGCGATGAGAAGGACGGGCTCCTTGTGCAGCAGAACGACGGGGATGTGCAGAAGAAGAGCGAAGA  
 TGGAGACAACGTGGGAGAGGGAGGCAAGGGCAATGAGGATGGTAACGATGATCAGCCGAAGGAGCACGCT  
 GCCGGCAACTAG  
 >AJ237587\_1 3498, 9556 sherp1  
 ATGGACCAGGAGACAAGGGACCAGATGAAAAACGCCGCGGCGGAGGGCAAGGACAATGTGCACGACAAGA  
 TCCAGGAGCTGAAGGACGATGTGGGGAACAAGGCTGCAGAGGTCCGTGACGCAGTGAGCAGCACGGTTGA  
 GAGCATCAAGGACAAGCTAAGCGGTGGCTCGTAA  
 >AJ237587\_3 7183, 9556 haspb  
 ATGGGAAGCTCTTGCACGAAGGACTCCGCAAAGGAGCCCCAGAAAAGTGCGGATAAGATCAAGAGTACCA  
 ATGAGACCAACCAGGGAGGGAATGCGAGTGGCTCCCGGAAGAGCGCCGGCGGTCCGGCCAACGAATATGA  
 CCCGAAGGATGATGGCTTACGCGCAACAACGAAGACCGTTGCCCGAAGGAGGATGGCCATGCGCCGAAG  
 AACGATGACCATGCCCCGAAGGAGGATGGCCATGCGCCGAAGAACGATGACCATGCCCCGAAGGAGGATG  
 GCCATGCGCCGAAGAACGATGACCATGCCCCGAAGGAGGATGGCCATGCGCCGAAGAACGATGACCATGC  
 CCCGAAGGAGGATGGCCATGCGCCGAAGAACGATGACCATGCCCCGAAGGAGGATGGCCATGCGCCGAAG  
 AACGACGGGGATGTGCAGAAGAAGAGCGAAGATGGAGACAACGTGGGAGAGGGAGGCAAGGGCAATGAGG  
 ATGGTAACGATGATCAGCCGAAGGAGCACGCTGCCGGCAACTAG  
 >AJ237814 6, 302 lnp18  
 ATGACCTCGCCGCAGAAGTCTCCTCGCTCGTCCGCGAAGAAGACGGCTGCGAAGAAGGCCGCGGCGAAGA  
 AGGCCGCGGCGAAGAAGGCCGGGGCGAAGAAGGCCGGGGCGAAGAAGGCCGGTGAGGAAGGTGGCTACGCC  
 GAAGAAGCCGGCGAAGAAGGCTGCGAAGAAGGCCGCGAAGAAGCCGGCGAAGAAGGTCGCGAAGAAGCCG  
 GCGAAGAAGGCTGCGAAGAAGCCGGCGAAGAAGCCGGCGAAGAAGGCTGCGAAGAAGGCCGCGAAGAAGG  
 CCGCGGCGAAGAAGTAA  
 >AJ243188 1, 1119 mkk  
 ATGAAGAATCGACCCGCTCTCGCGCTGGATGCGGCAGTTGTGGAGAAGTTCCAGCAGGACTCGAAGTCTT  
 ATCAAATCAACAGCAACAACCTCTGTCAGTTCGGTGCCTTCTTCAATGAGGCCGGTATGTACACAAA  
 AGACGGCCCGGAGCTGCCGAGTACTGTGAAGAAGGATGACATTGACTACTCATCGAAGCGCAACGTGCGC  
 GCTGGAGCGGAGCGGCGACGTTTTTTTTCGCGCGCCTCAAAAAGGGCACATCGATTGCCCTGAAGCGTATTC  
 CCATCTCGTCCAAGGCGCATAGAGACGAGGTGACCGTGAGCTGCAGGTTTTTCATGGCCCGCGGCGATTCC  
 CCCGTATGTGATGAATAACTACGGCGCCTTTTGGGATGCCGAGGACGATGCGATTGTGATCCCGATGGAG  
 TGGATGCCGTACACAGTGAAGGACCTCGGACTGTTTTGGGGCGGACTCAACGAGGCACTCTTGAAGGCAG  
 TCTTCTTTTCAGGTGGTGTCTGGCCTGTTTTACCTGCATGATGTGAAGCGTGTGCTGCACCGTGACCTGAA  
 GCCGAGCAACCTGCTCATCAGCGAAACTGGCCACGTAAAGATTGCTGACTTTGGTGTGTCGAAGCTGATT

CAAACGCTTGCTGTGTCGTC AACGTACGTTGGCACCATGTGCTTCATGGCCCCAGAGAGGTTGGAGCAAG  
GCATGTACGGTTTTAGCAGCGATGTCTGGTCACTGGGACTCACTATGATCGGTGCTGTACC CGGCAAGAA  
CCCCTGGGCGCCCGGAGGAGATGAATCTCTACCAGCTGCTCGGTAAGATGGCTAACGGAAGCACACCG  
ACGCTTCTGAGTCCGGCGCGTTTTCCGACGACGTGAAAGACTTTGTGAAGCAGTGCCTCGAGCGTGACC  
CGGACACCCGCCAACGTGCGCAGAGCTGCTT CAGACCAATTCTTTGATGGGGTAACCACCGAAAGTGC  
TGTGGCGATGGTCAAGATGGCAGTGGAGCAGATGACTCGCCTCATCAATAACAACGCACAGAAGGAGACG  
GAAGTGGCTCGATCACAGGAGTCTCTGGAGAAGGATGTAAAGGCACAGCTTGATAAGATGGTGCTCTAG  
>AJ297564 440, 1585 PKAC2a

ATGCTAGTGAGTGTGAAGCCGAAACCTGAGGTGGCTGGCACAGCTCACGTACCCCTTGGGCCCACGGGGA  
CGAATGTGCGCGGTGCGTTTCCCATCACCGCTGCGTCCAGATCGGCGCATGCTATGTTTCTAGCACGTG  
GTACTCCGCTTTAAAACCCAAGTTCGCGTGAACCTTCGCAAAGCCAGACACCTCCAGCTGGAAACTCTCA  
GATTTGCAACTGAAGAACACGCTCGGCACCGGTTCTTTCGGCCGCGTGCGCATCGCCACCGCAAGGGCA  
CGGAGGAGTACTACGCGATCAAGTGCCTGAGAAAGCGCGAGATCATCAAGATGAAGCAGCAGCACGT  
TGCGCAGGAAAAGGGGATCCTAATGGAGCTGTGTACCCGTTTCATCGTGAACATGATGTGCTCCTTCCAG  
GACGAGAAGAAGGTGTACTTTCTGCTGGAGTTTGTTCATGGGCGGCGAGATGTTACGCACCTGCGCACTG  
CCGGGCGGTTCCCGAATGACGTTGCGAAGTTCTACCACGCGGAGCTGGTGCTTGCCTTCGAGTATCTGCA  
CTCGCTGGACGTGATCTACCGGATCTGAAGCCGGAGAATCTGCTGCTGGACAACAAGGGGCATGTGAAG  
ATGACGGACTTTGGGTTTGCGAAGAAGGTGCCGGACCGGACGTTACGCTGTGCGGGACACCGGAGTACC  
TTGCGCCGGAGGTGATCCAGAGCAAGGGCCACGGGAAGGCGGTGGACTGGTGGACGATGGGCGTGCTGCT  
GTACGAATTCATTGCCGATACCCGCCGTTCTACGACGACACGCCGTTCCGGATTTACGAGAAGATCCTT  
GCTGGGCGGCTGAAGTTCCCGAAC TGGTTTGACGGCCGCGCGCGACCTCGTGAAGGGGCTGCTGCAGA  
CGGACCATAACGAAGCGCTGGGACGCTGAAAGGCGGGCCGGCGGACGTGAAGAACCATCCGTACTTCCA  
CGGTGCGAACTGGGACAAGCTGTACGCACGTTACTACCCCGCGCCGATCCCTGTGCGGGTGAAGAGCCCT  
GGCGACACGAGCAACTTCGAGAAGTACCCGGACAGCCCGGTCGACCGCACGCTGCGCTGACGTGCGCGC  
AGCAGGCCGAATTGAAGGGGTTTTAA

>AJ297954 64, 838 PKAC2a

ATGCTAGTGAGTGTGAAGCCGAAACCTGAGGTGGCTGGCACAGCTCACGTACCCCTTGGGCCCACGGGGA  
CGAATGTGCGCGGTGCGTTTCCCATCACCGCTGCGTCCAGATCGGCGCATGCTATGTTTCTAGCACGTG  
GTACTCCGCTTTAAAACCCAAGGCGCTTATTACTTCGCAAAGCCAGACACCTCCAGCTGGAAACTCTCA  
GATTTGCAACTGAAGAACACGCTCGGCACCGGTTCTTTCGGCCGCGTGCGCATCGCCACCGCAAGGGCA  
CGGAGGAGTACTACGCGATCAAGTGCCTGAGAAAGCGCGAGATCATCAAGATGAAGCAGCAGCACGT  
TGCGCAGGAAAAGGGGATCCTAATGGAGCTGTGTACCCGTTTCATCGTGAACATGATGTGCTCCTTCCAG  
GACGAGAAGAAGGTGTACTTTCTGCTGGAGTTTGTTCATGGGCGGCGAGATGTTACGCACCTGCGCACTG  
CCGGGCGGTTCCCGAATGACGTTGCGAAGTTCTACCACGCGAAGCTGGTGCTTGCCTTCGAGTATCTGCA  
CTCGCTGGACGTGATCTACCGGATCTGAAGCCGGAGAATCTGCTGCTGGACAACAAGGGGCATGTGAAG  
ATGACGGACTTTGGGTTTGCGAAGAAGGTGCCGGACCGGACGTTACGCTGTGCGGGACACCGGAGTACC  
TTGCGCCGGAGGTGATCCAGAGCAAGGGCCACGGGAAGGCGGTGGACTGGTGGACGATGGGCGTGCTGCT  
GTACG

>AJ298026 1, 705 mpk1

GGCAGCGGCGCCTACGGAATCGTCTGGTGTGCCCTCGACCGCCGCACGGGCAAGTGCCTTGCCTCAAAA  
AGGTCTACGATGCCTTTGGCAACGTTCAAGATGCGCAGCGCACCTATCGGGAAGTGATGCTTTTGCAGCG  
ACTGCGGCACAACCCCTTCATCGTCCGCATCCTCGACGTGATTTCGTGCGGCCAACGACATTGACCTGTAC  
CTCGTTTTTGTAGTTGATAGAGGCCGATCTCACAGCCATTATCCGTA AAAACCTTCTGCAGCGCGATCACA  
AGCGCTTCTCACCTATCAGTTACTTCGCACAGTGGCGCAGCTTACGCACAGAACATCATTACCGGGA  
TTTTAAGCCGGCCAACGTATTTGTGAGCAGCGACTGCTCGATCAAGCTAGGGGACTTTGGTCTGGCTCGC



ACGTTTTCGCAGCGGCTTCGACAACGAGCAGGAGTTTCTCGACCTGACCGACTACATCGCAACTCGGTGGT  
ACCGGTCGCCGAGATTTTGGTCAAGTCGCGCGCTACTCCACAGCGATGGACATGTGGGCCGTCGGGTG  
TGTGATTGGGAGATGCTGCTGGGCCACCCACTCTTCGAGGGCCGCAACACGCTGGATCAACTCCGCCTG  
ATCGTCGAGGCTATCGGCGTCCGAGCGACGCAGACGTGCGCAGCCTTCACTCGCCCCGAGCTCGAGACTC  
TCATT

>AJ298055 1, 855 prp8

GAATTCTACATCTACGACGACTGGCAGCAGAGTTTGCAGTTCCAACCGATCACGTGCTTCAACCTACTGA  
ACCTGGTTCTGCGTGGCTACCACATAAATCTGCAGCGCACGCGCAAATTCTCGTTCCTGACCTGCACGT  
CGAGGTGAGCGCGTCTCACTTCTGGCCCACGTACGCGACCCGTGAGGAATGGGAGCAGGTGTCCATCCGT  
CTGCAGGAGATGATCATCGCCGACGCCGCGCCGCATGGACGTGAGCCGAAGGACTTCACGGAAAAGG  
AGAAGGAGGGCATTCTTCTGGGCAAGAGAATGACCAATGTGGAGATTGAGCAGGAGGAGATGAAAGAGAT  
CGAGGCCATGCAGCGCACAAAGCTGGCAGAGACGCAGACGGTCAACGTTGTCACGAGCAGCGCGACGTC  
GTGAAGCGCAAGGTGAAGGCCCTTCGACTTTGGAGCGACGGCGTTGAACAACAACCTGGCGTCCCCGCT  
CCTTGGCCGATGCCGCTTCTTGGACGAGAACAACCTCCATCACCTTCGACGCCGCCGCGCCACCGGGG  
AAGCGACCAGCTCATCTTCTCTGAGGACGCGATTGAGAAGTTGCTGGCGTGCTGCGACGTCAAGTTTCTCAG  
TGCTGCGCGTACATGCTTGGCCATGCGCTGCCGACTCGCCAAACATCAAGGAGGTGCTGTGTGTCATGA  
TCCCCGCCGAGTTTCGGGACGGCTGTGAGGCCCGCACGCCACCACGCATTCCGTTTGACGCGGCAGCACT  
GCAGGAGGCGAACCTGTCTTCTTGGACTCATGAGGATTGGCGAGAGCGAGGCGCAGCTGACCTCGCAC  
GACCTCGCCCTCCAG

>AJ304943 1, 859 dnap

CGATAACCAGGAGCTGAACATCTCGTCTGGTCCACCATTGGCCGCTGGACCTGAAACGACTTCCGCGCT  
TCCAGGGAACCGCGACTAACGTGAATCAGGAAAAGAGACGTGCATCGGGCGCCTTGTGTGGACTCCTA  
CTCACTCTCGCGGAGCACTACAAGACAGTGAATTACAGGCTGCTGTGCTTGCAGACCAGATGCAGCTG  
CAGGGGATTACAAAGGGCAGCAACAACCTTCGAGCCTGGCACCTCGGTGCTCACACCTGCGATGCTGTGCG  
CATCGCGCGACATCTACGATGTGCTGCTGCAGGTGTGCAACTGCGCTGTGCTGTCCACAGCGGTCTCTC  
ACATCTCGATGTGATTGACTGACCAAGCGCCTCACCAGATTGCAGGAAACCTGTGGAGCCGTACCCTC  
TTCGGTGTCTGCTCCGAGCGCATCGAGTATCTCCTGCTGCACACGTTCCACGACCTCAAGTTTATTACCC  
CTGATCGCTATGTGCAGGACTTCAAGCGGGCCGCGACGACGAGGAGGATGGCAAACGGAAGGCCAA  
GTACCAAGGGCGCATGGTACTCGACCCAAAGTGCGGCCTTTACTCGGATTACATTCTCCTCCTCGACTTC  
AACTCCCTGTACCCGTCGCTGATTGAGGAGTTCAGCATTTGCTTACCACCGTTCGATCGTGAATAACGGA  
GCGAGATCGATGTGCCACCACCGGAGAACCTCATCTGTGCTCGTGCGCCGAGCAGGCCTCTCCGCTCC  
GTGCTTGCACAAGTGTGTGCTGCCGAAGGTGATCAAGAGTCTCGTAGACAGCCGTCGCGAGGTGAAGCGG  
TTGATGAAGACAGAGAAGA

>AJ304948 1, 1209 rnap

TCGTGAAGGGCGCTGGAGGATGTGCACGCCTCCTACGACGGCACGGTGGGGAACAACCAGGAGCTCATCCA  
GCTGGCGTACGGCGAAGATCTGGACGGTGTCTCGATTGAGGGCAACCAGGCCTTCCCGATCCCGCACATG  
ACGAACAGTGAGATGGCTGACAAGTACCGCTACGAGTACAACGACGAAGGCAGCTTCTCGGAGAACATGG  
GCGGCCATTACATGGATCCGTTTGTGCGGACTCGCTGCTGGCCGACCCGACAGAGGCTGTTGAAGCTGCA  
GGAGGAGTTTGGAGCAGCTGATGAGGGATCGCGCGATGTGNNNCTCGTGATCGACATGGAGGACAAGAAC  
AAGCTCAAGATGAACCTGCCGTAACGTGCGCGGCTCATCCAGAACCGCCGACGACGATGGGCAAGC  
GCAGCCAGGTGTCCAATCTAAACCCGATCACTGTGATCAACCGCTGGAGCTGCAGGAGGACCTCGTGCA  
GCTGTTCCCGTCTACCACAAGGACTACAACGGCCGCTTCGTTAATGTGCTGAGCCAGCAGCGCTGGAG  
CGGGCCCTGACGCTCTTGGCATCCACTTGCGCCAGATCCTCGGCTCGAAGCGGGTGTGAAGGAGTACA  
AGCTGAACGACAAGGCGTTTCGAGTACCTGCTGAAGGAGATCCGCACCAAGTACCAGCAGTCCCTCATCAC  
CCCTGGTGAGATCATCGGCGCCATTGCCGCGAGTCGTGCGGTGAGCCCCGCCACCCAGATGACCTGAAT

ACCTTCCACAACGCCGCATTTTCGTCCAAGAACGTGACCCTCGCGGTGCCGCGCTGTTGGAGCTGCTGA  
ATGTGAGCAGGAACCAGCGCAACGCCAGCGTGGCCGTCTGCCTGATCCGCGAGTACCAGAAGCGCAACAA  
GGCTCAGGAGGGCAGCAGTTTATCGAGTACTGCACGCTGGCGAATATAACGACAACGGTGCAGATCATA  
TACGACCCCGACCCGCGCAACACCGTCTGTGGCCGAGGACGAGGAGATGATCCGGTGGGAGCAGGCGGTGA  
TGAATGCAGAGGATGAGGAGCCAGATCGGGAGCAGCCGCCGTACCTTTTCATTGCACGCCTCATCTCGA  
CAACGACCTCTTCAACGACAAGCGACTTAACATGAAAGACGTGAAAAGTGCGATCCGGCAGGTGGACGAC  
ACTTACATGGTGCAGGCAA

>AJ311570 1, 1959 tryS

ATGTCATCTCTGCAGCGCGCTCTGTGAGCTTTAATAAGCCGGGCCACATTCCGTTTGGTGCTGTGCAGG  
GATACGCCCCGGGTGGCGTCCCAGCGTACAGCAACAAGCAGCATCACTACTTCTCCGGCGAGCGCAACAT  
TGAGGACAACATCTTCTTCGGCTTCAAGTACCAGTGCCTCGAATTTGCGCGCCGCTGGCTACTGGTGCCT  
AAGGGACTGTTGCTGCCGACGTGAAGTGGCCCTGCCACATTTTCCAATTGAAGGAGGTGCCGGACGCCG  
CCACGACGGAGAGCTTCGCGGTATTGCAAGTGCACAACGGTACTACGACGAAGCCAGAGGCCGACGCGCT  
TCTTGTCTACCCCTCCACCGATGCAAATCCAGTTGGTCATGTCCGGCACCATCACCGAGGTGGGTGACGAC  
TACGTATGTGTCCGGATCAGAACTACCGCTTCCACAAGTGGGAGTCCCTCCTGCGCGTACAAGCTGAAGC  
TTGATCACAGGGACGGCATCTGGACCATCATCGATGACATTGACGCGGACGAAATCGAGATCCCCTTGG  
GTGGTTGACGTTTCTTGGCCGCGCAAATCGACCGGAAGGGGCGCCCGGGTGGCGCTGCATCCGTCACTG  
CACTTCAAGGAGCCGCCGAAGCCGTATCTGCTGCGCCGTAACCTTTCTGCCGACGGAGTCCAAGGCGAACT  
GGCTCGACATGAAACAACCCGGCGGAGCGGCTATTTGTGGAGGAGTTTGGCATGGACGTCAGCCGTACCCG  
CCTGGAGGAGAAGGTGCTCAGTACTACGAGTGAATCACGAGTTTACCTGCGGTGCGTCCGCTACGGA  
ACGCAGCTGCACGCCATCTTCATGGAGGCAACCCGCGCAGGTGATCGAGAGCGATGAGAAGCTCCGGCTCT  
TTGCCATTCTGAGGAGTTCTGGCCCCGCATCCGCCACTCGTGGAAGTACCAGCAGACGTACATTTCTGG  
TCGCTTCGACTTCGCTTCAACAACGAGACGGGCGAGGTCAAGTGCTTCGAGTACAATGCTGACAGCGCG  
TCGACGCTGCTAGAGTGGCCCTCATTACGAAAAGTGGGCCGAGTCCGGTGGGGCTGGACAAGCAGGACA  
CGCGCGGCTCCGGCTTCGCGGTGGAGCGCAACCTCAAGATGGCGTGGGCAAACAGCGGGGCGACTGGCCG  
CGTTCACTTCTGCGTTGATGAGGAAAGGGAAGAGCAGTACACGGCCCTCTACTGCATGCAGGCCGCTGAG  
GCAGTCCGGTTGGAGGGCAAGCTGTGCATCTTGTTCGATGAGTTCCGCTTTGATGATAATGGTACGTTG  
TCGATAGCGACGGCGTGCCTGTGCGCAATGTGTGGAAGACGTGGATGTGGGAGTCCGCCATCACGACTA  
TTACGCCGCCCGGAGGAGCGAGGCGGAACTGGAAGCCGTCCCCGAAGGACAAGGTGCGATTGTGTGAC  
TTGCTCCTCGCGGATGACTGGGAAATTTCTCTACTTCGAGCCGATGTGGAAAGTCATCCCAGCAACAAGG  
CCATCCTGCCATGATCTACCACAACCACCCGAACCCAGCCATCTTGAAGGCGGAGTACGAGTTGAC  
GGACGAGCTGCGCAAGCACGGGTACGCCAAGAAGCCGATTGTCCGCCGCGTGGGCAGCAACGTTATCATC  
ACCTCCGGCGACGGCGTGGTGCACGCTGAGTCTGGTGGCAAATATGGCAAGCGCAACATGATTTACCAAC  
AGCTGTTTGGAGCTGAAGAAGCAGGATGACTACTACGCCATCATCGCGGCTGGATGATCGCGGACGCCTT  
CAGCGGCACCCGCATCCGTGAGGACAAGTCAGTCATCACCGCGTGGACAGCCCTTCGCTGCCGTTCCG  
ATCAAGACCGACAACTTCCGCACCCCGTGACGCTCAAGGATATCGACAAGATGGCCGAGGACGAGTAA

>AJ313201 1, 1113 MST

ATGTCTGCTCCTGCTGCTGCGCCGAAACACCCGGGCAAGGTGTTTCTGGACCCGAGCGAGGTAAAGGACC  
ACCTTGCTGAGTACCGCATCGTGGACTGCCGGTACAGCTTGAAGATAAAGGACCACGGCAGCATCCAGTA  
CGCGAAGGAGCACGTGAAGAGCGCCATCCGCGCCGATGTGGATACGAACCTCTCTAAGTTGGTGGCCACC  
AGCACCGCCCGCATCCGCTACCGCCCTGTGCTGAGTTTATCGACTGGTGCATGGCGAACGGGATGGCGG  
GAGAGCTGCCAGTGCTCTGCTACGATGACGAGTGGCGGCCATGGGTGGATGCCGCTGTGGTGGATGCT  
GAACTCTTTGGCGCCGACGCGTACGTGATCAACGGCGGCTTTTCAGGCCTGCAAGGCTGCGGGGCTGGAG  
ATGGAGTCCGGCGAGCCCTCGTCCGCTGCCAAGACCCGCAACGCACTGGCCCTTCAAGACGGCCTTTCAGC  
ATCACTACCTTGTGGATGAAATCCCGCCCAACGCAATCATCACCGACGCGCGCTCCGCCGACCGCTTCG

CTCGACAGTACGACCTTACGCCGAGACAAGATGCCAGGCCACATCGAAGGTGCGCGTAACCTCCCCTAC  
ACGTCGCACCTCGTGACACGCGGTGACGGCAAGGTGCTGCGCAGTGAGGAAGAGATCCGCCACAACATCA  
TGACCGTTCGTGCAAGGCGCGGTGACGCGGTGATCTATCGAGCTTCGTCTTCTCCTGCGGCAGCGGCGT  
CACCGCCTGCATCAATATCGCCCTGGTGCACCACCTCGGCCTGGGCCATCCGTACCTCTACTGTGGCTCC  
TGGTCTGAGTACAGCGCCTCTCCGCCCCCCATAATGCGCAGCATCATCGACGACTACGGCATGTGCA  
TGCAAATGCAGACCCCTAGCCTCGGCGACAACCCGAAGGCAAACCTCGACACCATGACGCTGAAGGTGCA  
CGGCGCGCCCTGCGAGAGACCCGATGCGGAGGTGCAGAGCGCCGCAACCCACCTCCACGCTGGCGAGGCC  
GCTACCGTGTACTTCAAGAGCGGCCGCTCGTCACGATCGAGGTGCCGGCAGTGCCCAACTAA

>AJ548776 728, 1069 icp

ATGATCGCCCCGCTCAGTGTGAAGGACAACGACAAGTGGGTGGACACGCATGTCCGGCAAAACGACCGAGA  
TCCACCTGAAGGGCAACCCGACCACTGGATACATGTGGACGCGCGTTGGTTTTGTGGCAAAGATGTGCT  
CAGCGATGAGATCCTGGAAGTTGTCTGCAAGTACACGCCGACACCATCCTCGACTCCTATGGTGGGAGTT  
GGTGGCATCTACGTTGTGCTCGTAAACCGCGGAAAAGGGGCCATCACACGCTGGAGCTGGTCTACACGC  
GCCCTTCGAGGGCATCAAGCCAGAAAACGAGCGGTACACGTTGCACCTCAACGTGAAGTAG

>AJ548878 749, 1102 icp

ATGCAACCAAAAATGACGCCCCGCTCACTATGAAGGACAACAACAAGTGTGAGCGTGCGCGTCGGCA  
GCACGCTCGAGATCCACCTGGAGGGCAACCCCTACCACTGGCTACACGTGGACGCGCGTCGGCTTTGTGGG  
CAAGGAGATGCTCAGCGATGAGCACCTGGAGGTCACCTCCAAGTACACGCCGAAACAGTCTCGGGTTCT  
ATGGTGGGGGCTGGTGGCTCCTACACGGTGTTCGTAAACCGCTGAGAAAAGGGCCAGCACGCGGTACAGC  
TGGTCTACGCGCGCCCTTTCGAGGGCCCTAAGCCAGATAACGAGAGGTACACGTTGCACCTCAACGTTGA  
GTAG

>AJ578436 34, 633 top1a

ATGAAGGTGGAGAATAGCAAGATGGAGGTGAAGCGAGTGCAGAGCTACTCCAATGAAGATGAGGAGATCA  
ACGAGGAGGACCTGAACTGGTGGGAGCAGGAAAACCTCCGTATCGCCATGAAGGGCGAGCGTCGCTGGGA  
GACGCTGGCCACAATGGCGTCCTTTTTCCACCCGAGTACGAGCCCCACGGCATCCCCATCTTCTACGAT  
GGACGCGAGTTTAAGATGACGCCGGAGGAAGAAGAGGTGGCGACAATGTTCCGCGTGATGAAGGAGCACG  
ACTACTACCGCATGGAGGTGTTCTGGCGCAACTTCTTCGAAAGCTGGCGCGAGATCCTGGGCAAGCGCCA  
GCACCCCATCCGTGCTGAGCTCTGCGACTTCGAGCCATTTATCAGTGGTACCTCGTCCAGCGGGAA  
AAGAAGCTCAGCCGGACGAAAGAAGAGAAGGAGGCCATCAAGGAGAAGCAGGACGCGGAGGCAGAGCCGT  
ACCGCTACTGCGTGTGGGACGACGTCGCGAGCAGGTGGCGAATTTCCGCGTGAGCCGCCGGCCCTATT  
CCGCGGACGCGGCAAGCACCCCTAATGGGCAAGCTGAA

>AJ582069 1, 1353 tdr1

ATGGCCGCGCGCGCTAAAGCTGTACGTGTCGGCGACGTGCCCGTTCTGTACCGTGTGGAGATCGTTG  
CGCGGGAGAAGCAGGTCTCCTACGATCGGGTTGCTGTTGGGCTTCGCGAGGAGATGCCGCAATGGTACAA  
GCAGATCAACCCGCGTGAGACAGTGCCGACGCTGGAGGTGCGCAATGCGGAGAAGCGGTTTGTGTTGAG  
TCGATGCTGATCGCGCAGTACCTGGACAACAGTGGCGCGCCCGGGTGGCTGATGGGTGCCCTCGTCGG  
CGCAACGACACCAGATTGAGTTCTCCTCGCCCAGGTGCGCGATTTTCATTGCTGCTGCGCACGGGCTACT  
CCGCGACCCGCTGAGTGGTGAGAAGCGCAAGGCCGTGGATGACAACGCGGCGTACGTGGACGGGCTGCTC  
GCGGCGAACCCAGACGACGGGGCCATACTACTGCGACGCGGAGTTCACGATGGCGGACGTTGCGCTTGTGC  
CGTTCTGTTGCGACTGAAACCTGCTCTGATGTACTACGCCGGTACGACGTGTTCTGCAAGCGCCACG  
AATGAAGGTGCTGTGGCCGCTGCTGCTCAACGCACATCTGTGCGTGAGACGTCGCCGACGGCGGCACAG  
TGCATCGAGAACTACCGCCACCTGGTTCGGAGAGCGCGCAATGATGGGCGCAATGGCGGGCACGTGC  
TGTACAGCAATCTTTTCTGTCCTTTTGTGGACCGCGCACGCCTCGCGTGTGAGCTGCGCAAGTTCAGGT  
GCACACGGTGGAGGTGCCGCTGCATCCAGAGCCGAGTGGTACAAATATATCAATCCCCGCGATACGGTG  
CCTGCGCTATTTACGCCGAGCGGCGAGGCTGTACACGAGTCGACGCTGATTGTTTCAGTACATCGACTGCC

TGGCGACGGAGGGTACTGCGCTGGTGCCGCTGGGGACGCGGAGAAGGAGTACGAGGTGGGTTTCTTCGT  
GGAAAACGCTGGGTATTTCTGTTGGAGGACTGATGTCGTGGATCATCCGTGGTGGCGAGGATGCGAAGGCT  
GAGCTTCAGTGGGCTGCTGGCGAGCTCGAGCAGCAGCTGGCGAAACACCCGTTTGGTGAGGGCCCTTCT  
TCGGCGGCAAGAGGATGAACGCTGGCGATGTGGCCATTCTACCTTTCTGGTCCGTGCAAAGGCGTTTAT  
GCCGGAGTTTATGTGGCGGTACGATCTCTTCGCCACTTTCCGCTGCTGAATGTGCTGGCAGAGGCTGGC  
ATGGCGCACCGGAGGCGAAGGCGGTGTTTCGTACACTCGAGGAGTACAAGGAGCACATCCGTCAGCGTC  
AACGGAGGGCCCAGGGCGGGTAA

>AY026067 1, 528 dihydrolipoamide dehydrogenase-like protein

GAGAGCCTCGATCGCTACCTCGAGATTGACGAGGTCAAGATGCGGCAGTCAATGGAACAAGTGAGCCGCA  
TCCGCGAGGAGCAGATCCAGGCCGCACTCAAAGCCTCACCGAACGTAGAACTCGTGCTTGGCAGAGCGAC  
CTTTAGCAGCAACCACGAGATCCAGTGCCATAGCAAGCGGACGAAGGAGTTCCGCAGCATCACGGCGGAC  
TATTTTCATCGTCGCCACCGGATCGAAGCCACGCAAGCACCCCTTACGTGGCAGCAGACGGGCGGTTGGTGA  
TGACCTCCGACCACATCATGCGAGCCCCGCTGCCGAAGAGCTTGGTGATCGTGGGCGCTGGCGTGATCGG  
CTGCGAGTTTGGCAGCATCATCGGCCGCTCGGCAAAACGAAAGTCTCCATCATCGACAAGGCGCCGCAC  
ATTCTGCCACGGGAGGACCCCGACATTGTTTCGCATGATCGAGAGTGAATGGACCGCGCTGGCATCGTTG  
TCCACCACAACCTCCGACCTCTATGATATGCAGCCGTG

>AY034610\_1 2090, 3538 P9

ATGGAAGAGGGCGCGCCGCTAATGCGACAGCGTCACTACCGCCGTCCTATGAGTCTGTCCTCGTTTTTC  
TTACAACGCTGGCGCAGTGGCTCAAGCATGCGCGAGAGCGCCTGAAATGCCGAGACGAAGTCGGCCGACA  
CGCAATTGCGGTGGAGGTCTCACCCGCCACCGGAACGCGCCTATGAGCGGCTGGCAGAACTGTATGG  
CGTCATACAGCTGCTGCCGGTGACATAAGCACATCACTTTTTCCCTCTGCTTCAGTCGAGCTGGCCGCGT  
GGGTGCTGCTGCGGCTTCTCGTCCTCCTCCTTACCTGGTGGTTGCTGATTTCGGCTGGTGCGCGGACCAC  
CCTACCGGACTGCGCGCTCGCCAAATTGCGGTGCACCCTGACGTGCATCTGTCAAACGAGCGTCGAAAT  
GCACAGGCGGTAGAGGCGTTTATTCATCCCGACGCTGCTCAGCGCGGCATCAACGCCACGCTGCTGTTGA  
CTGTACAGCCTTGGCTGTGCGTGGCGTGCCTGCTCATTCTCTGCCTGCTTACAATGCATGTATGGGTGGA  
CGTAGTGCTGTTGCGCCTGCTCCAACATTGGACCGCCCCACTACGGCAGGCACAGGCGTGGGTGGCGTCG  
CATTGGTTGTGGCCCTCCAACAGCCCGCAGCCGGGCTCACTGCGAGCGCCTGCCGCCCTGTGGAGCAGT  
ACGCAACTTCTTTTCATTAGTGTGTTTCTGGACTAAATCCAGCTTGTTCAGCAAGCTCGCGTGGCTGCG  
TCGAGTGACACAGCAGGTGAAGCTGATGTACCTGTGGGGCATGGTTCGGAGGGACCATGTTGGGGGTGGCG  
CTCTGGCTACTTGGCTACTCCTCTAGGCTGCTGCGGACCTACAACACGAGTCTGCCGTACTTTGAAGAGA  
ATGACCCTCTACTGCGCTGGCTGGGCCAGCAGGAGGCGGCGCCGCTCAGCAACGTACCAACGCGGCGTT  
TGCCGCTCTGCTTGAAGCCAGCATAGGCAAGAGCGGGTAATGGAGAGGCTGGCAAGCTCATTGGCGCCC  
GCGACTCCTCGACAGCGGCAGCGCTATCTGCAAATGACGGAAGAAGGAGTAGAATCGCATTGCTTCGTGG  
ATGATGCTGCGCTAGCGGCAGCGACAAGCGACGCCACAGAAGACGGGCGGTGCAATGGTGAGACAGCCGC  
AGGCGGAACTGACGCGGTGATCATCGGCAAAGGCTGCAGCGGCGGTGGCGATCCAGGAAAGTTGCGTGTG  
GAATCTGGTCCTTCAACCGATAAAGCTTTGGCCGCTGCCTTCGAAGAAGCAGCGGCGGCAGCGTCGGCGA  
CGCGAGATGAAGGAGCCGCTGAGGCTAGCTGCGGCACAACCCGAGGCGGAGGAGAAGGAGGGGGCAGC  
AACCACAGCTTCGCGGATGGCAAAAGAAGGAGAGATCCTAGGAGCTAG

>AY035390 609, 3317 A14

ATGATGCAGGACACTGCTTACCCTTTCCCCACCACCGTACGCCGGCGACGTACCAGGCCGGCTTGCATT  
ATCAGGCCAACGACGCGAAAGCGCGGCGCCGCTGCTTACCTCGTCCGCTGGAAATGCTGCCAACGGTAA  
GCGGCTCAGTCACTGGGGCCGCAACGTTTTGCGTGGCTTTTACCATGTCAAATGGCATCAGCGCACGCAG  
TGTGCCGTTGTAGCGTGTGTTGCTGTGGTTCTTCATCCTTTTTGTGCTCCTGCACACTTTTCTTCAGGTGT  
CGGGTCTGACGCAGTCGATTTATGCGGTTTTCTCGAGGCCGACTTCCGGGCTGCAAACACTCCTGGAGGA  
CGAGCTCGTTATACCTAGCCCTGTTGTGCCACCGAATGGAGCATTTTTGTGGTCTGTGTACAGAGGCCCTC

GTTGTCTTCCGTCCAGCTAGTGCCGCCACATCCCTGGCTACGACGCCTGCCAGACCGAGATGGTAGTGT  
GCGTGGAACGATGGAGGAAGCCTGGTTGTCAGCGAGCGAGTCGGAGCCTCTCAGCACTGTACGAGACTG  
TGTAGCAAGGCTCTATAACCTGGGTCTCCTGCAGCCTCCTCGTACTACCATAACCGCGGTGAATGACACG  
TGTGCAGCAGTGC GCGTGACAGTGCAGGTGCTCTCAGGCGAGTCAGAAGAGGCAGATCGGAACAAGTGCA  
GCAGCGGGTTCGTGGCGGAGCTGCAGATTTTCATCGACAGAACGGGAGAAGGTGGAGGTGCACACTCAGCG  
GTTCCCGTTCGTGGCCGCTCTGCCCTGTCGCCTCACCGGAGGCTATTGATGCTAAGGATGGACACCGAGGT  
GGCAGTGACGGTAATCATTACATCGTGCCCGCTACTTTGCGACAGCAGCTGTTTCGAGACACAGACGCAG  
ACTGCGATGTCCCACCGCCGTGGAGAATTGACACTATCGAGGACCTTGATGAGGTGGTACTGCGTTTCGC  
CGGGGACGCGGCTCAGACCACAGAGACATCGTCGCTGCTGGCGAGTGACCTGCGCTGCCCGACCTACTTC  
CTCACGGCAAACCTTGGCCGCTTTGGCCGCCATCACAATCAGCTGCAGGAGATCTTGAACGGCATCTCGC  
TGGCCAGGAGATCGAACCGCACGTTTATTTTGGCACCTTTGTGCCGGCGCTGTACATGTCGTACTTGAG  
GCTAAATCCAGAGCTTCTGTACGGATGGAATGCGCTACGCGGAAACGGCCACTACTGTGTTCTGTGCTAC  
GCCGAGGCGCGGCAATACTGCGGCTCTGCGTGAGCGCGATGGGGTAGTGAGTATGGAACGGGTCAGTT  
TTGCAGCCACTGCAGACCTGCACGTGCTGTTCAACACCACAGAAGAGCACGACAGTTATGCATGGGGGTG  
CATGCCTCGCGTGCCGGGCACGGATGGCGGCTTTGTGTACGATGCGGATGAATGGTTCTCGATGGGGGTG  
CGGCGAAGGGAGGAGATGACAGCGCACACCGCAAGCAATACCTCATCAGTGCCATCGCCGTAACGTTCC  
ACGAGGCAAGGCCGCTAGTGCGGAGGAGTGTAGCGGCTTCGCCGGCCCCGCTCTGAACAAGAACTCAAC  
GCAGTGGGAAAGGATTCGAGAGTGCACCACTGCGTTTCTGCGCACCTACGGCGATGGTGACGGGAGACGC  
GAGTCGTGCTTAGCCTCACGGCGACAGCCACGCATTGTGGTGATTTTCGAGCGTCACAGCGTTTCATCTGC  
GGCCGACGCTGACGGAAATGACCAGGCTGCTTGGCCTCCTGCGGCCGTACCGACACTCACGGTGGAGAT  
TGGCCGGTACTACCGACTCTATGCGACGCAGCTCCAGTGGCCAGCCAACACCGATCCGAAGCGCTCTTTT  
TCAAACGTGCTGCAGCCATTTGTTACAAGAGCACCATTGGTGTGCACGTACGCCGTCGCGAGTTTACGT  
GTCGCGAGGAGGCCGAGCACCCAGCGCCACCATCATCGCTATGTCGGAGGCGCGCTACCAGTTTGACGG  
CACAGGTA AAAACGATAGCGCCGCTGCTGGGCGCCCCATCACCAACCGTAGCGGACTGGCGAGCGACTGC  
GGATGGAATTCGAGTCGCTACTGCACATCTACGACACCTATGCGAGCTGGATGCGATCGCGACAGGCGC  
AGGGGCTGAGGCGGTGCGTTCGTCGCGATGTGCAGACTTCAAACAAAACAGGTGCTGCGGAGCTACGT  
CGCCTTTGACGAGCAAGTCGGCCCCATTGGCTCTCAGCTGCAAGCTGCACTGCAGCAGCGCTACAACCCA  
CTAAAGAAGAAGCGCGCCCAATGGATATCCACCCATCTATGCCGATTCTACGACCACCGGCCCGCA  
AAGACCTTTTCCAGACTTACCAAGAAATCCTGGCAAGATGGGAGCATTTCATCCGCAGACACGCAACGCGC  
CGACGGGGAAGCCGTCTTCGACGTGCTTCTGTACCGCGACAACGGACAGTCTTGTGAGATGTTGTAC  
CCCATCGCGGAGCAGGAGGCGTGGCCCTGGGGATCGACTTCTTTGTGCTCGGTAACACAGGCGTGTTC  
GCGGCAATATTATTTTCGTCCGTGTCGATCAACGTGTGCTTGGCGCGCTTGGGCAGAGGGCTGCCGTGTCA  
CGGCGTCTCGCTGGGTA CTACGAAATGCTGTACAAGGGTTACATGTGA

>AY064402 293, 1754 SRP54-like protein

ATGGTCTTGGCAGAGCTGGGTG CAGAAAATCGGGCAGGCGATTTCATCGCATGTCCGCCAAGTCGATGCTGG  
GTGAGGACGATGTGAAGGAGCTGATGAACGAGATTGCGCGTGCCTGCTGCAGGCAGACGTGAACGTCAC  
CATTGTGAAGAAGCTTCAGGTGAGCATCAGAACGGAGCTGGCACTAGCGGAGGAGGGCGCTGGACTGAAC  
AAGCGCAAGATCCTTCAGAACGCTGTCTTCAATGGCCTCAAGCGCATACTCGACCCCGGGGTGAAGCCGT  
TCCTACCGGTGAAGGGGAGGCACAACGTGCTGATGTTTGTGGGTCTGCAAGGGTCCGGCAAGACGACATC  
GTGCACGAAGTACGCCGCTACTTTTCAGCGCAAGGGCTTCAAGACGGCGCTGGTGTGCGCCGACACGTTT  
CGCGCTGGCGGTACGATCAGCTGCGTCAGAACCGACCAAGGCCAAGGTACGCTTCTACGGATCACTGA  
CGGAGGCAGACCCGGTAGCGATCGCCAAGGAAGGTGTGGCGGAACTCAAGAAGGAGAAGTACGACCTCAT  
CATCGTAGACACGAGTGGCCGCCATAAGCAGGAGTCGGCGCTCTTCGAGGAGATGAAGCAGGTCGAGGAA  
GCCGTGAAGCCGAACGACATAGTCTTCGTGATGTCCGCGACAGACGGCCAGGCGGTAGAGGAGCAAGCAC  
GCAACTTCAAGGAAATGGTTGCTGTCGGCTCGGTCAATTGTACGAAGCTAGACTGCCAGACCAAGGGCGG

CGGTGCGCTCTCCGCCGTCGCGGGACGCGCAGCCCCATCGTCTTCATCGGCACCGGCGAGCACTTCGAG  
GACTTCGACCTCTTTAATCCGGAGCGGTTTGTGCAGAAGATGTTGGGCATGGGCGACATAGGCGGGCTGA  
TGGACACGATGCGCGACGCCAACATCGACGGCAACGAGGAAGTCTACAAGCGCCTGCAGGACGGCCTGTT  
CACAATGCGTGACATGTACGAACATCTGCAGAACGTGCTCAAGATGGGCTCCGTTGGTAAAATCATGGAA  
ATGCTGCCCCGGCATGTGCGGGCCACGCCGCTACGGCGGGCCAGCAGGGCGACATTGCGCTGAAGGGTTTA  
TCCACATGCTAGACAGCATGACGGTCGCCGAGCTGGATGAAGTCAGGGTGAAGAAGATGATGACACCATC  
CCGCATGCACCGCATGCGCGCGGGCAGCGGCCACTCCGTCGTCGAGGTGCAGAACCTGATTATTAGCTAT  
ACGAAGTTTGAGGAGATCGTGAAGAAGATGGGCAAGATGAACTTCAAGGCCATGATGCAGGACTCTCCG  
GGCCCGCCGCGGGGCACATGGGGCAGCAGCAGATGGGTGAGCTGGCGAAGCTGCTCAACCCGAACATGCT  
ACGGCAGATCGGCGGCATGGGTGACTGCAGGGATGATGAAGCAGCTGCAGCAGAGCATGG

>AY079097 1, 951 class I nuclease

ATGCCTGCGTTTTGTGCGCCTCCGTCTGCCTCTCACAGTGCTGTGCCTCCTGGTACTCAGCTCTGCGCTGT  
GCGTGACTGAGGTTCTCGGATGGGGCTGCGTGGGCCACATGCTCCTCGCCGAGATCGCGCACCGTCAGCT  
GAACGATGAAAACAAGGAAAAGCTTGACGCGATGGCGCACGATTTGCGCAGAGCGGCCCGTTTCGAGTCG  
TCCCCGGACATGGTGCAGGCCGCATGCTGGGCGGATGACGTGAAGCGTTGGGGTCAGTATGCCATGGCCA  
CGTGGCACTTTTTTCGCTACGCCGTACAACCCGAAGACATCAATATCACCGATCCGGTCGCTACAGTCAA  
TGCCGTACCGGTGTCCCGCAATATGTAACATCGCTTCGACGTACGAATGCGCCGCTGCACCTGCTAAAC  
TTCGCTTGGGTGAACCTGGTGCACATCCTTGGCGATCTGCACCAGCCCCTGCACACCATCTCCAGGTACT  
CCTCTGAGTACCCGCACGGAGACAGAGGAGGCAATAAGGTTGAGGTTTCGCGTACGAAAAGAAAGGTGAA  
CCTGCATGCCGCTGGGATAATATTTGCAGTGGCACGCCTCCACGCTACAAGCGGCCCTCTCTTACACC  
GACCTCTTCGCCCTCGCTGCGACAGCGGACCGGCTGCTGGAAACGTACACCTTCCAGAAGCGTTGCGGA  
CACTCGTGACGTGGTGGCGATTACAGAGGAGGCCACATGTTTTCGCGTAAACACCAGCTACCCCGGCGT  
AACACCAGGTGCGACTCTCAGCGATGATTATCTTGTCTGATGCAAGCGTGTGCGTGAAGGCTCGACTGACG  
CTTGGTGGCTACCGCTCGGCTACCTTCTGAATGAGCTGCTGTGAGTATCCCTGTGGACGAGGCCACAC  
TGGAGGCGTACCGCGCTGCACGTTGGAAGTGGAGCGCGTAA

>AY129954 190, 732 signal peptidase type I

ATGCGGGAACACATCAATACCCTACTCTCCCTCCGCGTCCGCGACGTCATCCAGCAGGTCGTCACCGTTG  
GTCTTTTTCTCAGCATCGTCCCTCGTTGGCTGGCGCGCCGTCGCCGTCGGCACGAACTGCGAGGCCAGCAT  
CGTTCGTCGTCGTCGAGCGGCAGCATGGAGCCCGGTTACTACCGCGGCGACGTGCTGCTGCTGCACCACCGG  
CCAGAGTACCCTGTGACGGTGGGCGACATCATCGTCTACACGCTGCCTGGACAAGAAATCCCAATCGTGC  
ATCGCGTCCACCGCATCCACCAGCGCAGCGAGGACGGCAAAAAGTTTTACTTGACCAAGGGTGACAACAA  
CGTGAACGACGACCGCTTCTCTTTCGAAATGGACGGGAGTGGGTGGAGGAGGGGATGATTATTGGCAAG  
ACCTACGCCTATGTGCCGCGCATTGGGTATCTGACAATTATGTTCAATGAGTCCAAGATCATCAAGTACC  
TAGCGCTGGGGCTGATTGGCTTTTTTCTGCTGACCACCACAGATGAGATGTAG

>AY147013 1, 2796 POLIA

ATGCAAAACCAGAGTGCATCCAGCAGCGGGCTCGAAGCAAGCCAACACCACTGAGGCGCGATTGTGCCG  
GCACGAAAGCCGCTGCTGACGCCTCCGGTGGCAAACGAAAGCCGAAGACGAGGAAGCGGGGTGGGGCGGA  
CGCAATCCTCCCCGGTGCCTTGGGCCCTCTGTGTGTGCAACGCCGGCTCCTCGCACGCTTTTCTCTCTG  
GCATCTTCCGAAGCTGGCGGGGTGCGATGGCGGAGCTGCAGGGTGGACCCACCGCGGGCCACGGTCT  
CTGTCCCCTACATCTATCTGCAGGAATCGGCCGAGGAGCTGTTTCAGCGACGTGCACCGTGCCTCAACGA  
CCCGGATCGCATCCAAGCACCACCCCTGTTTGTGCGGCTTTCGGCCCTCAGTAGCAATGTCAACGCGGGC  
GCGGCGCTCGCGAGTGTGGAGTCTCGCACGAACTTTACCTACTACAGCAGCGGCGCCAAGACGGCGAAGC  
GCCGCGTGTGCTGCTGTTTCTCCTCCCTCGACCCCGTGCCTAGCCACCAGCACGTGAGCTTGTCTGAT  
ACGGTGGAAAGACGACATGTACGCGCTGCCGGCACAGACCGTTGGCTTGGCGCTTCTGTGCCGCGTCCCT  
ACAGAGCTACCCGGGTGGAGTCTATTACCTTCAATGCGCAGGTGCTCCTGGTGGCGCTACTCGCTTACT

ACAAGGGCACATTGTGGTCGAACTGTGTCAGCGACGTGCGCGTGATGGCGTGGATGGCTCAGCTGCACGT  
GGCAAGTACTCTGTGCGAAAGCTCCGTCCGCCGTGCGCGCTTGGGCAGGGGAGGCACCGCCGCTGCCGCG  
GACGGGGCGAGTGACGCGGACACGAGTGTGCTCTACGACTACAATCAGCTGCTCTTGACGTTTGTGGCG  
GGAAGCTGCCGCCGACAGTGACAGCTGAAAAGCATGAGCAACGCAGGGTGCTTCTCGCACTCAACGATCAT  
TTTTGCCGAAGGCATCGGGACTGCCGCCGCCGCCGAGCAGCAGCAGCCCCGGCGCCGCCCTGACGTCC  
GCACAGTGCCAGCTAGCTCATCAAGTGTACTACTTGGCCACTGTGTACCGCAGTCTTTACGGTCTGCTGG  
GCAGCAAAGGGCTCCTGCAAGCGTTCCTGCGGCAGGAGAAGCGGATTGCGCTGCTGCTGGCGTTCTCAA  
GTACAATGGCATGCGCGTGGATCTGCATGAGGTTACCGCTACCAGAAGAGCTGCGAGGCGGAGATGGCA  
CGGCAGCGCAACTTGCCAACAAGCTCGTCCCGGAGCTTGGCGAGGACTTCAATATTCAGAGCCACGATC  
AGTGTGCGAAAGCCTCTACGAGGTGCTTCAGCTGGGCAAATACTTGCTTAAATCCGGAAATGGCGAAGA  
CGTCCGTGCCACCGGGCTCACAAACAAAAGGGGGCGGCTGTGACGGCGGAGGACACACTGCGTGCC  
CTCGCCCGGCATCACAAAGTTTCTGCGTGTGTTGCGCTATCGCAAGGTGTGCAAGCTGATGCAGACAT  
ACATCGAAGGGATGATGAGCTACGCCGTGGTGGCTCTAGCGCACAAGCAAGCCCAGCTCCTTGTCTCGG  
CAGCGTTAACGCTGAGACGGGAACTAGTGAGAGCACGAAAGGGCGGCAGCAGGCGCACGGCGATGATGAG  
GGCGCAAGGCCGTGTGCGTGTGTTTACAAGCGAAGCGGTGGACATGAACGACGACAGCCGTTTGTGG  
ATCGCCGGCTTACACGAGCAGCAGCGGATACAGCGCTAGCGGCGCCGAGCCAATGCCAGCACGAAATCA  
ACGGAGCAGCCGCGAGGAGGCAAGTGCAGCAGCGGTGGGCGAGGTCATTCTTCTGCAAGGGGGTACGCC  
ACGCTGCACCCAACTTCTTTCAGGAGGGCACCGACACTGGACGGCTATCCTGCGTTGAGCCGAATCTTC  
AGAATCTTCCACGTAATGGCATCACAGCCGCCGTTGCAGGCAACGACGCCGAGGAGGACGGCGAGGAAGA  
CCTCTTGGGCTTTCGGCGCTGCTTCGTGCGCACTGACGGATGCGTGTCTTGTCCATTGACTACGAACAG  
ATCGAGCTACCGTACTAGCGCACCTGTGCGGCGACCGCGCTCGTAGAAGCGCTGACGACATCGGCAG  
ATATTCACCGGGCGATCGCCGAGGTGGTCTTCAAGAAGAAGCCCGTAAGCACTGAGGAGCGCCGTCTGGC  
CAAGCGCGTTCGATTTGGTTGCTCTACGGCGCCGGCCCAAGACGCTCGCGACGCACATGGGTGTTACG  
GTTGATCGGGCGTTGCACATCACCTCGTTGCTGGCAAACGCCTTCCCCGGTATCGACCGTATCAGCGCC  
GCGTCATCGAGGAAGCCCGCACCAATGGGTTCTGCGCACTCTCAGCGGTGCGCTGAGGTACCTGCCGGA  
CATCCGAGCACAGTGCTCTCGCGACGGTTCGTACGCGGAGCGACAGGCCTTCAACAGCGTCGTGCAGGGC  
AGCGCCGAGACGTGATGAAGATGGCGATGCTTGGCGTGTCAAAGGAGGTGCTGCAGCGCTACGATCGCT  
CCGACGTGTCCCTGCTTTCGAGATCCACGACGAGATGGTCTTTCATGGTGGCAAGGAGCTGTCCCGAT  
GGTGGTGGCGCTGGTATCCTCAGCGATGTCGCACGCCATGCAGTTGCTCGTACCGCTGAGTGTAAAGGGC  
AAGTTTGGCGATTGCTGGGTAACCTGACAGGAGTGGTCCGTGGAGCACGACCTAGGCGTGGTGTAG

>AY155573 241, 1674 pdi

ATGCAGCGCTCATTCTTGTGTTTCTGTGCGCCCTTCTCTTCTGCGTCCGCGAGAGGTGCAGG  
TGGCCACTAAGGACAACCTTGCACAAGTTCGTAATCGGGGATCTCACGTTGGTCAAGTTTTATGCTCCGTG  
GTGCGGCCACTGCAAGACACTCGCCCGGAGTTTGTAAAGGCCGCTGACATGCTGGCCGGCATCGCGACC  
CTTGAGAGGTGATTGCACCAAAGAAGAGAGCCTTGTGAGAAGTACGAAATCAAGGGTTCCCCACGC  
TGTACATCTTCCGTAACGGTGAGAAAGTGAAGATCTACGATGGTCCCCGCACTGCCGCCGGCATCGCGTC  
GTACATGAAGGCGCATGTCGGTCCATCGATGAAGGCCATCTCAACGGCTGAAGAGCTGGAGGAGCTCAAG  
AAGGAGACTTTCCCGTGTGCGTGGTGAAGACAGCGAGCACCAGCTCGGAGATGGCGTCGATGATAACCA  
AGGTGGCGGACTCTCTCCGCTCGCAGATGAACTTTGTGCTCGTACCGGATGCGGCCATCTCTCGAATGA  
TGCCATGGAGTCGGTTACGGTGTATCGCAAGAATGCGGAGCGCGAGGCGTACACCGGCGCTACACCAATG  
ACGGCAGAGTCGGTGAAGAGCTTCTCACGAGTGTGTTGGACTACTTTGGCGAGCTCGGCCAGGAGA  
GCTTTCAGAAGTACATGGAAGCGAACAAGGATAAACCTCTTGGGTGGGTGTTTCATCGACAAGAACACGGA  
TTCTGCGTTGAAGGGGTCCTTGTGGCGGTGGCGGAGAAGTACCGCTCGCAGGTGTTGCTAACCTACATT  
GACGGCGATCAGTACCGCCCGTCTCGCGCCAGCTGGGCATTCTGAGGATGCGAAGTTCCCGGCGTTTG  
TGGTTCGATTTTCGAGCGCCCATCACGTGATGGGGACGGACACCCAGTCACCTCCGAGTCTGTCGCTGC

GTTTGTGGAGAAGTATGTCAAGGGCGAGACGAAGCAGACCGTGATGTCCGACGCGATTCCCGCTAAGGAG  
ACGGTGAACGGCCTCACAAACGGTGGTGGGTGACTTTTGCGAAGTACACGGACGGCACACAAAACGTGA  
TGCTGCTCTTCTACGCGCCGTGGTGGGACACTGCAAGAAGCTGCACCCCGTCTACGATAAAGTAGCCAA  
GAGCTTCGAGTCTGAGAATGTGATCATTGCCAAGATGGATGCCACGACGAACGACTTTGACCGCGAGAAG  
TTTGAGGTGTCTGGATTTCCAACGATTTACTTCATCCCAGCCGGCAAGCCGCCAATCGTGTACGAGGGTG  
GCCGCACCGCAGACGAAATCCAGGTGTTTGTGAAGTCTCACCTGACCGCCTCCGCGCTCCATCTGGCGG  
CCCTTCCGGCAACAGCGAAGAGGAAGATTTGTAG

>AY157268 1, 750 GPI12

ATGCACAGTATCACAGTTGTGTGCATCAGCGTGGTGGCTTGGCGTGCTGCTGCTTCTGTGGATGAAGATAT  
CAAATCTTGGCCGGACGTCCGTTCGCAGTGACGTTCTGTTTGTGTTTGGCACCCTGGATGACGAGGCAAT  
GTTTTTACGCCACTCCTGCATTCGCTGCGGACACAGCGGTACGCGTGCATTTTCTGTGCCTGTCCAAC  
GGCAACTACGCCGGATGGGAAAGGAGCGTGAGAAGGAGCTGTACGCCAGTGGCGCTTCTTTGGGGTGC  
AGCGGGTAACATCCGAGTCGTCGACCACGCCGACTTGCAAGACGGCATGTGTAATATCTGGAGCCCGTT  
GCTTATTCGAGGGAGATCGAGTCGTACATGCAGAAAGCCGGCAACATCAGCACCATTTGTTACATTTGAC  
AAGTACGGTGTCTCTGGTCACTAATCACATCGCCGTTACAATGGCGTGGGGAGCTCAAGGAGAACA  
TGCTCCAGGGATCCTCCACCTGCAGCTCAGAACACGGAGTCTGCTGTGGAAGTACGTTGGACTGCTGGC  
TGTTCTCCCTTATGCCCTGTGGTCACTCACGTCGTTAGTCGCGCCAGCTTTGTGCGCGTCATTCCACCC  
GCATCAGTCTGGGAGAGCATGGCCGCAATGCCAAGCACGCCGGTCAGCTTGTCTGGTTTCGGTATTTGT  
TTGTCATTTTCTTTCGTACACGTACGTGAATGAGATCGAAGAGCTCTAG

>AY168561 1, 822 6-phosphogluconate dehydrogenase

GACATCATAATCGACACTGGTAATGCCAACTTCAAGGACCAGGACAAGCGCGCGGCTCAGTTGGAGAGCC  
AGGGTCTCCGCTTCCCTCGGCATGGGCATCTCTGGTGGTGAGGAGGGTGGCGCAAGGGGCCGGCCTTCTT  
CCCGGGTGGCACACCAAGCGTGTGGGAGGAGGTGGCCCCGATCGTGGAGGGCGGCTGGCGCAAGGCTGAG  
GACGGACGCCCCGTGCGTGACTTTCACGGCAAGGGCGCGCTGGCTCCTGCGTGAAGATGTATCACAAACG  
CTGGGGAGTACGCCGTGCTGCAGATCTGGGGTGGGGGTACAGCGCCCTGCTTGCCTTCGGCTTCGACAA  
CGATCAGATCGCCGACGTATTCGAGTCGTGGAAGGCGGATGGCTTCCCTAAATCCTACATGCTCGACATC  
TCCATTGCCGCTTGCCGAGCGAGGGAGGCAACAGGCAACTATTTGTCAGAGAAGGTCAAGGACCGCATCG  
GCTCCAAGGGCACCGGCTCTGGTCTGCCCAGGAGGCTCTGGGGATTGGTGTGCCAGCGCCCTCGCTCAA  
CATGGCCGTCATCTCACGCCAGATGGCCATGTACAAAGGGGAGCGCATCGCCAACGCAAGGGCTTTCCCT  
AACTTCCCTCGTGGCCCTTCTGAGGAAGCCACGGACAAGTCCCCGAACTCCCCGGAGCGAAGAAGCTGT  
ACCACGCCGTCAGCCTTTGTATCATCGCGAGCTACGCGCAGATGTTCCAGTGCTTGGCGGAGCTGGACAA  
GGTGTATGGATTCGGCCTGAACCTGCCCGCCACGATCGCCACCTTCCGCGCC

>AY185122 27, 182 A2

ATGAAGATCTGCAGCGTGCGTCCGCTTGTGGTGTGCTGGTGTGCGTGGCCGCGATGCTCGCACTCAGCG  
CCTCCGCTGAGCCGCACAAGGCAGCCGTTGACGTCCGAACGCTCTCTGTGGCCTGCAGGCCGTTGACGT  
TGGCCCCGTGTCGTAA

>AY196150\_0 969, 3409 40S ribosomal protein S5A

ATGAGCAGCAAGACTCCCAAGCTCTTCAACAAGTGGTCGTTTCGAGGGCCTCGAGACGTCGGAGCTGGCCC  
TCCGCGACCACATCTCGACGACGGCCGCGTATGTGCCGCACACGTCCGGCCGCTGGCAGAAGCGCCGCTT  
CTACAAGGCCCGCATGCCGATTGTCGAGCGTCTGGCCAACGGCCTGATGTTCAAGGGCCGCGCAACGGT  
CGCAAGCTGCAGGCTGCGCGTCTGCTGAAGCACACACTGGAAATCATCCACCTGCTGACGGACGAGAACC  
CCCTGCAGGTTGTTGTGGACGCCGTGTCGAAGGGGGCGCCGCTGAGGACTCGACCCGCGTCCGCTCCGG  
TGGTGTGTGCGCCGACAGGCTGTGGATGTGTCACCGATGCGCCGCGTGAATGAGGGCATCTACCAGATG  
TGCAAGGGCGCGCTGAGGCTGCCTTCCGCAACCTGAAGTGCATGCCGGAGTGCCTCGCGGACGAGATCG  
TGAACCGCTCCAAGGGTAGCTCGAACTCTACGCCATCAAGAAGAAGGATGAGGTGGAGCGCGTGGCCAA



GGCTAACCGGTAA

>AY196150\_1 2837, 3409 40S ribosomal protein S5B

ATGAGCAGCAAGACTCCCAAGCTCTTCAACAAGTGGTCGTTTCGAGGGCCTCGAGACGTCGGAGCTGGCCC  
TCCGCGACCACATCTCGACGACGGCCGCGTATGTGCCGCACACGTCCGGCCGCTGGCAGAAGCGCCGCTT  
CTACAAGGCCCGCATGCCGATTGTGCGAGCGTCTGGCCAACGGCCTGATGTTCAAGGGCCGCGCAACGGT  
CGCAAGCTGCAGGCTGCGCGTCTGCTGAAGCACACACTGGAAATCATCCACCTGCTGACGGACGAGAACC  
CCCTGCAGGTTGTTGTGGACGCCGTGTGAAGGGGGCGCCGCTGAGGACTCGACCCGCGTCCGGCTCCGG  
TGGTGTGTGCGCCGAGGCTGTGGATGTGTCACCGATGCGCCGCGTGAATGAGGCGATCTACCAGATG  
TGCAAGGGCGCGGTGAGGCTGCCCTCCGCAACCTGAAGTGCATGCCGGAGTGCTCGCGGACGAGATCG  
TGAACGCGTCCAAGGGTAGCTCGAACTCTACGCCATCAAGAAGAAGGATGAGGTGGAGCGCGTGGCCAA  
GGCTAACCGGTAA

>AY197729 1, 402 ribosomal protein L27

ATGAAGTTCTCAAGCCTGGCAAGGTGGTGATCGTGACGTCCGGCCGCTACGCCGGCAAGAAGGCGGTGA  
TTGTGCAGAACACCGATTCCAAGAGCAAAGAGCGTCCCTACGGCCACTCTCTGATCGCCGGCATGAAGAA  
GTACCCGAAGAAGGTTGTCCGCGCATGAGCAAGCGCACCATCCAGCGCCGTTCTCGCGTGGGCGTGTTC  
CTGCGTGTGCGTGAATCACAAGCACTTTCTACCGACGCGGTACAACATGGACTTGTGAGGGAGCTCCGCG  
GCCGCATCAACGTCTCGGATGCGTGAAGAAGGCCAGGTGAAGCAGCTGGTGAGGAAGTTGTTCCAGGC  
TCGCTACAACGCCGGCAGCAACCGCTGTTCTTCCAGCGTCTGCGCTTCTAG

>AY227807\_0 545, 1824 YIP1

ATGCTCAACGAGGTGCACGTGAACGCAGACCCGAACAGCATCTCCACCTTGGATGAGCCGGTGGCTTGAGA  
CGCTGCTGCGCGATGCCAAGGCGATCGGCCGAAGCTCGTCTGTTGTGTGCCCTCTCTAGGAGGTGA  
TAAGGAGCTTCGCGATTGGGATCTCTGGGGGCCGCTGTTCTGTGTCTCATTCTGGCCTCCATCCTCACC  
ATCAACGCCAGCGACGACCAAGGCGCCCGCTTCTCTGCGGTCTTCATCTTTGTGTGGCTTGGCGGTC  
TTGTGCTACCGTCAATGCCAAGCTCCTTGGCAGCAAGATCATGTTCTTCCAAACGTAAGTGCAGGCTG  
CTACTGCTTGGCGCCATCTGTCTCGGCGCTCTCCTGTGCTGCGTCCCTCCGTTGGTGTGTTTATTGAACCTC  
ATGCTGTGCTTATGGCGTGGGCGTGGGCGCTTGGGCGGCTTGGCGTTTTTCCGACACACCGTCCAGCG  
CCGACCGTGAGGTGTTGGTGTGTACCCTGTCCGGCTCTTCTACGTCTTCTTACCTGGATGGTCTGGT  
TGGTATTTAG

>AY227807\_1 1465, 1824 terbinafine resistance locus ORF3

ATGTGCGTCTGTGTGTGTGCTCTCTCCTATCGCTCTGCCGTCTTTGTTTTTTTTTTGTTTGTGTGTG  
CTCGTATCTCTCTCTGTGCAATCCCTGATGACGTGGGACACCTCAGTGGTTCGCTTCGAGGGTGGCCG  
TGATGCCCCCGCCATCGGCACCCATACTGGTCTACCTATGGTGGTTCAGAGGCTCGAGCGCTACGACGTG  
GGGAGGTGAGTGGGATTCATCGCTGCTGATGTCCGTGGTGTCTCGGTGCGACCTGCGACAGCGAGCACAC  
GCTTGTGCCATCCATGTGATGGGCGAAGTGTCCGCTTGAAGCAAGCGTATCCTACCCCGGCCCTCACAC  
TGGTGTGCTGA

>AY230143 264, 2762 SCA1

ATGAGGGGGGACATCACAGCGTCGTTCCGGCCTCACAGCAAGGACCTTCGAAACCCACTCATGTGCCGAGG  
GGCGAAACCAGACGGGTACGCAAGCGACACGGCTGTGCGACGCACATAGAAGGCCCTTTTTTCCCTCGGGC  
TCACCACTGCTGTGCCATACTCGTACGCTGCATACAATTATGTACTTGGCTCAGCACGCTGCACTTCCCTC  
GTCATGGAACCGGACGTAAGCCGTGAGAATGCCGCCGTTTCAGGCAACGAGACGAGCACCAACATATCCT  
CGCCCGGATAAGGCTCCTGACGAATGAGCTCGAGCTGCCACCCATCCGCGTATGGCTGCCGATCACAC  
ATGCGCCATGTGCACGAACGGTGTGGTGTATACTCAAACCTGGCGAAGAGGGCGGTCCCGCTGCGGCGGCG  
AGCAGGCCTGAGAACGTGACTGCTATGGTGTGCCGCAAGGTTTTCAAAGGAGGAGGTGATGTGCTGACAT  
CCGCCGAGGAGTGGTGGCGGGCTGCACCGCTCGGAATGCTGCATGCGGTGCGTCTCGCGAGGAGGA  
CGTGAACGCGTGGTGGTGTGATGGTGGCCGCGATTGTGGGCCGATGAGCGGTGGCAGCGACTCA

TGCCCCGCGTTCCTGGCTGAGATACGCCCGGGGATCGATAAACATGCGAAGTTGCAGGTGTGGTTTCCGC  
GCATGCCGTGCTGGCCGCTGCCGGGGAGCCGCGCGCTGCCGTACGTGGGACTGCCGCTGTGCGTGACAC  
GGACATTGACCGCGACGTTGCGCCGCCGTGTGCGTAGAGATAACGAGCGACGGCAGCACGATCGTGCTA  
CAGTTTGGCCGTGATGCGACGTGACGGTGCCGGAGGCTTTCGAGCTGCGGTGCCCGACGCACTTCTTCT  
CCGTCTTGGTTGGGCGCTGGGGCCGCCAGCACAAACCAGCTGCAGGAGCTCCTGCACAGCCTTGCCTTCGC  
TCGCGCGTCGAACCGCACGTATGTGCTGCCATCCTTTACGCCGATACGAATTTGCCGTATGTGCGCTAC  
AGTGCCTCGAATCTGTACGGGTTCAACGCGATCCGGCGCGAGGGGCAGTACTGCCTCGTCACGAACGCTG  
AGGTGAAGCCGATCTTCGCGCAGCTGCAGGCGATGGGCGTTGTGATGGACATGCGCCGCTGGACTACAT  
GGGCGTCGTGAAACCGCATCTTCCCCCAACAGATGGCGCAGGAGATAGTCCGCCGGTGGTGGGTGCTG  
CCACCGGTGCGCGACGGCGTGCGCAAGTACAACCTCGAGAGCTGGTTTCCGACTCGAGGTCATTCTCGC  
CCCCGCTGCGCTCCGTGGCGGACTACCGCGCTGACTCGGTGCTGTTCCGCGAGTCTGTGGAGCCGCTGAT  
GGGGGATGATTTGTTTCGCACCCCTACTGAGGCTGAGCAGTACAGCAGCTGGGACCGCATCAAGATGTTT  
GCTTCGCGCATGCTTGAGGTGCTTGGCGGCGACCACGTGGGCGACGACGCGCAGGTGGGGCCGCGCAGG  
TGCGGATGGCCGTGATATCCGGCAAGGTGGCGTATTTCTTTACCCGCAACTAGAGGAGGTGACGCGGCT  
GTTCCGGCTGCTGCGCCCGTCCGCACATGTGTCTGCGGAGGTGGATCGTATGTACTCGAAGAGTGGGCA  
GCGCTTGGGTGGCCGACGACTGGTTCGACCAAGGACGCTGACGGGAGCTTGTGATGCGCGACACGCTAC  
GGCTTGCAAACCTCAAGGGCGTATCGGGATTCATGCGCGCCTTCGTGAGCGTACGTGTGCGTCCGAGGC  
CATGCGCCTCTGGGACACAAACCTCGCGCTGACGGTCGACAGGTACACCGTCGACAGCACGGACCCGAAC  
TGGGCTGGCGTGAATCGATGGTGTCAAGCATCGAGAGCGACTGCTCGTGGACTGCGGAGTCTGCGGTGG  
AGCTGTACCTGCAGTACGCGCACTGGCTTAGGTCAACCATGCCGGGCACGTTTGGCCACGATTACGTGCC  
GACGACCTATGTTGCGTACGACGACCAGAGTGGGCCGATGGCAGACGACATGGAGAGGATCATAACAGCTG  
CTTCCCAGAGGAGGTGGTTCGTGAAGGACATCGGCAACCTAACCAGCGCAGTACCCGCGGCGTTTTGTGGCGT  
CGTACGACGGCCGATCAAACTAGTCTTAAAGCTGTTTACAATCGTGGCGGGCGAAGGCGGTAGAACA  
GCTGGAGGTGCACGCAAGCTCGCCGAATTACTACGCGCTGCTGCAGAAGGCTTTGCTGAACATGTTATAC  
GAGCCTGGTTTGGAGGAGATGCAGGCCATGTGCTCGACTACATCGTGTCTACGAACACGGAGGTGTTCC  
GCGGCAACATCATCTCGTCTGTGGCGACGAACGTGATGCTGCGCCGTTGGGGCCGTGGACTCCCCGCTCA  
TGTTTTACTGGCTGGGTACCTCGAGTCTTTTTACACGGGCTTATACTGA

>AY230144 750, 3194 SCG1

ATGCAAGAGGAGAACAATGTGCCAGCGGAGTGGGCTCCCAGGGACACGCACCGCCTCGACCTTCTTCAGC  
TGCTTCCCCCTCTCAGAGGCACTGCGGGCAGAGCAGCGCTGCGGAGAGCGGACAGGGCTGCACTCGCG  
CTCACGCGGCAAGCCGGAGGTGCACTCGACTCGAGCGTGCAGCGGTGGTAAGAGGAGCACCGGCACACTG  
TCGAGAAGCGATGACTGCTTGAATGCCATAGCACAGACCCCCCTGTTCAACTCCTGCCGTATCCTCGAC  
GATCCGCGGCACAATGTCTGCGTTTACACACTCGACAGCGTCTGTCTGGTTGCGCTAGCCGCTTACTTGC  
TCTCATCGTCATGGTTCCTGAGGTCATCAGCCAATTCACGACCAATGTAGGCTCACAACAGAAATCATCG  
ATAGAGTTGCTCAATGAAGCGAACCGTGAATATGAGTCTTCATCGCCGTTCTCTGTCTGCTGGTGCAGCAG  
AGAGTGCTGTTGAGCGGTTGACGACCACACAGCGTGGTCTTGGCGCCTCTGGCGCTGGCTCTCTGGCGAG  
ACTCGACCGGGATCAGCTGCCGTCGTGGACGTTGCGTGTGATCGACGAGGACTGCACGATGTGCTTGGAC  
AATGTACATACGCTTCTGCGTCTGCGGATGCGGGGAGGTGCGACTAACAAAGACGGGACATCATAAGC  
AAAAAGGGCTTTCGGTGTTCGCGACGACATCTGCACCGCTGGGCCTCATGGGGCCGATGCTGTTTGGGAT  
GGCGAGCGTGACGGACGACGTGGACGTTGACGCGGAACTGCCGCGGTGGCAATGGGTGACCTGGTCTGAC  
GCGCAGCAGCGCCGCTTCGTTTACACATCGCAGTGCAGGAGCACAGGTGAGCGACCGCGACACTTGATCG  
TGTTGGGCATACCTTCAACGGACCAACCGATGCGCTACCCTCTGCGGGACGCACAGCGGGCGACGTGGCT  
GACGTACCGAGAGGTTGCACGCACCGAGAACAACCTTACTGGCGCGCTGCTGCAGCTCTACGTGTTTCGCT  
GCTGCGGAGCATGATTCTGAGGACTCGACGCATTCCGCCGTGGACATGGTTTCAGCTGGCCCCGACAGTGA  
GCGAGTACGCCGACGCAACTGAGCAGCACCTGGCTGTGGAGGTTGGAGACGTCAACAATGCACCCCCCTA

CCTGCAGCGTCGCGTGGTGTGCTGCGTGATGGGTGGCGGACATCCCACGAAGCGATGACGCGGTGTGGAGA  
TCACCCTGCGCTGGTGTAAAGGACCACCGTGGTACTGCGGCAAGTCTTGTGGCCGGGACCTCGTCCCTCG  
CGGCTCTTTTCAGCCCAGTTGTCGCTGCCCGTGACACCTGCCTTCACAGCAGCGGGCAGTACGTGTGCCA  
CGCGTCCGCGGCACTGTGGCAGGAGGCGCTGCACCACCGCAACTCGCTATGGCTGGACTTTTTGACGGAC  
CGCAAGCCGACCACGAAAAAGAAAATGGGCATGGGTATATCGTGGGGTATACCGACAGAAAATAGGCATGT  
CTCAAAGACCGTGTGTTGGCTGAACTACGCGTACACTGCCTTCCCGGACGTGCCGTACATCATGAAGGG  
CGACGACGACATGTACCTGAAGGTGCCACAGTACTTGAGCGACCTGCGGCATGTGCGCGGTGGGTGGCAG  
AAGCCGCGCAACTTGACGGTGACGATTCCACACAGAGGGTTATCCCACCGACACTGGCCATCGACGACG  
CGGAGGAATGCCTGTATCGAGTGTGGTGGATCTATAGCAATAAAAATCGCGTATGGCAACGGCGTGGGCTA  
CATTCTGGACCGTCGCCTCATCCAGGCTGCACTGAACCCATTTGATGGCTCCAATGCTCTTCTGATGAAG  
CTGCTGACAAATCCCTACGATTACAGGCTGAAAAGGAATATCTTAGCTTGAACATGCAGCACGAGGATA  
AGCATATCGGGAAGCAGATAAGAGATCACCACGACGCCGTGGAGAGGTTCTGCCCAAGAAGCGCGTGTG  
CTACATGGCTGACCGGCGGTTCCGGGCGCACCAGATTCTGCGGCCAAAGCCTGTCAAGCTGACGTGGATC  
TCGGTGATGGCGCACTTTGGCATGTCAGCGATTCCATACTATGTCCACTACTTCCACAAAAATGAGTTCA  
AGGTGGCCGAGGAGGCGAAGCGGTTGATTGCGCAGGGCATCGACGTGAACACGATTGAGGAGAATGCAAC  
GCAGCGGATGCACGAGTGGGTGGCGTCTCAGGTGCCGAGCACACTCGTGGGGCTCGGAGCGTCATTGAT  
CTCGACTGGGTACGTGGAGACCCACGCACTGCGTACACTGTAGCCGAGGAGGACGAAGTCGCGGTATACG  
ATGTTCCGTACAAGCTCCGCCAAGGAACGATATCCCCTGTGTCTTGGAGTCTGATAAGAGGTAG

>AY230145\_0 385, 4959 divergent H4 histone

ATGGCCAAGGGCAACCAGAGGCGCCAGAAGAAGGTGCTGCCGACAACATCCGCGGCATCACTCGCGGCGG  
CGTGAAGCGCATCTCGAGCGAGGTGTACGAAGAGGTGCGCCGCGTGTGAAGGCCTACGTGGAGGACATT  
GTGCGCTGCAGCACGGCCTACACCGAGTACGCGCGCAAGAAGACCGTGACGGCGTGCGATGTTGTGACCG  
CGCTGCGCAAGCAAGGCCACATCCTGTACGGCTACGCGTAA

>AY230145\_1 2515, 4959 SCG2

ATGCGAGAGGAGAACAATGTGCCAGCGAGTGGGCTCCCAGGGACACGCACCGCCTCGACCCTCTTCAGC  
TGCTTCCCCCTCTCAGAGGCACTGCGGGCAGAGCAGCGCTGCGGAGAGCGGAGAGGGCTGTCACTCGCG  
CTCACGCGGCAAGCCGGAGGTGCACTCGACTCGAGCGTGCAGCGGTGGTAAGAGGAGCACCGGCACACTG  
CCGAGAAGCGATGACTGCTTGAATGCCGTAGCACAGACCCCCCTGTTCAACTCCTGCGGTCATCCTCGAC  
GATCCGCGGCACAATGTCTGCGTTTATGCACTCGACAGCGTCTGTGCTGCGCTAGCCGTCTTACTTGC  
TCTCATCGTCATGGTTCCTGCGTATCAGCCAATTCACGACCAATGTAGGCTTACAACAGAAAATCATCG  
ATAGAGTTGCTCAATGAAGCGAACCGTGAATATGAGTCTTCATCGCCGTTCTCTGTCTGCTGGTGCAGCAG  
AGAGTGCTGTTGAGCGGTTGACGACCACACAGCGTGGTCTTGCGGCCTCTGGCGCTGGCTCTCTGGCGAG  
ACTCGACCGGGATCAGCTGCCGTGATGGACGTTACGTGTGATCGACGAGGACTGCACGATGTGCTTCGAC  
AATGTACATAACGCTTCTGCGGTGCTGCGGATGCGGGGAGATCGACTAACAAGACGGGACATCATAAGC  
AAAAAGGGCTTTCCGTGTTCCGCGACGACATCTGCACCGCTGGGCCTCATGGGGCCGATGCTGTTTGGGAT  
GGCGAGCGTGACGGACGACGTGGACGTTGAGCGGAACTGCCGCGGTGGCAATGGGTGACCTGGTTCGTAC  
GCGCAGCAGCGCCGCTTCGTTACACATCGCAGTCGCGCAGCACAGGTGAGCGACCGAGACACTTGATCG  
TGTTGGGCATACCTTCAACGGACCAACCGATGCGCTACCCTCTGCGGGACGCACAGCGGGGACGTGGCT  
GACGTACCGAGAGGTTGCACGCACCGAGAACAACCTTTACTGGCGCGCTGCTGCAGCTCTACGTGTTGCT  
GCTGCACACCGAGATTCTGACTACACAGCGCAGTACCTCGGGGACACGGCGCAGGTGGCCCCGACAGTGA  
GCGAGTACGCCGAGCAACTGAGCAGCACTTGGCTGTGGAGGGTGGAGACGTCAACAATGCACCCCCCTA  
CCTGCAGTGTGCGGTGGTGTGCTGCGTGATGGGTGGCGGACATCCCACGAAGCGATGACGCGGTGTGGAGA  
TCACCCTGCGCTGGTGTAAAGGACCACCGTGGTACTGCGGCAAGTCTTGTGGCCGGGACCTCGTCCCTCA  
CGGTCTTTTCAGCCCAGTTGTCGCTGCCCGTGACACCTGCCTTCACAGCAGCGGGCAGTACGTGTGCCA  
CGCGTCCGCGGCACTGTGGCAGGAGGCGCTGCACCATCGCAACTCGCTATGGCTGGACTTTTTGACGGAC

CGCAAGCCGACCACGAAAAAGAAAATGGGCATGGGTATATCGTGGGGTATACCGACGGAAGTAGGCATGT  
CTCAAAAGACCGTGTGGTGGCTGAACTACGCGTACACTGCCTTCCCGACGTGCCGTACATCATGAAGGG  
CGACGACGACATGTACCTGAAGGTGCCACAGTACTTGAGCGACCTGCGGCATGTGCGCGGTGGTGGCAG  
AAGCCGCGCAACTTGACGGTGACGATTCACACAGAGGGTTATCCCACCGACACTGGCCATCAACGACG  
CGGAGGAATGCCTGTATCGAGTGTGGTGGCTCTATAGAAGTAAACTCGCGTATGGCAACGGCGTGGGCTA  
CATTCTGGACCGTCGCCTCATCCAGGCTGCACTGAACCCGTTTGGATGACTTCAATGCTCTTCTGATGAAG  
CTGCTGACAAAATCCCTACGATTACAGGCTGAAAAGGAATATCTTAGCTTGAACATGCAGCACGAGGATA  
AGCATATCGGGAAGCAGATAAGAGATCACCACGACGCCGTGGAGAGGTTCTGCCCCAAGAAGCGCGTGTG  
CTACATGGCTGACCGGCGGTTCCGGGGCGCACCAGATTCTGCGGCCAAAGCCTGTCAAGCTGACGTGGATC  
TCGGTGATGGCGCACTTTGGCATGTCAGCGATTCCATACTATGTCCACTACTTCCACAAAAATGAGTTCA  
AGGTGGCCGAGGAGGCCAAGCGGTTGATTGCGCAGGGCATCGACGTGAACACGATTGAGGAGAATGCAAC  
GCAGCGAATGCACGAGTGGGTGGCGTCTCAGGTGCCGAGCACACTCGTGGGGCTCGGAGCGTCATTGAT  
CTCGACTGGGTACGCGGAGACCCACGCACTGCGTACACTGTAGCCGAGGAGGACGAAGTCGCGGTATACG  
ATGTTCCGTACAAGCTCCGCCGAAGGAACGATATCGCGTGTGTCTTGGAGTCTGATAAGAGGTAG  
>AY230146 303, 2747 SCG3  
ATGCAAGAGGAGAACAATGTGCCAGCGGAGTGGGCTCCCAGGGACACGCACCGCCTCGACCCTCTTCAGC  
TGCTTCCCTCCTCTCAGAGGCACTGCGGGCGGAGCAGCGCTGCGGGGAGCGGACAGGGCTGTCACTCGCG  
CTCACGCGGAAGCCGGAGGTGCACTCGACTCGAGCGTGCAGCGGTGGTAAGAGGGGCGCCGGCACACTG  
CCGAGAAGCGATGACTGCTTGAATGACGTAGCACGACCCCCCTGTTCAAGTTTTGCGGTCATCCTTGGC  
GACCCGCGGCACACTGTCTGTGTTTACACACTCGACAGCGTCTGTCTGGTTGCGCTAGCCGTCTTACTTGC  
TCTCATCGTCATGGTTCACTGGGTCATCATCGAATTTACGACCAATATAGACGCACAACAGAAACCATCG  
ATAGAGCTGCTCAATGAAGCGGACCGTGAATATGAGTCTTCATCGCCGTTCTCTGTCTGCTGGTGCAGCAG  
AGAGTGCTGTTGAGCGGTTGACGACCACACAGCGTGGTCTTGGCGCCTCTGGCGCTGGCTCTCTGGCGAG  
ACTCGAGCAGGATCAGCTGCCGTGCGTGGACGTTGCGTGTGATCGACGAAGACTGCACGATGTGCTTCGAC  
AATGTACATACGCTTCTGCGGTGCTGCGGATGCGGGGAGATCGACTAACAAGACGGGACATCATAAGC  
AAAAAGGGCTTTCCGTGTTGCGGACGACATCTGCACCGCTGGGCCTCATGGGGCCGATGCTGTTTGGGAT  
GGCGAGCGTGACGGACGACGTTGACGCGGAACTGCCGCGGTGGCAATGGGTGACCTGGTTCGTAC  
GCGCAGCAGCGCCGCTTCGTTACGCATCGCAGTCGCGCAGCACAGGTGAGCGACCGCGACACTTGTATCG  
TGGTGGGCATACCTTCAACGGACCGGATGCGCTACCCTCTGCGGGACGCGCAGCGGGCGACGTTGGCT  
GACGTACCGAGAGGTTGCACGCACCGAGAACAATTTACTGGCGCGTGTGCTGCAGCTCTACGTGTTGCT  
GCTGCGGAGCATGATTCTGAGGACTCGACGATTCACCGTGGACATGGTTTCACTGGCCCCGACAGTGA  
GCGAGTACGCCGACGAACTGAGCAGCACCTGGCTGTGGAGGTTGGAGACGTCAACAATGCACCCCCCTA  
CCTGCAGTGTGCGGTGGTGTGCGTGTGGTGGCGGACATCCCACGAAGCGATGACGCGGTGTGGAGA  
TCACCCTGCGCTGGTGTAAAGGACCACCGTGGTACTGCGGCAAGTCTTGTGGCCGGGACCTCGTCCCTCA  
CGGCTCTTTAGCCAGTTGTGCTGCCCCTGACACCTGCCTTACAGCAGCGGCGCAGTACGTGTGCCA  
CGCGTCCGCGCACTGTGGCAGGAGGCGCTGCACCACCGCAACTTGTATGGCTGGACTTTTTGACGGAC  
CGCAAGCCGACCACCGAAAAAGCAAATGGGCATGCGTATGTGCTGGGGTATACCGACGGAAGTAGGCATGT  
CTCAAAAGACCGTGTATGGCTGAACTACGCGTACACTGCCTTCCCGACGTGCCGTACATCATGAAGGG  
CGACGACGACATGTACCTGAAGGTGCCACAGTACTTGAGCGACCTGCGGCATGTGCGCGGTGGTGGCAG  
AAGCCGCGCAACTTGACGGTGACGATTCACACAGAGGGTTATCCCACCGACACTGGCCATCGACGACG  
CGGAGGAATGCCTGTATCGAGTGTGGTGGCTCTATAGAAGTAAACTCGCGTATGGCAACGGCGCGGGCTA  
TGCACTAGACCGTCTCATCCAGGCTGCACTGAACCCGTTTGGATGGCTCCAATGCTCTTCTGATGAAG  
CTGCTGACAAAATCCCTACGATTACAGGCTGAAAAGGAATATCTTAGCTTGAACATGCAGCACGAGGATA  
AGCATATCGGGACGCAGATAAGAGATCACCACGACGCCGTGGAGAGGTTCTGCCCCAAGAAGCGCGTGTG  
CTACATGGCTGACCGGCGGTTCCGGGGCGCACCAGATTCTGCGGCCAACGCCTGTCAAGCTGACGTGGATC

TCGGTGATGGCGCACTTTGGCATGTCAGCGATTCCATACTATGTCCACTACTTCCACAAAAATGAGTTCA  
AGGTGGCCGAGGAGGCCAAGCGGTTGATTGCGCAGGGCATCGACGTGAACACGATTGAGGAGAATGCAAC  
GCAGCGGATGCACGAGTGGTGGCGTCTCAGGTGCCGAGCACACTCGTGGGGCTCGGAGCGTCATTCGAT  
CTCGACTGGGTACGCGGAGACCCACGCACTGCGTACACTGTAGCCGAGGGGGACGAAGTCGCGGTATACG  
ATGTTCCGGTACAAGTTCGCGCAAGGGACGATGTGCGGTGTGTCTTGGAGTCTGGTAAGAGGTAG

>AY230147 218, 2758 SCG4

ATGCAGCCAAGCGTGTGCTTGTGCCACTTTGCCGGCCACCTGCACACCTTAGGCACTCCTTCCGCCACCC  
CCGCACTGCGCGGAAGTACACCATCATGCGAGAGGAGAACAATGTGCCAGCGGAGTGGGCTCCAGGGA  
CACGCACCGCCTCGACCCTCTTCAGCTGCTTCCCCCTCTCAGAGGCACTGCGGGCAGAGCAGCGTGGC  
GAGAGCGGAGAGGGCTGTCACTCGCGCTCACGCGCAAGCCGGAGGTGCACTCGACTCGAGCGTCGAGCG  
GTGGTAAGAGGAGCACCGGCACACTGCCGAGAAGCGATGACTGCTTGAATGCCGTAGCACGGACCCCT  
GTTCAACTCCTGCGGTATCCTCGACGATCCGCGGCACAATGTCTGCGTTTATGCACTCGACAGCGTGTCT  
CTGGCTGCGCTAGCCGTCTTACTTGCTCTCATCGTCATGGTTCACTGGGTATCAGCCAATTCACGACCA  
ATGTAGGCTTACAACAGAAATCATCGATAGAGTTGCTCAATGAAGCGAACCGTGAATATGAGTCTTCATC  
GCCGTTCTCTGTCTGCTGTCAGCACGAGCGTGTGTTGAGCGGTTGACGACCGCACAGCGTGGTCTTGCG  
GCCTCTGGCGCTGGCTCTGCGGAGACTCGACCGGATCAGCTGCCGTGCGTGGACGTTGCGTGTGATCG  
ACGAGGACTGCACGATGTGCTTGCACAATGTACATACGCTTCTGCGGTGCGTGGGATGCGGGGAGATC  
GACTAACAAGACGGGACATCATAAGCAAAAAGGGCTTCCGTGTTGCGGACGACATCTGCACCGCTGGGC  
CTCATGGGGCCGATGCTGTTGCGATGGCGAGCGTGACGGACGACGTGGACGTTGCAGCGGAACTGCCGC  
GGTGGCAATGGGTGACCTGGTCTGACGCGCAGCAGCGCCGCTTCGTTACGCATCGCAGTCGCGGAGCAC  
AGGTGAGCGACCGCGACACTTGATCGTGTGGGCATACCTTCAACGGACCAACCGATGCGCTACCCTCTG  
CGGGACGCGCAGCGGGCGACGTGGCTGACGTACCGAGAGGTTGCACGCACCGAGAACAACCTTACTGGCG  
CGCTGCTGCAGCTCTACGTGTTGCTGCTGCGGAGCATGATTCTGAGGACTCGACGCATTCCGCCGTGGA  
CATGGTTTACGCTGGCCCCGACAGTGAGCGAGTACGCCGACGCAACTGAGCAGCACCTGGCTGTGGAGGCT  
GGAGACGTCAACAATGCACCCCTACCTGCAGCGTGCCTGGTGTGCTGCGTGATGGGTGGCGGACATCC  
CACGAAGTGATGACCGGTGTGGAGATCACCTGCGCTGGTGTAAAGACCACCGTGGTGACTGCGGCAAG  
TCTTGTGGCCGGACCTCGTCCCTCGCGGCTCTTTCAGCCCAGTTGTGCGTGGCCGTCACCTGCCTTC  
ACAGCAGCGGCGCAGTACGTGTGCCATGTGTCCGCGCACTGTGGCAGGAGGCGCTGCACCACCGCAACT  
CGCTATGGCTGGACTTTTTGACGGACCGCAAGCCGACCACGAAAAAGAAAATGGGCATGAGTATATCGTG  
GGGTATACCGACGGAAGTAGGCATGTCTCAAAGACCGTGTATGGCTGAACTACCGTACTGCCTTC  
CCGGACGTGCCGTACATCATGAAGGGCGACGACGACATGTACCTGAAGGTGCCACAGTACTTGAGCGACC  
TGCGGCATGTGCGCGGTGGTGGCAGAAGCCGCGCAACTTGACGGTGACGATTCCACACAGAGGGTTAT  
CCCACCGACACTGGCCATCGACGACGCGGAGGAATGCCTGTATCGAGTGTGGTGGACCTATAGCAAAAA  
ATCGCGTATGGCAACGGCGTGGGCTACATTCTGGACCGTGCCTCATCCAGGCTGCACTGAACCCGTTTG  
ATGGCTTCAATGCTCTTCTGATGAAGCTGCTGACAAATCCCTACGATTACAGGCTGGAAAAGGAATATCT  
TAGCTTGAACATGCAGTACGAGGATATGCATATCGGAAGCAGATAAGAGATCACCACGACGCCGTGGAG  
AGGTTCTGCCCCAAGAAGCGCGTGTGCTACATGGCTGACCGCGGTTCCGGGCGCACAGATTCTGCGGC  
CAAAGCCTGTCAAGCTGACGTGGATCTCGGTGATGGCGCACTTTGGCATGCCAGCGATTCCATACTATGT  
CCACTACTTCCACAAAAATGAGTTCAAGGTGGCCGAGGAGGCGAAGCGGTTGATTGCGCAGGGCATCGAC  
GCCAAGACGATTGAGGAGAATGCAACGCAGCGGATGCACGAGTGGGTGGCGTCTCAGGTGCCGAGCACAC  
TCGTGGGGCTCGGAGCGTATTCCATCTCGACTGGGTACGCGGAGACCCACACACGGCGTACACTGTAGC  
CGAGGAGGACGAAGTCGCGGTATACGATGTTCCGTACAAGCTCCGCCGAAGGAACGATGTGCGGTGTGTC  
TTGGAGTCTGGTAAGAGGTAG

>AY230148 210, 2660 SCG5

ATGCAGAGGAGAACAATGTGCCAGCGGAGTGGGCTCCAGGGACACGCACCGCCTCGACCCTCTTCAGC

TGCTTCCCCCTCTCAGAGGCACTGCGGGCAGAGCAGCGCTGCGGAGAACGGAGAGGGCTGTCACTCGCG  
CTCACGCGGCAAGCCGGAGGTGCACTCGACTCGAGCGTTCGAGCGGTGGTAAGAGGAGCACCGGCACACTG  
CCGAGAAGCGATGACTGCTTGAATGCCGTAGCACAGACCCCCCTGTTCAACTCCTGCGGTCATCCTCGAC  
GATCCGCGGCACAATGTCTGTGTTTACACACTCGACAGCGTCGTCTAGTTGTGCTAGCCGTCTTACTTGC  
TCTCATCGTCATCGTTCACTGGGTATCATCGAATTTACGACCAATATAGACGCACAACAGAAAATCATCG  
ATAGAGTTGCTCAATGAAGCGAACCGTGAATATGAGTCTTCATCGCCGTTCTCTGTCTGGTGCAGCAGC  
AGAGTGCTGTTGAGCGGTTGACGACCGCACAGCGTGGTCTTGCGGCCTCTGGCGCTGGCTCTCTGGCGAG  
ACTCGACCGGGATCAGCTGCCGTCGTGGACGTTGCGTGTGATCGACGAGGACTGCACGATGTGCTTCGAC  
AATGTACATACGCTTCTGCGGTGCTGCGGATGCGGGGAGATCGACTAACAAAGACGGGACATCATAAGC  
AAAAAGGGCTTTCCGTGTTCCGCGACGACATCTGCACCGCTGGGCCTCATGGGGCCGATGCTGTTTGGGAT  
GGCGAGCGTGACGGACGACGTGGACGTTGACGCGAACTGCCGCGGTGGCAATGGGTGACCTGGTTCGTAC  
GCGCAGCAGCGCCGCTTCGTTACGCATCGCAGTCGCGCAGCACAGGTGAGCGACCGCGACACTTGATCG  
TGGTGGGCATACCTTCAACGGACCAGCCGATGCGCTACCCTCTGCGGGACGCGCAGCGGGCGACGTGGCT  
GACGTACCGAGAGGTTGCACGCACCGAGAACAACCTTACTGGCGCGCTGCTGCAGCTCTACGTGTTCCGCT  
GCTGCGGAGCATGATTCTGAGGACTCGACGCATTCCGCCGTGGACATGGTTCAGCTGGCCCCGACAGTGA  
GCGAGTACGCCGAGCAACTGAGCAGCACCTGGCTGTGGAGGTGGAGACGTCAACAATGCACCCCCCTA  
CCTGCAGCGTCGCGTGGTGTGCTGCGTGTGAGTGGGTGGCGGACATCCCACGAAGCGATGACGCGGTGTGGAGA  
TCACCCTGCGCTGGTGTAAAGACCACCGTGGTACTGCGGCAAGTCTTGTGGCCGGGACCTCGTCCCTCG  
CGGCTCTTTCAGCCAGTTGTGCGTGCCCGTGACACCTGCCTTACAGCAGCGGGCAGTACGTGTGCCA  
CGCGTCCGCGGCACTGTGGCAGGAGCGCTGCACCACCGCAACTCGCTATGGCTGGACTTTTGGACGGAC  
CGCAAGCCGACCACGAAAAAGAAAATGGGCATGAGTATATCGTGGGGTATACCGACGGAAGTAGGCATGT  
CTCAAAAGACCGTGTTATGGCTGAACTACGCGTACACTGCCTTCCCGGACGTGCCGTACATCATGAAGGG  
CGACGACGACACGTACCTGAAGGTGCCACAGTACTTGAGCGACCTGCGGCATGTGCGCGGTGGGTGGCAG  
AAGCCGCGCAACTTGACGGCGACCCTTCCACACAGAGGGGTTGTTCCACCGACGCTGGCCATCGACGATG  
CGGAGGAATGCCTGTATCGAGTGTGGTGGTGGTACGACAATCACAACGTTGTATTTGGCCACGGTCTCGG  
CTATGCACTAGACCGTCTCATCAAGGCTGTACTGAACCCGTTTCGATATCACCAACCAACGTTTGTCTG  
ATGCTATTAACGGTGCCGTACACCCTCGTGTATCACGGTCACTTACTTGAGCTTGCTCATGCAGTACGAGG  
ACCTTTTTCGTGGGACGGCAATTGCAAAGTCTTTCTGCTAGGGTGAAGGAAGTTTGCATGAAGCGCCACT  
GCGCTACGTATCGGACAGAGAGCCGCGTTCGCTGCAGGTTCTCCGACCCGCGCCCTCCAGTCAGACCTGG  
ACATGGAGCTCGGTACTGATGCACTATGCTATGCCGGAGATTCTTATTTTATCCACTACTACTTCAAGC  
ACGAGTTCAAGGTAGCCGAGGCGGCTAAAGGTGCGCTTGCAGGGGATCAACGCCAGCGCCATCGATGC  
GAATGCGACAAAGAAAATGAAGGAATGGGTAGCGTCGCAAGTGCCAACCGTGTGACGGGTCTGAAAAGG  
GTGAAGAATGTACGCTGGGTGCGCGGAGCCCCACGCACCGCGTACGTTGTAGCTGAGGGCGACGGTGTG  
CGGTGTACGATATTGCGTACAGGCGTGCAAAACGATGCTGATCGAATGTGCCATCGAGTCTGAAAAGTA  
G

>AY230149 282, 2726 SCG6

ATGCGAGAGGAGAACAATGTGCCAGCGAGTGGGCTCCAGGGACACGCACCGCCTCGACCCTCTTCAGC  
TGCTTCCCCCTCTCAGAGGCACTGCGGGCAGAGCAGCGCTGCGGAGAGCGGACAGGGCTGTCACTCGCC  
CTCACGCGGCAAGCCGGAGGTGCACTCGACTCGAGTGTTCGAGCGGTGGTAAGAGGAGCACCGGCACACTG  
TCGAGAAGCGATGACTGCTTGAATGCCGACGACGACCCCCCTGTTCAACTCCTGCGGTCATCCTCGAC  
GATCCGCGGCACACTGTCTGTGTTTACACACTCGACAGCGTCGTCTAGTTGCGCTAGACGTCTTACTTGC  
TCTCATCGTCATGGTTCACTGGGTATCATCGAATTTACGACCAATATAGACGCACAACAGAAAATCATCG  
ATAGAGTTGCTCAATGAAGCGAACCGTGAATATGAGTCTTCATCGCCGTTCTCTGTCTGGTGCAGCAGC  
AGAGTGCTGTTGAGCGGTTGACGACCGCACAGCGTGGTCTTGCGGCCTCTGGCGCTGGCTCTCTGGCGAG  
ACTCGACCGGGATCAGCTGCCGTCGTGGACGTTGCGTGTGATCGACGAGGACTGCACGATGTGCTTGGAC

AATGTCACATACGCTTCTGCGGTCGCTGCGGATGCGGGGAGGTCGACTAACAAGACGGGACATCATAAGC  
AAAAAGGGCTTTCCGTGTTTCGCGACGACATCTGCACCGCTGGGCCTCATGGGGCCGATGCTGTTTGGGAT  
GGCGAGCGTGACGGACGACGTGGACGTTGCAGCGGAACTGCCGCGGTGGCAATGGGTGACCTGGTCGTAC  
GCGCAGCAGCGCCGCTTCGTTACACATCGCAGTCGCGGAGCACAGGTGAGCGACCGCGACACTTGATCG  
TGTTGGGCATACCTTCAACGGACCAACCGATGCGCTACCCTCTGCGGGACGCACAGCGGGCGACGTGGCT  
GACGTACCGAGAGGTTGCACGCACCGAGAACAACCTTTACTGGCGCGCTGCTGCAGCTCTACGTGTTTCGCT  
GCTGCACACCGAGATTCTGACTACACAGCGCAGTACCTCGGGGACACGGCGCAGGTGGCCCCGACAGTGA  
TCGAGTACGCCGACGAACTGAGCAGCACCTGGCTGTGGAGGCTGGAGACGTGATAATGCACCCCCCTA  
CCTGCAGCGTCGTGTTGGTGTGCGTGTGGTGGCGCGACATCCCACGAAGCGATGACGCGGTGTGGAGA  
TCACCCTGCGCTGGTGTAAAGACCACCGTGGTACTGCGGCAAGTCTTGTGGCCGGGACCTCGTCCCTCA  
CGGCTCTTTCAGCCAGTTGTCGCTGCCCGTGACACCTGCCTTACAGCAGCGGCGCAGTACGTGTGCCA  
CGCGTCCGCGGCACTGTGGCAGGAGGCACTGCACCACCGCAACTCGCTATGGCTGGACTTTTTGACGGAC  
CGCAAGCCGACCACGAAAAAGAAAATGGGCATGAGTATATCGTGGGGTATACCGACGGAAGTAGGCATGT  
CTCAAAGACCGTGTGTTGGTGAACCTACGCGTACACTGCCTTCCCGGACGTGCCGTACATCATGAAGGG  
CGACGACGACATGTACCTGAAGGTGCCACAGTACTTGAGCGACCTGCGGCATGTGCGCGGTGGTGGCAG  
AAGCCGCGCAACTTGACGGCGACCTTCCACACAGAGGGTTATCCCACCGACACTGGCCATCGACGACG  
CGGAGGAATGCCTGTATCGAGTGTGGTGGATCTATAGCAATAAAAATCGCGTATGGCAACGGCGTGGGCTA  
CATTCTGGACCGTCGCCTCATCCAGGCTGCACTGAACCCGTTTGTGGCTCCAATGCTCTTCTGATGAAG  
CTGCTGACAAATCCCTACGATTACAGGCTGAAAAGGAATATCTTAGCTTGAACATGCAGTACGAGGATA  
TGCATATCGGGAAGCAGATAAGAGATCACCACGACGCCGTGGAGAGGTTCTGCCCAAGAAGCGCGTGTG  
CTACATGGCTGACGGGCGGTTCCGGGCGCACAGATTCTGCGGCAACGCCTGTCAAGCTGACGTGGATC  
TCGGTGATGGCGCACTTTGGCATGTGACGATTCCATACTATGTCCACTACTTCCACAAAAATGAGTTCA  
AGGTGGCCGAGGAGGCGAAGCGGTTGATTGCGCAGGGCATCGACGTGAACACGATTGAGGAGAATGCAAC  
GCAGCGGATGCACGAGTGGGTGGCGTCTCAGGTGCCGAGCACACTCGTGGGGCTCGGAGCGTCATTCCAT  
CTCAACTGGGTACGCGGAGGCCACGCACGGCGTACACTGTAGCCGAGGAGGACGAAGTCGCGGTATACG  
ATGTTCCGTACAAGCTCCGCCGAAGGAACGATGTGCGGTGTGCTTTGGAGTCTGGTAAGAGGTAG

>AY235572 742, 2520 LPG1L

ATGAAGGGCAGACTACACCCCGCCGCGCTGGCCTGCGTTACGAGAAGCGCCATCGACGACCAATTCTTC  
TAGGCGGTGCGTGCGTGTAGGTTACCTTGTGCTCGGCCTCTTCGTGCTGCCTCACGCCCTCCTTAAGCGA  
CGTAACACAGCCACGGTTTCGATGGCGCCAGTGCCGCCCTCGTCGCTGTGCGCTCGATCGACTGAGCAT  
GCAACATCAGGGGCGCAAGCTTCACTCTCCCTTACCAGCGCCCTCCTGGCACTCTTACTTCTATCA  
CTACCGCGGCACCGCTACCGCGTCCCGCTGTAGACGAGAGGAGCAATGCCGCGCATGCCACGGGAGAGGC  
CCCAACGGGTCCACGCACTCCATCTCCGACGCTCCACAACCCACGGAGGTACCACAGCGCGGCGCAGAC  
GAGTTGCACAGCCGATACGTATCAGAGCTCGCGCAACTCGACGTCTCGATGTCTTTCCGCTCCGCCCTC  
ACGAGCGCCGAATCTCGTTTATCGAGTTGCGCGCTGTCTTGGCGCCGTCCTCCTCGTCAGCCCCGAGAC  
GGGAGTAGAGGTGGAGCGGGACGACCTCGCTCCGACCGGTACGCGCCGTTTCTCATCTCCGTCACCTGTG  
GAGAACACACAGGATCTCAAGGCGCTCATCTGCAACTTGACGATGCCCTACCGCTACATCGTACTCGCCC  
AAAATGGCGACACGCCAGAGGTGACGCCGTTTTTCCGCTGCTGCGCCGATGTTGCGCTTACGACGCG  
GCTGACGGTTCTCCAGTTCCCCGAAAACATCGGCTTCCCGGCGCCGTCATGCGCGTCTGCGTGGAGCC  
CTCAGACACCCGTTACGCGAGGTGCCCTTTCTCCACATTGTGCACAACGACGTGCGCTTCTTGTCTCGT  
CCCTTGAACAGGCTGTGGCAGGCGCCTACAAGACGACGGCGAGGGACACGGATATGATCGAAGCTCTGGA  
GAAGGAGGTTGCGACAGAGCCGAACGAGTACACACCGCTGATCCGGCAGCCCGACGGCTTGGCACGCCG  
CTTCTGCCGGGTACCCGCTGCCCCAGCAACATGACCGCAAGCCGTTGTGCTCACGTGCGCGCTGTTGC  
CGGACCGTGTTCGGTACATGGCCCCGTCCAGGCGCGCGGAGCTGATGGTGGGGCACACTTCCCTTCATGTT  
CGCCAACAGCCGCGGCGAGTACACGAGCGTCTTTCTTTCTCGCTGGCTGTGCTGGCGGTTGGCTTCTTT

GACGAGAATTTCTTTCTATCCTTTACGACGACACGGACTACCGCTGGCGTGCCACCTGCTCGGCTTCG  
TTGAAGACCGCAACGCTGCTATGAACGACCAGGTCATCTCCTTCGACCTCGACTGCGTCAACCAAGCCAT  
GAACGACGTCGACGACGATGGCAATGCAGAGGGTCGATTGGGGGGCTTCGCAAGGCAGCTACGGGGCCG  
ACGCTGTCCCTGAAAGGCAAGGCCCTTCAACGTGACTGCCGCAAGGCCTTCTATGCCGGGTGCAGTACA  
CGTATATGCAGCAGAAGTGGGGCGTGGAGTCCATGACGGAACCTCATGCAGGGCGCATAACAAGGCGGGAGCC  
CTTTAGCGGGCAGGCGTTCGGCGGTAAACTGCGCCTGCCGCTGGATGCGTGGGTGGTGGATAGGAACCGG  
CTGACCAACCTGCGGACGTGGCTGCGCGACGTGGGGCGGCGCATCCTTGATGTGGACAACCTATAAACA  
CTGACGTTATTCTGCAGGCTGTCAGCCCTTAA

>AY235573 562, 1944 LPG1R

ATGAAGCGCGGGCAGAGGTCGCACGCTCGCGGTTTTTCTCCTGCGCGGGATGCCTGCTGTTTCGTAGCCT  
GTGTGTTACTCGTAGCCAGCATCACGCTTCTTATCCTGTACTCGCTGCCTGACGCGGCGGTGGGAGCAAT  
AGACGGGGTAAGGAGGTTTGGGTACAGCACCCCTCGGACCAGCCAGTAACAGATGAGGAGCTGTTTCGCT  
TGCACTCTCAGATGGCTGCAGACAGACGGTGTTCGGGCCGACACCGTCATCCCGTTCGTGATTGTGCCGC  
TGCACTGGAGTGGGAAGATTTCCGCATGTTTATGTGCCGCTGCACGCGCGCGCGCTACCTCTACAT  
CCTGCAGAATGGCTCAGTGGAGGAGTACTGCGCTGCTGACGAAGCTGCGCGCTGCGGTGCCGTCCGAG  
CGGCTCATCATCGAGCACCGACCGCAAAACATCGGCTACGCTGCGGCTGTCAACGAAGGGTACCGGGTGG  
CCCTGCAGAAGCCGCATGCCGAGGTGCCCTTATCGGCGTGTTCAACTGCGACGTGTACTTTGAGCGCCG  
GTATTTTGGCCGTACATCCCGTGTGTACAAAATGCTGGCCCTGACGCGGCCCGCATTCGTGCGCTG  
GAGGAAGTGGTGGAAACAGGAGGAGCGGGCGCGCGCGGCGGCGGCGGCGGCGGCGGCGGCGGCGGCGG  
CAACCACACCCGGTCTTTCCATCTCCATGCTCCTGCCGACCGGATTAGATACAGCTCCTTTGCAGAGCA  
GCAGGACGAGTTCAAGGGCATGTAGGCATGTTTTACTACGAGACCAAGTCCATGTGCGCCTTTCTGGTG  
TCGCGCCTCGCGCTGCTGGTTCGGCGGCTTCCCTCGATGAAAACCTTCTACCCCGCCTACTTTGAGGACTACG  
ACTGGCAGTTCCGCCTGGCGAACCTTGGCTTCAAGACGTTTACGGGCTCCTCAGCGCAGTTTGGCGGCTT  
TTTCCACAGAATGGGTGGCAACATCCGCGTCATCAACAAGGGCCCCGCGGCAAGTCCATAAGCTACGAC  
ATGGCGGGCATAACGGGTGGAACGTATGCTTAAACGCCAAGCCGGGCATCGACTACGGGGAGACGAAGTGGG  
CGTGGCATCGCGAGGCGCTTGTGGCAATGAGCGCGACGCCCTTCCCGCAGCTGGGGTTCATTGTTCCGTT  
GGATGTGTGGGTGCTGGATGCGGCGCGGCATCAACTGATCATCGACATCGGCACGGGGCGTCCGGCCATCC  
GTGGAGATGTGCAACACGTACAACGTCTCTCCTTTGAGTCTGCGGCGATTTGCACTGGCGGACGGCA  
AGGACTTCTGGGGAAGCGGCATTATTACAACAGAGCCGGATTGGCGAAAAGTAG

>AY235574 1, 1617 SPT2

ATGATTCACGATGCTGTGCAAGCGGCGTCCACGCCAATGAGCGAGGGCGGCTGAAGCGCGAGATTGCCT  
TGCAAGAGGCGTCTGATGTAGTGGACAACAAGTCGCGGGTACTCCCCAAGTCCCCGGCCGACACAAGGGA  
GAGAACGCACGAGGTGGTCGCCGCCACGGAGCTGTTGCAACATCCCATCTCTCTGCGCTCCAAGGTGTCG  
GCCTACGTCACCCCTCGCCCTGCTCTTCTTATTCGCGCGCTTGCCTGAGAGCTATCGCCAGTTCTTCCCGA  
ACGATGAGAGCCATGTGCGCCCCGGTACGCCCCCATCGTGAAGGACTTCGATCACTACTGGAACCGCCG  
CTTTTACCGCCGCTCCGCGACTGCTTCATGCGCCCCATCGACTCTCGCCCTTCGCGTGTGATTGGAGTG  
ATGGAGCGCGTGTGCAAGGACAACAACCAACGTTTCGAGTACAGCGGTGCGATCGTGCCCGCGGTGAACA  
TGGGCTCGTACAACCTTGGGTTCCCGGAGGACACGCAGAGCATCACGCACGAGGTCTAGATTTCGAT  
CGACGACTACGGCCTCGCCTCATGTAGCGCGCCGAGGGGTTGGGCCAGAGCGCCCTCGTGTCTCGCCTC  
GAGCACGAGTTCCCGAGTTCCTCGGAAAGGAGGATGCCATCGTGTGCGGCATGGGCTTCGCCACGAACT  
TCCGCGGCTCCCCACCTCTTCGGCAAGGAAACGCTGGTGTCTCTGACAGCCTCAACCACTCCTCGCT  
TGTCAACGGCGTGGTTCGTCTGGCGCAAAGGTCAAAGTCTTCCAGCACAACCACTTTGGTCAGGTGGAG  
AAGTGCCTGCGCGAGGGCGTAGTGCTCGGCCAGGACCCATGCGGCGAGTACAAGCCGTACAAGCGCATCG  
TCATCATCATTGAGGGCATCTACAGCATGGAGGGCGAGATCGTCAACCTCAAGAAGTTTCGTGGAGCTGAA  
GAAGAAGTACAAGGCTCTGCTCTTCGTGGACGAGGCGCACTCCATTGGCGCTATTGGCCGCACTGGTCCG



GGTGTGTGCGAGCACACCGGCGTCGACCCCAATGACGTTGACGTGCTCATGGGTACCTTCACGAAGAGCT  
TCGGCTCCATCGGGCGCTACATCGCAGCCGACAAGACGCTCGTTTCGCTACCTCCGCCAGCATAGTTCTAT  
TGCCCTGCACTGCGATCCTCTGGCACCGCCGTGTGCGCAGCAGGTGCTGTCCGGTGTGCACGTGCTGCTC  
GGTAAGGACGGTACGGACCTCGGGGAGAAGCGCATCCGTGAGCTCAAAGATAACTCGTCATTTTTTCGTC  
GCGGGCTGATGGACCTAGGCCTCGTGGTGTGCTCGGCATGACAGCAGCCCGGTGGTGCCTGATGTGCTA  
CAGTATCGGCAGGCTTAGCGCCCTCTCCCGCCTGTGCCTGGAGCGCGGTGTGCTATCGTCATCGTCGGC  
TACCCGGCGACGCCCTCCTGCAGGGCCGCGTGCCTTTTTGCGTCTCGGCCTGCCACACGCGGAGGACC  
TGCAGCGCACCCCTTGATGTGATAAGGGAGCTCAAGGGCTACGTCTGCATGGAAGACAGCACGAACCCGCT  
GCGGTAA

>AY235575 1, 1467 SPT1

ATGTCGTCTCTATCGGAAACGCTGTCAGAGCCGCTGATGAGCCGCCCGTTCCACCGTGCTCTGGAGCTTT  
TCGTTGCCGCCGCACTGGCGTATTTTCTGCTGCAGCGCTTCCACCGCCGCGGGAGGGGAAGCCGCCAAA  
TCCGATGAGCAGGCTGTCCGCTGAGGAGCAGGAACGTCGCATTGCCGCTTTCAGTCGATTCCGTTCCGT  
GCCGAGTGCTCGGTGACGTCGAACGTGCCCGTCCGGAGTACCACGGGCTGACCGAGGTGGTCGGACCGG  
AGGGGAGCCACATCACCATTGTGCGGCCCGGCTCATCGGAGGCGGAGGAGTGCCTAGACCTTGCCACCTA  
CGACTTTCACTCGTTCTCCACGCTGCCGGAGTTCGTTGAAGTTGCGCGGGCGGCCGTGAACGCCTACGGC  
GTGGGCAGTTGCGGGCCTCGCAGCTTTTACGGCACCATCAAGCCGCATCTTGTGGTGGAGCAGGACCTGG  
CCAAGTTTCTCAAGACGGATGACGCGTGTGTACAGCTTCGCATATGCCACCGTGGCCACCCTCATTTT  
CTGCTTTTCCGGCCGCGGCGACTACCTCGTGTACGACGACGGCGTCAGCTCCTCCGTGATGGAGGGCTGC  
ATGCTTTTCTCGTTCTGACATTTCGGCCGTACAAGCACTGCAGCATGACGAGTCTGGAGGAGCGGCTCCAGG  
AAGTGGTGGCGAAGGACGGGTACAGCAAGCCTCACCGCCGCTTCGTGTAACGGAGGGCCTCTTCTCAGA  
TACCGGCGACATCTGCCCGTGCCTCAGATCTTGGGGCTGTGCCACAAGTACCGATTCCGCCTCTTGCTG  
GAGGACAGCTACGGCTTTGGCGTGCTGGGCAAGTACAGGCGCGGAACCTCCTGAGCAGTTCGACATCCCGA  
CGATGGACGTGGACGTGTACATTGGGAGCCTGAGCACGTCTATGGGTGCGGTTGGCGGTTTCTGCGCTGG  
CGCGTCCGCGCATGATTGATCATCAGCGCCTCACCTCCACCGGTACGTGTTCTCGGGCTCGCTGCCCCC  
TACATCACGGCTTCCGTCTCGCAGTCACTCGCGGTGCTGGCGCGTGATGACACGTTTGTGGCCAAGCTGC  
GGAAACACACGAAGCGCATGCGCAGACACCTCCGTGAGGCCGGGTTCAATGCTGAGAAGATCAAGCTGGT  
GGACAGCATCGACGACGCTCACCGGTGATTCTTCTTGGCGTGGAGCGGGCGTACGTCGAACCGGAGGGG  
CTGGAAAAGGTGGAGAGCCGTCTCCAGCGGTTCATCAATGCCCTGCAGAAGAAGAAAGTGGCGGTCTGTC  
GAAACGTCTTCAACAAGATGAGCCGGTGAACAACGTCTCGGACTGCGTATTGTGGCCAAGAGTCTGGC  
GACGGAGGCCGAGGTGACGGCGGCGCTCGAGGCAATCGAGACTGCCGTGAAGGCCGAGTTTTCTGCTAG

>AY251609 1813, 7236 pentamidine resistance protein

ATGAGCAGCCAGCGACCGGAGATGTCAGAAGGGCCAGCGAGTTATAGCGCCCACTCGTTCGGCGAGGTCA  
ACCGACGGCTGTGGCGGTTGCCTACTAAGTCCGTACCGAAGGGCAGCGGTTGTGATGATGCTGTGCTGGA  
CTGGGCTGCGGTACGCGAGTTGCTGGAGGAGGCTCCGGAGGAGCGGAGCGGCGTTTTGTGCGGTTACCTG  
CTGATGTGGCTGAACCCGTATGTGACGCTTTCGTGGAGGGAGCGGCTGGAGGAGGCTTACATGCCTCCAC  
CGCAGCGTGCACACCGCGCCGTGTGCTGTGGCGCTCTGTTGAGCCGCGGTTTTCTGACGAGGAGTTTTG  
CGGGGGCCGTGACGCGTGGCGTGCAGCGGTTGAAGCTGCGCTGCCAGTGTGTTGGCGACTGCGCTGAC  
CGCGCTAGTGAATGTGAAGTGGGTGGCAGCGATTGTACGGGCGATGGGGTGGCGCGCGGTGGCGGCTG  
TGAACGAGCTGTACGTTGGGTTGCGTGGTGGAGGGGTGTCCACGGACGGCTGCGGTGGGTGGGGTA  
CGTTTCGATCGAGCGACGACCGCAGACGCTTTTTGTGCGGTGTGGAGTGGGATGCTGACAGTGCCTGCCG  
TTGTATCGTGCCTGTTGCTGGTGTGCGGCCGGAAGTGGTGCACGATGGGTGCGTGCACGGCGAGC  
GTCTGTTTTACCAGTTTACGAGGGGGCGGCGCGGTGCACGTGCGAGTACGTGGAGGATCTGGTGCCGCT  
ATCGGCGATTCCAACCGCGGATACCGGGTGCAGCGTACGCCTCACACTCCGTGCGTCTTGGGCGGCTG  
CTCCGCACGTTTTCTGCTCCGATCTGATGGCGATACTGCCACCGTCGATTGCGGGTATGATGTGCGAAGTGT

TGACACCGTGGTTGCTGCAGCAGTTTGTGCTGTTCCCTGCAGTCAACAAGGATCAGGAGGGAGTGCGAAA  
AGGGCTGCTCTTCTTCTTGATGTTTGGCATCGTGAAGTTTGTACAGCCAGCGTTTGTGAACAAGGAGATG  
CACCGCAGTCGGCGTGTTCGAGCCTTTTCCGCACCTCGACGCTTGCCCTGATCTTTGAAAAGTGTCTGA  
TGATATCGCCAGATGCGCTGTCGCGGCCGGACATGAGCACAGGTGCGGTGTTAGCGATGGCGAGCTCGGA  
TGTTGAGAACATCAAGGAATTTCCCACGCAAGTGACGTTCCCTGTGGAAGGCACCGACTATGCTGACGTTT  
TACGTTGCCTACCTCTTCGTTCTCGTGGGGCCGAGTGCCGTGGCTGCTGTCTGGTTTTTGCCGCTTAC  
TGCCATATAAAGGGGGCTAACGAATGCCATAGGTGGCGCACAAAGCGAGCCTGTGAGCTGCACGGATCA  
GCGCCTGCGTCGGACGAATGAGCTGCTTTCCGGCATCCGTATCGTGAAGATGATGGGATGGGATTCGAAG  
TTTGTCTCGGCGATCGAAGATAGCGCACGGGCCGATGAGTTGCGGTTCCGACGAAGACTGCAGATGTGCC  
AGGTGCGGTTGTGGGCATGCGTGTCTACTCCGACGTTTCATGATCGCCGCTGTTCTACTACCTACAC  
CCTCAGCGGACACAAGCTTGACGCATCCGTGGTGTTCCTCTCATTGCAGTTGTCAGTGCTATAACCTTC  
CCTGTAATGATGCTCCCGGAGGCCTTTACGTCGCTGGCGAAGTTTCATTGTGTGACGGGGCGCGTACGCG  
AGTTCTTGGAGTGCAGACTCGCACATTATCGTCGAGCACGCGGAGCGCATGTTACAGCAGCACAGGGAG  
TGCTGCCGAGTGCCGTTTCGGCCGACCTGGCAAGGGTGTGTTGTGTCAGTGCCCGCCGCGCTTCCCGTGA  
CGAGCCCGACACGTTGGGGCTGCGCCGCGTGGCGCAGAGGATGCTGTGTGCGGTGCTGCGCCGCGCGTG  
CCGGTGGAGCTGCAGTGGCGGAGGGCGGCTGCCTCACCTGCCACGGGTGAAGGCGGTAGGAAGCCTGTGC  
GCGCTGCTGTGGGGCAGATGATGGCGGTGCGGCTGTTGCGGGTGGTGAGGACGGGCGCGGACGATGAGG  
TGGCGTGGCGCTGTACGCGATGGTGGACAGGACTCTCCTGCACGATGTGCGCGTGTGTTCCCGCGCGCG  
CAGTTGACGGTGGTGGTTGGCGGACGGGGAGCGGGAAGTCTGCGCTGCTGGCGACGCTTTTGGGTGCGT  
TCCGGCTCGAGGGGCATGTGGATGTAGCGAGGTCGGTGGCGTACGTGCCGCAGCAGCCGTGGATTATGCA  
GGAAACGTTAGAGGGCAACATCACGTTCTTCGAGGGCGATCGGCGCCGCGCGGCTGGTGGCGTGGCGGAC  
GATAGTGATAGCGGCTCTGCGCAGGCGTTCTCACCTCTGAGGTGCGCTGAGCAAGCTGCTGGTGTGCTGCTG  
CTGTGTACGGTGTCTCGGCTGCGGCTGTGGCACGGTGAAGGAGCGTCTTGGCGCGCTGTGCGGAGTTG  
CCAGCTGGATGCTGATGTGGCGCTGATGGCGCGGGCTGGGGACAGAGATCGGCGAGTGTGGCATCAAC  
CTGAGCGGTGGGCAGAAGGCGCGCTGAGCCTTGGCGCGCCGTGTATGCGGACCGCGACGCTGTACCTGC  
TGGACGATCCACTGTGCGGCTGGACGTGCACGTTGGGCGACGCGTATGGACGAGGTTGTGCTGCGCGC  
GCTGGCGGGCAAGACGCGGCTGCTAGCGACGCACCAGCTGCAGGTGCTGCCGCACGCGGACCAGGTGGTG  
GTGATGCGGAGGGCTGCGCCGTGTTTGGCGGAAGCTACGCCGCGTACGCTGCGTGGAGTGAAGACGT  
ACGTAGAGAGCGATGAGGCCGCGCCGCAAGCAAGAAGAGCGGGTGTGGCGGTGGTGTGCTGTGGCGGA  
GTGCACCGAGGTCAGTTCTGCGTGGTCTGCTGCGGTGAGCGTGGAGTCTGTGGGGGCACGCGTGAAGGAG  
TGTGACTTCGTTGGTGTAGCCGTGCCGATGTCCGTGTCAGGAAAGGCGACGGTGAATGGGAGGAGAACA  
ATGGCAGGACTTTGTGAGAATGCACTGGCAGGGCTCACGGCCAGCGAGAACTCAGAGGCGGAAGAATG  
CAACGACGGGGACTCTACGGTATGTAAGGTTTGGCCTCGCCAGGTCTAAGGCCGCGCCGCGCACGGCG  
AAGGGCTCATCTGGGCTCGCTACGGATGAGGACGCAGCGGACGCGCGGACCTGATGATTGCGGAGGAGA  
AGGAGACAGGGCACACACCGTGGAGTGTGTACCGCGCCTACGTTGAGGCGGGCGGGGGCGTGCCTGCGC  
AATTCAAGTTGTGCTGCGCTACTTCTTTAGCGAAGTGTCTCTGACAGGCTCCAGCGTTTGGCTGACGCTG  
TGGTCAGTGAACACTTTGGTTCTCTCTACCAACGAACAGCTTGGTGTGTATCTTGGACTCGTCTTTG  
CGGTTGCTGTACAGTTTCTGCCAACGACCTGTTTATTTTTAGTTTCGCTCGCCGCGCTGCCTGCCGCTT  
GCACGCCATGCTCCTGTACACAGTGAGCTCAGCCACGCTGGCATTTTTTGACCGCACACCGCTGGGTGCG  
ATTGTCAACCGGCTTAGCAGGGACGTGCACGTCCTTGACGATGAGCTGCCGGCAACGTGATTCCTTTTT  
TGGGCATTGCGGGATACGTCATGACGCTTTTAGCAGTGACGCTATACAGTACCGCTTAGTGTGGTCTG  
GGTGTGCTAGCGGCTTACGCTTTTGTGCGCCTGCTGAGGTTCTACGCGACAGTGGTGGTGGAGGTGCGG  
CGGCGCAGCAGTGTGGGGCAGTCTCCGCTGCTCTCGCTCCTGGAGGAGGTGCTGCACGGGCGTGGACGA  
TCGCGGCATACGACAAGTCCGACGCTGCTGTTGCGGAGGGCGCTGCTGCGGCTGGACCTTGTGTACAGCTG  
CACGTACGTGGAGAAGGTTGTGACATTGTGGCTCGCTATCCGAATCGAGTCCATTGCGGCATTGGTCATT

ATTGCTGTGGGTCTGATCGGCGTTGTGGAGAAGCTCGTAGAGGCGTCGCCGGCGATGCCGGAGGCGCGTG  
TGGGCCTGATCTCGCTGAGTCTCACCATGTGCCTCGATCTCAGCTGGTTCGCTATCTGCACTCCTAGACCT  
CGCTGCCGTTGTTCGAGGCCAGCATGAACAGTGTGCAGCGCGTTTGCCACTACATTGACTGCGTACCGCAG  
GAAGCGGTGCTCCTGGAGCCGCGGGACGCGTATGTGGCGCGCGCTTTGGCAGCGACTGGCGGCAGCGGCA  
GAGGAGGAGGCGGGAGCACCAAGTGCAGCGACATCGTTGTGGTTGCCGGCGGTGGTGACGACGAGGC  
CGCGCTGCGTGGCAGGGTGTTCGGCAAGGAGCGCGCCGGCGGTGCGTTTGGAGCGCTTGTGCTGGAG  
CACGTGGACCTGCGGTACCGGCCTGGGCTGCCGCTGGTTCTGCGCGATGTGTGCTTCCGCGATCGCCCCTG  
GGCAGAAGGTGGGTGTTGTGGGGCGACGGGGAGCGGAAATCGACGCTGATGCTGGCCTTCTGCGGCT  
GGTGGAGGTGAGCGGCGCCGCATGCTCGTCTGCGGGCGGACGCGCGGACGTACACACTTCCCGCACTG  
CGGCGGCTGTTTTCCATGATCCCGCAGGATCCCGTGTCTGATGGCACGATCCGCAGCAACGTGGATC  
CGTTCCGGCAGCGACGAGGAGGTGCGTCCCGCGCTGGTGTCTGTGGGGTTTGTGGGGGTAGGCGG  
CAGCTCAGCTACCTTCCGACAGCTGCTGGATTGCCGAGCGCTGCATCTGCCAGCATGTTTGCACCTGGAC  
ACTGTGGTGCAGGGGGCGGGTCAACTTCAGCGTTGGGCAGCGCCAGCTGCTGTGCCTAGCGCGCGCGC  
TGCTGAAGAAGGGGAGTGCATTCATTTTGATGGACGAGGCGACAGCGAACGTGGACGCACAACCTGGACCA  
GACAGTGCAGCGTATTGTGGCGGAGCAGTTTGGCGCGTACACGGTGGTGACGATCGCGCACCGTCTGTAC  
ACGGTGGCGGCGTACGACGTTGTGCTTGTGATGGCGCGCGGGCGTGTGGTGGAGATGGGGCAGCCGCGGG  
CGCTGCTGGAGCGTCCGACTCCGTGTTCTACGGTATGGTGGCGCAGAGTGCAGCGGTGGCTGGTTCCCG  
TGAGGGCTTGTCCGGGAGGATGCCGAGGGTGGCGCCAGTGGTGGCGGTTCCGCTGGCGTCACTGACGGA  
GGCGCTGAGCTGAGCGGCGAGGGCGCAACACGGCGTGGAGGCCGCGGTCCGCTCGCTCATGCGTCAGT  
GCAAGTGAAGTGCATCTCTGCAAGTCTTCATT

>AY255810 29, 184 A2

ATGAAGATCTGCAGCGTGGTCCGCTTGTGCTGTTGCTGGTGTGCGTCGCCGGATGCTCGCACTCAGCG  
CCTCCGCTGAGCCGCACAAGGCAGCCGTTGACGTCGGAACGCTCTCTGTGGCCTGCAGGCCGTTGACGT  
TGGCCCCGGTGTCTGAA

>AY273788 2552, 3913 AAAHL

ATGCTGCTGCGCAGTCGTTTGTTCCTAGAGGCTGGCATGGCTGCTGCCGCCGCCACCCTGAAGGCCAGT  
ACGCCTCCCCTGGGAGCAACATCAAGGGCGCCGACAAGAAGACGCGGTGCCGCACGTCCCTGCAGGTGTC  
CCTCTCCACTGATAAGCCTGGCGAGCTGTGTCACCTGCTGAGCGTCTTCAAACCGTACAGCATCAACATC  
AGCCAGGTCCGCAACCGTCCCTCGCGGCTACGAAAACAAGGCGCCGCTGCGCACCATCTTCCCTCGACGTGG  
ACGCTTACATTGAGGACGAAAGCATGAAGAAGGTCATGGCGGAGCTGCACGCGAAATTTCCGAATGTAGT  
CGTAACCGGATCGTGGGTGATTCCGTGGTATCCGACGAGCCCAAAGACCTCGACGAACTCGATCAGAGC  
ACGCTCGCTGCCGGGAGGAGCTACAAGAAGACCCGAGAACCCCCACCCCGGCTTCCACGACGAGGTCT  
ACCGCGCCCGCCGCGAGATTGTCCGGCTTGCCAAGAACTACAAAACCTGGAGATCCGATCCCGATTGT  
AAACTACACAGAAGAGGAGAACCGTGTGTGGACGGTGGTCTACGACCACCTGACCCGCTGTACCCGACG  
CACGCGTGCCAGCAGTACAACCTACGTCTTCCCGCTGCTCCTCGAAAACGGTGTGCTGAGCCGCACCAAAA  
CGCCACAGCTGCGCGATGTGAGCGAGTTCCTGAACGAGGCGACGGGCTTACGGTGCGCCCGGTGACGGG  
GCTGTTGACGTCCGCGACTTCTGAACGCACTGGCGTTCGCGTCTTTTACAGCACCCAGTACATTCCG  
CACGCGGCGCAGCCATTGTACACGCGGAGCCGACATGGTTACAGACATCATTGGTCACTGCCCTGC  
TCTCTGATCCCGACTTCGCCAACTTACCCAGACGATCGGCCTCGCCTCCCTTGGCGCCAGCGATGAGCT  
GTTGGACAAGCTGGCAAAGTCTACTGGTATAGCGTCGAGTTCCGGCTCTGCAGCGAGGGCGGCCCGCC  
AAGGCCTACGGTGTGGTATTTTATCAAGCTGTGGCGAGCTAGAGTACGCACTGAGCGACAAGCCGGAGT  
GCGTCCCGTGGGACCCACAATGGCGTCCAAAACGCCGTTCCCATCACCAAGTACCAACCGCTGTACTT  
TGTGGCCGAAAGCTTCTCAGATGCGCAGCGTAAGCTGGAGGCGTGGCTCAGCTCGCAGGAGAAGCCGCTG  
TACACCGTCTACAACCTCGTACTCGCGGCGCGTGCAGTCGTACCCGAAGAATACGTGGAACATGCTCCAGG  
AGCAGATGAAGCGAACAACCTTACCTTCTAA

>AY27807 545, 1114 *Leishmania major* terbinafine resistance locus, partial sequence

ATGCTCAACGAGGTGCACGTGAACGCAGACCCGAACAGCATCTCCACCTTGGATGAGCCGGTGCTTGAGA  
CGCTGCTGCGCGATGCCAAGGCGATCGGCCGCAAGCTCGTCGTGGTTGTGTGCCCTCTCTAGGAGGTGA  
TAAGGAGCTTCGCGATTGGGATCTCTGGGGGCCGCTGTTCTGTGTCTCATTCTGGCCTCCATCCTCACC  
ATCAACGCCAGCGACGACCAAGGCGCCGCTTCTCTGCGGTCTTCATCTTTGTGTGGCTTGGCGGTC  
TTGTCTGACCGTCAATGCCAAGCTCCTTGGCAGCAAGATCATGTTCTTCCAAACGTACTGCGCCATGGG  
CTACTGCTTGGCGCCATCTGTCTCGGCGCTCTCCTGTGCTGCGTCCTTCCGTGGTTTTTATTGAACCTC  
ATGCTGTGCTTCATGGCGTGGGCGTGGGCCTGTTGGGCGGCCTTGGCGTTTTTCCGACACACCGTCAGCG  
CCGACCGTGAGGTGTTGGTTGTGTACCCTGTCGGGCTCTTCTACGTCTTCTTACCTGGATGGTTCTGGT  
TGGTATTTAG

>AY328521 1178, 3043 ADS1

ATGCCCCTGACGAGGCGCAGGCGCCACCCAGACGGAGGTGTATGATCGCCTCAAGTGAATGGGTGGG  
GTGTGCGAGGATGTCCAGATGCAGATCGACGACGAGAACCCGCTCTGGGTACGCCACGTGGATGGCAAGCC  
GATCAAAAACCTTGCTTGAGTTCCTCTACCAGGAGATCAGCGGCGGAGTAGGTCCAAAGGAGATCCCGCCG  
CTGTGCGCCGAGCATCCCGCTAGAGAAGGCACTTGCGAACTTAACAAGGCGAACATCAACGAGGCCTTCA  
TGAAGGACATCTCCGCGGTGCTGGAGAAGAGCCAAATTGCGCCTGACGGCAAGAGTCGTCTGTGCCACAT  
TGCGGGCAAAAACCTACCGGACCTGTGGCGTGTGCGCAAGGGCATGGTCGAACACGCTCCAGACTGCATT  
CTGCTGCCGAATAGCCACAAGGACTGTGTCGAGATTATGAGGCTGGCGCACAAGCACAACGTGGTCGTTA  
TTCCTTTTTGGTGGCGGCACCAACGTGACGGGTGGCGTCGAGGCAGACCCCTTCGAGCGCGCCCGCATGAT  
CATCTCCGTGGACATGCGCCGATGAACCGCATGATATCGATTGACCGGAGTCGCGTCTGGCCACCTTT  
GAAACCGGTGTGCTTGGCCCTGACCTGGATGCGCAGTTGTTCCGCCACGGCTTCATGTTGGGCCACGACC  
CCGACAGCTACATCTACTCAACCCTCGGCGGATGGATTGGTGCACGCGGCAGCGGGGCCATGTGCAACCA  
GTACGGCGACATTGAAGACATGGTGGTGGCGGTGAAGGTGGCAACCGGACAGGCATCATCGAAACCCCA  
ACCACGTCCCGCACGTGCGGCTGGACCTGAACGGGCTCTTCATCGGCTCCGAAGGCTCCTTCGGCATCA  
TTACGGAGGCCACCATCAAGCTGGAAACCATCCCGGAGACGAAGCTATACGAAGGGTACCTGTTCCCCAC  
CTTCGAGGCTGGTTTTAGCGCCTTCTACACATGCACCGCCAAAGGAATCCATCCGTGCACGATGCGCCTG  
TACGACGAGGACGACTTTCGTATGAGTATGGCGATGAGCACCACCAAGCACAGCTTCTTCCAGCGCTTGG  
TGAGTATGGGTGTCAAGTCCCTTCCTTGAGAGATACCGCGGCTGGAACCTGCGCCGCATAAGCCTAGTGAT  
CGTCGGCTTTGAGGGAACCGCGGATCGCGTCAAGTTCAGCGAAGCGAGACGGCTGCAGTCTTCAAGCAG  
TACGGTGGCGTGGTGTGCGCCGACGCGGGTGTACGTGGCAGGATAAGAAGTACGACCTGCCGTACA  
TACGTGACTTCGCCCTGTCTCTCTCGCACTGGGCGGACGTCTTCGAGACGAGCGTTCTCTACTCGCAGGC  
GATCCCGTGTGCGGTGCAGTGAAGGCCGCTGTGCGGCAGGTGTGGAAGGAACACGGGCACCGCGCTGG  
ATTGGCTGTACACGCGCCACCAGTACAAGTACGGCTGCTGCCTCTACTTCACCTTCGCAAGCGCGCAAA  
AGGACGACATGGACATGAAGATATTCCTCGCCATCAAGAAGCGTGCACGAGGCGATGCTGGCGCACAC  
TGGAAACCTCACCCACCACCGCATCGGCTATGAGCACGTGCCGTGGATGAGCCGCTACATGGGGCCT  
GATGCGCTGGACCTCCTCTTTGCTGTGAAGCAGAAAGTGGACCCAAAGAACATCTGTAACCCTGAAAAGT  
TGCTGCCGTGCCTCCACGGGAGAACGAGAGCGCCGACGCTGAAGGCACGCCAGCAGAGGGAGCTGAT  
GTTGCAACAAGATGGGCGTGCCAGGAGCCGTGCGGTGCGCATATTTAA

>AY364408 1, 792 soluble inorganic pyrophosphatase

ATGCTGAGTCGAGCGTTGAGACCCCTTAGCAGCAAGTCGGTAGCCAGCGCCGTGACCCTGCCCGTCTACA  
ACACCACGGAGGAGGGCCCCGCTGGCAGCAAGGCGTGGCGCATGTTTTACAAAGTTGGCGCCACAGACAC  
CATAGTGTCCGCATGGCACGGCTTGGCCCTGTACGCTGGCGCTTCTGCCGATCCGCTTGTCTCACCTGT  
GTGACTGAGATCCCGAAGGGCAGCGCGCAAGCTCGAGCTGAGCAAGGAGGAGCCGTACAACCCCATCA  
AGCAGGACATTTTCAAAGCAAGGAGGGGCATCCGCTGCGGTACTTCTCGTACGGCGACATGCCTTTCAA

CTACGGATTCTGCCCCGACCTGGGAGGATCCGGTGCACATCGACCCGAACACCAAGTGCAGCGGGCAG  
GGCGACCCCGTCGACGTCGTACACATCGGCACGCCGATCGCGTGGGCACCTACGGACCAGTGCCTATCC  
TCGGTGTGCTCGGTCTCATTGATGAGGGCGAGACCGACTGGAAGATCATCGTTCGAGTCTGTGTCGGCGAC  
GGCGGGCGAGGGCTACGGGACGCTGTCCAAGGTGCCGAGGAGTTGCAAGCGACCATCATCGACTGGTTC  
GAGAACTATAAGGTGCCGGACGGCAAGAAGAGGAACGAGTTTGCCTTTAACAAGGCGATCAAGGATGCCG  
AGACGGCGCTTAGCATTGTGCGCCAGTGCCTCGCAGTACAACGCCTTGATGGAAGGGAAGTGCGCCAA  
CCCGGGCTATTGGCTGCGGTAG

>AY437471 1, 690 MP18

ATGTTTTCGGGCCTTTCCCTGCTGCAGCGACACGGTCGATGGCGACCATGACGCATCCGCTGACCTCCG  
CGACGCAGTCCCAGTCCGTGACAAGCACGCGCGCGGACGTCTCACGTGTGCGGATGCGCGGGTGCAGCAG  
CAGCAGCGGCACCTCATCAGGCGACGTCTCTTCTACAAAGGGTGCCGCTTTAGCGTGAGTCGATCCGGT  
CAGCGCGCGCCGTCGATCAACTGCGTGACACTCGTTGGGGTGGTGCATGACATCCAAACTGGCTACGTCT  
TTGAAGACGCTGTACCCAAATTCACGCTCACCACGACAAGCCTGGACGCGGCGAACCAAGCCCAAGAGTG  
CGTGGTGGAGAAGGACCATCACACCGTGCCTGCTATGGCGATGTCTTTCCCGGGAAGTCCGCGCCAAG  
CTGAGCGAGGGCAATGTGGTCTGCGTGAATGGCCGTCTGCGCTTGAATCCGCAAATGGAGCCGTCTGCA  
ACAAGTACTACTACTTCCCTTACATCCAAGTTCAGCCGCCGACGGCCAGGTGAGCGTCGTGTACGGCGA  
CCGTGCTCCCTCCGTCGCGCGGTGAACGCGCGACGGGTGAGCTGAACAATGGCAACGGCGACCCACA  
AACAGCGCAGCACCGGCCGAGGATGGCGATCCTAGCGCGACGACGCAGAAGACGCGTAA

>AY437472 1, 741 MP24

ATGATATCGCTGCGTGAGGGCAGACGTCTCGCTAAGATCGCTGGCTGCTTTGACTCTGCTAATGGGTGCT  
CTTCGTCTTTGCTGCGTCGTCACCGATTCCGCATGTGCGCAGGGTCAAACGTCACCAGCTCATCATC  
CTCCTGGGAGGAAATCAAGCGGCGCAACATCAGGTGTTCAACGAGCGGCACTTAACCGCGAGAACACC  
ATTGCTGTACGGTGTGCTGTGAACATGGCGCATCTCTCCGTATACGTGCACTCAGTGCAATGCGGGT  
ATCCGGCCTCTCACGCGCCAGGACCGTCTGGGAGGGCGTGCCTGGCAAGCGCACCATCACCAGTGAAC  
GTTGACGAATCAATCTTGCCTGCTGCTCCTGTGGGTGTGATGGGGTGCCTGAGTTGTTGGCCGTG  
CGGTGCGCGCTGTCTCCCGTGTGTGAAACGTGCTGGCGTGCCTCCAGCCGCGGAGCAGCGACA  
CCACTAAGGCTGGCAGCAGATCCAGACTGCTGCGCCATCCTCGACGCTGTGCGGAGAAGGACAAGCTGCG  
CCGCATAAAGTCCCTGGGCCGAGGAGCTGGTCCCTCCATCGATGGGTGGTGGTCAGCGGCCAGCTGCGCATG  
GAGGACGTGTACGACGGTGATTTGCATAAAGTAGTGGCAGTGCCTGGTGTGAGGTGGCAAGGGACCACT  
TTAAGGGTAGCGTCTGCACTGCCGCCAGGGTTTCTATGA

>AY437473 1, 1347 MP42

ATGCGACGGATTGGTGTGGCAACATGTCAGCGACGGTGGCTTGCCTCAGCAATGCTGCCCGCGCCGGGA  
AGTGCAGAACGCCATGGTCAGGGCACAGCTTCATTCTCGATAACCGCGCGTCTCTACAACCGCCGTCGG  
CGAAGTGCCTCCACGGCGGTCTGCTGCGCCCCGAAGGATGCGCAGTATCAGTGCCTGAGTGCGGCAAA  
ACGTTCCGCTCGTCAACGCCCTCAATCACCACATTATGACCCGCCACGGCAACAACGCCAAGGCGCTCA  
TGAAGAAGGACGGCAAGCTAGTCCCTGTGAAACGGACCAGCTCAAGGGTGGGGCGCATTGTGTCTCTC  
CTCCTCCTCCTCCACAGCGACGGCGAGCTCGGCAACTCCGGCCGGGGTGCCTCCGCGCAGCGTCTCCTCT  
CCTACTGTCCGGCGGCACCACCTCACCCTTCCGGTGCCTTTGCCGCTCCTTTTGGTGCCTCCCGCCGAT  
CCATGGGCGGGGTGGCGTCTTCCACTCCACCAGGCACCGCACCAGGGGTGCTGCAGGCCCTGCGAC  
CGCCGCGGGCGCAACCACGGCAGGCACTGACGAGAATGGGAGCGGCGCGACGGGGCCGCGGAGGAG  
AGGGAGAAGCGCATGTTGCTGTCACGGTGTGCCAGAAGACGTTTTCGGCTTGAGGCGGGCTACAGCACC  
ACTATCAGGCGAAGCACAACATGGACATGCCAACCTCCGCTCGTCTCCGTCTGCTCGCGGCGGCGGAG  
CACGACAGCAGGGGCTGGCGGCGCTCCGTGTCCACTCCGGGAGAGCCTGGTGCGAATGGTGGTGGTAGT  
GCAGGCGGCTTTGGTGGCGTGCCTGGCGTAGCTGCAGACGGTGCCTGCGCAGCTCCTGCGAACGCTTCTAGCT  
TCGGTGTGCGCAGTACGTGCGACAGCAGGAGGGAGCGCTGCCTGACCCCCGAGTACCACCTCGATGT

GGCCCCGAACGCCCGGAGGAGGGCGACATTGCCGCGCACTGGCGTTGCGTGAACATGTGTGTGCTGATG  
GGCGACGTGCAGGAGGTGGAGGAGGGGTACGTCTTTGAGGATCATGTGCTGCAGTTCACTGTGGCGACCG  
AGTTTGCTACCCCGGCCCTGGCGACCCTGACATGGACTTCCACACGGTGCGCGTGTACGGGCACGAGTT  
TTGGGCCCCACTGAAGGCAGACATGCAGAGTGGCGGTGCTTTCTCGTCACAGGACGACTGTGTATGGTG  
CCGCAGTTTGATACGCAGCTGAAGAAGTACTATCACTATCCAGTGATTCAGGTCTTTCCCGGCACTGGTA  
ACGTGGTGGTGTGTTGA

>AY437474 1, 1290 MP44

ATGAAGCGGACATGTGCTCTCTGCGAAGTTTTCCGCAGGTCCGCTTGACTTAGCGCATTGATCTGTA  
GAAGCGGGTGGTTTCTTCTCTACTCGCGCTGCCTCATCAAAAATTCCGGTCCGCGCCGCGCACAGGAAG  
CTCTTCCCTTCGCGCGTCAAGCCGCGGAATGGCACCGCCGACAGCAAACTCTTTCACTGGACGCCAACCTG  
CGCAACACCCTCAGAAGTCTGCTCATTGAGCGTCTGTGCAGTCCGACACAGCCCTGCCGGCAAAGCAGT  
TGTATGATGAGCTGACGAACCGCTCGCGTCTCGTGGAAGAGTTTCACTTCTCGAAGACGTCACGCCGCAT  
CACCCGCCAGCGGCTGGCACTGCAGTCTTTCGTCGATAACAACGTGCTGTTGCACGGCCTTCTTTTTAT  
TCGGAGGGCACGCGCACGTGGAATACGACGACGGAGTTTCATCGTCTCGCCATCCTTGGAGAGTCTGTGC  
TACTAACCGAAGTTCGCACTCGGCTGCTGAAGCTTTCCTGTGTCATGCCGTATGCCGGTACGTCAGAG  
TTTGCTCACATGGTCCGGGAGGAAGCGCTGGCAGCAGCTTTTGACCGGTATGAGATGCAGAACATTGTC  
GGTGCCAAGCCATCTAACAGCGCAGCGGCACGCCGCTCACTCGAATGCAGAAAAGCCATATGCTGTGCG  
CTATTGTAGCGGAGATGTAAGTGTACAGCTCGCACGAAGCCACCGACTTGACGCACAACAACGCGCT  
CTTCCCTCCATCTGACGTGCTCATCTTGCACGTGCTGTCCACCCACCTCCTCGAAAAATTTGCCGTGACAG  
CTCATTTACAACGTGCTAGAGCCGATCGTGGCGGACATCAAGCGCGTATGGGTGAACGAGCCGATGTCGT  
TGCCGTCAAACTGCGCTAACCCCGCGGACTGTGCGTGCCTCTCCCTCAATGCTGTCCCGTCGATCT  
CCGCTACACCCGCAAGGAAGACGCTGTCATGTGCTCCAAAAAAGCATGAGGAGGCTCATCGCCGACAA  
CACGCGTTACCCGCGAGCCGACACAGCTGCGTCAAGTCTTTCATGCGACCGTCGTGCAACTACCGCA  
TATTTGACGGTCCACGGTATCAGATACTGAGCTCCGATAATCGCGTGCACCACTACCGCTTGACAAGA  
GCGGAGCAGTCTTCCCGCTTCGGCTGTGTGCACCGTCTTGACGATGCGGACAGCGCCGACGTCGGATG  
GAGCTTGCCAAGATGGCGGAGCAGTGGTGA

>AY437475 1, 1257 REL2

ATGCTTCGGCGATGCCTGCTTACACGGCTCGTGCCTGCTGCTGGTCCCTCTTTTCGGACGAAAAAGAAG  
CGCTGTTCCGAGCGCTATAGCGAGATTGAAAACGCCCACTCACGACGCATTGAAGCACTGAAGGACGCGGG  
TCTCTTCAATGATGAGTGGATTGCCACGGAGAAGGTGCATGGCGCCAACCTTCGGCATCTACTCAACAGAG  
CATGGGAAGACTATTCAGTACGCGAAGCGGAGCGGCATTATGCCGCGTACGAGCACTTTTTTTGGCTACC  
ACATCCTCATACTGATCTCGCGAGGTATGCCAAGCAAGGGCGAGAAGTCTTACAGAACAGCTCGGCAT  
GTCACCCAGCACCGTAATCATCAACGGTGAAGTGTGTTGGTGGCAAGTATGACCATCAAGCGTGCAGGAG  
CGGCGGCAGAACGTGATGGTGGCCGGTAGGCCACGCACCATCACGGCTGTGCAGAACAAATGCCCTTCCCTC  
AGTACTGCCAGACCTGCATTTCTATGCCTTTGACATCAAGTACCGGAAGACCGAGGAGGAGTACTG  
CACCATGACGTACGACCAAGCCTTGGCCATCTTCGAGAAAAATTTCCGGCCTGCTCTACGCGAAGGCTATC  
ATTCGAGGGCCGCTGAGCAAGTGGCCGCTTCGACGTGGAAAATTCGTCACGACAATCCCGCCGCTGG  
TGGGCATGGGCGACTACCCGCTCAAGGGAACTGGGCGGAGGGCCTCGTTGTAAGACTGCCGTCCGCG  
CGAGCCTGACTTCGACGCAAAGGGCCTCACCATCATGAAGTTCAAGTGCACCGCCTTCCAGGAGATCTCG  
ACCGACCGCCGACAGGACCGCGCTAGACGCGTGGAGGAGTTCCGGCGGAGTCCATCAAAGTCTCCG  
GTGTACAGCTGCCGGACATGGAGAGCGTCATCGCGACCCCGAGGTGCTCCAAGCGGCGCATCGCCTGCT  
CGACCACGTGTGTGAGAAATCGCCTTCAGAGTGTCTTGTCCAAGATCGGTACAGGCCGTTTCGAGACGCAG  
TCCATGACCCCAACAGAGCTCTCCACGCTGCTCGCAAAGGATGCGCTGAAAGACTTCTTGAAGGAGGCGG  
ATGCAAAAATCGTCAACACGCGGCTACTCGTGCAGCGGAGATGGTCCGCTACGTTGTTTTGAGGCGCG  
CAAGTACGTGGCCAGCAGATGGAAGGACGTGCTTGGGCGAGCAAAAAGGAGGCAGACGGGGCGTCTGTA

>AY437476 1, 1473 REL1

ATGCGTCTGACTGGCACTGCGTTCGCGCGCCACGCTGCAGTCATGCCACCCTGTGCAGCAGTCGCGGAGGGCG  
GCAGCGTTCTGAGGCGCCAGGCATCGGCGACCGCCATCTCTCCACCATCCCTCTCCACCACCACCACCAC  
CACCACCTCGTTCGAGAGTCTCGCCACGGCTGCGCTCACAACGCCGCACCGCTGCTACATGCCACTTCCC  
CGAAACCAAGAGGACTTCTCGGCCTACACGGAGATCGATCTGCCGACGGAGACGGGCATCGACGCGATCC  
GGCGCACGGGCATTGCGAGCCAGGAGTGGGTGGCGTGCAGAGAAGGTGCACGGCACAAACTTTTCCATCTA  
CCTCATCAACGAAAGCGAGGTGCGGTTGCGGAAGCGCAGCGGCATCATGGACCCGAGCGAGAACTTCTTC  
GGCTACCACCTCCTCATCGACGACTTACGGCGCAGGTCCGCGCGCTGTGTGCGCTGCTGAAGCGCAAGT  
ACGGCGTGACGGGCCGATGGGCGCGCTGCTGCTGCACGGGGAGCTGTTGCGGTGCCAAGTACAAGCATCC  
GCTGGTGCCEAAGAGTACCAAGTGGTGCACGCTGCCGAATAAGAAGCGGATTCCGATCTCGGGGGTGGAG  
ATACAGAGCGAGCCGTTCCCGCAGTACAGCCCGAGCTGCACTACTTCGCATTGACGTCGAAGTACTCCG  
TCTCGGGTGCAGGAAAGATGTGGTGTGCTGCCCTTCGACGACTTACGGAGGTGTGCTCGCAGGTGCC  
GAATCTCCTGTACGCGAAGCCGCTGGTGCAGCGCACGCTGGACGAGTGCCTCGCCTTCGACGTGGAGAAC  
TTCATCACACCGCTGCCCAGCTGCTCGGGTGGGCAACTACCCGCTCGAAGGCAACCTCGCCGAGGGTG  
TCGTCATCCGTCACGTGCGCCGCGGCGACCCGGCGGTGGAGAGCAGCGGGGTCTCGACAATCATCAAGCT  
GCGCTGCTCTTCTTCATGGAGCTCAAGCACCCCGCAAGCAGCAGGAGCTGAAGGCGACGTTCTTCGAC  
ACCGTGCGTGCCGGCGCGCTGCAGCGCGTGCAGAGGCAAGAAGGTGACGGTGTGCGGACTCGATGC  
TGCCGAAGCTGGAGGCGCGCGAAGCGCTGCTGCTGAACAACGTCAGCGAGGGTGTCTGAGCAACGT  
GCTGTGAAGATCGGCCGAGCCGCTGCTGACCGCGACGTGAAGCAGGAAGATGTCGTGCTGATGCTC  
GCGCAGGACGCCCTGAAGGACTTCTGAAGGAGACGGACCCAGTGGTGTGCTGAACACGTCGCTGCTGTTT  
GCAAGACGCTGATCCGACGCTGTACTTCGCGCGGAAGAGCTGCTGCAGGGCGAATGGAAGCGCGTCAT  
GGACCGGTTGAAGGCGTCGAGGCGGAGATCGACCGCGCAGCTGCCGCGCAGGAGAAGGCAGAGGCGCAG  
TGA

>AY437477 1, 1533 RET2

ATGCACGCTCCTACGCCACTGTACCTCTACGTGGCCGTACGCGCGGGTTGTGTTCCAGCGCGGTGGCGG  
CGTTCGAGCTCGGCTGACGCTGCATCTTCGCCGAGCGCGGCGTCTCTGTCGACGTCGAGGGGGTCAGCTA  
TGCTCGCACCTCGTTGCTTCGAACGATCACTACGTACAGTGGGGTGTGCTGCACTGCTGGAGGAGAACAGC  
AAGCGGATCGGTCCAGAGCAGATGTTTCGTACGGCCATTCGGGCCCAACAGCAGCTGCAGATGCTTGCCG  
ACAAGTGGACACCGGATGCGAAAATTTACTGCTGCGGGTGTGTTGGTAACGCACGGGCAGATGGAGTGGGG  
CAGCGACCTCGACCTTGCTGTGCTTCGACGACCCGTACCCCGACCACTCCGTGCAGGCGAAGCGCACG  
GAAAAGCTGTGGTCAGTTGTCAAGCGCTACATGCCGAGTTTCTGCGCAACAATCTCTTGCCCTCACGG  
AGGCTCGCACCCCTGTGCTGAAACTGCGCTACGTCAACGACGACAAGGTGCGCGGGGGCGGTACACCGT  
GCTGACGGAGGAGGAGACCGCAAGTTCGCGCACGACCCGTGGGACATACGCAACCGCCATCTGGATTCC  
AAGGACCTGGAGTACATCGCCACAAAGATGGGGCGAGAGAATATCGAGGGCATCTGGGTGGAGCGGACGA  
CGTATGGCTGCCGGTGCAGTGCAGTGCAGTGCAGCAAGCCGTGGGGCTGTGCGCTTCTTCCC  
AGATGGGGTGATCATGACCAAGGGCATGCGCGAGGACTACACGCGGACATGCTGGACCTCCGATACGTG  
CCGGAGATGTTTATGTACAAGTGGGATATTTCTTTTGTGGCTTACGGCGTCAAGAACAGCTACCTGCTCC  
GCCACTATCTGCACAACGGCCCCCAGCTGCCCGCCACGCAGCCATGGCCGCGAAGGCGTGGGGCAAGGC  
CTCCGGCGTGGGGCTGGGGACGGCAGCCATGCTCACCTCCTACGCGGTGACGGTCATGTTTGTTCACTAC  
CTCTTGGAACCTCGGCAGCTGGCCTGGATCGACCCGTGGTCTGTTAGCCCATCCAGTCCACATGCCGCGCT  
TCCCCGACTTCTCCCCACTTTTGGACTGCGACCCGCGGAGCTCGGCAAGCTCCTGCACGGCTTCTTCAT  
CTACTACGCGTCTCACTTCAACTATGAGAAGAACATTATCAGCCTCAGCCGCCACGGCTTCACTCCGC  
TCCGACGTGAACTGGAACCTCCCGCAGAGCAAGCAGGGCACATTAGCTACCTCCTCGGCATCGAGGACC  
CGTACGAAGACGTCGGGGTTGGCGGACTGAACCTCGGTGCCACCTGCATCCAGCTAAGTTCAACCAGGT  
GAAGCAGGAATTCGCGCGTGCAGCCACCACGATGGAGCGCTACGTGCCGTGCAATGCGCCCGAAAAGACA

ATCCTCGGTGTCAGACGCGGGGTACGTCTGAACCACCATCATCACCATAACCGCTTCGATTAG

>AY437478 1, 1764 MP61

ATGAACCGCTGTGGTGTAAGAGGGCCCTTTCCTGCGGCTGCCAGTGGTGTCAATCGCAGGCCTTCGGC  
GGCGAGCGGAAGAGCAGCAGGCACGCGTAGCGGCAGTGTGCACTTTGTGTCTCTGCTGCGTCTATTGG  
CAGTAGCACCAGCCTCGCTAGCACCCCTGGCCGAAAGCTCCCGTGTACTACAACCTTTGCCACGCCGGTG  
AGTGTGCTACGTGACGCGGCGGTAGTGAAAGTGTGTCTCACCGACGCCCGCGCCGAGAGCGCCGGCTC  
GAGAGGGAGGGCTGCTACTTGTGGCGCCGCGCACGCCGAACCCGAACGCCGCTTCAACGGCTGAACAT  
TTTTCGACGCGAGTTTTCCGATTTACGACGCGCCCAAGCTCAATCCGAATATCATGGTGAGCGTCGAC  
ACCAGCACGCGCCGCTTCCTCGAAATGTTCTGTGACTTCGATGCCAAACGCTGCAAGCTGTGCAATGAGA  
CGTTCTTGCAGTGGCACATCCACGCCAACGGCATTCCGCACGCGGGGCGAGAGGGGATGCTGCTGGAGCT  
TGTTCCGCCGATTGTGGAACCTCCGGATGAACTCATAGAGATGTGGTGGCAGCGGCTGAACTCGTGTGCT  
GCGTTTTACCCGATTCCCGGCTTGAGCCACGACAACCCACACGAGCGCAAGCGGCGTCTGCTATATCTGT  
TGAAAGTGTGAAAGACCGCGGCATCCTTGTAGAGACGTTCAACGTGAGTGACAACAGTCCACCAACTC  
AGCGCGCTCGTGGGAGTTTGTAGCGCCTCGAGTTCGTGGGCGACAACGTGGTCAAGTACGTGTTGAACAAC  
ATTATTTCTGTGCATTTCCACCTCACGAGGGCGGCACAAAAGGAAAGATGACGTGCTTTCAGTTCGTGA  
TGGACGGCAACGATGGTTTGGCACGCGGCTACGACCACCTCGACCTCCAGCAGCTCGCTCCAGCCCTAG  
GGTAGTCAGCAAATTTAAGAGCGACATTGTGAGACCCTGTTCCGCGAGCTGCAGATGTACCTGTGGAGC  
ACGCAGCACGATATTGGCACCTGTCTTGTGTTTTCCATTTACGAAGGATATTTACACCTGCGGGCGC  
TGGTACAGCATGTGCTGTACGAGCTGGGTATTGAACTCTTCTCTACCACATTCGCCACATTAACGGCAT  
GCTACAACCGGTGATGCGAGAGAATCACCTGCAGTTCGTAAGAGCAGATTCCGCGCTGAAGCCAGGGCG  
GGCGCCAGGACCGGGAGCTTGGGCGTGAGCACGCGCCGTGGTACTGGAGCGATGACGACGATGACTACG  
ACTGTCCGCAAAGCTACGGTACGCCGCGGCTGTCCGCCCCACGGCAGCCCTCATGAAGGTGCGCTCGCA  
GCGCACCCACGTGCAAGGCACCGGTGCGGCGCTGTTCTTTGCCTCCACAACTACGATAACTTCAAGCGC  
GTGGTACCGATCGGCGGTCTTTTGGCGCGCCATTTGCGAGGCAGGATTTGTCAGTCATCCCAAACCACA  
TGCCGCACCTCCGGAGCGATGGCGGATGACGCGGAGGATGAGGAGGGTCCGGAATGCCGTTGGTCGAC  
CCTGCACGCCACAGCAACAGCTCTGACCACGTTGGAAGCGTTGCCGACGGTCTCGCCCTCAGTGCCGAA  
ACAACGCCTCGTGTGGGAGCGAGCCAGTACGCTTGTGAGTTCCGCGTCTCAAGGACGAGGAGCTCATT  
CAGAGCTGATTTAA

>AY437479 1, 1872 MP63

ATGACGATGAAGAGGCGGATCGGTGTCTTGGCCGCTGCTGCAGCGAGCCGCTGCGCGCTGCGCCGGCTGC  
ACCACGTGTGCTCTCGGCCCTTGACGCGTGGGTGCTGTGCCTCCGCGAAAGGCGCTCAAATGCCGC  
TCTGTTGGGGCTGTGCGGAATCAAAGTCCCGTCCCGACCGGCGCTTCCACTGCAGCGTTTGCAAAAAG  
TCGTTTCGCTTAGAGATGGCGGCAAAGCTGCACCTCAGCAGGTGCACAGCGGTGAGGGCGCGTGGAGG  
CAGGCGCTGGTCCCGACAGGGAGAGGATCAGGCGTCGCAGACCCCGGTGGGTGTATTTGTAATGCGCC  
TCCGACGGACCAACCGTCTTACACCGATCGTGCCAGACACTCACGAGCGCGCTGCGCGCCGTGAGAAG  
CCGGCACCAAAGCCACTTACCAAGCCGAACGCGAGGTGCCAGGTATTGTGATGGAAAAGATGCTCTCTG  
TATGGGATGACACAGGGGTGAAGCGGATGGGGATCAGTTTGTTCACAGTAGCATGGTAATGCGCGTGT  
TGCCGCTCGCCGCTGTGACAGCGCCGAGCCGTTGTACGGCGTCATGAATCCAGAGGGTGAGAACCCGTT  
GAGGGTGGCCCGTATGCCCCGACGTGGCTGGTTCTATCACGAAGGACGAGGTCAAATTTTACAACATCG  
GTATAGGTGACGCGTTTGCCTGGCGTGTGGCGAGTCTTTCCGTTCCATTGCGTCTGCTCGGTGCCAAA  
CCCATTCTCCGAAAAGTACGAAAGGATGCTGCGAAAACCGCCCAAGGGTGGGGTTGGCAGAGCAGCAA  
ACGGCGCCGGTAACACCGTTCGGACAGCTCCCATGTTTGGGACAGCTCCGTCCTGCTACGGCCCCAG  
CTCCAGCGCCGCGGAGGAACCGTCGACCACGATCAACAGCGTCGTCTCTTCCCCCTTCGCCGCGGCGC  
CAACGACTCGCCTTTTGTGGGACGACGGACTTTCCGTTTGTGGGCAAGGGCTCTCTCCGTTCCGATCG  
GTGAAGGAGCCAGCAGATCAGCCGCTGCCGAGCCGGGATTGCCGCGGATCGGCGCCTCGTCCGAGG



CGCCGGCCTCACCGTTCGTGGCTGCATCTAGTGCTCTTCTCCGTCCCCGTTCCGCCGAGCTCCGAGCCC  
TTTCACCGAATCTTCTGGGGCAGCAGCCCCGTATGCTGCGAGGGACGCAGCCGCGGTGGCAAGCGGCGCT  
GAGGGTCATGACGCCGCTTCTTTTCTCTTCCGCCGCGTCTTCCGTGAGCGCGCCGGCTGAGGTGGCGC  
CCGCACCGACGCATGTGTGTACCGTTTGCAAGAAGAACTTTTCGACGTATGACGGCCTTCGAATGCATAG  
CAAGGCCAAGCATGGGGAGGAGCTGCCGAAGGGCGGCGAAACGGGAAGCGCGAGGTTCCGGACTTACCA  
GCTTTCATTCCCAGTCCGGTGGACCTCACGATGACGTCACCCTTCGGCTCGTCGGCGCAACGGTCGGCGT  
GGACGGAAGTGGAGCTGAAACCGTACGCGCAGTCTGTGAGTAACATTACTGTGGCGGGCCGCGTGTGGA  
TAGCGAAGTTTTGAGTGACGGGGCGTTGCTTTTGTGCTTTTTCGTCCGCGACTCGGCCGAAAGCGAGTCT  
GAGGTAATTCCTGTTTCGATGCACCTCAGCTGCCTTTAGAACGCTTGGCAGAACGCTCGTGTATGGCGATC  
TCGTGTTTCGCTGTGGTTCGCTGCGCGTTTTGCCATTTACGATAAGAAAACAAAAAGAGATACTCCTC  
GGCAGTCGTGCACGTGGGTCTTCCAACCTGGCATGATTGCCAAACTGAATTGA

>AY437480 1, 1896 MP67

ATGCGTCTTCCGCCACTTCTGCGTGGCGAGCGTTTTGCCATATCCCTGATGCCTTGCGCACGCATCGTC  
GTGACTTGGTTTTCGGTAACATGTTTCATCGTCATCGAGGCCACCGCTACGTGAGGTCACGAAGCTTTTTGC  
CAGCCCCATGGTGCAGGAGTGGTGGGTGAGCGCTGCTCAAGAGGCGGTTCATCTCCCGGAAAGCCACCAGT  
CGGGCAGAGCGCATTGTGACGGAGGCCGACGATCCGCGCTCCGGTACGAGTCACTTCTACGATAGTGATG  
CCAGACTCTGCCTCGTGTGCAACGCGCGTCTGGAGGGCAGCTACAGCGCGCACAGCCACAGCGTCGACCA  
CAAACCGCGCGTTGCACTTTTGAAGCGACAATCGGTATGATTCTCACATTTCTCGAGCAGGCCGGCTCA  
TCACCGTCGCTGCCGCCCTCCGGAGTCGACTCGCCGTACTCGTTGCCTGGCAGCAAACGTTCTTAG  
TGTCAGTGTCAACTCACACAGAACACCTGCCGCCCCAGCCCCTTCTTGCTTCCACGCCTTGTATGCCGA  
GTCACCTCTGTTTGTGAAGACGGCGTGCCAAGTCGCGCGCTCCTCTATCACCGCCCGTGCACGCTGCGC  
GAGTTTGCACCTGGTAGACGTGATCATGCGGCGCTGGTGGAACTTTGCATAATCCACCACCTAGGCGGG  
GTAGTATTTCTTTGACCGCCTCCTCTCGCTTTCCTCGGCTGAGCTGCAGATGCGGCGATGGCGTGTGCG  
TTACCTACTCCACTTTCTCAAGTCGAGAGGGGTTCTCCGCTCTTGCTAACACTGAGGTCCGACCAAGTG  
AATGCGGGCGCGTCCCCAACGAGCGTATTCACCGTGGTGGAGCCCTTTGAGCGGCTCGAAAATGGTCGGCG  
ACTTTTTCTTCAAGAGCCTCACCCCCGACCGAATGCACACCGTCTTCCCGGCTGATGAGGGTGGACTTAC  
AGCTGAACTCCAGTGCTTTGAGCGGGCCTTGATTTCGAATCACGGTCTGCTGGCCATCTATGACTATCTC  
GGTCTGGATGACATAGTCGGCTGCTTTTTGGCCAACAACAAGGCAAAGGCCGACGTTGTAGAGGCCGTCA  
TTGGTGAGCTGAAGTTCTGTTGTGGTCTGACTGAGGTGGTGTGGGGCATGGAGTACTACGCCGTACCTGG  
GGAGCGGCCACGCATGTCTACCTGCGAGCGTTGGTGGCGCACACCATCGCCGAGCTGGGGCACACGGTG  
CTGATGTGGCAGCTGGAGAGTACACTACGCAATTGTGCGCACTTCTTCTCAAGCACACCGTGGAGGAAT  
ACTTGGGGCGCGAGAAAGGGAACGAGCGTCGTGCAAGCAGGGGAGGTGACGGGTGCGACGTCCCCGCGGA  
CCTTCCAAAGTACTCACCGCTGCCCGGTTGCTCGCGTGAATCGGCGCCGCTGGGCGTGTGATGCGG  
AGGGGTGAGGTGCCGCTCGCAAGCAAACAGTCTCGAAGCAGCATAACCGCGTCTCCTCAAGACCCGCTTC  
GCAGACTCGCCCCGACTGCGAGCTGCATTCCGGAGGCTATTCGGGATCACTACGCCGTCGGTCGAAAAA  
GTGGAGCTCATATGCCTGTAACACAGCCATTCAAGCCCTCTGCGCCTCCCTCACACAAACTGCGCTGCAG  
CATGACAGCGGTCACACCGCTGACGCTCTATCGTTGAACTCATCGTCGGCATCCTTGCCCCTCTCTCCAG  
AACCGCAGCCGTCCCCAACTACGCCGGCGTATGCGTGCCTCCCTCGCAGTGTGTTACGGGCTCTGGTGC  
TGCGAATTGCGTGGTGATTTCGTAATTCGGCCCCGCCCTCGCTAGAAGCACGTCGACTAGGAGGGTGGCT  
GGGTAG

>AY437481 1, 2970 MP81

ATGCACACCGCCGTCCTTCGACAACTCAGCACACCATCGACTCGTCCCTCTGGCACCGCAAACGGCGGCT  
TCGGCAGTAGCGGTGTCCGTGACGGCAGTGCACCAGCTCCTCCTAGCAGAGGTGACGGTGTGCGACAGC  
GCCGACGACGGTTCGTGCGACGGCGTGAGCTCCGAGCTCTGCTTCTACGAGACGTTTATCTTGTCCGAT  
GTCGACGTGCATCTTGCCCTCCTCGAGAGGGCGCACTACAAACACGGCGTGTGGCTCAACGTGCCACCGC



GTTCAGGGCGTCTTTTTGCAACTGCAAGGCTGCACAGAGGTGGAGATGACGCGGCGAAGCCCCACTCCA  
CCACCGGACTTCCCCTGGACAGTCTACCCATCTACGAACCCCATGACCATAACGGGGCCACCGCGCACCA  
AAATCGGCTTCCACCTTCCCATGCGCTCGCTGCCGGCGTCTCTAGCCCTCGACTTTTTTTTCCCTGGTGC  
AGGCTCTAACGATAGCCTGCAAGCAGCCAACGCCTCCAGCAGCAGCAGTAGGACCCATAGCAGTGGGGGG  
TCTGCAAACAGTGACCTTGGCGCGCGCTACGAAGAAGCCGACAACGGTGCCGGCAGTGGGCATCAGCAGC  
ACACCTCGAGGCTCGACCGCGCGGCGCACGGTACGAAAGGACTCTCCGCTGCGGGCGCTGGGAGTGTAC  
TGGCGACACATCCACGGCGTCTGCGCTGTGTGTCGCGAAAGCTTCGATAATGATGGAACACTACGGTCA  
CACATTACGGTGCAGACCGGGCGCGGCACGTCTCTACCCGGTGCAGGAGGTGGCGCTTAAAACGCTGA  
CACTGCTGGCCGTGCGCGGATACCCCATCGACAATATAATGACGGTGTGGGCCGACATCCTGTTCAACTG  
TCCACTGTTTTCCGCGCATTCGACAGATGACAGACCCGCGGTGGTGCATCGAGAAGCGGGCTGCTCAAAT  
GGCATTATCCTGCGGGCTTTAAAGCGGGTTGGGGTGTGATGTGCGCCCTTGCAGCGCAGAGCCGACGG  
ACGTGGCGGGCTCGCTCAACTCGCGCTACCGGCAACGCCGCGTGCCTTTGAACGACTGGAGTACATTGG  
CGACAACTGCTGGGGCAACAATATTTGCAATCGGATCCTGTTGCTGTACCCTGATCAGCAGTGGCTGTAT  
AGCGAGCGCTGCAGCACGTTACGCTGGTGCCTGATGCATGTGAGATGAACGTCAATCTCGACTTTGTCT  
TCGACACACTGGAGCTGTGGCACCTCTTGTGACACGGCACACTCGCGACTAGGGAGTGGAAAGGTGAA  
GGCCGACCTTGTGGAAGGGATCTTTGGGGAGCTGCACCTGCACCTCTACGGTATGGTGCCTAAGCTGCAG  
GATGATGTGGAGTACGTGGAGACGAACGGCGCTAGAGAGGTGCAGCTGGTGCCTCGTGGAGCACTGCC  
TGACAGAGCTATACGACCTCATCGTGTGAAGCACGCACGCGACCTCGTCACATCAGCCATACCTCTCGC  
GAAGGAGCTGGCGGCGAAGCGAATATGGGCGCGAACGCGCCCTTTTGTGCTGCCGCGAAGCGTCCCAAC  
ACTGGCCGGGCTCGAGGCAAGACTGCGATGAGCAACGGGGCGCCGATGCATCAGCCTTTCCATCGGCTG  
TTCCGACGGTTCGACGCGTTGCCACCGCGGGTATACAGCGTCTTTCCGGCACACACAGGGAGTGGC  
GACCGCAAATGCGTCTGTGGCTACGCTGGAGACCTCTTCGATGTGTACCTTCGTCTTGCAGCAGCAG  
CAGCAGCACGATTTGTCCGATGCGGGCGGCGAGTGGTACCATCGAGTCGCGCGCTGACGGGCGCACGG  
AGGTAGCCGTGGTAAGCAACAGCGGTAAGGTAGCAGGCATAACACGAAAGAGCGGGCCGAAGAAGCGGC  
TGCAGTGGCGAGGGGGCGAGCCGGCGTATGCCAATCTCTCCTTTATTCCCCACCCCTTATCCCTCACG  
CTGTGCGCCTCCATTGGTCTGGGTAGCACGCGTGTCTGCGGCGTTCGCGGTCTCTTTACCGCTCCAC  
ACGTGTACCCCGAACGCGTGCCCAACCCGCTGCGCCTCCTGCCGCTCTCGGCCATCCCAAGCATGACCTA  
CTGTACCCACACGCTGCTCGGACGTTTTTTCGAGGATGAAGATGAGTTACGAGCGCCTTGGTCTGCTTCAT  
GAAGGTTTCGAGCCACATGCACTATGTGGTAAGCCCTACTCCGCCGAGGTGGGCGGTGCTGATCGCCACAC  
TTGTGCCGAGCTCGTGGATGCGCGCCGCTGCCTGTCAAGCCGACCGGTGACACAAAAGGGCGTCCGGC  
CGAAGCGCGTCCGCTTTTAGCGTCCATGGATCAGGGCGGCTGTACTGCCGGGACGCCCTCTACAATCTC  
GCAGTGTTCGCTCCTCGCCTGCTGCCGCTCGCGACCCACGCAACGCCGCGCCGATGAGCACTGCGT  
GGGCGCTGCAGAATGCCGCTTGGCCGCTCTCTGCCACGCCGAGCAAGACAAGAGAGGACGACGACGA  
CGCTTCCCTCGGACAAAAGCGGGCGCAGCGGTGCACCTTCGCTCCCTCCCGCTACGTCCCGCCGGTATT  
CGAGCGCCGCGGCTGGCGTGGTACAGACCGTAACCTCTGCCGCGGCTCTTTGCCTTCTGGCTGTGCG  
GTGTGGCTGACGCCGTGGCAGAGGCTGAGCGACTCACACGCACGGACACGGCGTCCGTCAGTCCCGCTAC  
CCCGCGGGCCCCACCACAGGTGCGCGTCTCTGGTGAAGTCCCAGGCGCAGCACTCGGCAGAAGACAAC  
TCGCCTAAAGCGTCCGCACTGCGTACGCGCAGCGGATGAAGGCGGCAATGGACTACTGGCGGCGCCGCT  
CGCAGACGTCCCTCCAGAGCTTATCGGCCGATCCGGTGAGGCGTCACTGCCTCGCTAG

>AY437483 1, 2028 MP99

ATGTACGGCGTGACACGGTACTTGGCTACATCGCCGGCGTAGGCGGCGAGCGGTGGGATGGGGGGTATCA  
GCAGCACCGGCACCAGCAGCAGTGGTGGTATCTACGCGGTCCCGCAATCAGCTATCGCAACTCCCTCCA  
AATCGCCGATGCCTTTCAGCCGGTGCAGCACCGCAATCAGTGGCCCTTCGATCAGTGTCTATCGACGTC  
TCCTTCTTCGCCAACTCCCTCGGGTACCTCACACGCGACCTGGTCCGCCACGAACCGGACTGGGAAACAG  
TGAAGAATGTCCACCGACAGCTGCAGACCGTATCCTGCGCCGCTCCAGCCGCGCAAGAGCCTCGCATT

CCTGCTAGACGGCAGCGAGCCGCTCTGGATGCTCGAGCATCGACGCCTCTTCCCTGGCCGACGGTACGAC  
TCCAGGGTCTATCGTAGCTGTGCCTCGCCGATGCCCTACCTGCTGGAAGAGAAACTCCGCGGCACGGCCA  
TGGAGCAGCGCACCCCGCCCTCGGAGGCCGTATCAGCGGTCCAGCCACCCCGGACTGGCAGAGGGCAA  
GATAAGTGGTATCTGCTGGACCTTGCAACCCGCACTCTCCGGCCTCCGACGTTCCCGCCGCTCTCCGAC  
TCCACGGTACAGGCGAAGGACACAGTCTGCCTGGTTCGGCGGGCCGAGCTCGCTTGGTTGGCTGTTGGTA  
TGACGCCGTTTCGCAACATCACGAGCGTGACGCTGCAGCAGGGGAGCTGAAGAGCTGCTCGCTGCAGGA  
ATCGATGGAGTGGATGCGGCTGGCTCACCTGCTGAAGGCGGGCCAGAGCAGGTGAACGGCGACGGTGGC  
GAGGCGTTGGCGCTGCAGCGGCCTGGCCGCTGTCCGTACGGATCTAGTTCTACTCGACCTTCTGGCCA  
ATGGTCATCCCACTACAGGGCTGCCGACGGTGTGGCTACGCCGTTCCGGGACGTGCTGGACGCGTACGT  
GGATATGGAGAAGGAACAGCACAGCGCCGAGCGCCAAGCGCGCCGAGAACGTCGGGCGCCTTCGTAGC  
GTATTATTCGACGAAGAGCCGTCACAGGCGTGACCTTGAGCAGCCAAGTCTGCGACTGCGCTTAGTGT  
CCCTGCAGCAGCTGCTCGTGCGCATCGTGCGGGCGTTGTCCGGAGCCACGTTGGTCTGCCAGCCGGCAA  
CCGCCCCACCCCCACGCGGCCACGCTGCTGGAGATGACGCTGCAGACACACGGGCTGCTCTGCGGTGGC  
GGCGTGCCGTTCAAGCGTGGAGCCCCACGCCGATCCGGCAGATGCCTCGAGTGGCGGCAGCAGCACC  
CCGCCTTGAACGGCACCGTGCTTCTGGACAAGTTCGGAGGCTGTCCGGCGGAGATGCTCCTACAGCACGT  
GACTTACCTCCTCAGCAACGAAGCGAAGCAGCGAACGGCGAACCGGCTGACGGTCCGGCGAGGGCAGC  
GACAGCATCTACCTGAGCCGCGAGCGCACACGGCACTTTGGGCTGACCGGCGTCGAGACGCTCCTCCTCA  
GCGCAACGCAGGCAGAGCAGGTGAACCAAGTATTGCCCTTGTACGTTCCGGCCACACCCTTCCTGACGA  
GGTGGCGTCGGACATCACGCAGACACGCAACATCCACGAGGCCGTGCGCAAGACGCAGCGGGTGTCTCAGT  
CGCGTGTGCAGCAGGCCAGTCAGGAAGTGGCCAGTCAATCTGGCAGTGGCACCGCCGCGGTGATGATG  
CTGGCCACAATGGTCCGACCCCGCTCTCGCCCATCTTCCGTGCGACTTGTTTGTGCGCACCGCCGGCGC  
TCGCGGGCCACCGCCGGGTGGGAGTACTACGGCGTGACCTTGGCATCAAGGCAGAGGCCATGAACGTG  
CGGTACAACCTCAACGCATCTGACACGGCGACGCTGCACCTCATTGACAGCAGCGGTAGCAGCAACAGCG  
GTGGCGTACCGGACTGCAGGGAGCGAGTTGGTGGGAGTGCACCCGAGTGGCATGCCCGGCTGA

>AY437484 1, 2982 MP100

ATGCGGGGTGCGCTGGCGGTAGCGCATGTCCGCTCGCCTCCCTCCAGAAAGGGACGCAGCTAGCTGATG  
TCTACCAGCTCCTCATCACCAAGAAGCCGGTTCGAGTACGACTACATCGCGATTGACGTGAACGCCTTTGT  
CGGCGGCGCCATGCGCATAACAAAGAACATGTGCCAGAGCAGCGTCGCAGCAAGGAGGCTTCGCGGCAT  
GTCCTCAACTCCATCATGCAGATTCTGCGGCGCGTGGTGTGCCGTCACTCTCTTCTTCGCTTTGACG  
GTCCGGATACGTTTGCAGGCGTACAAGCTTCCGACACATCGTCGACACGGCGACTCGACATTGCAAC  
TCAGCGCCTCCCGGTGGTGTCTTGTGCGCGCGTGGAGGATCGCATAGTCAAGGCATGCCGCTGGGG  
CGCGGGCTGATTCTGCGGAGGTGGTCTTCCGGTGTCAACGTGGAGGGCCCGGTGGAGCGAAAGGTGA  
CGGCATGGGCTCTGACTTGGCGTCCGCGACGGGGCGCAGCACACCTTCAAGTCTATCTGCCTCATCGG  
AGCAGGGGAGCTGTGGATGAACGTGCTCGCCCTCACGCCGACTTTTCAAGGCACGAGCATCTTGCACGGA  
TCGTCCGACTTGCGCCACATGACGCTCAACGACTCCCTGACATGGCTCCAGCTCGGCGACGACCTGCTGA  
CCGGTGATGCACGGTCACTGCAGCGCGACAGATGCGCTGCTTTATCTGCTGTGCCACGGCTG  
CTCCGCAACAGACCTCTCGCCGCTGTCTGGATCAAACCTTTACGGTTCTCATGGAAGCATAACCAGCTCGA  
CGCCGCAAGCCGACGACCGCCGTTGCGGCCCGGGCACCAGCCTTTCAGCTCATCCGCGGGCAGC  
CGAACGGTGCCTGATGCTTGACGTGCAGGCGCTTACCTACTCTTTGTGGCGGAAAAGGACACTGCAGC  
AGCAATCGAGTGCCTGGCGGCGTGTGCTGCGGGCGAAGGATGAGAGCCTACACGCGGCACCGCTGAGG  
ACCTTCTCCATGCCGCTCTCCACTTCAGGCGGACAGTGCATCAGATGAGAAGATGCGCGACGCTAATATGC  
CCGACATGTTGCACGGCAGCTACCTGAGCCACCTGCTTAACTCCCATCACCTCTTCTGCCATGGTAAAT  
GCTCGGTGGTCCCCTGTGCCGGCCTACATGGAGGCAGAGGTGAAGATGGGGAGCCTTGACCGCAGCGGC  
GCCGCGGGTGTCCGCGCCAGCGTGGTACCCTGGGGGATTGGACCCGCTTTCTGCTCCGCTGTCTCCAAC  
GCGGGGGGCGCTACGCTTTCGCCAGTGACGCAGGCGCTGAGCTGAGCTACAGCACCTCGAAGTGGCGACC

ATCCGCTGCGACGACTGCCGCTGCGAGCGCTGCGTCGTCACCTACCGCTCCCGGCACGACAGCCTACTAT  
CCTTTCTGGTCTCCGCGCAGCCGCTGACGGCAGCCGAGTACACCATCCTTAGCACCCCGAATCCAGGCA  
TCCTCGATCCGCTACTAGTGGATTACGTGCCAGGGTTTACGCCGGCGCTACGGTCCGAGCTGCCGCGGC  
GCTCACGTCTGTGCAAGCGAACCTCCATGAACTTCGCAGCTCACTGCAGTACTTCTTCGCGTACGCAACA  
GCTGATCGGCCGACCCGTCACCTGTGCCTGGCGCCGTCCTACCACTGGTGTCAAAAACGAGAAGAGCAAGG  
TGTGGTCAATGAGGTACGTGGACTTGGGCGTGGTGCACGGCAGCAGGGTGTCCGTCACGCGCGCAGCCT  
GCTGCCCGGCATGAGCATGGAGCAGGAAGCGCCGACGGAGGGCGCCGCGGTATATGACGCCGAATCACAA  
ACGTGGACCTCGCAGCCACGCAGCTTCGCTGTCTTCACAGCGTCGGAGCAGCTACCGGGCCATCAGGAGC  
AAGCGCATGCCAACGGGTCACTGCTTTCATCCATGGCGGCCACGGCTGCTGCTTCCGCGGATGCGGCCGA  
GGTGTCCACGCTGAGGGTGTCTCACGTGGAACGTTATGTTTCGATCGGTACAGCAACCAGCCTACCCACTC  
GGTATGCCGGGCATCGACTGGTGCAGCCCGAAGCGGTACCCCGTGTGGCAAAGCTTATCGACGCCGAGG  
ACGCCGATGTGGTGGGGATGCAGGAAGTGGAGCGGCCGTTTGTGAGTATCTCGCGGCGCAGCCGTGGTG  
CCGCGAGCGGTACATCATGTCCTGCAGTCCGCAGAGCCCATCTTGGATCCGTGGGGCGTGCTGCTACTG  
GTGCGCCGCGGCGGGCGGTGGCCGCTGCAGCAGCTGAAACACCTGAATGTGCCGGCGTGGTCAGGCCACG  
TCTCCCTCATGCCTGTGGCTACGCTGGATTTGAGTGTGCCGCCGCCACAGCGACAACAGTGGCACCCG  
CTGTGGCAGCTCAGCGGAAAGAGCGGCATCAGAAAGCTTGCAGCATCGCCGCGGGTGGTGAACGTCTGC  
TCCATGCACTTGTGGCGCCGTTTGTGAAGGTGAACGAGGTGGCCCGCACGGGTCAGGATCAAGCTCTGC  
GTCATGCGCTGACGCGCAGCTGCAGGGCGACACGCTCGTGATGGGCGACTTCAACGACTGGCCGAGCAA  
CGAGTTCCTCATGCCGCCGAGTCGCGGTACGTCGAGTGTGGCCGATCATTACCCCGGTGACTACGGG  
AAAACAATGGACGAGTCGAACACCTTCTGCAAGCTGAAGATTGAAGAGATCTTCTTTGGTTCGCTCGGACA  
AGGTGTTCTCCGACAGGTACCGCCACAGCCTCGAGCCCCACCCGAGGCGTGCTGAAGCCAGTGGAGGC  
GCATCTAGTAGGAACACGGAGCGTCAATGACGAAAACGGCAACCAAGAAGCACCCGGCGTATCTGTTCCCA  
TCTGACCACTACGGTGTGACGATGCAGTTCGAAGTCTGTGA

>AY437485 1, 1635 He161

ATGCGGCGTTTTGCAAGTGCCTTGTGGCAGGTGGGGTGCCGCACAGTGCGGGGTGGTGCCTTTTCGGG  
CTCGCCCGACTCTTTTGGCCATGATGAGCAGGGTGCCTGCTTCTCTGTGATTAGTGCTGCTTACGAGGG  
ATTGGCCCCCGCAACGAGCTCGAATATCGGCGACCCGCATGCGCCACCGAAGACAAGGGCGTCTGCAGTG  
TCAACAGAGCACGATGTCTATCACGGACGGCAATGGTGTGTCGACGTACCCCGCTAAACTCAT  
TTGAAGAGTTGCGCGATGCACCCGCGATGGCTGGCGGAGGGGTTGAAGACGCTCAAGTACCCCTCCACGAC  
TGACATTGAGAAGTTCACAATACCTTTGCTGGCCAACGGCCACGATGTTATCGGACTTGACCAACAGGC  
TCGGGAAAGACGGTGGCGTTCGCGGTTCCAGCCCTGGCGGGGCTCAAGCCCAACCCCGATGGGACGCCGT  
CTGTTCTGGTTCTAGCTCCCACGCGGAGTTGGTGAACAAACCACCAAGGTGTTTTCAGAACCTTGATG  
TGGGCAGGTGCGCGTCTGCGAGGCCTACGGTGGTGGCCCGCGGATCTACAGGCCCGCCATCTTCGCAAC  
GGCTGCGACGCTCTCGTTGCCTGTCCAGGACGACTCAAGGACTTTCTCGACGGCGGCGACGTGTCCATCC  
GTAATCTGTGCTTTCTGGTCTTTGACGAAGCAGATCGCCTTCTCGACATGGGGTTCAGGTTCACTTGGGA  
TGAGATTATGGCCTACCTCGACTCAGCCTCACATCCGCAGACGATGATGTGGTCCGGCAGCTGGCCAGAG  
TCGGTGAAGCGATGGCGCGCAAATATCTATCCGACGATCGTGTGTTTATTGATTGAGCCGGTACGGCCGGCG  
CGGGGCTTCAAGTGAATGAGCGCATCAAGCAAGAGCTTATCTTCTGCCGAACCTTCACAGAGCGCATTGA  
GAAGCTTGGGTGCTTGGTTCGAGGATGGGACAATCGACGACAACAAGGACAAGCTCATCATCTTTGTGGAG  
CGCCAGGGGATAACGAAAACACAGCCAGGGCTTTTCAGCCACCGGCTAGGAATCGATACAGCTACGTAG  
GGACAATTACGGCGGTCTGTGCGCAGCGGCAGCGGGACAGGGTTCATGAGCATGTTCAAGAGCAACCACAT  
TCGCCTTCTCGTCCGACCGATGTTGCTTCTCGAGGCCTAGACATTCCTGATGTAACGTGCGTGGTGAAC  
TTTCAGGCTCCAAAAACCATGACAGCTACTGCCATCGCATTGGCCGCACCGGCCGCGCGGTCGCACCCG  
GCACGGCTTACACATTTCTTGGCGAAGAGGACGGTGGCCCTCGCAACAGAACTCGTCAACTACTTGACTCG  
TTGTCATGTTACTGCCCAAAGAAGTTGACGCAGCTCGCCGAGAGCTACCAGCATCGGATGCAGCAGCAG

AGGCAGCGCTTCAGGCGTGTGATCGAGGAGGTTTCTCCAGAAGTGAGAACAGCAGTGGGTTTCGGCCGCC  
GCCGAGCGATCGAGGCGGTTACGCGAGTTCATGCCTCGCAGGCCCGACTCGCGCAAGCGCGATGACGA  
TCTTCCGTCCACGTTGACTGGTGA

>AY437486 1, 1707 MP46

ATGCAGGCTCAGCTCGGGAGAGACATGCCGCACTGCTGCGGCTGTACCGCGTCTGCGCCGCCCTGGTGT  
CGACGGCGCCGATCTGGCGCCACCCGGCGACCGCTGCCAAAGGACCGAGTTACAGCGGGATGTGATTGC  
ACCACGCTTGAGTTTCGCCGGAACCGGCGCGCCACCGTCTTACCTCTTCATGCTGCCGCCCTTACTCCT  
GCGCGATGCATGACGACAGTGCCGAGAGCACATGCGCGGCATCGTGTGAGTCGCAGCTTTGTCTGCTGT  
GCGACACCCCTACACCTCTGGACGGAGCACTCCCGCGAGCATGCGCACGTGGCGCGCTCGGTGGTGTG  
CCGTTTTCTTTGTGATGCCAGAGAGAAGCGAGAGCATCATGCAGCACCTAGAGCGGCACATCGCTCTGGAC  
CTCAAGGAGGTGGATGCCCTCACAGACCGCAAGGTAGGGCGGCGCCGCGAGCGTCTCCTCGCGGGCCTTG  
TGCACCTTGTGCGAGAAGGGCGTGTGCGGGATAGCATAACCCACGCTGCCGTTCTCAACGCCGGCACGCGG  
GGAACTGACAAGGGAAGGGGTGCTGGCATTAGCGGCGTGACGCTTGGGGTCGACGCTGACCTCTTTCTC  
AACCGCGTCTCGTTCGGGGAGGCGTTCTGCGCCGTGAGGTGCTTGACCGATGCGCGCGGCTCATGCCGT  
CCCTCACAGCGATGGAGCTGAACAGCGTAGTGACGTAATTGACGTCGACGCGTCAAATGGCTCGCATCTT  
TGACGAGCTGTGCTGATAGAGCTTCTCGTGACGCTTCCGGGTTGGAAAGCGCTCCCGGAACGTGAAC  
ACCGCCACCGCTGCTGCCACTGCCGCGGAAGAGCGGCAGAGTCAGCGAGCGTAGAGCCGCTGAGCGAGA  
CAGCTGCGGCACCTTTGCCAGACAGCGACGCGAGCACAGAGTCGCCACCTGCGCATCAGCCCTGCTCTTC  
CACACTGGCCCGAGTCTTCCCTCTCCCCACGCTGGAGCCTGTCCCGGAGGACAAGGTGTACATCATG  
TGCGCCTGTCTCGGCGAGCTGCACCGCTTTCAGGAGCAGGAGCGACCGCGCTCTGTATCTCAAAGGCAG  
CAGCAGATGCTATTGTGCTGAACGTGCTTGCCGGCCACGGGCGGAGAACCTTGTGTCGGAGTTGGTGCA  
TGAAACATTGCAGCGTATCGTGGACGAGGGGACGGTGGTCTGGCGGCAGCATCAGGAGGATGTGAAGCGG  
CGCGGTCTTTCATCTGAAGCAAACGTGGCAGGGGACGCTCGAATCAGCGCGCGGGGCACCTCGCACGG  
ACAGTACCGTATCCGAGGACTTGTGCTACGTGCGCACTGCACCGCTGCCGTCAGCGCCGTCACCGCGGCC  
GGCGTCTCAGGTTACACTGGATAGCGCAGCAGCGGAGCAGCTCGTGTCTTCTTACTTGCCCTTCAATGAT  
GTCGATCAACTTAGCGGCGCGGAGACTGACGCTGTGAAAGCGACAGCAGAAGCGCCGTCGAGGTCGAGTC  
CGGACCGCACCTGCACTACTTCTCCCGAGTGCATTTCAAGTGTGCTGCACACTTCCGGAGAAGGACTGGGGGCC  
GCTCACGGCGGAGCTGCGGAAGCGTGCCGAGGATTGGAATCGGCTACCCTTTGTGCTTAGCACACCCGAG  
CTAAAAGCGTCAAGATGCCGCGCTAA

>AY462262 1, 1896 PDEA

ATGCTCGACTTTCTTGAGCAGCTGCAGCAGCTGGCAAGTGTGTACGCCATCTGCGGCAATGCTGTCTCCG  
TGATGGCGGGGATGAGCGACACGGCAGAGGAGCTGACGTTCCGTTCTACGACAGTTTAGAAGGCGCCTC  
CTACATCTGCAACTTGAACGAGAAGGCTCTTACACAGCGAAGGCCTCGCTCTGCGACAATGCCGATTGG  
AGCAGCTTCTTTTCGCGAGGTTTCACTGCGATTCAACTCGGGTAGAGTAACCGTGCAGCCTGGAATGCTC  
ATCGAGTCGCCGTTAACGCCCGCGCCAGTTTTCCGCCGACTCTAAAGGCCTAGCATGCTCGATGGAGGT  
GCATTGCTGTGCGGGTCAAGGGGAGAAGTGTGCAACCTTTGTGCTTGGAGCGAACACGGAGGACCAGCAG  
AAGTATATTCTCGAGAGCATGCTGCAGGCACATCACATGTATAACCACCCGAAGGAGTACGAGCAGAAGC  
TGCTCCACATCATGGAAGCCAAGGAGATAGCGTGCACGAAGCGGAGGCACTTGATCGTGAGCTGGTCCG  
GCTGAACGATAATTTGACACGCAACAAGCACAAGCAGAAGATAAACAACGAGCGCAAAGAGGAGCTTCTA  
AAGAAGCTCGGCGGTTACAGCACAGAGAACACGGGAAATCCGTGGCAGGCGATTGAGGAGCAGCAGAGA  
GGACAGCTGGCGAGAACACGAAGTCTCGGCTGCCGAGCCCGCTCGGGAACCGCACCTGCAAGGATTTTGA  
TCTTGTCTGTTTCGCATGATCAAGAGTCCGTGGTGTACCCGAGCAGTGCGACGCATCCTCGCCCGCG  
AATCGCGTCTGTCAGCCGTAATCAAGGAGGACCTCGCGATCCAGGTGAGCCAACTCTCAGGTAGCCGAG  
CTGCGATATGGAAGGCACTGGATTCCATCGACTCATGGAGCTACCGCGTGTGATGTCCAGGCGGCTAT  
GAGCGGTGACGACTACCTCTCGCTCTCGACGCAGACGCACGGCGGGTCTCTCCTGATAACCATGTACGCA

CTGCTGTGCATGCACGACTTTCTGCAAAAATTCAAGATTGACGAGCAAATTGCGCTCAACTGGATCAGCG  
CAGTGGAGGCGAGTTACCATGGCAACCCGTATCACAACCTCGATGCACGCCGCGGATGTGCTGCAGATTAC  
GGACTTCATCATCACACAGGGAGGGTTGGCGAAGAGGTGCGACCTAAGCGACATCCAGGTCTTCTCTGCC  
TTGCTGGCTGCCTCGATCCATGACTTCGACCACCCTGGCATCAACAATAACTTCCACATCAAGACAGGCA  
GCTACCTTGCTACGCTGTACAACGATCGCAGTGTCTGAAAATCTGCACGTGAGCAGCGTTTTCTGAGCT  
CATGAAGAACCAGCCTTCAACATCCTAGCCAGCTTCAGTGATGAGCAGCATCATGAGGTCCGCGAGACG  
ATGATAGAGATGGTGTGGCGACGGACATGGGCTCTCACGAAAGTACGTGGCGAGTCTGAAGGGCAAGA  
TGCAGGAGCACTCTAGTTTCACTCAGACCGCCGAGCAGAATCTCTGCCTCGCGATTGCTCTGAAAATGGC  
CGACATTTCAAACCTGCGGGCGCCCGCTTGACATTTACCTGCGCTGGGGAGCGAAGGTGTGCGATGAGTTC  
TACCAGCAGGGCGACCGTGAGCGCAACCTGGGCCTCGAATGCAGTCCCTTCATGGATCGCCTTCAGCCGA  
GCCTTGCGAAGAGCCAGATTGCCTTCATGAACTACATCATCACTCCCTTCTTTGAGCAGGTGGCCGAGCT  
TCTGCCCGATATGCGCTTCGCGGTGGCTTTGGTGGAGAAAACAAAGCGTACTGGGCCAACCCAGACGAC  
TCGTAG

>AY462263 1, 2793 PDEB1

ATGGCATATTTACGGCCAAGAGGGCGTCTCGATGGGTGCAAGCACCGTTCGGAGCGGCAACGACCATC  
TCCTCGAGGCACTCACGCTGTGCGACTGCATTCTGAGCCGTTACAAGCGCTGCGGGGTTACAGCTCAACGA  
CGCGGAGGCCCGCCCTTCGCCAATTTGCAGCAGCGCATATCTAGCATCTCCGGCCACGCAGCAGACGCC  
GCATGCCAGCAGGCGCCACTCGAAAGCAGTCGCAGGAACTGGGACTGCACGAGTACGCTCAACTGGCGC  
AGCGGTGCCTGATCTTCCAGAACCCCTCGCCCAAATTTGTCGCCACCATCAATGAAGAGTTCTCCAAACT  
TGTGAGCTGTTTCACTGCGCACGCACTACGCCAACACAAACGACGCGGTGCTATGCGACCCAGTGCACGAC  
ACTGTTGCAACCATCGATACATCGACCCCATCGGCAGGTGTGCGAAGACGAAGACGACCGTTACCATTT  
CCGACACGGTGTACATCCCCCTATGTTACAACAGCCACGTGCTCGGCTGCCTGGAGGTGGAGAGCACCGC  
AATCGACACGAGCAGCCGTTTTTCGGGTACCTGCTTCAAGTGGCGGCACTAACACTGCAGAACGCTACC  
TCCATCGATACACTGCGGTGGGAGACTCGGAAGGCAGAGGCCATGGTGGGCATGGCGACACGGCTTGCTC  
GAGACACGTTGGAGGAGTCCGTGCTGGTGCAGTCCATCATCAACACGGCAAAGACGCTGACGGAGAGCGA  
CCGGTGTAGCATCTTCTGTTGAAAGCGGACGGCAGCCTGGAGGCGCACTTCGAGGACGGCAACGTTGTG  
GTGCTGCCTGCGGGACGGGCATCGCAGGTACGTTGCGGAATCTGGCGCCGTGGTGAACATCCCGAACG  
CGTACGAGGACGACCGGTTCCACCGTCCGTGGACAAGGTGACTGGCTACCACACGCGCACGATCTTGTG  
TCTGCCGATCGCGTTTCGAGGGCAGATCGTTGCCGTTGCGCAGCTGATCAACAAGCTGGACATGGTGACA  
CAGAGCGGGCAGCGGCTTCCGCGGTGTTTGGACGGCGCGACGAGGAGCTGTTGAGACGTTCTCGATGT  
TCGCTGCGGGCTCGCTGCGCAACTGCCGCATCAACGAGACGCTGCTGAAGGAGAAGAAGAAGAGCGACGC  
GATCCTGGACGTTGTGGCGCTGCTGTGAATACGGACATCCGCGATGTGGACAGCATTGTGCGGCACGTG  
CTGCACGGCGGAAGAAGCTGCTGAACGCGGACAGGTCATCGATGTTTCTGCTGGATAAGGAGCGCAATG  
AGCTGTACAGTAAGATGGCGGACAGCGGAACGAGATCCGGTTTCCCTGCGGGCAAGGCATTGCCGGCAC  
TGTTGCCGAGTCCGGCGTTGGCGAGAATATCATGGACGCGTACGCTGACTCGCGCTTCAACAGCGCTGTG  
GACCGGCAGCTGGGCTACCGCACACAGTCCATCCTGTGCGAGCCGATTACGCTGAATGGCGAGGTGCTTG  
CCGTGGTGCAGCTCGTCAACAAGCTCGCGACGACGGTAGCGTGACCTGCTTTACACCCACTGATCAAGA  
GACGTTTAAAGTGTCTCGCTGTTTGGGGCATCTCGATCAACAACAGCCATCTGCTGGAGTTCGCGGTG  
AACGCAGGTGCTGAGGCGATGACCTTGAACCTGCAGCGTAACAGCATTACAGCGCAGCGTGCTCCGAAGA  
GTGTGAAGGTGATCGCGTGACGCCGAGGAGCGTGAGGCAGTGTGTCGATCGACTTCGGGGGCGCATA  
TGACTTCACTTACCGGGCTTCAACCTGTTTGAAGTGCGCGAGAAGTACAGCGAGCCGATGGATGCGGCT  
GCCGGTGTGTGTATAACCTGCTATGGAACAGTGGTCTACCCGAGAAGTTTGGCTGCCGTGAGCAGACAC  
TGCTGAACTTCATCTTGCAGTGCCCGCGCAGGTACCGCCGAGTGCCGTACCACAACCTTCTACCACGTCGT  
GGACGTGTGCCAGACGCTGCACACGTAATTGTACACAGGCAAGGCGTCCGAGCTCCTGACAGAGCTGGAG  
TGCTACGTGCTGCTCGTGACGGCACTGGTGCACGATCTTGACCACATGGGCGTGAACAACAGCTTCTACC

TGAAGACGGACTCGCCGCTAGGCATCCTCTCCAGCGGAGCGGGAACAACCTCCGTGCTGGAGGTGCACCA  
CTGCAGCCTCGCCATCGAGATTCTGTCCGACCCCGCCGCGGACGTGTTTCGAGGGGCTGAGCGGGCAGGAC  
GTTGCGTATGCGTACCGCGCGCTGATCGATTGCGTGCTGGCCACTGATATGGCTCGCCACGGGGACTTGT  
CGAGGGTTTTTCGATGATATGGCGAAGGCCGGCTACGACTCTAACGATCAGGAATCTCGTCGCCTGGTGAT  
GGAAACGCTGATCAAGGCCGGTGACGTGTGCAATGTGACGAAACCGTTTCGAGACGTCGCGCATGTGGGCG  
ATGGCTGTGACGGAGGAGTTCTACCGTCAGGGTGACATGGAGAAGGAGAAGGGCGTGAGAGTGCTGCCGA  
TGTTTGACCGGTGGAAGAACAACGAGCTGGCGCGTGGGCAGATTGGCTTCATCGACTTCGTAGCTGGCAA  
GTTCTTCCGGGATATTGTGGGCAACCTATTTTCATGGAATGCAGTGGTGTGTGGACACGGTAAACTCCAAC  
CGCGCAAAGTGGCAAGAGATCCTGGATGGCCGCCGCGACTCCATCCGACCCTCGATTGTTTAA

>AY462264 1, 2823 PDEB2

ATGCATTAGCGGTCTTTTCCCCGATGCGCCGATTGCGGCGCAGCCGGCTCCAATCACCTATGTGAGG  
CGGTTGCACTCTGCCAGTCGATTCTGGCGCGCTACCGTCGGACTGGTACATCCTTCTCCTCCACAGAGCT  
GAAGGCGATTCAAGCCCTGCGCACCGAGTTCCCTGATACCGCGCAAGAGCCGGCTGCGAATAGCGCGGCT  
TCACCCGACCAGACCAGAAAGGACTTCCCTGAGCATTCTTGACGATGCAACCGACGTGCCGCACAACCCAC  
AGAACGACATTGTGCGGTTTGTGGAGGAGTGCTGCGACAACACCAAGGAGCCAACAGTATTGTTTGGCGC  
GATTAATGAGCGCATTTCAGCCGTGACTTGCTCGCGTAATGTCCGCACGTACATGGTGATCGCAAACGAC  
AATCTCCTATGGGACCCTGTCAACGGTGTGCGGCCCTTATCGACGACGTCACGCCCTTGGGCAAGTGCG  
CGCAAGCGCGCAACATGCTGACGATTGCCAACACCCTATACATCCCCCTCTGGTTTCGGTCCGAGCTCGT  
TGGCTGCGTGAGGTTGCCGGTGCCTGCATCCCAAGGACAAGGCTACCTGTGCTCAGCTTCTGCTCCGG  
TGCGTCACCGTTGCCGTTGAAACAGCATCAACATCTCCATCAGAAAGAGGGAAGCAAATAAGATCGAGG  
CCATGGTGGGCATGGCGACACGGCTTGCTCGAGACACGTTGGAGGAGTCGGTGCTGGTGACGTCATCAT  
CAACACGGCAAAGACGCTGACGGAGAGCGACCGGTGTAGCATCTTCTGGTGAAAGCGGACGGCAGCCTG  
GAGGCGCACTTCGAGGACGGCAACGTTGTGGTGCTGCCTGCGGGGACGGGCATCGCAGGTCACGTTGCGG  
AATCTGGCGCCGTGGTGAACATCCCGAACGCGTACGAGGACGACCGGTTCCACCGGTCCGTGGACAAGT  
GACTGGCTACCACACGCGCACGATCTTGTGTCTGCCGATCGCGTTCGAGGGCACGATCGTTGCCGTTGCC  
CAGCTGATCAACAAGCTGGACATGGTGACACAGAGCGGGCAGCGGCTTCCGCGCGTGTGGACGGCGCG  
ACGAGGAGCTGTTTCGAGACGTTCTCGATGTTGCTGCGGCGTGCCTGCGCAACTGCCGCATCAACGAGAC  
GCTGCTGAAGGAGAAGAAGAAGAGCGACCGATCCTGGACGTTGTGGCGCTGCTGTGAATACGGACATC  
CGCGATGTGGACAGCATTGTGCGGCACGTGCTGCACGGCGCGAAGAAGCTGCTGAACCGGGACAGGTCAT  
CGATGTTTCTGCTGGATAAGGAGCGCAATGAGCTGTACAGTAAGATGGCGGACAGCGGAACGAGATCCG  
GTTTCCCTGCGGGCAAAGCATTGCCGGCACTGTTGCCGAGTCCGGCGTTGGCGAGAATATCATGGACCGG  
TACGCTGACTCGCGCTTCAACAGCGCTGTGGACCGGCAGCTGGGCTACCGCACACAGTCCATCCTGTGCG  
AGCCGATTACGCTGAATGGCGAGGTGCTTGCCGTGGTGACGCTCGTCAACAAGCTCGGCGACGACGGTAG  
CGTGACCTGCTTTACACCCATGGACCGGAAACGTTCCAAGTGTTCGCTGTTTGGCGGCATCTCGATC  
AACAACAGCCATCTGCTGGAGTTCGCGGTGAACGCAGGTCGTGAGGCGATGACCTTGAGCCTGCAGCGCA  
ACAGCATTACAGCGCAGCGTGCTCCGAAGAGTGTGAAGGTGATCGCGGTGACGCCGAGGAGCGTGAGGC  
AGTGATGTGATCGACTTCGGGGCGCATATGACTTCACTTCAACCGGGCTTCAACCTGTTTGAAGTGCGC  
GAGAAGTACAGCGAGCCGATGGATGCGGCTGCCGGTGTGTGTATAACCTGCTATGGAACAGTGGTCTAC  
CCGAGAAGTTTGGCTGCCGTGAGCAGACACTGCTGAACTTCATCTTGCAGTGCCGCCGAGGTACCGCCG  
AGTGCCGTACCAACTTCTACCACGTCGTGGACGTTGCCAGACGCTGCACACGTAATGTACACAGGC  
AAGGCGTCGGAGCTCCTGACAGAGCTGGAGTGCTACGTGCTGCTCGTGACGGCACTGGTGCACGATCTTG  
ACCACATGGGCGTGAACAACAGCTTCTACCTGAAGACGGACTCGCCGCTAGGCATCCTCTCCAGCGCGAG  
CGGGAACAACCTCCGTGCTGGAGGTGCACCACTGCAGCCTCGCCATCGAGATTCTGTCCGACCCCGCCGG  
GACGTGTTTCGAGGGGCTGAGCGGGCAGGACGTTGCGTATGCGTACCGCGCGCTGATCGATTGCGTGCTGG  
CCACTGATATGGCGAAGCACGCTGACGCGTAAGTCGCTTACAGAGTTGGCGACAAGCGGGTTTGAGAA



AGACAACGACACCCACCGTCGCCTGGTGTATGGAAACGCTGATCAAGGCCGGTGACGTGTGGAATGTGACG  
AAACCGTTTCGAGACGTCGCGCATGTGGGCGATGGCTGTGACGGAGGAGTTCTACCGTCAGGGTGACATGG  
AGAAGGAGAAGGGCGTGGAGGTGCTGCCGATGTTTGACCGGTCAAGAACAACGAGCTGGCGCGTGGGCA  
GATTGGCTTCATCGACTTCGTAGCTGGCAAGTCTTCCGGGATATTGTGGGCAACCTATTTTCATGGAATG  
CAGTGGTGTGTGGACACGGTAAACTCCAACCGCGCAAAGTGGCAAGAGATCCTGGATGGCCGCCGCGACT  
CCATCCGATCCTCGATTGTTTAA

>AY484446 1, 513 GP63

ATGTCCGTGGACAGCACCAGCACGCACCGGCGTCGCTGCGTCGCCGCGCGCCTGGTGCGCCTCGCGGCTG  
CCGGCGCCGAGTCACCGTTGCTGTCGGCACCGCGCCGCGTGGGCACACGCCGTGCGCTGCAGCACCG  
CTGCGTCCACGACGCGATGCAGGCACGCGTGCGGCAGTCCGTGGCGGACCACCACAAGGCCCGCGCGG  
GTGTCCGCGGTGGGTCTGCCGTACGTTACTCTCGACGCCGCGCACACCGCGCCGCCGATCCCAGGC  
CGGGCAGCGCGCGCAGCGTCTGCGCGACGTGAACTGGGGCGCGCTGCGCATCGCCGTCTCCACCGAGGA  
CCTCACCGACCCCGCTACCACTGCGCTCGCGTCGGGCAGCATGTCAAAGACCACGCCGCGCCATCGTC  
ACCTGCACCGCCGAGGACATCCTCACCAACGAGAAGCGCGACATCCTGGTCAAGCACCTCATCCCGCAGG  
CGGTGCAGCTGCACACGGAGCGG

>AY490814 1, 279 kinetoplast membrane protein 11

ATGGCCACCACGTACGAGGAGTTCTCGGCAAGCTGGACCGCCTGGATGAGGAGTTCAACAGGAAGATGC  
AGGAACAGAACGCCAAGTTCTTTGCGGACAAGCCGGATGAGTCGACGCTGTCGCCCGAGATGAAGGAGCA  
CTACGAGAAGTTCGAGCGCATGATCAAGGAGCACACAGAGAAGTTCAACAAGAAGATGCACGAGCACTCG  
GAGCACTTCAAGCAGAAGTTCGCCGAGCTGCTCGAGCAGCAGAAGGCTGCGCAGTACCCGTCCAAGTAA

>BN000109 1, 630 tag

ATGGATATTCCGGGACTGACGACGGATGAGAATGGCCTGACGCGCTGTACATGGCGCACGGCAGCAGCGG  
AATACCCCGATTACCACGACCATGAATGGGGCGTCCCGTGGCCGATGACATTGCGCTGTACGAGAAGAT  
TTGCCTGGAGGGATTTACAGCGGGCATGGCGTGGATCACCATCCTGCGCAAGCGCGAGGCGTTTCGGCGG  
GCGTTTCGAGGGCTTTGATTTTCGCCGGGTGGCGCAGTACACCGAGCAGGATATCGAGCGGCTGATGGCCG  
ACCCGGCCATCGTGCCTAATCGCGCCAAGATCGTCTCCACCATCAACAACGCCCGCGGGCCTGTGAGCT  
GGTGGATGAAACCGGATCGCTGGCGGCGTGGCTGTGGTCTGTTGAACCGTCCGCCGACGAGCGCCCGCGG  
CAGGTGCACCTGGCGTACTGGACGGCCAACCCGACCTCGGCCGCTTCAACACGCTTGTCCAACGCCCTGA  
AAAAACCGCGCTGGAGCTACGTGGGGCCGACCACCATGTATGCGTTTCATGCAGGCGATGGGCATGGTCAA  
CGACCACCTTGAAGGCTGTGCCTGCCGGCCTCGAATCCAACACCTGCGCCACCACTTCAAACGACCTGA

>J04483 105, 959 P100/11E

ATGGCTGGCGTTGATAAGGCAATGGTCACGCTGAGCAACGGCGTCAAGATGCCGAGTTCGGTCTCGGCG  
TGTGGCAGTCCCCCGCGGGGAGGTAACCGAGAACGCTGTCAACTGGGCGCTGTGTGCCGGCTACCGCCA  
CATCGACACGGCAGCCATCTACAAGAACGAGGAGAGCGTCGGGGCTGGGCTGCGTGCCTCTGGTGTACCG  
CGCGAGGACGTGTTTCATCACGACGAAGCTCTGGAACACGGAGCAGGGCTACGAGAGCAGCTTGCGGCCT  
TCGAGGAGAGTCGACAGAAGCTCGGTGTGACTACATTGATCTCTACCTCATCCACTGGCCGCGCGGCAA  
AGATATCCTGTGAAAGAGGGCAAGAAGTACCTGGATTCTGTGGCGCGCCTTCGAGCAGCTCTACAAGGAG  
AAGAAGGTGCGGGCGATTGGAGTGTGAACTTTCACATCCACCATCTGGAGGACGTGCTTGCAATGTGCA  
CTGTGACGCCAATGGTGAACAGGTGGAGCTTACCCGTTGAACAATCAGGCCGATCTGCGGGCCTTCTG  
CGACGCCAAGCAAATCAAAGTTGAGGCTTGGTCCCGCTAGGGCAGGGCAAAGCTGCTCTCAAACCCGATC  
CTCTCCGCAATCGGTGCAAAGTACAATAAGACGGCCGCGCAGGTGATCCTCCGCTGGAACATCCAGAAGA  
ATCTCATCACGATCCCCAAGTCAGTCCACAGGGAGCGTATCGAGGAGAACCGCGACATCTTCGACTTTGA  
GCTCGGCGCCGAGGACGTGATGAGTATCGACGCTCTCAACACGAACTCGCGCTACGGCCCCGACCCTGAT  
GAGGCGCAGTTCTAA

>L01699 562, 1428 PTR1

ATGACTGCTCCGACCGTGCCGGTGGCGTTGGTAACAGGCGCCGGAAGCGTCTTGGCCGCAGTATCGCTG  
AGGGACTCCACGCGGAGGGGTACGCTGTCTGCTTGCCTATCATCGCTCTGCTGCAGAAGCGAACGCACT  
ATCCGCGACGCTCAACGCAAGGCGACCGAACAGCGCCATCACGGTGCAGGCGGATCTGAGCAACGTTGCC  
ACAGCCCCGGTACGCGGCGCTGATGGCTCTGCACCTGTTACCCTCTTCACGCGCTGTGCTGAGTTGGTGG  
CTGCGTGTACACCCACTGGGGACGCTGCGACGTGCTAGTGAACAACGCCTCTTCTTTCTACCCACGCC  
GCTGCTGAGGAATGACGAGGATGGACACGAGCCCTGTGTGCGAGATAGAGAGGCAATGGAGACGGCCACC  
GCTGACCTCTTCGGCTCCAACGCGATAGCGCCCTACTTCTTGATTAAGGCGTTCGCGCATCGCTTCGCGG  
GCACCCAGCCAAGCATCGCGGCACCAACTACTCCATCATCAACATGGTTCGACGCCATGACGAACCAGCC  
TCTTCTCGGGTACACCATATATACCATGGCCAAAGGGGCGTTGGAGGGGCTGACACGGTCTGCCGCGCTG  
GAGCTTGCGCCGCTGCAGATTCGAGTGAACGGCGTTGGTCCGGGTTTGTGCGGTGCTCGTGCATGACATGC  
CCCCTGCTGTGTGGGAGGGCCACCGCAGCAAGGTGCCTCTGTACCAGCGCGATTCTCCGCGCGAGAGGT  
GAGCGACGTTGTTATCTTCTGTGCTCCTCCAAGGCCAAGTACATCACCGGCACCTGTGTCAAAGTGGAT  
GGTGGCTACAGCCTTACCCGGGCCTGA

>L12031 75, 677 YPT

ATGACCGCTGAGTACGACTACCTCTTCAAGCTGCTGCTGATCGGCGACACGGGTGTCGGTAAGTCTGCC  
TGCTCCTCCGCTTCGCCGATGACAGCTACACCGATAGCTACATCTCCACCATTGGTGTGCGACTTCAAGAT  
TCGCACGCTGAACCTGGAAAGCAAGTAATCAAGCTGCAGATTTGGGATACCGCCGGCCAGGAGCGCTTC  
CGCACCATCACGAGTAGCTACTACCGTGGTGGCCACGGCATCATCATAGTGTATGACACGACCGACATGG  
AGAGTTTCAACAACGTCAAGACGTGGCTAAGCGAAATCGAAAAGTACGCAAGCGAGAACGTCAACAAGAT  
CCTCGTCCGCAACAAGTGGGATTTGGTCACAAAGAAGGCCGTGACACACAGATGGCGAAAAGACTTTGCC  
GACTCTCTTGGCATCCCGTTCCTTCAAACGAGCGCCAAGAACTCCACAAAACGTGAGGAAGCCTTCATCC  
AAATGGCATCTGGAATCAAGGCGCGCTGGCCGTGAGCGGTGAGGCCAAATCGGCGGCCCGCCCAACCT  
GCAGAACCCCCAACGGTGAAGAAGGAAGACAGCTGCTGCTGA

>L14605\_1 1545, 3500 heat shock protein 70

ATGACGTTTCGACGGCGCCATCGGCATCGACCTGGGCACGACGTAATCGTGTGCGTGGGCGTGTGGCAGAACG  
ACCGCGTGAAATCATCGCGAACGATCAGGGCAACCGCACGACACCGTTCGTACGTTGCGTTCACGGACTC  
GGAGCGCTTGATCGGCGATGCCGAAAGAACCAGGTGGCCATGAACCCGCACAACACGGTGTTCGATGCC  
AAGCGCCTGATTGGTGCAGTTCACGACTCGGTTGTGCAGTTCGACATGAAGCACTGGCCGTTCAAGG  
TGACGACGAAGGGTGCAGACAAGCCCGTATTTCCGGTGCAGTACCGCGGCGAAGAGAAAACCTTCACGCC  
GGAGAAGATCAGCTCGATGGTGTGCTGAAGATGAAGGAGACGGCGGAGGGGTACCTGGGCAAGCAGGTG  
AAGAAGGCCGTGGTGCAGGTGCCGCGTACTTCAACGACTCGCAGCGCCAGGCCACGAAGGACGCCGGCA  
CGATTTCTGGGCTGGAGGTGTTGCGCATCATCAACGAGCCGACGGCGGCGGCCATCGCGTACGGCCTGGA  
CAAGGGCGACGACGGCAAGGAGCGCAACGTGCTGATCTTCGACCTTGGCGGCGGCACGTTTCGATGTGACG  
CTGCTGACCATCGACGGCGCATCTTCGAGGTGAAGGCGACGAACGGCGACACGCACCTTGGCGGCGAGG  
ACTTCGACAACCGCCTCGTCACGTTCTTCACCGAGGAGTTCAAGCGCAAGAACAAGGGCAAGAACCTGGC  
GTCGAGCCACCGCTCGCTGCGCCGTCTGCGCACGGCGTGCAGCGCGCGAAGCGCACGCTGTCGTCGCCG  
ACGCAGGCGACGATCGAGATCGACGCGCTGTTTCGATAACGTTGACTTCCAGGCCACCATCAACCGCGCGC  
GCTTCGAGGAGCTGTGCGGGGACCTGTTCCGCGACGATTCAGCCGGTGGAGCGCGTGTGTCAGGACGC  
AAAGATGGACAAGCGCTCCGTGCACGACGTGGTGTGTTGGGCGGGTCCACGCGCATCCGAAGGTGCAG  
TCCCTCGTGTGCGACTTCTTCGGCGGCAAGGAGCTGAACAAGAGCATCAACCCCGACGAGGCTGTGCGGT  
ACGGCGCTGCGGTGCAGGCCTTCATCCTGACGGGCGGCAAGAGCAAGCAGACGGAGGGCCTGCTGCTGCT  
GGACGTAACGCCGCTGACGCTGGGCATCGAGACGGCGGCGGCGGTGATGACGGCGCTGATCAAGCGCAAC  
ACAACGATCCCGACCAAGAAGAGCCAGATCTTCTCGACGTACGCGGACAACCAGCCCGGTGTGCACATCC  
AGGTCTTCGAGGGCGAGCGCGGATGACGAAGGACTGCCACCTGCTGGGCACGTTTCGACCTGTCCGGCAT

CCCGCCGGCGCCGCGGGCGTGCCGAGATCGAGGTGACGTTTCGACCTGGACGCAAACGGCATCCTGAAC  
GTGTCCGCGGAGGAGAAGGGCACCGGCAAGCGCAACCAGATCACCATCACCACGACAAGGGCCGTCTGA  
GCAAGGACGAGATCGAGCGCATGGTGAACGACGCAATGAAGTACGAGGGGACGACAAGGCGCAGGCCGA  
CCGCGTGGAGGCAAAGAACGGTCTGGGAACTACGCGTACTCGATGAAGAACACGCTCGGGGACTCGAAC  
GTGTCCGGCAAGCTGGACGACACCGACAAGTCGACACTGAACAAGGAGATCGAGGGCGGGCTGGAGTGGC  
TGAGCAGCAACCAGGAGGCAACGAAGGAGGAGTATGAGCACAAGCAGAAGGAGCTGGAGAACGTATGCAA  
CCCGATCATGACCAAGATGTACCAGAGCATGGGCGGTGGTGCGGGCGGCATGGCCGGTATGCCGGACATG  
AGCGGCATGAGCGGTGCGCGGCCCGCGGGCGGCCTCCTCCGGCCCCAAGGTCGAGGAGGTTCGAC

>L16952 679, 930 RPL37

ATGACGAAGGGTACCACCTCGATGGGTCAGCGCCACGGGCGCACGCACATCCTGTGCCGCCGTGTGGCC  
GCAACTCCTACCAGTTTCAAGTGGGAGCGGTGCGCCGCTGCGCCTACCCGCGTGCCAGCCGCCGTTCGTA  
CAACTGGTCCGTGAAGGCCATCAAGCGCCGCCGACCGGCACCGGCCGCTGCCGCTACCTGAAGGTGGTC  
AACCGCCGATTGCCAACCACTTCAAGACCCCAAGGCGTAA

>L16961 71, 1201 actin

ATGGCTGACAACGAGCAGAGCTCCATCGTCTGCGATAACGGTTCGGCATGGTGAAGGCCGGTCTCTCTG  
GCGATGACGCTCCTCGCCACGTTTTCCCTTCGATCGTGGGCCGCCGAAGAACATGCAGGCCATGATGGG  
GAGCGGAACAAGACGGTTTTATGTTGGCGACGAGGCGCAGTCAAGCGCGGGCTGCTGTGCTGAAGTAC  
CCGATCGAGCACGGAATTGTGACAACTGGGATGACATGGAGAAGATCTGGCACCATACCTTCTACAACG  
ACGTGCGGGTGAACCCCGAGCAGCACAACGTGCTGTTGACGGAAGCGCCGATGAACCCGAAGCAGAACC  
TGAGAAGATGACGCAAATCATGTTGAGACGTTCAATGTGCCGTGCTGTACATTGGAATTCAGGCTGTG  
CTGTCCCTGTATTCTCTGGCCGACCACCGGTATTGTGCTTATGCGGGCGATGGCGTGACGCACCCG  
TTCCAATCTACGAGGGCTACTCCCTGCCGACGCGGTGCGGGCTGTGGACATGGCTGGCCGGACCTGAC  
GGAGTACCTGATGAAGATCATGATGGAGACGGGTACGACGTTACGACGACCGCGGAGAAGGAGATTGTG  
CGCAACGTGAAGGAGCAGCTGTGCTACGTAGCGCTGGACTTTGAGGAGGAGATGACGAAACGCGCCAAGT  
CGGCGAACGAGGAGGGCTTTGAGCTGCCGACGGCAACGTGATGATGGTGGGCAATCAGCGTTCGGCTG  
CCCAGAGGTGCTGTTCAAGCCGTCGCTCATTGGTCTCGACGAGGCTCCCGGCTTCCCGGAGATGGTGTAC  
CAGTCCATCAATAAGTGTGACATTGATGTGCGGCGGAGCTGTACGGGAACATCGTGCTGTCCGGTGGCT  
CGACCATGTTCTCAACCTTCCGGAGCGCCTGGCGAAGGAGATCTCGAACCTGGCGCCGTGTCGATAAA  
GCCGAAGGTGGTTGCGCCCGGAGCGCAAATACAGCGTGTGGATCGGGCGCTCGATTTTGTGATCGCTG  
ACGACCTTCCAGACAATGTGGGTGAAGAAGAGCGAGTACGACGAGTCTGGCCCAAGCATCGTGACAACA  
AGTGCTTCTGA

>L25120 166, 1419 cPGK

ATGTCTCTCGTGCTGAAGAAGAGCATCGATGACGCCACCGTCAGGGACAAGAAGGTGCTCATCCGCGTGG  
ACTTCAACGTCCCCGTGAAGAACGGTAAGATCACGAATGACTTCCGCATTTCGCTCCGCCCTTCCGACGAT  
CCAAAAGGTGCTGAAGGAGGGCGGCTCCTGCATCCTGATGAGCCACCTTGGTCGGCCGAAGGGTGGGAGA  
ATGAGTGACCCAAGTCCGGAGAAGGGTGTGCGCGGGTACGAGGAGGCCGCCACGCTGCGCCGGTTGCTG  
CACGCATCAGCGAGCTGCTGGGCAGAAGGTGGAGTTTGACCCGACTGCCTGGACGCTGCGTCGTACGC  
GTCGAAGCTGAAGAACGCGGACGTGCTGTTGCTGGAGAACGTGCGTTTCTACGCGGAGGAGGGCAGCAAG  
AAGGAGGAGGAGCGGACGCGATGGCGAAGGTAAGTACTAGCGTTCGTACGGCGACGTGTATGTCAGTGACGCGT  
TTGGCACTGCGCACCGGACAGCGGACGATGACGGGCATCCCCAAGGTGCTGGGTGCGGGCTACGCCGG  
GTACCTGATGGAGAAGGAGATCAACTACTTCTCGGAGTGTGAAACAACCCGCGGGCCGCTGGTTGCG  
ATTGTGCGGGTGGCAAGGTCAGCGACAAGATCCAGCTGCTTGACAACATGCTGGGCCGATCAACTACC  
TTGTGATTGGTGGCGGATGGCGTACACGTTCCAGAAGGCGCAGGGCCGCAAGATCGGCATCTCGATGTG  
CGAGGAGGATAAGCTGGACCTTGCCAAGTCGCTGCTGAAGAAGGCGCAAGAGCGGAATGTGCAGGTGTTT  
CTGCCAGTTGACCAGTGTGCAACAAGGAATTTAAGGCCGCGGACTCGCCGCTGGTGACGGAGAGCGTGG

ACGTCCCGGACGGCTACATGGCGCTGGACATTGGCCCAAGGACGATCCACATGTACGAGGAAGTGATTGG  
CCGCTGCAAGAGCGCGATCTGGAACGGCCCGATGGGCGTGTTCGAGATGCCGTGCTACTCGAAGGGCACA  
TTTGCCGTTGCGAAGGCGATGGGGACTGGAACGCAGAAGAACGGGCTGATGAGCATCATCGGCGGTGGTG  
ACAGCGGAGCGCTGCGGAGCTGAGCGGCGAGGCGAAGAACATGTCGCATGTGTCCACCGGCGGCGGTGC  
GTCCCTGGAGCTGCTGGAGGGCAAGACGCTGCCTGGCGTCGCCATTCTGACGGACAGAGAATGA

>L25121 166, 1605 gPGK

ATGTCTCTCGTGCTGAAGAAGAGCATCGATGACGCCACCGTCAGGGACAAGAAGGTGCTCATCCGCGTGG  
ACTTCAACGTCCCCGTGAAGAACGGTAAGATCACGAATGACTTCCGCATTCCGCTCCGCCCTCCGACGAT  
CCAAAAGGTGCTGAAGGAGGGCGGCTCCTGCATCCTGATGAGCCACCTTGGTCCGCCGAAGGGTGGCAGA  
ATGAGTGACCCAAGTCCGGAGAAGGGTGTGCGCGGGTACGAGGAGGCCGCCACGCTGCGCCCGTTGCTG  
CACGCATCAGCGAGCTGCTGGGGCAGAAGGTGGAGTTTGACCCGACTGCCTGGACGCTGCGTTCGTACGC  
GTCGAAGCTGAAGAACCGGGACGTGCTGTTGCTGGAGAACGTGCGTTCCTACGCGGAGGAGGGCAGCAAG  
AAGGAGGAGGAGCGCGACGCGATGGCGAAGGTAAGCTGCTGACGGCGACGTGTATGTCAGTGACGCGT  
TTGGCACTGCGCACCGCGACAGCGGACGATGACGGGCATCCCCAAGGTGCTGGGTGCGGGCTACGCCGG  
GTACCTGATGGAGAAGGAGATCAACTACTTCTCGCGAGTGTGAACAACCCGCCGCGGCGGCTGGTTGCC  
ATTGTGCGGCGGTGCGAAGGTCAGCGACAAGATCCAGCTGCTTGACAACATGCTGGGCCGATCAACTACC  
TTGTGATTGGTGGCGGATGGCGTACACGTTCCAGAAGGCGCAGGGCCGCAAGATCGGCATCTCGATGTG  
CGAGGAGGATAAGCTGGACCTTGCCAAGTCGCTGCTGAAGAAGGCGCAAGAGCGGAATGTGCAGGTGTTT  
CTGCCAGTTGACCACGTGTGCAACAAGGAATTTAAGGCCGCGGACTCGCCGCTGGTGACGGAGAGCGTGG  
ACGTCCCGGACGGCTACATGGCGCTGGACATTGGCCCAAGGACGATCCACATGTACGAGGAAGTGATTGG  
CCGCTGCAAGAGCGCGATCTGGAACGGCCCGATGGGCGTGTTCGAGATGCCGTGCTACTCGAAGGGCACA  
TTTGCCGTTGCGAAGGCGATGGGGACTGGAACGCAGAAGAACGGGCTGATGAGCATCATCGGCGGTGGTG  
ACAGCGGAGCGCTGCGGAGCTGAGCGGCGAGGCGAAGAACATGTCGCATGTGTCCACCGGCGGCGGTGC  
GTCCCTGGAGCTGCTGGAGGGCAAGACGCTGCCTGGCGTCGCCATTCTGACGGACAAGGACGTGAAGGAG  
CGGGGAGCTTCGTGCAAGTTCGCTTTCCGGGTCCGGAGCCCGAGCAGGGAGGCTTGTCCGCTCCGTTGTG  
GGCATATCTTTGGCGGTGCCCTCCATCGTAAGAGAGATAGTTAAGATCGTTCGTCGCGCTGCTGATCGGCAT  
TTTTATTGGTCCCGCATGAGCACCAAGCTGATCCGGTAA

>L26252 206, 1099 fibrillarin

ATGCGCGGTGGCTTTTGACGTGGCGGTGGTGGTTCGCGGCGGCAGCCGTGGTGGTTCGCGGAGGCTTTGGCC  
GTGGCGGCGGTTCGCGGTGGAGCCGTGGCGGCGGTTCGCGGTGGAGGCCGTGGCGGCGGTTCGCGGTGGTGG  
CCGTGGCGGCGGTTCGCGGTGGTGGCGGTGCCAAGGTTATCGTGGAGCCACACATGCTGCATCCTGGCGTG  
TTCATTTCCAAGGCCAAGACCGACTCTCTTTGCACGCTGAACATGGTGCCTGATTTCCGTTTATGGCG  
AGAAGCGTATCGAGCTGGGTGCAACGCAGGGAGGTGATGATAAGAAGGAGTACCGTCTGTGGAACCCCTA  
CCGCTCGAAGCTGGCCTCCGCCATCTACGCTGGTGTGAGTAGCATTACATGGGTCCCGGCTCGAAGGTA  
CTGTATCTCGGCGGTGCAACGGGTACCACCGTCAGCCACGTGAGCGACCTTGTGGGTCCGAGGGCATGG  
TGTATGCTGTGGAGTTCTCGCACCGTGTAGGCCGATTTAGTGGAGATGTGGAAGCGCCGCCGATTGT  
GCCCATTTGTTGAGGATGCCCGTACCCCATGAAGTACCGCATGCTTGTGCCGATGGTGGATTGCATTTTC  
ATGGATGTGCGCCAGCCAGCCAGGCGCAATCTTGCACCTCAACGCACAGGCTTTTCTGCAGAACGGTG  
GTCACATATGTGATCTCTATCAAGGCTAACTGCATCGACTCTACCCTGGAGGCCCTGTAGTGATCGCGTC  
TGAGCTGAACAAGCTGAAGAAGGACAAGCTGAAGCCACTGGAGCAAGTGTCTCTTGAAGCGGTTGAGCGC  
GATCACGCTGTAGTTGTTGGCGTGTACCGCCCTGTCAAGAAGTCAAGCAATGA

>L26562 206, 1099 Leishmania major fibrillarin homologue, complete cds  
ATGCGCGGTGGCTTTTGACGTGGCGGTGGTGGTTCGCGGCGGCAGCCGTGGTGGTTCGCGGAGGCTTTGGCC  
GTGGCGGCGGTTCGCGGTGGAGCCGTGGCGGCGGTTCGCGGTGGAGGCCGTGGCGGCGGTTCGCGGTGGTGG  
CCGTGGCGGCGGTTCGCGGTGGTGGCGGTGCCAAGGTTATCGTGGAGCCACACATGCTGCATCCTGGCGTG

TTCATTTCCAAGGCCAAGACCGACTCTCTTTGCACGCTGAACATGGTGCCCGGTATTTCCGTTTATGGCG  
AGAAGCGTATCGAGCTGGGTGCAACGCAGGGAGGTGATGATAAGAAGGAGTACCGTCTGTGGAACCCCTA  
CCGCTCGAAGCTGGCCTCCGCCATCTACGCTGGTGTGAGTAGCATTACATGGGTCCCGGCTCGAAGGTA  
CTGTATCTCGGCGGTGCAACGGGTACCACCGTCAGCCACGTGAGCGACCTTGTGGGTCCGGAGGGCATGG  
TGTATGCTGTGGAGTTCTCGCACCGTGTAGGCCGCGATTTAGTGGAGATGTGGAAGCGCCGCCGATTGT  
GCCATTGTTGAGGATGCCCGTACCCCATGAAGTACCGCATGCTTGTGCCGATGGTGGATTGCATTTTC  
ATGGATGTCGCCAGCCAGACCAGGCGGAATTCTTGCACTCAACGCACAGGCTTTTTCTGCAGAACGGTG  
GTCATATGTGATCTCTATCAAGGCTAACTGCATCGACTCTACCCTGGAGGCCCTGTAGTGATCGCGTC  
TGAGCTGAACAAGCTGAAGAAGGACAAGCTGAAGCCACTGGAGCAAGTGTCTCTTGAGCCGTTTCGAGCGC  
GATCACGCTGTAGTTGTTGGCGTGTACCGCCCTGTCAAGAAGTCAAGCAATGA

>L28800 201, 734 hydrophilic surface protein

ATGGGAAGCTCTTGACGAAGGACTCCGCAAAGGAGCCCCAGAAAAGTGCGGATAAGATCAAGAGTACCA  
ATGAGACCAACCAGGGAGGGAATGCGAGTGGCTCCCGAAGAGCGCCGGCGGTCCGGCCAACGAATATGA  
CCCGAAGGATGATGGCTTACGCGCAACAACGAAGACCGTTGCCCGAAGGAGGATGGCCATGCGCCGAAG  
AACGATGACCATGCCCCGAAGGAGGATGGCCATGCGCCGAAGAACGATGACCATGCCCCGAAGGAGGATG  
GCCATGCGCCGAAGAACGATGACCATGCCCCGAAGGAGGATGGCCATGCGCCGAAGAACGATGACCATGC  
CCCGAAGGAGGATGGCCATGCGCCGAAGAACGATGACCATGCCCCGAAGGAGGATGGCCATGCGCCGAAG  
AACGACGGGGATGTGCAGAAGAAGAGCGAAGATGGAGACAACGTGGGAGAGGGAGGCAAGGGCAATGAGG  
ATGGTAACGATGATCAGCCGAAGGAGCACGCTGCCGGCAACTAG

>L31814 1, 457 beta-tubulin

CGAGGGCGCGGAGCTGATCGACTCCGTGCTTGATGTGTGCCGAAGGAGGGCGGAGTGCTGCGACTGCCTG  
CAGGGCTTCCAGCTGTCTCACTCCCTCGGCGGCGGCACGGGCTCCGGCATGGGCACGCTGCTCATTTC  
AGCTGCGCGAGGAGTACCCGGACCGGATCATGATGACCTTCTCCGTATCCCGTCCCCCGGTGTCGGA  
TACCGTTGTGGAGCCGTACAACACGACCCTCTCTGTGCACCAGCTCGTGGAGAACTCCGACGAGTCCATG  
TGCATCGACAACGAGGCGCTGTACGATATTTGCTTCCGCACGCTGAAGCTGACGACGCCGACGTTCCGGTG  
ACCTGAACCACCTCGTCGCCGCTGTGATGTCTGGCGTGACCTGCTGCCTGCGCTTCCCTGGCCAGCTGAA  
CTCTGACCTGCGCAAGCTTGCCGTGAACCTCGTGCCG

>L40331 106, 1251 Leishmania major silent information

regulator 2 homolog, complete

ATGACAGGGTCTCCGAGAGCGCCGCATCAGGAACATGCCCTCGGAGAGCCGACTGTGGAAGGGCTTGCGC  
GCTACATCAGGGAGAAGGATGTGCGGCGCATTCTCGTGCTCGTCCGAGCAGGGCCAGCGTAGCTGCCGG  
CATCCCAGACTTTTCGCTCATCTGACACCGGGATCTACGCCAAGCTCGGCAAGTACAACCTCGACGACCCG  
ACCGATGCCTTTTCGCTGACTCTTCTGCGCGAGAAGCCAGAGATATTCTACTCTATCGCACGGGAGCTGA  
ACTTGTGGCCTGGGCACTTTCAGCCCACCGCGGTGCATCACTTCATCCGACTGTTGCAAGACGAGGGCCG  
TCTTCTGCGCTGCTGCACGCAGAACATTGATGGTCTGGAGAAGGCAGCGGGCGTGTGCGCGGAGCTCCTG  
GTCGAGGGCGATGGGTCTTTCGCTGCCGCCGCTGCATCGAATGCCACACGCCATTACGATTGAGCAGA  
ACTACCTGGAGGCGATGAGCGGCACGGTGTCCCGCTGCTCTACATGCGGCGGCATTGTGAAGCCAAACGT  
CGTTTTCTTTGGTGAATAATTTGCCGGACGCGTCTTTCGACGCGCTGCACCACGACGCCCGATCGCGGAG  
CTGGTCATCATCATCGGGACATCGATGCAGGTGCACCCGTTTCGCGTTACTGCCGTGCGTGTGCCAAAGT  
CCATCCCGCGGTTCTCATGAACCGGAGCGAGTTGGCGGCCTCCTCTTCCGCTTTCCTGATGACCCGCT  
CGACACCATCCACGACGATGCGGTTGCCAAGGAGGGACGCTCGTCCTCTTCGACAGAGCCGTTCCCGTCC  
GCGTCGGCGCGGCGGAGGAGGGGGACGGAGGACGGCTCCTCGTCGCCGAACGAGGAGGTCGAAGACG  
CGTCGACGTCCAGTTTCGAGTGACGGCTACGGTACGTTGACTACTACGCCACCCCGATGCTGCGG  
GGATGTTTTCTTCCGCGGCGACTGCCAGGAGAACGTGCTGAAGCTGGCCGAGTGCCCTGGGCCTCAGGGAG  
GCGCTGGCCAAGCGATGCGTCTTCCGGTGGCGCACAGCTACGGCACGAAAGACGTGCAATGAGACGCTG

AGTCTGAATTGCTGCCAACATGGTGAAGAGAGTTCATGAAGGCCGTAGGCAGAGCAGCTGAGCGCA  
TCGAAGGGGTCACACGCACCGCGCGTAGCCTCGCCTCGAATCATTTCAGCGCTGTCGTTTCCTTCTACG  
CATG

>L43630 29, 1186 surface antigen 2

ATGGCGCAGTGCCTGCGTTCGGTGGTGGTGGCGGCGACGCTCGCCGCTGCGGTGGCGCTGCTGCTGTGCA  
CGAGCAGTGCCTGGTGGCGCGTGTGCTGGGACGGGCGACTTCACTGCGGCGCAGCGGACGAACACGCT  
GGCGGTGCTGCAGGCGTTTGGGCGTGCATCCCTAAGCTTGGGGAGAAGTGGGCGGGCAACGACTTCTGC  
TCGTGGGAGGCCGTCTTGTGCAATGCGCCGACGTGTACGTGTGCGGAATCAGTCCGACGTATGCCGGCA  
CGCTGCCGGAGATGCCTGTGAACGTCGACTACAGGCACGTGCTGATCAAGCAGCTCGACTTTTCCGAAAT  
GGGGCCGGGGCTGAGCGGGACGCTGCCCGCCTCATGGCACTCGATGACATCTTTGGAGTCTTGTGCGATT  
GAAAAGTGTGAAAGCATCTCCGGCAGTGTGCCCCCGAGTGGGGCTCGATGACATCGCTGAGTGTCTCA  
ATCTGCGGGGCACAGGCATCTCCGGCACGCTGCCGCCCCAGTGGAGTGGGATGTGCAAGGCCCGGTCCCT  
GCAGCTGCAGGACTGCGACCTGTCCGGAAGTCTGCCCTCTTCGTGGTCTGCGATAACCGATGCTGGCTTCC  
GTCTCTCTAAGGGAAACAAGTTCTGCGGGTGTGTGCCGACTCGTGGGATCAGAAGGCTGGTCTTGTG  
TGGACATCGAGGACAAGCACAAGGCGAGCGACTGCTTGGCTGCTAAGGACTGCACAACGACCACCACTAA  
GCCCTCCGCCACGACAGCGACCACCCCGAACCTCACTAACTTTCCCCCTACGCCGAGGACCACGACTGAG  
CCGCTTACCACAACCAGCACTGAGGCACCGGCTGAACCCACAACCACCACTGAGGCACCGGCTGAACCCA  
CGACCACTGCTACCCCAACAAACACGCCGACTCCTGCACCAGAGACGGAGTGCAGGTTGGATGGGTGTGA  
GGTGTGCGAGGGGACTCCGCTGCGAGGTGCGCGAGGTGCCGTGAGGACTACTTCCCTGACGGACGAGAAG  
ACGTGCCTGAAGCACAACGATGGCGGTGTTGCTGCTGTGTCGAGCGGAGTGGCAGCAGCAGCTGTTGTG  
GCGTGGCTGTGCTGTTACGCGTGGGGCTGGCGCGTGA

>L76742 99, 905 dut

ATGAAGCGCGCTCGCAGCGCCAATATTCCAGGTGCGATTCTGCACTCCTTGGCAGAGCTGCAGGATGGCC  
TGAACGCGATGATCGACCCTTCCCTGGCGCGCTGTTGCTCGCTGGACAATTGGGCTCTAGCCATCAGAT  
GGAGTGCAGCGGAGCTGCTGGACTCCTATCCGTGGAAGTGGTGAAGAACCTCAACGCTACGCCCTGATTTG  
GCCAACGTTAGGATTGAACTGGTGCACATCTTTCACTTTTCCCTTTCCGGGCGCTATGCAAAATGCGGTCTA  
CCCCGACGATGAGATTCCCGCCGCTTCGCTCAAGCCTCTGAAGGAGGTCATGACAACCTTTTCTGCCGGC  
TAAGGAGTGCACGAGCGACCCTTACGGCTTTGTGTTCTTTCCCTCACCGATACACAGAACGCCATTGCG  
AGCTTTTCGTAACATCATTACGCTCGCAAACGCCTATCGCTTCGATGTCATCATAGAGTGCATCATATACG  
CCGCTGAGGACCTGGGGTTAACTTGGTGGCGTACTATATTGCAAAACACACTCTGAACTGCATTGCCA  
GCTGAGTGGCTACAAAGACGGCTCTTACGTGAAGGTGAACAATGGTGTGAGGACAATCACTTCTGCAC  
AACTGCATCAAAGACGTATCCCTCGATGAAGTCTCGACGCTGACAAGTATGTCCAGGCGTGAACAGCA  
TCATGGCTAACGTTTACGAAGCTTTCCAGATTAAGGAGTCTGACCGAAAGGATGCGGAGCGCTGGTTTGC  
CCTCGCAAAGGAAAATCGGCTGGCGATCAAGGCATA

>M12734 121, 1683 Leishmania major bifunctional  
dihydrofolate reductase-thymidylate

ATGTCCAGGGCAGCTGCGAGGTTTAAAGATTCCGATGCCGGAGACGAAGGCAGACTTTGCTTTCCCTCCC  
TGCGCGCTTCTCCATCGTCGTGGCCCTCGATATGCAGCACGGCATCGGCGACGGCGAGTGCATCCCGTG  
GCGGGTGCCTGGAGGACATGACGTTTTTCAAGAACCAGACGACGCTGCTGCGCAACAAGAAGCCGCGACG  
GAGAAGAAGCGCAACGCCGTCGTGATGGGCCGAAGACTTGGGAGAGCGTCCCGGTAAGTTCGACCAC  
TCAAGGGACGGCTGAACATCGTGTATCCTCGAAGGCCACCGTCGAGGAGCTTCTGGCGCCGCTGCCGGA  
GGGACAGCGCGCGGCGGCGGCGCAGGATGTGGTGGTGGTGAACGGCGGTCTGGCCGAGGCGCTCCGCCTC  
CTCGCACGCCGCTGTAAGTGCAGCTCCATCGAGACAGCGTATTGCGTCCGGTGGTGCAGGTTTACGCGG  
ACGCCATGCTGTGCGCGTGCATCGAGAACTGCAGGAAGTGTACCTGACCCGCATCTACGGCAGGGCGCC  
TGCGTGTACGCGCTTCTTCCGTTTCCGCCGAGAACGCGGCCACGGCGTGGGACCTGGCGTCTCTCAG

GGACGCCGCAAGAGCGAGGCGGAGGGCCTCGAGTTCGAGATCTGCAAGTACGTGCCGCGCAACCACGAGG  
AGCGGCAGTACCTTGAGCTGATTGACCGCATCATGAAGACGGGGATCGTGAAGGAGGACCGCACCGGCGT  
GGGCACCATCAGCCTCTTCGGCGCCAGATGCGCTTCTCCCTACGCGACAACCGCCTGCCGCTGCTGACG  
ACGAAGCGTGTCTTCTGGCGCGGCGTGTGCGAGGAGCTGCTGTGGTTCCCTGCGCGGGGAGACGAGTGGCG  
AGCTGCTGGCAGACAAGGACATTCACATCTGGGACGGCAACGGTTCGCGCGAGTTTCTCGACAGCCGCGG  
CTTGACAGAGAATAAGGAGATGGACCTCGGCCCTGTCTACGGCTTCCAGTGGCGCCACTTCGGGGCAGAT  
TACAAGGGGTTTGAAGCGAACTACGACGGCGAAGGGGTGGACCAGATCAAGCTCATCGTGGAGACCATCA  
AGACGAACCCGAACGACCGCCGCTCCTAGTCACTGCCTGGAACCCGTGCGCGCTGCAAAAGATGGCGCT  
GCCGCCGTGCCACTTGCTTGCTCAGTTCACGTGAACACAGACACGAGCGAGCTATCCTGCATGTTGTAC  
CAGCGCTCGTGTGACATGGGTCTTGCGCTCCCTTCAACATTGCCTCCTACGCGCTGCTACCATCCTCA  
TTGCCAAGGGCAGCGGTCTGCGGCCGTGAGCTTGTGCACACCCTCGGCGACGCCACGTCTACCGCAA  
CCACGTTGATGCCCTCAAGGGCAGCTCGAGCGAGTCCCGCACGCGTTCCCGACCCTCATCTTCAAGGAG  
GAGCGGCAGTACCTCGAGGACTACGAGTTGACGGACATGGAGGTGATCGACTACGTTCCACACCCGGCGA  
TCAAGATGGAGATGGCCGTATAGAGAGAGGGAGGGTGTATGTGCGTTGTATGCATGCAGCCACCGCCGC  
GACGCTGCCACTCACCTGGCTCCACCTCCTCGTCGCACGACGACCGCCCTTGGCGAGACTCGTTGGGT  
AACCATGAGCGGCGCGGAGGGGTACGCGCCTGCGTTTTTCTCGCACATGGCTGCGGCTGATATCCCGCCCG  
CACCCGCGCGGCTCAGGCCGCGTGTGCTGCTGCTCTTTCCATTTTTTTTTTTGTGTGTTGGTGGTATTG  
AGCTGCTCTCCGTTGTGTGCTGGGACCCTCCTTCCCTCGATCTCCTCGTGGGGTCTCCGACGCGCAG  
ACGCGGTGCGTGCAGCGTGCACGTGCTGTGCGCGTGGCTGTAGTTGCGAGCGGAGAGAGAGAGAGGG  
AGGGAGGGAGGGCAGAGGGCAGAGGACATGCGGGTGGGAACGTGCACCGGCCTCGTCTCACGCAGCTGGA  
GCCCACGAATGCCACCACCACCCCTTCTTCCCCCCCCCTCCTCTTCTTCCCACGGCGGGCAGCAGCAG  
GGGGCTCAGCTCACGCTTCTGTAGGGTATTATATTAAGCACATGTGCGTGCTGTGCTTCCGGTCTTGT  
TGGTGGTGGTTCGCTTCAAGTCCACGACTCCTGCCGTTGCTCACCGCCGGGCTGTCTTCTTCGCCCT  
CCCTCGGTGCCTCTTCCGCCCGCGCACGCGTTGCGCTTGATCACGCGTCTTGGGTGATGTGCCGTGTGT  
ATACACACCGTGCACGGAGAGAGCGAGCGAGAGAGAGAGAGAGGGCGAGAGGAAGAATGGCCGGTGCC  
TCGCGTGGGCAAGCGTGCAGGAGTTTGTGCTGCTGCGCCGCGTGGATGTGCGCAGCGCAAGACCCC  
GTGCGCCTGAAACGTGAAGGGAGGTCGAGAAGCGTGCCGCATGAGGCCTTAAGGCAGGAAAGTGAAGA

>M28690 1, 906 ND1

GACATTTTAGTTGTTCTTGTCTTGACCGGCTTTGTAAGTCTTTGTGAAAGAAGAATTTAGCTTTAGTTC  
AAATACGAATAGGTCCGGCCCTTTGTTTTTTTGAATTTTAAACCAATAACTGACGGAATAAACTTTT  
TATTAATTTATCATTTTTGTAATTAGTTTTGAAATCATTTACTTAATAGGTGCAATCTTAATTACTACA  
TGCTGCATTTTTATTGGTTGGTTTTATTTTCCCTATAGTTTTATACTGTTATTAGACACAGGATTCATA  
TTACAATAATGATGTGCGTACATGTTTTAGTAATATGTTTAGCACATTTTTTGTAGGTTGCTTTTTATT  
CTCTAGTTGCTTTGTATATCTTTCTGCAATGCGCACTATGTTTTTTAGTATTATTTCTGAAAGTGGCTTA  
TTTTTATTATACAACTGTATATTCGTTAGACTACTTTAGCTTTTTTTTGCATTAAGACATTTGTGTTG  
GGCAGATTTATATTACAACTTTTATATTGCCGGCATCTTATTTGTATGTATATTTGAATAAGTATGCT  
TCTAGACGGATTAATAACTACCATTCGACTATATGGAATGTGAAAGTGAATTAGTCGCTGGGTTGATTACA  
GAACTATCAGGATTCTTTTTATATTATATCCGTTCTTGAAATAAATCATGTGTTACTGACAACATTAT  
TATTAGCCAGTCTCTGTTTTGGGGGCTTATTTATATGTTTTAAAGCTATAATTATCTTAATTATTGGGTT  
TTTTTATCCAAGGGTAATTGGTTATAGACTAAAAATTACAACAGCGCAAGCATTATACTTATTTTTTTA  
TTCTACATGTGCGTCTTACTTTTATTTGACTGTTCACTACAAAATAATTGCTATATTATTTAA

>M36675 710, 2257 heat shock protein 70

ATGACATTCGACGGCGCCATCGGCATCGACCTGGGCACGACGTACTIONCGTGGGTAGGCGTGTGGCAGAACG  
AACGCCTGGATATCATCGGAACGACCAGGTAACCGCACGACCCGTCGTACGTTGCGTTCACGGACTC

GGAGCGGCTGATCGGCGATGCTGCAAAGAACCAGGTGGCAATGAACCCGCACAACACGGTGTTCGACGGC  
AAGCGCCTGATTGGCCGCAAGTTCAACGACTCGGTTGTGCAGTCGGACATGAAGCACTGGCCGTTCAAGG  
TGACGACGAAGGGTGACGACAAGCCCGTGATTTCCGGTGCAGTACCGCGGCGAGGAGAAGACCTTCACGCC  
GGAGGAGATCAGCTCGATGGTGCTGCTGAAGATGAAGGAGACGGCGGAGGGCTACCTGGGCAAGCAGGTG  
AAGAAGGCCGTGGTGACGGTGCCGGCGTACTTCAACGACTCGCAGCGCCAGGCAACGAAGGACGCCGGCA  
CGATTGCTGGCCTGGAGGTCGTGCGCATCATCAACGAGCCGACGGCAGCGGCCATCGCGTACGGTCTGGA  
CAAGGGTGACGACGGCAAGGAGCGCAACGTGCTGATCTTCGACCTTGGCGGGCGGCACGTTTGATGTGACG  
CTGCTGACGATCGACCGCGCATCTTCGAGGTGAAGGCGACGAACGGCGATACACACCTTGGCGGGGAGG  
ACTTCGACAACCGCCTCGTCACGTTCTTCACCGAGGAGTTCAAGCGCAAGAACAAGGGTAAGAACCTGGC  
GTCGAGCCACCGCGCGCTGCGCCGTCTGCGCACGGCGTGCGAGCGCGGAAGCGCACGCTGTCGTCCGCG  
ACGCAGGCGACGATCGAGATCGACGCGCTGTTTCGAGAACATTGACTTCCAGGCCACCATCACCCGCGCGC  
GCTTCGAGGAGCTGTGCGGGGACCTGTTCCGCGACGATCCAGCCGGTGGAGCGCGTGCTGCAGGACGC  
GAAGATGGACAAGCGCTCCGTGCACGACGTGGTGTGGTGGGCGGGTCAACCGCGCATCCGAAGGTGCAG  
TCCCTCGTGTGCGACTTCTTCGGCGGCAAGGAGCTGAACAAGAGCATCAACCCGACGAGGCTGTCCGCT  
ACGGCGCTGCGGTGCAGGCCCTTATCCTGACGGGCGGCAAGAGCAAGCAGACGGAGGGCCTGCTGCTGCT  
GGACGTGACGCCGCTGACGCTGGGCATCGAGACGGCCGGCGGCGTGATGACGGCGCTGATCAAGCGCAAC  
ACGACGATCCCGACCAAGAAGAGCCAGATCTTCTCGACGTACGCGGACAACCAGCCCGGCGTGACATCC  
AGGTCTTCGAGGGCGAGCGCGGATGACGAAGACTGCCACCTGCTGGGCACGTTTCGACCTGTCCGGCAT  
CCCGCCGGCGCCGCGGGGTACCGCAGATCGAGGTGACGTTTCGACCTGGACGAAAACGGCATCCTGAAC  
GTGTCCGCGGAGGAGAAGGGCACCGGCAAGCGCAACCAGATCACCATCACCAACGACAAGGGCCGGCTGA  
GCAAGGAC

>M63109 1, 704 GP 96-92

AGTGCCAAGCTTGGCTGCAGGTCGACGGATCCTGGAGCCCGTCAGTATCGGCGGGCGAGGAGGAGAGAA  
GCAGCGCATCGAGATGGTGCGCAAGCAGCGTGAGGAGGCTCAAAAAGAAGCGCGAGGAGATCCAGAAGCAG  
CGCGAGGAGGAGATCAAGCGCCGCAAGGCTGAGATCGAGGCAGAGAGGCAGAAGCTGAAGGAGCTGCAGG  
AGGAGCACGAGAGGGAGCAGGAGGAGGCCCGCAGCCGTGCGCTCGCGGAGGAGAAGGAGGCACAGAAGAA  
GGCCGAGAAGAAGGCCGAGGAGGCCGAAGACGAGCTTGTGCGACGCGCCGGCAGAGGAAGGGGGAGTTG  
GAGGAGCTGCAGCGCCACGCGGAGAAGGAGGAGAAGCAGCGCATCGAGATGGTGCGCAAGCAGCGTGAGG  
AGGCTCAAAAAGAAGCGCGAGGAGATCCAGAAGCAGCGGAGGAGGAGATCAAGCGCCGAAGGCTGAGAT  
CGAGGCAGAGAGGCAGAAGCTGAAGGAGCTGCAGGAGGAGCACGAGAGGGAGCAGGAGGAGGCCCGCCAG  
CGTTCGCTCGCGGAGGAGAAGGAGGCACAGAAGAAGGCCGAGAAGAAGGCCGAGGAGGCCGAAGACGAGC  
TTGCTGCGACGCGCCGGCAGAGGAAGGGGGAGTTGGAGGAGCTGCAGGCCAGCGCGAGGAGGAGGCGGA  
ATTC

>M64672 201, 620 f11.1

ATGATCATCCGCTATATGTGCGAGGGTACTTCCCTCCTTTCCCAAGGCCTGCACCATGGGTACGGTGGCG  
TCTCGTCTATCCGTAGCGCAGTATTGGAGGAACTCCATCTGCTCTGTATGGAGGGGGCAGCGTGGTGCA  
CATGTCTCCATCTTTTGTGCTTGCCTCTGCGATTTTGTGCGGTGGCGTGTATGTGGGCATACAAACCAC  
ACACGCCGTGCCCGGACCTGCCTGGTGAGAATTTGCCATGCACTGGTCGCCGTTGACTTTTTTGTGTGT  
ATTTTGTCTTCTCTCGTTTTTTCGCGCTCTCTCTCGTGTAGAGATCGCTGTATTGCCTTCTGTGTTTGC  
TTTTTCTTGATGCCCGTTGTTTGTGCGTCACTCCCTCCTCTGCCCCACAGTCCCTTCGCCGTTCTCTGTGA

>M94390 592, 1407 HEXBP

ATGTCCGAAACCGAAGACGTCAAGCGTCCGCGCACCGAGAGCAGCACCAGCTGCCGCAATTGCGGTAAGG  
AGGGCCACTACGCCCGGAGTGCCCCGAGGCCGACTCCAAGGGTGACGAGCGCAGCACGACGTGCTTCCG  
CTGCGGCGAGGAGGGCCACATGAGCCGCGAGTGCCCGAACGAGGCCAGGTCCGGCGCAGCTGGTGTATG



ACGTGCTTCCGCTGCGGCGAGGCCGGCCACATGAGCCGTGACTGCCCCAACTCCGCGAAGCCGGGTGCGG  
CCAAGGGCTTCGAGTGCTACAAGTGCAGGTCAGGAGGGTCATCTCAGCCGTGACTGCCCCAGCAGCCAGGG  
TGGAAGCCGCGGTGGATACGGCCAGAAGCGCGGCCGCAGCGGCGCACAGGGCGGCTACAGTGGCGATCGC  
ACGTGCTACAAGTGCAGGTCAGCCGGCCACATCAGCCGTGACTGCCCCAACGGTCAGGGCGGGTACAGCG  
GCGCGGGTGACCCGCACATGCTACAAGTGCAGGTCAGCCGGCCACATCAGCCGTGACTGCCCCAACGGTCA  
GGGCGGGTACAGCGGCGGGTGACCGCAAGTGTACAAGTGCAGGCGAGTCGGGCCACATGAGCCGCGAA  
TGCCCCAGCGCCGGAGCACTGGCAGCGGTGACCGCGCATGCTACAAGTGCAGGCAAGCCTGGCCACATCA  
GCCGCGAGTGCCCGGAGCCGGTGGCAGCTATGGCGGTTCCCGCGGCGGGTGACCGCACGTGCTACAA  
GTGCGGCGAGGCCGGCCACATCAGCCGTGACTGCCCCAGCAGCTAA

>U01031 1, 318 histone H-1 like protein

ATGTCCTTAATTCCGCCGTGCTGCCGTTTCCGCCGCCACGACCTCGCCGAGAAGTCTTCTCGCTCGT  
CGCCGAAGAGGGCGGCCGTGGGCAAGAAGACCGGCGCAAGAAGGTTGCGAAGAAGACCTTCGCGAAGAA  
GGTTGCGAAGAAGCCAGCGAAGAAGTTGTGAAGAAGCCAGCGAAGAAGTTGTGAAGAAGCCAGCGAAG  
AAGGTTGTGAAGAAGGCTGTGAAGGCTGTGAAGAAGGCTGTGAAGAAGGTTGTGAAGGCTGTGAAGACC  
CGAAGAAGTCGTGAAGAAATCCTCGGCGAAGAAGTAA

>U16999 73, 639 L-11

ATGGTCGCGGAGAGCAAGGCTGCGAACCCCATGCGGGAGATCGTTCGTGAAGAAGCTCTGCATCAACATTT  
GCGTTGGTGAGAGCGGTGATCGCCTGACGCGTGCCTCGAAGGTGCTCGAGCAGCTGTGCGAGCAGACCCC  
GGTGCTCTCCCGGCTCGTCTGACCGTGCGCACGTTCCGGCATCCGTCGTAACGAGAAGATCGCCGTGCAC  
TGCACCGTCCCGGCAAGAAGGCCGAGGAGCTGCTGGAGAAGGGCCTCAAGGTGAAGGAGTTCGAGCTGA  
AGAGCTACAACCTTCGCGACACCGGCTCCTTCGGCTTCGGCATCGACGAGCACATTGATCTCGGCATCAA  
GTACGACCCCTCCACCGGTATCTACGGCATGGACTTCTACGTCGTCCTCGGCCCGGCTGGTGAGCGAGTG  
GCGCACCGCAAGCGCAAGTGCAGCCGCTCGGCCACTCCCACCACGTCACCAAGGAGGAGGCGATGAAGT  
GGTTCGAGAAAGTCCACGACGGTATCATCTTCCAGGCCAAGAAGAAGAAGATGATCCGCCGCCGCCG  
TCGCTAA

>U27568 72, 1010 LACK

ATGAACTACGAGGGTCACCTGAAGGGTCACCGAGGATGGGTACCTCCCTGGCCTGCCCGCAGCAGCGCG  
GGTTCGTACATCAAGGTGGTGTGACGTCGCGGATGGTACGGTCATCTCGTGGAAGGCCAACCCCGACCG  
CCACAGCGTGACAGCGACTACGGTCTGCCGAACCACCGCCTCGAGGGCCACACCGGCTTCGTGTGCTGC  
GTGTGCTGGCCACGCCACCGACTACGCGTGACCGGTCCTGGGACCGCTCCATCCGCATGTGGGACC  
TGCGCAATGGCCAGTGCCAGCGCAAGTTCCTGAAGCACACCAAGGACGTGCTCGCCGTGCGCTTCTCGCC  
GGACGACCGCCTGATCGTGTCCGCGGGCCGCGACAACGTGATCCGCGTGTGGAACGTGGCGGGTGAGTGC  
ATGCACGAGTTCCTGCGGACGCGCCACGAGGACTGGGTGAGCAGCATCTGCTTCTCGCCGTGCTGGAGC  
ACCCGATCGTGGTGTCCGGCAGCTGGGACAACACCATCAAAGTATGGAACGTGAACGGGGGCAAGTGTGA  
GCGCACGCTCAAGGGCCACAGCAACTACGTGTCCACGGTGACGGTGTGCGCCAGACGGGTCTCTGTGCGCA  
TCTGGCGGCAAGGACGGCGCGGCGCTGTTGTGGACCTGAGCACCGGTGAGCAGCTGTTCAAGATCAACG  
TGGAGTCGCCCATCAACCAGATCGGCTTCTCGCCAAACCGCTTCTGGATGTGCGTCGCGACGGAGAGGTC  
TCTGTCCGTGTACGACCTGGAGAGCAAGCCGTGATTGCGGAGCTGACGCCGACGGCGGAAAGCCGTCG  
GAGTGCATCTCCATTGCCGTGGTCCGCCGACGGCAACACTCTGTACTCCGGCCACAAGGACAACCTGATCC  
GCGTGTGGTCCATCTCCGACGCCGAGTAA

>U29952 377, 715 infective insect stage-specific protein

ATGGAGATGAAAACTTGCTTGGAAGCACAAGATTGTGTCCGTCAACGGCAAGCCTGCACCGCGGGTG  
TGACGGTGGAGTTCAAGGCCAGCGGAGAACAGCGGATCCGTTTACATGCACGCGAAAAGTGGCGAACATCAT  
GAACGGCCCGTTGAAGCTCGCAAACCGCAAGCTCTCTGGTGTCTTGTGTCAACGATGATGTTGGGCAGC  
GACGACCTGATGAATATCGAGAACGCCCTCAGTCAGGGATTTCATGGAGGGCATGACATACCGGTGAAGG

ACGGCGGCAAGTTGACGCTGCAGTCTAAAACACATATCATCATGCTTGTTCCTGCGTAG

>U30455 292, 1536 squalene synthase

ATGGGGTTCTTCTCGGATTCGGTAGCGATGATGCGTGTAAGTGGCAGATGCGCTCTGTGAAGATTCAGG  
TGCCGCCGGAAGAGACGGACTTACGCTTCTGCTACGATATCATGAACGACGTCTCTCGTTCCCTTCGCGGT  
TGTCGTGGCGCAGCTCGCAGACCAGCAGCTCCGTGATGCCATCTGCATCTTCTACCTTGTCTCCGTGCG  
CTGGATACCTTGGAGGATGACATGAGCGTTCCGGTAGACGTTAAGCTGAAGGAGCTTCCGAAGTCCACA  
CGCACACGAGCGACATGAGCTGGTGCATGAGCGGCGTCCGGTGAAGGACGCGAGCGGAACTGCTGGCGAA  
ATACCCGTGCGTCTCGCGGAATTCAAGAAGCTGAAGAAGGAGTATCAGGACGTCATCGCAAATATCTGC  
GAGCGCATGGCAAACGGCATGTGCGAGTTCTTGAAGCGCCAGTGGTCACAAAGGACGACTACAACCAGT  
ACTGCCACTATGTGCGCGCCTCGTCCGCCACGGCCTCACCCAGCTCTTCCGCCGCTGCGGCTTCGAGGA  
CCCGAGCCTGGACGACGATCTCACCAGTTCCAACCACATGGGTCTCTTCCCTGCAGAAGACAAAACATCATC  
CGCGACTACTACGAGGACATCCGAGAGGAGCCGCCGCGGATGTTCTGGCCGAAGGAGATCTGGGGCACGT  
ACGTGACGGAGCTGAAGGAGCTGAAAAGTGAGTCGAACAATGCGGCAGCGGTGCAGTGCCTGAACGCCAT  
GGTGGCCGACGCTCTCGTGCATGTCCCCTACATCGTGGACTACCTCTCCGCTCTGCGCGACCCGTCCGTG  
TTCCGTTTTTTCGCCATTCTCAGGTGATGGCCATTGCGAGCGTGAAAGAGGTGTACAACAACCCCGACA  
CGTTCCAGGTCAAGGTGAAGGTGTCACGGCCGAGTCTGCGGATCATGCTCAAGGCCAGACCCTCTA  
CAGCTCCCTCAGCATCGTTCGCGACTACTGCGTGGAGCTGCAGGAGAAGCTAGACATGCAAGACGCAGC  
TCCGTATCGATCGGCAACTCGCTTTCGCGCGCGATTGAGCGGATCGACCTGCAGCTGAAGAAGTGCCAGG  
ACGTCTCTACACCCGACGCTCCTCGCCGCTACCCAGGCCTCGGTGGTCAGTTCCTTCTCACCCGTAT  
GGATACCGTCCGTGGTTTCTTTGGTGGCCGCAAGGAGATTGCCGGCCACGCGTAA

>U43705 1, 1023 cathepsin B-like protease

ATGGCCCTCCGCGCAAGTCTGCGCTGTGCCTGGTGGCCGTGTTCCGCCCTGCTGCTGGCCACCACGGTGA  
GCGGCCTCTACGCCAAGCCGAGTGACTTTCCGCTTCTCGCAAGAGTTTTGTGGCGGAGGTCAACTCAA  
GGCGAAGGGTCAGTGGACCGCCTCGGCCAATAATGGCTACCTGGTACCGGGCAAGAGCCTCGGGGAGGTG  
CGCAAGCTGATGGGTGTGACCGACATGAGCACCGAGGCTGTCCCTCCCCGCAACTTCTCTGTGGAGAAC  
TGCAGCAAGACCTACCAGAAATTTTTGACGCCCGGAGCATTGGCCCATGTGCTTGACGATCAGCGAGAT  
TCGTGACCAATCGAACTGCGGCTCGTGTGGCCATCGCGGCGGTGGAGGCTATTTTCGACCGCTACTGC  
ACCTTCGGTGGCGTTCCGGATCGCCGATGTCGACCAGCAACCTTCTCTCCTGCTGCTTCATATGCGGCC  
TTGGCTGCCACGGCGGCAATCCGACGGTAGCGTGGCTATGGTGGGTGTGGGTAGGCATAGCGACTGAGGA  
CTGCCAGCCCTACCCCTTTGACCCATGCAGCCATCACGGGAACAGCGAGAAGTACCCGCCCTGCCGAGC  
ACCATCTACGATAACCCCTAAATGCAATACCACCTGTGAGAGAAACGAGATGGATCTGGTCAAGTACAAGG  
GCAGCACATCTTACTCCGTCAAGGGCGAGAAGGAGCTCATGATTGAGCTCATGACCAACGGCCCCTTGA  
GTTGACCATGCAGGTGACTCTGACTTCGTCCGCTACAAGAGTGGTGTCTATAAGCACGTCTTGGTGTAT  
TTTCTCGGCGGACACGCTGTAAAACCTGGTCCGTTGGGGAACCCAAGACGGTGTCCCGTACTGGAAGGTTG  
CCAACAGCTGGAACACCGACTGGGGTGACAAAGGCTACTTCTTGATCCAGCGCGGCAACAATGAGTGCAA  
AATTGAGAGTGGCGGCTTGTGGCATAACCCGCGCAGGAGTAG

>U43706 1, 1332 cathepsin L-like protease

ATGGCGACGTCGAGGGCCGCTCTCTGCGCTGTTGCGGTTGTGTGCGTGGTGTCTGCGGTTGCCTGCGCGC  
CCGCGCGCGCGATATACGTGGGCACGCCGGCTGCTGCGCTGTTTCGAGGAGTTCAAGCGGACGTACCAGCG  
CGCGTACGGGACGCTGACCGAGGAGCAGCAGCGGCTGGCGAACTTCGAGCGCAACCTGGAGCTGATGCGC  
GAGCATCAGGCGAGGAACCCACACGCGAGGTTCCGGATCACGAAGTTCTTTGACCTGTGCGAGGCGGAGT  
TCGCCGCGCGCTACCTGAACGGCGCCGCTACTTCGCAGCGGCGAAGCAGCACGCCGGCCAGCACTACCG  
CAAGGCGCGCGGACCTGTGCGGCGTGCCTGATGCGGTGGACTGGCGCGAGAAGGGCGCCGTGACGCCG  
GTGAAGAATCAGGGTGCCTGCGGGTCTGTGCTGGGCGTTCTCGGCGGTCCGCAACATCGAGTCCGAGTGGG  
CCGTTGCCGCCACAAGCTGGTGGGCTGTGCGAGCAGCAGCTGGTGGAGCTGCGATCACGTGGACAATGG

TTGCGGCGGCGGGCTGATGTTGCAGGCATTCGAGTGGGTGCTGCGAAACATGAACGGGACCGTGTTCACG  
GAGAAGAGCTACCCCTACGTCTCCGGCAACGGTGTATGCCCCGAGTGCTCGAACAGCAGTGAACCTCGCTC  
CCGGTGCGCGAATCGACGGGTACGTGTCGATGGAAAGCAGCGAAAGAGTTATGGCTGCGTGGCTTCCGAA  
GAATGGCCCCATCTCGATTGCGGTGACGCCAGCTCCTTTATGTCTTACCATAGCGGCGTCTGACCAGC  
TGCATTGGTGAGCAGCTGAACCATGGCGTGTCTCGTTGGGTACAACATGACTGGTGAGGTTCCGTACT  
GGGTGATCAAGAACTCGTGGGGTGGGACTGGGGCGAGAAGGGCTACGTGCGCGTGACCATGGGGGTGAA  
CGCGTGCCTGCTCACTGGGTACCCCGTGTCCGTGCATGTGTGCGAGAGCCCCACCCCTGGCCCAAACACG  
ACCACCACGACGCACGCTCCTAAACGGGTGACGGTGAAGCAGATCACCTGCACGGATTATTTCTGCCGAA  
AGGGGTGCAAGACGACGGTGATCCCCACGAAAGAGTGCCTGCCGAACGGGGCAGGCGGCTCTTTTCAGAT  
GGAGTGCGGTGACCATCAGGTGTTGAAGCTCACCTACACCTCCATGAATTGCACTGGTGAGGCCAAGTAT  
ACGGTGACAAGGGAGGGTAAGTGCGGGATATCGTGGTCCGGCTCGAGCAAGAGCATTGCCAGTACGTGT  
AG

>U43906 1222, 2220 *pkac1*

ATGATCACCAAGGCCGAAGCTTCCCAATGGAGGCTGAGCGACTTGGAGATGCGTGAGACGGTCCGGCACCG  
GCACTTTTCGGCCGAGTACGCTTGGTGAAGCACAAGGAACAGGCCAGTACGCGGCCCTCAAGATCCTGAA  
GAAGCAGGAGATTCTCCGAATGAAGCAGGTGACCCAGTGTATGGCGGAGGCAAGTCTTCTCCAGGAGATC  
GACCACCCTTTTATTGTGAGCATGCTGCGGGGATACATGGACAAGAACC GGCTGTACATTCTCCTCGAGT  
ACGTGGTAGGCGGCGAGCTGTTTTGCGATCTCCGCAAGGCCGGCAAGTTCCTAATGATGTCTCGAAGTT  
CTACTGCGCCGAGGTGATCCTAGCATTGACTACCTGCACAACAAGACGATCGTTTACCGTGATCTGAAG  
CCGGAGAACATTCTCCTCGACCAGGACGGCAACATAAAGATCACGGATTTCCGATTCCGGAAGCGCGTGA  
CGGAGCGTACGTTTACGCTTTGTGGCACACCCGAGTACCTAGCACCCGAGATCATTAGAGCAAGGGGCA  
CAACAAGGCTGTGCGACTGGTGGGCGCTCGGCATCCTGCTGTACGAAATGCTGGTTGGCTATCCGCCGTTT  
TTCGACGACAGCCCAATGAAGATCTACGAGAAGATCCTTGTGGGCAAGGTGCTGTTCCACGATGGGTAG  
ACTCGAAGGCCCGAGACTTCATCAAGGGCCTTCTATCCCTCGATCCCACGAAGCGCTCCGGCAATTTGCC  
CAACGGCACGGAGGACATCAAGAACCACAAGTACTTTGCGGAAGTGGACTGGAATGTAGTGCTGTCCAAG  
AAGATTTCCCGCGCAATCCCAGTGGGCAACACAAGGAGGGCGATACCCACTACTTCGACAAGTACCCCG  
ACAGCCCACTCAACCCTTTGGCCTTTGACTCCAGCACAGCAGGACTGCTTCGCCAACTTCTGCAACGG  
CCAGTATACGGACGAGTAG

>U51890 1, 502 RNA polymerase II largest subunit

NGACGTCCGACACCGGATACCTGCAGCGCAAGCTCGTGAAGGCGTGGAGGATGTGCACGCCTCCTACGA  
CGGCACGGTGCGGAACCGGAACCAGGAGCTCATCCAGCTGGCGTACGGCGAAGACGGTCTGGACGGTGT  
CGTATTGAGGGCAACCAGGCCTTCCCGATCCCGCACATGACGAACAGTGAGATGGCTGACAAGTACCGCT  
ACGAGTACAACGACGAAGGCAGCTTCTCGGAGAACATGGGCGGCCATTACATGGATCCGTTTGTGCGCGA  
CTCGCTGCTGCGCGACCCGAGAGCGTGTGAAGCTGCAGGAGGAGTTTGAAGCAGCTGATGAAGGATCGC  
GCGATGTGCGGGCTCGTGATCGACATGGAGGACAAGAACAAGCTCAAGATGAACCTGCCGTGAACGTG  
CGCGGCTCATCCAGAACGCGCGCACGACGATGGGCAAGCGCAGCCAGGTGTCCAATCTGAACCCGATCAC  
TGTGATCAACCG

>U59320 1708, 3477 *hsp60*

ATGCTCTCCCGTACGGTGCCTCGCTGTGTCAAGTACGGCTCAACGCCGAAGGACATCCGCTATGGCATGG  
AGGCCCGCAACGCCCTGCTTGCCGGCGTGCAGAACCTTGTCAAGGCCGTCCGGCTACGCTGGGCCCAA  
GGGCCGCAACGTGATTCTGGAGATGCCATACGCATGCCCGAAGATCACGAAGGATGGAGTCACGGTGGCC  
AAGAGCATCGAGTTGAGGACAGCTTCGAGAACCTTGGGGCGAACTTGGTCCGTCAGGTGGCAGGGCTGA  
CCAACGACAACGCCGTGACGGCACCAACCACCGCTACTGTCTCTCCGGGGCGATCTTCAAGGAGGGCTT  
CCGCAGCGTTGCAAGTGGCAGGAACCCGATGGACCTGAAGCGGGGCATCGACCTCGCATGCCGGGAGGTG  
CTCATATCGCTGGCCGAGCAGTCTCGCCAGTCACCTCCAAATCTGAGATACCCAGGTAGCGATGATTT

CGGCGAACATGGACCAAGAGATCGGCAGCCTGATCGGTGACGCGATGCAGCAGGTGGCAAGGATGGCGT  
AATCACAACGCAGGAGGGTCGCTCGCTTAATACGGAGCTCGAGCTGGTCGAGGGGATGTCCCTTTGAGCGT  
GGGTACACGTGCGCCGTACTTTGTGACGAACACGAAGGCGCAAAGGTGCGAGCTCGAGAACGCCCTCGTCT  
ACGTGGCGAACCGCAAACCTCACGAGCGTGGCGCACATCTTGCCCGCGCTGAACTACGCCATTCAGCAGAA  
GCGTCCGCTTCTGGTGATTGCCGAGGACGTGGAGGGGGAGGCCATGCACACGTTCCCTGTACAACAAGATT  
CAGGGCCGCATCAGTGGCTGCGCCGTCAAGGCCCGGGCTTTGGCGACATGCGCATCAACCAGCTGCAGG  
ATATCGCCGTCTTCACGGGGTTCGAGATGATCTCAGAAGACCTAGGCCTTTCACTGGACCAGAACGATTT  
CTCCGAGCGGTTCCCTCGGCACTTGTGAAAGGTGACCGTCTCCCGTGACGAGTGCATCTTGATGGAGGGC  
GGCGGCAGCGCCATCGCGGTGGAGGAGCGAGTGCAGATGATCAAAGACATGATCTCCGCCGAGGACCACG  
AATACAATCGCGAGCGTCTGGTCGAGCGTCTCGGAAGCTCTCGGGTGGGGTTGCGGTGATCAAGTTCGG  
TGGCGCCTCGGAGGTGGAGATCAATGAGAAGAAGGACCGCATATCGACGCGCTCAACGCCACGCGCGCG  
GCTGTATCAGAGGGCATCCTCGCAGGTGGTGGCACCAGGGTTGCTTATGGCCTCTCTGCGTCTCGAGAGCA  
TCTCCAAGGACCGACGACTTCCACCTGACATCCGCACTGGCGTGAACATTGTGAAGAAGGCAATCGGCCT  
GCCCGCGCGCTACATCGCGAACAAACGCAGGCGTCGAGGGCAGCGTGGTGGCGGGGAAGGTA CTCCGCGCG  
AAGGATCCGAGCTTCGGCTACAACGCGCAGACCGGCGAGTATGTGAATATGTTTCGAGGCTGGCATTATCG  
ATCCCATGAAAGTAGTGAAGTCCGCCGTGCTCAACGCATGCTCCGTGGCGGGCATGATGATTACGACGGA  
GGCGGCAGTGGTGGAGAAGGACCTGCTAGGGCGAGAGAAACGCATCGAGGATGAGGGGATGGAGGACAAG  
GAGAAGAAGCGCAGCGTCGACAACTGCGCAAGCAGGTAATGAGGGCGGACGCACCGATGCCAAGATG  
GCGCCGCCGATGAAGTTTGA

>U73845 1, 1640 protein antigen LmSTI1

TGGACGCAACTGAGCTGAAGAACAAGGGGAACGAAGAGTTCTCCGCCGGCCGCTATGTGGAGGCGGTGAA  
CTACTTCTCAAAGGCGATCCAGTTGGATGAGCAGAACAGTGTCTCTACAGCAACCGCTCCGCCTGTTTT  
GCAGCCATGCAGAAATACAAGGACGCGCTGGACGACGCCGACAAGTGCATCTCGATCAAGCCGAATTGGG  
CCAAGGGCTACGTGCGCCGAGGAGCAGCTCTCCATGGCATGCGCCGCTACGACGATGCCATTGCCGCGTA  
TGAAAAGGGGCTCAAGGTGACCCCTTCCAACAGCGGCTGCGCGCAGGGCGTGAAGGACGTGCAGGTAGCC  
AAGGCCCGGAAGCACGTGACCCCATCGCTCGCGTCTTACCCCGGAGGCGTTCGCAAGATCCAAGAGA  
ATCCCAAGCTGTCTCTACTTATGCTGCAGCCGACTACGTGAAGATGGTAGACACCGTCATCCGCGACCC  
TTCGCAGGGCCGGCTGTACATGGAAGACCAGCGCTTTGCCCTGACGCTCATGTACCTGAGCGGAATGAAG  
ATTCCCAACGATGGTGATGGCGAGGAGGAGGAACGTCCGTCTGCGAAGGCGGCAGAGACAGCGAAGCCAA  
AAGAGGAGAAGCCTCTCACCGACAACGAGAAGGAGGCCCTGGCGCTCAAGGAGGAGGGCAACAAGCTGTA  
CCTCTCGAAGAAGTTTGGAGGCGCTGACCAAGTACCAAGAGGCGCAGGTGAAAAGACCCCAACAACACT  
TTATACATTCTGAACGTGTCGCGCGTACTTTCGAGCAGGGTACTACGACAAGTGCATCGCCGAGTGGC  
AGCACGGTATCGAGCACGGTCGCGGAGAACCACTGCGACTACACAATCATTGCGAAGCTCATGACCCGGAA  
CGCCTTGTGCCTCCAGAGGCAGAGGAAGTACGAGGCTGCTATCGACCTTTACAAGCGCGCCCTTGTGAG  
TGGCGTAACCCTGACACCCTCAAGAAGCTGACGGAGTGCAGAGAAGGAGCACCAAAAAGCGGTGGAGGAAG  
CCTACATCGATCCTGAGATCGCGAAGCAGAAGAAAGACGAAGGTAACCAGTACTTCAAGGAGGATAAGTT  
CCCCGAGGCCGTGGCAGCGTACACGAGGCCATCAAGCGCAACCCTGCCGAGCACACCTCCTACAGCAAT  
CGCGCGGCCGCTACATCAAGCTTGGAGCCTTCAACGACGCCCTCAAGGACGCGGAGAAGTGCATTGAGC  
TGAAGCCCAGCTTTGTTAAGGGCTACGCGCGCAAGGGTCATGCTTACTTTTTGGACCAAGCAGTACAACCG  
CGCGCTGCAGGCGTACGATGAGGGCCTCAAGGTGACCCGAGCAATGCGGACTGCAAGGATGGGCGGTAT  
CGCACAATCATGAAGATTCAGGAGATGGCATCTGGCCAATCCGCGGATGGCGACGAGGCGGCGCGCCGGG  
CCATGGACGATCCTGAAATCGCGGCAATCATGCAAGATAGCTACATGCAACTAGTGTGAAAGGAGATGCA  
GAACGATCCCACGCGCATTCAGGAGTACATGAAGGACTCCGGGATCTCATCGAAGATCAACAAGCTGATT  
TCAGCTGGCATCATTTCGTTTTGGTCAGTAG

>U91743 1500, 2615 LmPKAC2b

ATGTCGTCTGCTGCCAAGGACAGTTATCCGGCGGAGTCGTCTGGGCCACCTCAACAACGAGAAGGCGCAGC  
TGTCGAAGATTCCCTCCAGTCATCCAGACCCCTCGAAGGTGACTGTCTGGCCAAACGTCAAGGCCGCTTA  
TTACTTCGCAAAGCCAGACACCTCCAGCTGGAACTCTCAGATTTGAACTGAAGAACACGCTCGGCACC  
GGTTCCTTCGGCCGCTGCGCATCGCCACCGCAAGGGCACGGAGGAGTACTACGCGATCAAGTGCCTGA  
GAAAGCGCGAGATCATCAAGATGAAGCAGCAGCAGCACGTTGCGCAGGAAAAGGGGATCCTAATGGAGCT  
GTGTCAACCGTTCATCGTGAACATGATGTGCTCCTTCCAGGACGAGAAGAAGGTGTAATTTCTGCTGGAG  
TTTGTTCATGGGCGGCGAGATGTTACGCACCTGCGCACTGCCGGGCGGTTCCCGAATGACGTTGCGAAGT  
TCTACCACGCGGAGCTGGTGTTCGTTTCGAGTATCTGCACTCGCTGGACGTGATCTACCGGATCTGAA  
GCCGGAGAATCTGCTGCTGGACAACAAGGGGCATGTGAAGATGACGGACTTTGGGTTTGGGAAGAAGGTG  
CCGGACCGGACGTTACGCTGTGCGGGACACCGGAGTACCTTGCGCCGAGGTGATCCAGAGCAAGGGCC  
ACGGGAAGGCGGTGACTGGTGGACGATGGGCGTGTGCTGTACGAATTCATTGCCGGATACCGCCGTT  
CTACGACGACACGCCGTTCCGGATTTACGAGAAGATCCTTGGCTGGGCGGCTGAAGTTCCCGAATGTTTT  
GACGGCCGCGCGCGACCTCGTGAAGGGCTGCTGCAGACGGACCATAACGAAGCGCCTGGGGACGCTGA  
AAGGCGGGCCGGCGGACGTGAAGAACCATCCGTAATTCACGGTGCGAAGTGGGACAAGCTGTACGCACG  
TTACTACCCCGCGCCGATCCCTGTGCGGTGAAGAGCCCTGGCGACACGAGCAACTTCGAGAAGTACCCG  
GACAGCCCGGTGACCCGACGCCTGCGCTGACATCGGCGCAGCAGGCCGAATTCATGGCTTTTAG

>U91744 582, 1487 Lmairk

ATGACGACAGAGGTCGGCCCGGACGACAATGTCTGAACAACCTTCATCATTACCCCGTCGTCCCAAAGT  
CGGAGTGGACGATACAGACTTTGAGCTGCTGCACAAGCTGGGAGGAGGCAATTACGGTGATGTCTACCT  
GGCGAGTGTCCGCAAGAGCAACTACGTCGTGGCCATCAAGAAGCTCTCGATCAAGAAGCTGGCAGAGTTT  
GACATTGTGAACCAGCTGCGGCGGAGATCGAGATCGCCTTCAACACGCGACACAAATACCTCCTACGCA  
CCTACGCCTACTTCTTCGATGAGCAGACATCTACCTTATCCTGGAGCCGTGCAGCAACGGCATGCTCTA  
CAGCGAGCTGAATCGCGTGAAGCTGTTCCCGCCCGACGGCAGCCCGCTATGTGGCGCAGCTCGCCGAG  
GCACTTCTTTACCTCCACCAGCACCATTTCTGCACCCGACATCAAGCCGGAGAACATTCTGCTGGATC  
ATCATCAGAACATCAAACCTGCGGATTTCCGGCTGGTCTGTGCATGACCCGCTGAACGGCGCAAGACCTC  
CTGCGGCACGCCGAGTACTTCCCCCGGAGATCGTTAGCCGGCAGATGTATGACATGAGCGCCGATCTC  
TGGTGCCTGGGCATCTTCTGCTTTGAACTGCTTGTGGGCCACACACCGTTTCGTGAGCAAGGACAACGACC  
AAATCTACAAGAAGATCCATGCGATGCAGTACACCATCCCCGACAGCGTCCCACCAGAGGCGAAGGATTT  
GATTTCAAATCTGCTCATCCGCGAGGGTTCGAAGCGGCTGGCGCTACATCGCGTGTGAGCCACCCCTT  
TTGCTCAAATACTACTATGTTCAAACGGCATTACGCCCGGACGGGAAAGCGGCCGCGCAGCTAG

>U92487 1, 1344 LmAP

ATGGCCTCGAAGCGATGCCGGCAGTGCAGCGGCGACTCTGCGTCCTCATCGACCTCGTCTGTGTCACCAT  
CCGAGCTGCCGCCCTCGAAGAAGGCGGCTGGCGGTCAGCGAGTACGGCGGAAGTTGAAGTGGCGCCCAT  
CACAACGGACGCTACGTCCTGCACTGTCACGGCTGCAGGCGGCGGAAGAAAAAGGCGACGACGGGGAGC  
CCCGCACGTGCGACGAGCAGCGGGCAAAGATCACGAACGGTACGCGGCTGAGCTGATCCGCACCGCGG  
AGGCCCTCGCCGCTCTCAACGCGAAGAAGTCCGAGAAGGAGATTTGGTCTGACGTGGTGCCGTTCTGTGG  
CAGGACCACGGACAGCGACTTCGACCCGTCGCGCATGTACAAGTTCATTACGTGGAACGTAGCCGGCCTA  
CGCGGGCTGCTGAAGAAGAACGCCCTCGGCGCTGAGAGCGTTTCATGGAGGCCGAGAAGCCGGATGTTCTGT  
GCCTGCAGGAGACCAAGCTGAACGTCGACGAGGCCGATGCCAATGCGACCCCTCGGCGTGGTGGACGGCTA  
CTCCTTTGTGGACACCCGTCGCGCTTCAAGCGGGGCTACTCGGGCACCCGACCTACATGAAGAACAGC  
ACCACTGTGAAAGGGCTGCACGCACGGTGCACCTCGTGGCTTTGCAATTGCCGTCGAACCACAGGCAGACG  
CGGCCGCCGGCTCACGGGTGCTGGTAGAAGGCGCTGGCGACGAGGAGGGCCGCGTGTGACTACATTCCT  
CTCTCCGGATCCGGACTCTGCATCGTCTGTCGCGCATCGCCCTCGTGAACACCTACGTGGCGAACAGC  
GGCATGGGACTGACCGGCTGCCTTACCGCGTCCAATCCTTTGATCCCAGCATGAGGGAGTACCTTACC  
GGCTGGACACCTGGGCCACAGAAAATGCCGCCGTCCTGTCGGCGGCGGCGATGGGCAGCGGCAGCAGCC

GCACGGCTTTATCTGGGCTGGCGACCTCAACGTGGCGGAGCGGGACTACGACCGTTACTACGCCGGTACG  
TTCAAGTCAATGCAGGAGTGCAGCGGCTTTGCACCTGAGGAGCGGATGTCTTTTCGCGAGACGATGCAGC  
GGACGAATTCGGTGGACATCTTTCGCCAGCTCTACCCCAGGCAGGCCCGGTCTACTCCTTCTGGTCTCA  
GCGTATCAACGGTGCCTCCGAGAAACTTGGGGTGGCGCTTGGACTACTTCGTTGTTTCCTCGCGACTTGCA  
TCGTACGTCTGGACTGCTTCCCAGTCCGACGGTGTATGGGCAGCGATCACTGTCCGTTCCAGATGTGGA  
TGCGACACCCATGA

>X06555 1, 645 antigen (214 AA)

CAGGAGACGTCCGCGAAGCTCGCTGACACCGAGGAGACGCTGCAGGAGACATCCGCGAAGCTCGCTGACA  
CCGAGGAGACGCTGCAGGAGACATCCGCGAAGCTCGCCGACACCGAGGAGACGCTGCAGGAGACGTCGCG  
GAAGCTCGCTGACACCGAGGAGACGCTTTCAGCGGAGATCGCGTCTGGCGGAGCAGCATGGTGTGGCG  
CAAACCTTTATGTGAGCAGCAGGGCGGTACATGAACCAGCTGCTGACGTACGTGAGGGCAGCATAACAACG  
TGA CTCTGGATGGGATGACGGAGGTGCAGGCGACAGCTGTGGCTGATATCCTGAGGCAGTGGACTATGC  
ACTTCGCTCTGTGGCGCAGGCTGCCAGTGACGAGGTGGAGCACGTAAAGGAGATGTACAATATGGTCGAC  
GGCAACTACAAGGAGACGGCAGCGCGCTTCGATATACTGCGCCGATTCTGGGAAAAGATCGATCAGGATG  
TCAAGGAGGGCAGCGTGGAGATCGACGCACCGGAGCGGGCAGACCTGCTCTTTACACCCGACGCCGCG  
GCGCTTGGGGCAGCTCTCGAACCGCGAGAACAGCATCGAGAACAAGACCCGCTCCGCATCTCGGCTGTCT  
GGACGGCTATTTTAG

>X14574 1, 749 Leishmania major hsp70.1 gene for  
heat shock protein 70-related

ATGTTTGTCTCGTCTGTGTGCGGAAGCGCTGCGGCGTGGCTGCGTGCCTGGCGGCCACGAGTCGCAGA  
AGGTGCAGGGCGACGTGATTGGCGTGGACCTGGGCACGACGTACAGCTGCGTGGCGACGATGGACGGCGA  
CAAGGGCGCGGTGCTGGAGAACTCGGAGGGCTTCCGGACGACGCCGTCTGTTGTGGCGTTCAAGGGCAGC  
GAGAAGCTTGTGGGGCTTGGCGGAAGCGGCAGGCGATCACGAACCCGACGTGACGTTCTATGCTGTGA  
AGCGGCTGATCGGGCGCCGTTTCGAGGACGAGCACATCCAGAAGGACATCAAGAACGTGCCGTACAAGAT  
CGTGC GCGCGGGGAACGGTGACGCGTGGGTGCAGGACGGGAACGGGAAGCAGTACTCGCCGTGCGAGATC  
GGCGCGTTCGTGCTGGAGAAGATGAAGGAGACGGCGGAGA ACTTCTGGGGCACAAGGTGAGCAACGCCG  
TCGTGACGTGCCCGGCTACTTCAACGACGCGCAGCGCCAGGCGACGAAGGACGCGGGGACGATCGCGGG  
CCTGAACGTGATCCGCGTGGTCAACGAGCCGACTGCTGCGGCTCTTGCGTACGGCATGGACAAGACGAAG  
GACAGCCTGATCGCGGTGTACGACCTCGGTGGCGGCACGTTTCGATATCTCCGTGCTGGAGATCGCTGGCG  
GCGTGTTCGAGGTGAAGGCGACGAACGGCGACACGCACCTTGGCGGGC

>X14575 1, 685 Leishmania major hsp70.4 gene for heat  
shock 70-related protein,

ATGTCGTCTACCAAGCATCGCATCGACCTGGGCACGACGTACTCGTGCCTCGGTGTCTTCAAGAACGAGC  
AGGTGGACATCATTGCCAACGACCAGGGTAACCGCACACCGCCGTCTTATGTGGCCTTACCGGAGACAGA  
GCGCCTGATCGGCGATGCGCGAAGAACCAGGTGGCATGAACCCCGGGCAACACCGTGTGTTGACGAAGCG  
CATGATCGGCCGCAAGTTCGACGACCTGACCTTCAGTCGGACATGAAGCACTGGCCCTTCAAGGTGATCG  
TCAAGGACGGCAAGCCGGTCAATCAGCGTGCAGTACCAGAACCAGACCAAGACCTTTTCCAGAGGAGATCT  
CGGCTATGGTGTGTCAGAAAATGAAGGAGACGGCGGAGGCTACCTCGGCACGACCGTCAAGGACGCCGTC  
ATCACCGTCCCGGCTACTTCAACGACTCGCAGCGCCAGGCAACGAAGGACGCGCGCTCCATCGCTGGCC  
TCAACGTGCTGCGCATCATCAACGAGCCCACCGCCCGCTATCGCGTACGGCATGGACCGCAAGGGAGA  
CAAGGGGGAGAAGAATGTGCTCATCTTCGACCTTGGCGGGCGGCAGTTTCGATGTGACGCTGCTGACGATC  
GAGTCCGGCGTGTTCGAGGTAAAGGCAACCGGGTGACACGCACCTTGGCGGC

>X51733 953, 2515 Leishmania major DNA for  
dihydrofolate reductase-thymidylate

ATGTCCAGGGCAGCTGCGAGGTTAAGATTCCGATGCCGGAGACGAAGGCAGACTTTGCTTCCCCTCCC

TGCGCGCCTTCTCCATCGTCGTGGCCCTCGATATGCAGCACGGCATCGGGCGACGGCGAGTCGATCCCGTG  
GCGGGTGCCGGAGGACATGACGTTCTTCAAGAACCAGACGACGCTGCTGCGCAACAAGAAGCCGCGGACG  
GAGAAGAAGCGCAACGCCGTCGTGATGGGCCGCAAGACTTGGGAGAGCGTCCCGGTAAGTTCCGACCAC  
TCAAGGGACGGCTGAACATCGTGTATCCTCGAAGGCCACCGTCGAGGAGCTTCTGGCGCCGCTGCCGGA  
GGGACAGCGCGCGGGCGGGCGGCAGGATGTGGTGGTGGTGAACGGCGGTCTGGCCGAGGCGCTCCGCCTC  
CTCGCACGCCGCTGTACTGCAGCTCCATCGAGACAGCGTATTGCGTCGGTGGTGGCAGGTTTACGCGG  
ACGCCATGCTGTGCGCCGTGCATCGAGAACTGCAGGAAGTGTACCTGACCCGCATCTACGCGACGGCGCC  
TGCGTGTACGCGCTTCTTCCGTTTCCGCCCAGAACGCGGCCACGGCGTGGGACCTGGCGTCGTCTCAG  
GGACGCCGCAAGAGCGAGGGCGAGGGCCTCGAGTTCGAGATCTGCAAGTACGTGCCGCGCAACCACGAGG  
AGCGGCAGTACCTTGAGCTGATTGACCGCATCATGAAGACGGGGATCGTGAAGGAGGACCGCACCGGCGT  
GGGACCATCAGCCTCTTCGGCGCCAGATGCGCTTCTCCCTACGCGACAACCGCCTGCCGCTGCTGACG  
ACGAAGCGTGTCTTCTGGCGCGGCGTGTGCGAGGAGCTGCTGTGGTTCTGCGCGGGGAGACGAGTGGCG  
AGCTGCTGGCAGACAAGGACATTCACATCTGGGACGGCAACGGTTCGCGCGAGTTTCTCGACAGCCGCGG  
CTTGACAGAGAATAAGGAGATGGACCTCGGCCCTGTCTACGGCTTCCAGTGGCGCCACTTCGGGGCAGAT  
TACAAGGGGTTTGAAGCGAACTACGACGGCGAAGGGGTGGACCAGATCAAGCTCATCGTGGAGACCATCA  
AGACGAACCCGAACGACCGCCGCTCCTAGTCACTGCCTGGAACCCGTGCGCGCTGCAAAAAGATGGCGCT  
GCCGCGGTGCCACTTGCTTGCTCAGTTCTACGTGAACACAGACACGAGCGAGCTATCCTGCATGTTGTAC  
CAGCGCTCGTGTGACATGGGTCTTGGCGTCCCCTTCAACATTGCCTCCTACGCGCTGCTCACCATCCTCA  
TTGCCAAGGGCAGCGGTCTGCGGCCCTGGTGAAGTGTGACACCCCTCGGGCAGCCACGCTTACCAGCAA  
CCACGTTGATGCCCTCAAGGCGCAGCTCGAGCGAGTCCCGCACGCGTTCCCGACCCCTCATCTTCAAGGAG  
GAGCGGCAGTACCTCGAGGACTACGAGTTGACGGACATGGAGGTGATCGACTACGTTCCACACCCGGCGA  
TCAAGATGGAGATGGCCGTATAGAGAGAGGGAGGGTGTATGTGCGTTGTATGCATGCAGCCACCGCCGC  
GACGCTGCCACTCACCTGGCTCCCACCTCCTCGTCGCACGACGACCGCCCTTGGCGAGACTCGTTGGGT  
AACCATGAGCGGGCGGGAGGGGTACGCGCCTGCGTTTTCTCGCACATGGCTGCGGCTGATATCCCGCCCC  
CACCCGCGCGGCTCAGGCCGCGTGTGCTGCTCTTTCCATTTTTTTTTTTTGTGTGTGGTGGTGAATTTG  
AGCTGCTCTCCGTTGTGTGCTGGGGACCCTCCTTCCCTCGATCTCCTCGTGGGGTCTCCGACGCGCAG  
ACGCGGTGCGTGGAGCGTGCACGTGCTGTGCGCGTGGCTGTAGTTGCGAGCGGAGAGAGAGAGAGGGG  
AGGGAGGGAGGGCAGAGGGCAGAGGACATGCGGGTGGAACTGCACCGGCCTCGTCTACGCAGCTGGA  
GCCCACGAATGCCACCACCACCCCTTCTTCCCCCCCCCTCCCTCTTCTTCCCACGGCGGGCAGCAGCAGC  
GGGGGCTCAGCTCAGCTTCTGTAGGGTATTATATTAAGCACATGTGCGTGTGCTGTGCTTCGGCTTCTTG  
TTGGTGGTCTGCTTCAAGTCCACGACTCCTGCCGTTGCTCACCGCCGGGCTGTCTTCTTTCGCCCC  
TCCCTCGGTGCCTCTTCCGCCGCCGACGCGTGCCTGATCACGCGTCTTGGTGTGCTGTGCTGTGTGTA  
TACACACCGTGCACGGAGAGAGCGAGCGAGAGAGAGAGAGGGCGAGAGGAAGAATGGCCGTTGCCCT  
CGCGTGGGCAAGCGTGCAGGAGTTTGTGCTGTGCTGCGCCGCGTGGATGTGCGCGCAGCGCAAGACCCCG  
TGCGCCTGAAACGTGAAGGGA

>X56810 1, 732 surface antigen P2

NGAATTCGGTGCCTGCAGTCGCTTGATACTGCGGCTGTCCGGCAGTAAGGTCTCCGGCACGCTGCCG  
CCCCAGTGGAGTGGGATGTGGAAGGCCCGTCCCTGCAGCTGCAGGACTGCGACCTGTCCGGCAGTCTGC  
CCTCTTCGTGGTCTGCGATGCCGATGCTGGCTTCCGTCTCTCTTAAGGGCAACAAGTTCTGCGGGTGTGT  
GCCGACTCGTGGGATCAGAAGGCTGGTCTTGTGTGGACATCGAGGACAAGCACAAGGGCAGCGACTGC  
TTGGCTGGGAGGGAGTGCACAACGACCACCTAAGCCCCCTACCATGACCACGACCACCTAAGCCCA  
CCGCCACGACAACGACCCTACGAGCCCCACTAACTTTCCCCCTACGCCGACGACCACGACTGAGCCGCT  
TACCACAACCAGCACTGAGGCACCAGCTGAACCCACAACCACCTGAGGCACCGCTGAACCCACGACC  
ACTGCTACCCCAACAAACAGCCGACTCCTGCTCCTGAGACGGAGTGGGAGGTGGATGGGTGTGAGGTGT  
GCGAGGGGGACTCCGCTGCGAGGTGCGCCAGGTGCCGTGAGGACTACTTCTGACGGACGAGAGGACGCTG

CCTGATGCACAACGATGGCGGTGTTGCTGCTGTGTCGAGCGGAGTGGCAGCAGCAGCTGTTGTGTGCGTG  
GCTGTGCTGTTTACGCGTGGGGCTGGCGGCGTG

>X57009 206, 1360 tr-1

AATGGCGCAGTGGTGCCTGCGGCTGGTGTCTCGGCGACGCTCGCCGCTGCGGTGGCGCTGCTGCTGTGCAC  
GAGCAGGCTCGGGTGGCGCGTGTGCTGGGACGGGCGACTTCACTGCGGCGCAGCGGACGAACACGCTGG  
CGGTGCTGCAGGCGTTTGGGCGTGCATCCCTAAGCTTGGGAGAAGTGGGCGGGCAACGACTTCTGCTC  
GTGGGAGGCCGTCTTGTGCAATGCGCCGACGTGTACGTGTGCGGAATCAGTCCGACGTATGCCGGCAGC  
CTGCCGGAGATGCCAGAGAACGTCGACTACAGGCACGTCGTGATCAGGCGGCTCGACTTTTCCGAAATGG  
GGCCGGGGCTGAGCGGGACCGTGCCTCATGGCACTCGATGACATCTTTGGAGTCGTTGTCGATTGA  
AAAGTGTGAAAGCATCTCCGGCAGTGTGCCCCCGAGTGGGGCTCGATGACATCGCTGAGTGTCTCAAT  
CTGCGGGGCACAGGCATCTCCGGCACGCTGCCGCCCACTGGAGTGGGATGTGAAGGCCCGTCCCTGC  
AGCTGCAGGACTGCGACCTGTCCGGCAGTCTGCCCTCTTCGTGGTCTGCGATAACCGATGCTGGCTTCCGT  
CTCTCTTAAGGGCAACAAGTTCTGCGGGTGTGTGCCGACTCGTGGGATCAGAAGGCTGGTCTTGTGTG  
GACATCGAGGACAAGCACAAGGGCAGCGACTGCTTGGCTGCTAAGGACTGCGCAACGACCACCACTAAGC  
CCTCCGCCACGACAGCGACCACCCCGAACCTCACTAACTTTCCCCCTACGCCGAGGACCACGACTGAGCC  
GCTTACCACAACCAGCACTGAGGCACCGGCTGAACCCACAACCACCACTGAGGCACCGGCTGAACCCACG  
ACCACTGCTACCCCAACAACACGCGGACTCCTGCACCAGAGACGGAGTGCAGGTTGGATGGGTGTGAGG  
TGTGCGAGGGGACTCCGCTGCGAGGTGCGCGAGGTGCCGTGAGGACTACTTCCCTGACGGACGAGAAGAC  
GTGCCTGAAGCACAACGATGGCGGTGTTGCTGCTGTGTCGAGCGGAGTGGCAGCAGCAGCTGTTGTGTGC  
GTGGCTGTGCTGTTACGCGTGGGGCTGGCGGCGTG

>X57134 1, 1117 surface antigen P2

CGAGTGGAGCTGGCTGCCTAATTTACAGACTCTGCGGCTAAGGCGACTAAAAGTGGAGCGGTACGCTGCCT  
GCGGAGTGGAGCTCTTGAAAATCACTGTGCAACGTCTTTCTTGACGACACGCCGATCACAGGCTTGTTC  
CCCCGGAGTGGGGCTCGCTGGAGAGAATACAGCAGCTGGTTTTACGGAAATTGAAGATTACCGGCCCTCT  
CCCTCCTCAGTGGAGCCTAATGAAGTATTGCGGGTCTAGATCTGGATAGCACGAAGGTATGCGGCACG  
CTGCCGGCCGAGTGGAGTCGGATGTCGACGGCTGCATACTTCTGGCTGAACAACACTACGACCTGTCCGGCA  
CGCTGCCGCCCCAGTGGTTCGTGATGCCATACCTGCGCGGCTCTCACTGAAGGGCAAGCGCTTCTGCGG  
GTGTGTGCCGAGTCGTGGGCCAACAAGGCTGATCTTGTGTGAAAATCGAGGACAAGCACAAGGGCAGC  
GACTGCTTGGCTGGTAAGGACTGCACAACGACCACCACTAAGCTCCCCACCACGACAACGACCACCACAA  
AACCCCCCACCACGACAACGACCACCACTAAGCCCCCACCACGACCACGACCACCACAAAACCCCCCACC  
CACGACAACGACCACCACTAAGCCCCCACCACGACAACAACCACCACAAAACCCCCCACCACGACAACG  
ACCACCACAAAACCCCCCACCACGACCACGACCACCACTAAGCCCCTAACGACAGCGACCACCACTAAC  
CCCCTACCACGACCACGACCACCACTAAGCCGCCGACCACCATAACGAGCACTACTAAGCTGCCAACCC  
AACCACCACTGAGGCACCGGCTGAACCCACGACCCTGCTACCCCAACAAAACGCGGACTCCTGCACCA  
GAGACGGAGTGGAGGTGGATGGGTGTGAGGTGTGCGAGGGGACTCCGCTGCGAGGTGCGGAGGAGCC  
GTGAGGACTACTTCCCTGACGGACGAGAGGACGTGCCTGGTGTACTGCGATGGCGGTGTTGCTGCTGTGC  
GAGCGGAGTGGCAGCAGCAGCTGTTGTGTGCGTGGCTGTGCTGTTACGCGTGGGGCTGGCGGCGTGA

>X57135 1, 984 surface antigen P2

GAATTCAGCTGGTTCTAGAGAAATCGAAGCTGACCGGCCCTCTCCCTCCTCAGTGGAGCTCGATGAGAT  
CGCTGAGCCTTCTGAACCTGAATGGCGCAAAGGTCTCCGGCACGCTGCCGCCGAGTGGAGTGGGATGTC  
GAAGGCCGCATACTTCTGGCTGAACAACCTGCGACCTGTCCGGCACGCTGCCGCCCAAGTGGTTCGTGATG  
CCAAACCTGCGCGGCGTCTCACTGAAGGGCAACCGCTTTTGGGGTGTGTGCCGGACTCGTGGGCCAACA  
AGGCTGATCTTGTGTGAAAATCGAGGACAAGCACAAGGGCAGCGACTGCTTGGCTGGTAAGGACTGCAC  
AACGACCACCACTAAGCTCCCCACCACGACAACGACCACCACTAAGCCCCCACCACGACAACGACCACC  
ACAAAACCCCCCACCACGACCACGACCACCAAAAACCCCCCACCACGACAACGACCACCACAAAACCCC



CCACCACGACAACGACCACCACTAAGCTCCCCACCACGACAACGACCACCACAAAACCCCCACCACGAC  
AACGACCACCACGACAACGACCACCACGACCACGACCACCACTAAGCCCCCATCACGACAGCGACCACC  
ACTAAACCCCCTACCACGACCACGACCACCACTAAGCCGCCGACCACGATAACGAGCACTACTAAGCTGC  
CCACCACAACCACCACTGAGGCACCGGCTGAACCCACGACCCTGCTACCCCAACAAACACGCCGACTCC  
TGCACCAGAGACGGAGTGCAGGTGGATGGGTGTGAGGTGTGCGAGGGGGACTCCGCTGCGAGGTGCGCG  
AGGTGCCGTGAGGACTACTTCCGTACGGACGAGAGGACGTGCCTGGTGTACTGCGATGGCGGTGTTGCTG  
CTGTGTCGAGCGGAGTGGCGGCAGCAGCTGTTGTGTGCGTGGCTGTGCTGTTTACGCGTGGGGCTGGCGGC  
GTGA

>X62942\_0 2107, 4329 homologous to rat ribosomal protein S8

CATGGGCATCGTCCGACGTCGCTGCATAAGCGCAAGATCACCGGTGGAAAGACCAAGATCCACCGGAAG  
CGCATGAAGGCCGAGCTGGGCCGCTTCCCGCAACACCCGCTTGGCGCCCGCCGCTGAGCCCTGTGC  
GTGCTCGCGGTGGCAACTTCAAGATCCGTGCCCTGCGCTGGACACCGGCAACTTTGCTGGGCCTCCGA  
GGCCATCGCACACCGCGTGCCTTCTCGACGTCGTGTACAACGCCACGTGCAACGAGCTGGTGCCTACG  
AAGACGCTGGTGAAGAAGTGCATCGTCGCCGTGGATGCCGCGCCGTTCAAGCGCTGGTATGCCAAGCACT  
ACGGCATCGACTTGGATGCAGACAAGAAGAGCACCAAGGCCGCGTTGCTGCGGAGAAGAAGGCAGGAA  
GTCCGCCACGCCGCTGCTGACAAGTACGACGTGAACAAGGCCTCGCCCAAGCTTCAGCGCGAGTGGACG  
CGCCGCCGCCCAACCACAGGGTCGAGAAGGCGATCGCCGATCAGTTGCGCGAGGGTCGCGTGCTTGGCG  
GCATAACGAGCCGCCGCGGCCAGTCCGCGCGTGCCGACGGTATCCTGCTGGAGGGCGCCGAGCTCCAGTT  
CTACCTGAAGCGCCTGGAGAAGAAGAAGAAGTA

>X62942\_1 3667, 4329 homologous to rat ribosomal protein S8

CATGGGCATCGTCCGACGTCGCTGCATAAGCGCAAGATCACCGGTGGAAAGACCAAGATCCACCGGAAG  
CGCATGAAGGCCGAGCTGGGCCGCTTCCCGCAACACCCGCTTGGCGCCCGCCGCTGAGCCCTGTGC  
GTGCTCGCGGTGGCAACTTCAAGATCCGTGCCCTGCGCTGGACACCGGCAACTTTGCTGGGCCTCCGA  
GGCCATCGCACACCGCGTGCCTTCTCGACGTCGTGTACAACGCCACGTGCAACGAGCTGGTGCCTACG  
AAGACGCTGGTGAAGAAGTGCATCGTCGCCGTGGATGCCGCGCCGTTCAAGCGCTGGTATGCCAAGCACT  
ACGGCATCGACTTGGATGCAGACAAGAAGAGCACCAAGGCCGCGTTGCTGCGGAGAAGAAGGCAGGAA  
GTCCGCCACGCCGCTGCTGACAAGTACGACGTGAACAAGGCCTCGCCCAAGCTTCAGCGCGAGTGGACG  
CGCCGCCGCCCAACCACAGGGTCGAGAAGGCGATCGCCGATCAGTTGCGCGAGGGTCGCGTGCTTGGCG  
GCATAACGAGCCGCCGCGGCCAGTCCGCGCGTGCCGACGGTATCCTGCTGGAGGGCGCCGAGCTCCAGTT  
CTACCTGAAGCGCCTGGAGAAGAAGAAGAAGTA

>X64137 1, 1905 hsp70.1

ATGTTTGTCTCGTGTGTGCGGAAGCGCTGCGGCGTTCGGCTGCGTGCCTGGCGCGCCACGAGTCGCAGA  
AGGTGCAGGGCGACGTGATTGGCGTGGACCTGGGCACGACGTACAGCTGCGTGGCGACGATGGACGGCGA  
CAAGGCGCGCGTGTGAGAACTCGGAGGGCTTCCGGACGACGCCGCTCTGTTGTGGCGTTCAAGGGCAGC  
GAGAAGCTTGTGGGGCTTGCGGCGAAGCGGCAGGCGATCACGAACCCGACGTCGACGTTCTATGCTGTGA  
AGCGGCTGATCGGGCGCCGTTTCGAGGACGAGCACATCCAGAAGGACATCAAGAACGTGCCGTACAAGAT  
CGTGCAGCGGGGAACGGTGACGCGTGGGTGCAGGACGGGAACGGGAAGCAGTACTCGCCGTCGAGATC  
GGCGCGTTCGTGCTGGAGAAGATGAAGGAGACGGCGGAGAATTCTGGGGCACAAGGTGAGCAACGCCG  
TCGTGACGTGCCCGGCTACTTCAACGACGCGCAGCGCCAGGCGACGAAGGACGCGGGGACGATCGCGGG  
CCTGAACGTGATCCGCGTGGTCAACGAGCCGACTGCTGCGGCTCTTTCGTACGGCATGGACAAGACGAAG  
GACAGCCTGATCGCGGTGACGACCTCGGTGGCGGCACGTTTCGATATCTCCGTGCTGGAGATCGCTGGCG  
GCGTGTTCGAGGTGAAGGCGACGAACGGCGACACGCACCTTGGCGGCGAGGACTTTGACCTGGCGCTGTC  
GGACTACATCCTGGAGGAGTTCGCAAGACGAGCGGGATCGACCTGAGCAAGGAGCGGATGGCGCTGCAG  
CGCGTGCAGGAGGCCGCGGAGAAGGCGAAGTGCAGCTGTGCTCTGCGATGGAGACGGAGGTGAACCTGC  
CGTTCACTACTGCGAACGCCGACGGCGCGCAGCACATCCAGATGCGCATCAGCCGTAGCAAGTTCGAGGG

CATCACGCAGCGGCTGATCGAGCGGTCGATTGCGCCGTGCAAGCAGTGCATGAAGGACGCTGGTGTGGAG  
CTGAAGGAGATCAACGACGTTGTGCTTGTGGCGGCATGACGCGCATCCGAAGTGGTGGAGGAGGTGAAG  
AAGTTCTTCCAGAAGGACCCGTCGCGGCGTGAACCCGACGAGGCTGTGGCGCTTGGTGCCGCGACGCT  
GGGCGGCGTGCTGCGGGGTAAGGCGAGTGACTTGATACTGGTGGACGTGACACCGCTTTCGCTGGGCACA  
AGTGTGCTCGGGCAGCTGTTTGTGCCATTATCCCCAAGAACACGACGATCCCGTGCATGCGCAGCCATA  
TCTTCACAACGGTGGACGATGGTCAGACAGCCATCAAATTCAAGGTGTTTCATCCCGCCCGCGCCGCTGG  
GGTGCCGCGAGTTGAGGTGACGTTGACATCGACGCGAACCAGGGCGAGCGGAAATCGCCTCCGAAAAC  
CAGATAAGGGGTGAGTTCGATCTTAGCGGCGGCATCTGCCACGTGACGGCGAAGGACAAGGCGACGGGCA  
AGACGCAGAACATCACGATCACGGCGAACGGCGGGCTGTGCAAGGAGCAGATCGAGCAGATGATCCGCGA  
CTCGGAGCAGCACGCGGAGGCCACCGCTGAAGCGCGAGCTTGTGGAGGTGCGCAACAACGCGGAGACG  
CAGCTGACAACGGCGGAGAGGCAGCTCGGCGAGTGAAGTACGTGAGCGATGCGGAGAAGGAGAACGTGA  
AGACGCTGGTGGCGGAGCTGCGCAAGGCGATGGAGAACCCGAACGTGGCGAAGGATGACCTTGGGGCTGC  
GACGGACAAGCTGCAGAAGGCTGTGATGGAGTGGCGCCGCACAGAGTACCAGCAGGCTGCCGCGCCAAT  
TCTGGCCAGTGTGA

>X69825 1, 1896 hsp70.4

ATGTCGTCTACCAACGCCATCGCGATCGACCTGGGCACGACGTACTIONCGTGCCTCGGTGTCTTCAAGAACG  
AGCAGGTGGACATCATTGCCAACGACCAGGGTAACCGCACAACGCCGTCTTATGTGGCCTTCACCGAGAC  
AGAGCGCCTGAATCGGCGATGCGCGAAGAACCAGGTGGCCATGAACCCGAGCAACACCGTGTTTGACGCG  
AAGCGCATGATCGGCCGAAGTTCGACGATCCTGACCTTCAGTCGGACATGAAGCACTGGCCCTTCAAGG  
TGATCGTCAAGGACGGCAAGCCGTCATCAGCGTCGAGTACCAGAACCAGACCAAGACCTTTTTCCAGA  
GGAGATCTCGGCTACGGTGTGTCAGAAAATGAAGGAGACGGCGGAGGCCTACCTCGGCACGACCGTCAAG  
GACGCCGTATCACCGTCCCGGCGTACTTCAACGACTCGCAGCGCCAGGCAACGAAGGACGCGCGGCTCCA  
TCGCTGGCCTCAACGTGTGCGCATCATCAACGAGCCCACCGCCCGCTATCGCGTACGGCATGGACCG  
CAAGGGAGACAAGGGGGAGAAGATGTGCTCATCTTCGACCTTGGCGGGCGCACGTTTCGATGTGACGCTG  
CTGACGATCGAGTCCGGCGTGTTCGAGGTAAGGCAACCGCGGGTGACACGCACCTTGGCGGCGAGGACT  
TCGACAACCGTCTCGTCTGACTACTCGCCACTGAGCTCAAGATGCGCTGCGGCAAGGACTGCCGTGGCAAC  
GCCCCGCGCACGCGCCGGTCTGCGCACGGCGTGCAGCGCGTGAAGCGCACGCTGTCCAGCTCCACGACG  
GCAAACATCGAGATTGACGCGTGTACGAGGGCAATGACTTCTTCTCGAAGATCACGCGCGCGCTTCG  
AGGAGATGTGCCGCGATCAGTTTGAAGTGCCTCGAGCCGGTGAAAAAGGTGCTGGCAGATGCGGATAT  
GAAGCCGACGAGCGTGGACGACGTCGTCCTCGTTCGGCGGATCGACCCGAATCCCAAAGATCCAGCAGATT  
GTCTCGCAGTTCTTCGGCGGCAAGGAGCTGAACCGCTCCATCAACCCCGATGAGGCCGTTGCGTACGGTG  
CGGCGGTGCAGGCGCACATTCTCGCCGGCGGTCAATCCTCTAAGACTGACGGGCTGCTGCTGCTTACGCT  
GACGCGCTCTCGCTCGGTGTGGAGACATCCGGCGGTGTATGTCCGTGCTCATCCCGCGCAACTCGACG  
ATGCCGGTGCAAAAAGACGCGACACATACTCGAACAACGCCGATAATCAGCGTAACGTGGTGTATCAAGTGT  
ACGAAGGGGAGCGTCCGCTGGTTTCGAGTGTGAGTGCCTCGGCACCTTCACGCTGACCGACATCCCACC  
CATGCCGCGCGGCAAGGCGGCATCAACGTACGTTTCGACGTGAACACGGACGGCATCCTCATCGTGAGC  
GCCGTGAGGAGTCCGGTGGTTCGAAAGGAGGCCATCACGATCCAGAACGACACGGGCCGTCTGAGCAAGG  
AGCAGATCGAGAGCATGGTGCGGGAGGCCGAAAAGTTTGCTGAGGAGGACAGGATGAACAGCGAGCGCGT  
CGAGGCACGCAACACGCTGGAAAACCTACACCTTCTCCATGCGCGCCACCCTAGACGACCCGGATGTGCAG  
AATGGAATCACGAGGGGGACCGCCAGCAAATCCAGGACGCCGTCAACGCTGCCTCGAGCTGGCTTGA  
AAAACCGGGAGGCCACCAAGGAGGAGTACATGGAGCAGACGAAGCTGATCGAGGCATCGCGCACCGATT  
TTGTGCGAGTTCTACAAAAGCGTGTATGGAGGCCACCAAGCGCTGGGCCGAAGGACGGTGGCCCTC  
AGATGA

>X73119 235, 621 ubiquitin-fusion protein

ATGCAGATCTTCGTGAAGACGCTGACTGGCAAGACGATCGCGCTGGAGGTGGAGCCGAGCGACACGATCG

AAAACGTGAAGGCCAAGATCCAGGACAAGGAGGGCATCCCGCCGACCAGCAGCGCCTGATCTTCGCTGG  
CAAGCAGCTGGAGGAGGGCCGCACTCTCTCGACTACAACATCCAGAAGGAGTCCACGCTGCACCTGGTG  
CTGCGCCTGCGCGGTGGCGTGATGGAGCCGACGCTGGTCGCGCTGGCCAAGAAGTACAACCTGGGAGAAGA  
AGGTGTGCCGCCGCTGCTACGCCCCCTGCCGGTGC GCGCCACGAAGTCCCGCAAGAAGGCCTGCGGTCA  
CTGCTCCAACCTGCGCATGAAGAAGAAGCTGCGCTAG

>X73120 847, 1080 ubiC

ATGCAGATCTTCGTGAAGACGCTGACCGGCAAGACGATCGCGCTGGAGGTGGAGCCGAGCGACACGATCG  
AGAACGTGAAGGCCAAGATCCAGGACAAGGAGGGCATCCCGCCGACCAGCAGCGCCTGATCTTCGCGGG  
CAAGCAGCTGGAGGAGGGCCGACGCTCTCGACTACAACATCCAGAAGGAGTCCACGCTGCACCTGGTG  
CTGCGCCTGCGCGGGCGCCGTTAG

>X93566 120, 1451 beta-tubulin

ATGCGTGAGATCGTTTTCTGCCAGGCCGCGCCAGTGC GCGCAACCAGATCGGCTCTAAGTTTTGGGAGGTGA  
TTGCCGACGAACATGGTGTGATCCGACTGGCTCCTACCAGGGTGA CTGGATCTGCAGCTGGAGCGCAT  
CAACGTGTA CTTCGATGAGTCGGCGGGAGGCCGCTACGTGCCGCGCGCCGTGCTGATGGACCTCGAGCCC  
GGCACTATGGACTCCGTTTCGCGCCGCCCCGTACGGCCAGCTGTTCCGCCCGGACAACCTTCATCTTTGGTC  
AGTCCGGCGCTGGCAACAAC TGGGCCAAGGGCCACTACACTGAGGGTGC GGAGCTGATCGACTCCGTGCT  
TGATGTGTGCCGCAAGGAGGCGGAGAGCTGCGACTGCCTGCAGGGCTTCCAGCTGTCTCACTCCCTCGGC  
GGCGGCACGGGCTCCGGCATGGGCACGCTGCTCATTTC AAGCTGCGCGAGGAGTACCCGGACCGGATCA  
TGATGACCTTCTCCGTATCCCGTCCCCCGCGTGTCCGATAACCGTTGTGGAGCCGTACAACACGACCCT  
CTCTGTGCACCAGCTCGTGGAGAACTCCGACGAGTCCATGTGCATCGACAACGAGGGCGTGTACGATATT  
TGCTTCCGCACGCTGAAGCTGACGACGCCGACGTTCCGGT GACCTGAACCACCTCGTCGCCGCTGTGATGT  
CTGGCGTGACCTGCTGCCTGCGCTTCCCTGGCCAGCTGAACTCTGACCTGCGCAAGCTTGCCGTGAACCT  
CGTGCCGTTCCCGCGCCTGCACTTCTTCATGATGGGCTTCGCGCCGCTGACGAGCCGCGGCTCGCAGGAG  
TACCGCGGTCTGTCCGTGCGGGAGCTGACGCAGCAGATGTTCCGACGCCAAGAACATGATGCAGGCCGCCG  
ACCCGCGCCACGGCCGCTACCTACCGCGTCCGCGCTGTTCCGCGGCCGATGTGACCAAGGAGGTGGA  
CGAGCAGATGCTGAACGTGCAGAACAAGA ACTCCAGCTACTTCATCGAGTGGATCCCGAACAACATCAAG  
TCGTCCATCTGCGATATCCCGCCCAAGGTCTCAAGATGTCTGTACCTTCATCGGCAACAACACCTGCA  
TCCAGGAGATGTTCCGCCGGTCCGGT GAGCAGCTCACGGTATGTTCCGCCGCAAGGCCTTCTCCACTG  
GTACACCGGTGAGGGCATGGACGAGATGGAGTTCACGGAGGCCGAGTCCAACATGAACGACCTCGTCTCT  
GAGTACCAGCAGTACCAGGACGCCACCGTCGAGGAGGAGGGCGAGTACGACGAGGAGGAGGCCTACT  
AG

>X93567 73, 1404 L.major mRNA for beta-tubulin (1404bp)

ATGCGTGAGATCGTTTTCTGCCAGGCCGCGCCAGTGC GCGCAACCAGATCGGCTCCAAGTTTTGGGAGGTGA  
TTTCGGACGAACATGGTGTGACCCGACTGGCACCTACCAGGGCGACTCGGATCTGCAGCTGGAGCGCAT  
CAACGTCTACTTCGATGAGTCGACGGGAGGCCGCTACGTGCCGCGCGCCGTGCTGATGGACCTCGAGCCC  
GGCACTATGGACTCCGTTTCGCGCCGCCCCGTACGGCCAGCTGTTCCGCCCGGACAACCTTCATCTTTGGTC  
AGTCCGGCGCTGGCAACAAC TGGGCCAAGGGCCACTACACTGAGGGCGCGGAGCTGATCGACTCCGTGCT  
TGATGTGTGCCGCAAGGAGGCGGAGAGCTGCGACTGCCTGCAGGGCTTCCAGCTGTCTCACTCCCTCGGC  
GGCGGCACGGGCTCCGGCATGGGCACGCTGCTCATTTC AAGCTGCGCGAGGAGTACCCGGACCGGATCA  
TGATGACCTTCTCCGTATCCCGTCCCCCGCGTGTCCGATAACCGTTGTGGAGCCGTACAACACGACCCT  
CTCTGTGCACCAGCTCGTGGAGAACTCCGACGAGTCCATGTGCATCGACAACGAGGGCGTGTACGATATT  
TGCTTCCGCACGCTGAAGCTGACGACGCCGACGTTCCGGT GACCTGAACCACCTCGTCGCCGCTGTGATGT  
CTGGCGTGACCTGCTGCCTGCGCTTCCCTGGCCAGCTGAACTCTGACCTGCGCAAGCTTGCCGTGAACCT  
CGTGCCGCTCCCGCGCCTGCACTTCTTCATGATGGGCTTCGCGCCGCTGACGAGCCGCGGCTCGCAGCAG  
TACCGCGGTCTGTCCGTGCGGGAGCTGACGCAGCAGATGTTCCGACGCCAAGAACATGATGCAGGCCGCCG

ACCCGCGCCACGGCCGCTACCTCACCGCTCCGCGCTGTTCCGCGGCCGCATGTCGACCAGGGAGGTGGA  
CGAGCAGATGCTGAACGTGCAGAACAAGAACTCCAGTTACTTCATCGAGTGGCTCCCGAACAACATCAGG  
TCGTCCATCTGCGATATCCCGCCAAGGGTCTCAAGATGTCCGCCACCTCCATCGGAAACAACACCTGCA  
TCCAGGAGATGTTCCGCGGGTCCGGTGAGCAGCGCACGGGTATGTTCCGACGGAAGGCCTTCTGCACTG  
GTACACCGGTGAGGGCATGGACGAGATGGAGTTCACGGAGGCCGAGTCCAACATGAACGACCTCGTCTCT  
GAGTACCAGCAGTACCAGGACGCCACCGTCGAGGAGGAGGGCGAGTACGACGAGGAGGAGGCCTACT  
AG

>X97072 246, 785 ARL3

ATGGGCCTTCTCACACTCCTTCGAAAGCTCAAAAAGAGCGAAACAGAGCCACGCATGCTGATTCTGGGCC  
TCGATAATGCTGGCAAAACTTCCATTCTCCGCAAGCTGTCCGACGAGGACCCTACCACCACCCAGGCGAC  
TCAGGGATTCAACATCAAATCCATCAACTGTGAGGGCTTTAAGTTGAACATGTGGGATATTGGTGGCCAG  
AAGGCGATCCGCACGTACTGGCCAACTACTACGATGAAGTGGATTGCCTGATTTACGTTGTCGATGCTG  
CCGACCGGCGCCGCTCGAGGAGACTTCCGCGGAGCTTGACACCCTTCTGCAGGAAGAAAAGCTCCGTCA  
GGCCCTGTACTTATTTTCTCCAACAAGTGCACCTCGCCACTGCACTGTCCCCGAAAAATGTAAGCACA  
GCACTCAATTTGCACAGCTTGC GCGATCGCACGTGGTCTATCCAGAAGTGCAGCGCGAAAACCGGTGAGG  
GCCTGCATGAAGGTCTGGAGTGGGCGGTGAAGAACCTTAAGCCCGCTGA

>Y00647 199, 2007 mature gp63 protein (AA 61-563)

ATGTCCGTGGACAGCAGCAGCACGCACCGGCGCCGCTGCGTCGCCGCGCGCCTGGTGGCCTCGCGGCTG  
CCGGCGCCGAGTACCGTTGCTGTCGGCACCGCGCCGCTGGGCACACGCCGGTGGCTGCAGCACCG  
CTGCGTCCACGACGCGATGCAGGCACGCGTGC GGCAGTCCGTGGCGGACCACCACAAGGCCCCCGGCGCG  
GTGTCCGCGGTGGGTCTGCCGTACGTTACTCTCGACGCCGCGCACACCGCGGCCGCGCGATCCCAGGC  
CGGGCAGCGCGCGCAGCGTCTGCGCGACGTGAACTGGGGCGCGCTGCGCATCGCCGCTCCACCGAGGA  
CCTCACCGACCCCGCTACCACTGCGCTCGCGTCGGGCAGCATGTCAAAGACCACGCCGGCGCCATCGTC  
ACCTGCACCGCCGAGGACATCCTCACCAACGAGAAGCGCGACATCCTGGTCAAGCACCTCATCCCGCAGG  
CGGTGCAGCTGCACACGGAGCGGCTGAAGGTGCAGCAGGTGCAGGGCAAGTGAAGGTGACGGACATGGT  
CGGGCAGATCTGTGGGCACTTCAAGGTGCCGAGGCGCACATCACCGAGGGCTTCAGCAACACCGACTTC  
GTGATGTACGTCGCCTCCGTGCCGAGTGAGGAGGGTGTGCTGGCGTGGGCCACGACCTGCCAGACGTTCT  
CTGACGGCCATCCAGCCGTGGGCGTCATCAACATCCCCGCGGCAACATTGCGTCGCGGTACGACCAGCT  
CGTCACGCGTGTGTCACGCACGAGATGGCGCACGCGCTCGGCTTCAGCGGCCATTCTTCGAGGACGCC  
CGCATCGTGGCGAACGTTCCGAACGTTCCGAGGCAAGAACTTCGATGTTCCCGTGATCAACAGCAGCACGG  
CAGTGGCGAAGGCGCGGAGCAGTACGGCTGCGACACCTTGAGTATCTGGAGGTGGAGGACCAGGGCGG  
TGCGGGCTCCGCCGGTCCGACATCAAGATGCGCAACGCGCAGGACGAGCTCATGGCGCCTGCTGCAGCT  
GCCGGTACTACACCGCCCTGACCATGGCCATCTTCCAGGACCTCGGCTTCTACCAGGCGGACTTCAGCA  
AGGCCGAGGTGATGCCGTGGGGCCAGAACGCCGGTGC GCGCTTCTCACCAACAAGTGCATGGAGCAGAG  
CGTCACGCAGTGGCCGGCGATGTTCTGCAATGAGAGCGAGGACGCCATCCGCTGCCCCACCAGTCGTCTC  
AGCCTCGGTGCATGCGGTGTTACCCGTCACCCGGGCTTCCGCGTACTGGCAGTACTTCACGGACCCGT  
CCCTCGCCGGCGTCTCCGCCTTCATGGACTACTGCCCTGTGCTGGTGCCTACAGTGATGGCAGCTGCAC  
GCAGCGTGCCTCTGAGGCACATGCTTCGTTGCTGCCCTTCAACGTCTTCTCTGACGCGGCGCGCTGCATC  
GATGGTGCCTTCAGACCGAAGGCAACTGACGGCATAGTCAAGTCGTACGCCGGCCTGTGCGCCAACGTGC  
AGTGTGACACGGCCACACGCACGTACAGCGTGCAGGTGCACGGCAGTAACGACTACACCAACTGCACGCC  
GGGCCTCAGAGTTGAGCTGAGCACCGTGAGCAACGCCTTCGAGGGGGGGCGGCTACATCACGTGCCCGCCG  
TACGTGGAGGTGTGCCAGGGCAACGTGCAGGCTGCCAAGGACGCGGCAACACGGCGGCTGGTCTGCTG  
GTCCGCGCGCCGCGGCGACGGCGCTGCTGGTGGCCGCGCTGCTGGCCGTGGCGCTCTAG

>Y13576 128, 661 cyclophilin

ATGCCTTACACGCCGCACTACCCTGTCGTTGAATCCAACCCCAAGGTTTGGATGGATATCGACATCGGTG

GCAAGCCCCGGCCGCGTAACGATGGAGCTCTTCAAGGACGCCGTTCCCCAGACGGCCGAGAACTTCCG  
CGCGCTGTGCACGGGCGAGAAGGGCTTCGGCTACGCCAACTCCCCGTTCCACCGTGTGATCCCGGATTTCC  
ATGTGCCAGGGTGGTGACTTACCAACGGCAACGGCACTGGCGGCAAGTCCATCTACGGCTCCAAGTTTG  
CCGATGAGTCCTTTCTCGGCAAGGCCGGCAAGCACTTCGGCCCAGGCACGCTGTGATGGCCAATGCCGG  
CCCCAACACGAACGGCTCTCAGTTCTTCTGTGCACAGCGCCACGAGCTGGCTGGACGGCAAGCACGTC  
GTGTTCCGGCCAGGTGCTGGAGGGCTATGAAGTGGTCAAGGCTATGGAGGCCGTCGGCAGCCGACGGCA  
CCACCTCGAAGCCCGTGC GCGTGTCTGCCTGCGGGCAGCTTTAA

>Z14232\_0 511, 897 Ubiquitin

ATGCAGATCTTCGTGAAGACGCTGACCGGCAAGACGATCGCGCTGGAGGTGGAGCCGAGCGACACGATCG  
AGAATGTGAAGGCCAAGATCCAGGACAAGGAGGGCATCCCGCCGACCAGCAGCGCTGATCTTCGCCGG  
CAAGCAGCTGGAGGAGGGCCGACGCTCTCGGACTACAACATCCAGAAGGAGTCCACGCTGCACCTGGTG  
CTGCGCCTGCGCGGCGGC

>Z14232\_1 739, 897 ubiquitin tail protein

GTGATGGAGCCGACGCTGGTTCGCGCTGGCCAAGAAGTACAACCTGGGAGAAGAAGGTGTGCCGCCGCTGCT  
ACGCCCCGCTGCCGGTGC GCGCCACGAACTGCCGCAAGAAGGCCTGCGGTCACTGCTCCAACCTGCGCAT  
GAAGAAGAAGCTGCGCTAA

>Z28408 71, 385 L30-like ribosomal protein

ATGGCCAAGAAGACGAAGTCTAAGGTGAACACGATCAACGCCAAGCTCCAGCTGGTGATGAAGTCCGGTA  
AGTACGTGCTCGGAACGCAGCAGGCGCTGACGACCCTCCGTGAGGGCCGAGCAAGCTGGTTGTGATCGC  
CAACAACCTGCCCCGGATCCGCCGCGCCGAGGTGGAGTACTACTGCACCCTCAGCAAGACCCCCATCCAC  
CACTACTCTGGCAACAACCTGGACCTCGGTACGGCGTGC GCGCAAGCCATTCCGCACATGCGTCCTGTCCG  
TGACAAATGTTGGGGACTCCGACATCGCTACCTAA

>Z38058 2172, 4775 100 kDa heat shock protein (Hsp100)

ATGACGACGCAGCAGCCAGAATGGAAGCAGGCGCGCTCGGACTTGATGGCTCGCATGGCGGCACTGGCAC  
GCAAGAAGGCAAACGGCTACCTCGACCCCGTGCATCTCGCCTACGTCATGTTTGAAGATGAAAACAGTCT  
TGCTTCCCGTGCCGTGCGCAAACTCGGTGCCGCTCAGTCAAGGACGGACTGGAGGCGCGTGTGACGCG  
ATTCCCAACCAGATGCCTGCGCCACGCAGCCGCGGCCAACTCGGACATGATGCGTGTGATGAACACGG  
CGGAGCAGGAGCGTGTGCCCTCGGTGACACCCTCATGGCCGCTGACCACTTCTCCTGACCCTGCACGA  
GAGCAAGGAGGTTGGAAGAATCCTGGATGCTGCAGGGGCTGGAAAGAAGGCGATTCCGCGCCACGCTGCTC  
GAGATGCGCAAGGGGAAAAAGATAACCTCCGACTTCCAAGACGACAACACTACGAGTCGCTGAACAAGTACG  
CAGTTGATCTCTGCAAGCAGGCGGAGGACGGAAAGCTGGACCCGGTTATTGGTTCGCGCAGACGAGATTCT  
GCGCACTATCCGCGTGTGTCACGCCGACCAAGAACAACCCGGTGTATTATCGGGGAGCCTGGAGTGGGT  
AAGACCGCGATTGTGGAGGGCATTGCGCAGCAGGTGGTGC GAGGCGACGTGCCGGACACCCTCTCCGGTA  
TTCGCATCTTCTCACTGGACATGGGCGCGCTGATCGCCGGTGCCAAGTACCGCGGCGAGTTCGAGGAGCG  
CCTGAAGGCCGCTGCTGAATGAGGTGAAGGAAAGCGACAATAAGATCATTCTTTATTGTCGAGATCCAC  
CTCGTGCTCGGCGCCGCAAGTCCGACGGCGCGATGGACGCCGGAATCTGCTGAAGCCGCTGCTGGCCC  
GTGGCGACGTGCGCACGATCGGTGCCACAACGCTCGAGGAGTACCGCCAGTACGTGGAGAAGGACGCCGC  
CTTCGAGCGCCGCTTCATGCCAGTGCAGGTGCATGAGCCGTGATCGAGGAGTGCACGAGCATCCTGCGT  
GGTCTGAAAGACCGCTACGAGCAGCACCACGGTGTGCAGATCACGGACAAGGCCGTTGTGCTGGCGGCGC  
AGTTGGCTGGCCGCTACATTACGAACCGCTTCTGCGGATAAGGCGATTGACCTCATTGATGAAGCGTG  
CGCCAACGTGCGCGTGACGCTGTCGTGCGGCGCGCCGAAATCGACGCCCTCGAGCGCAAGAAGCGCCAG  
CTGGAGATCGAGGAGAGGGCACTGCAGCGGACAAGGACGCATCGGCCAAGGAGCGGCTGAAAGCCGTGA  
AGGCGGAGATTGAGAAGGTGGAGGAGAACTTGGCCCTCTACTTGCCAAGTACGAACAGGAGCGTGGCCG  
TATTGACGAGCTGCAGGCAACGCAGGCAAAGCTGGACGAGAAGAAGGTGAAGCTGGAGCGGGCAGAGCGG  
ATGCGCGACATGGAGACGGCAGCAGACCTCAAATACCGCGTCATCCCAATCCTCCAGGACAGGATCCGAT

CCCTCAAGGAGGCGATCGAGAAGCAGAAGGCGACGATGCTGCAGGGCACCGTGACCGGGACGGACATCGC  
CACCGTTGTGTCGCGCTGGACCAATATCCCGGTGACAAAGCTGAGCCAGACCGAACGCGAGCGCCTGTTG  
CACCTGGCCGACCAGCTGCACCTCCGTGTGAAGGGCCAGGATGAGGCGGTGAGCCGTGTCGCGGAGGCCA  
TTCTGCGCTCACGTGCCGGCCTGGCCCGTTCCGACCGGCCACCGGCTCTTTCTGTTTCTCGGTCCCAC  
CGGCGTGGGCAAGACAGAGCTATCCAAGGCCGTTGCCTCAGAGCTCTTCGACGACGCCAAGTACATGGTG  
CGACTTGACATGAGCGAGTACATGGAGCAGACTCTGTGGCGCGGCTGATCGGCACCCCGCGGGGTACG  
TCGGCCACGAAGAAGGTGGCCAGCTGACGGAGCCGGTGCGCCGTGCGCCATACACGGTGGTGCTGCTGGA  
TGAAGTGGAAAAGGCGCACCCGAACGTCTTCAACGTAAGTGTGCAGGTGCTCGACGACGGGCGGTTGACT  
GACTCGCACGGCCGAACCGTGGATTTCTGCAACACGATCATCATGACATCCAACCTGGGTGCGCAGT  
ATCTGCAGAACATGGACACCTCACCGAAGCCGTACGAAGTGGCACAGGCACAGGTGATGGGCGAGGTAAG  
GAAGTTCTTTGCGCCGGAGTTCATCAACCGACTGGACGACATCATCCTCTTCCGCTCTCTGGGCTTAAAG  
GAGATGACCGGCATCATCGACCTCATCACAGAGGAGCTCAATGGCCGCTCAAGGACCAGTCCATCCGGG  
TCTCCCTCACCGAAGAGGCCAAGCAGTACGTATTGGAGTCCGCCTTCGACGCGGATATGGGCGCTCGCC  
GCTACGGCGCTGGGTTGAGAAGAACATTACAACAGAGCTCAGCCGATGATCATCTCGCAAGAGCTGTCG  
CCGAACAGCACAGTAAAAGTGACTCTCAGCAGCAATCATAAAAAGCTCTCTTTCTCGGTGAAGCGGACGG  
CGGCGCAGACATGA

>Z86100 1, 450 hydrophilic surface protein 1

GAGACCAACCAGGGAGGGAATGCGAGTGGCTCCCGAAGAGCGCCGGCGGTCCGACCAACGAATATGACC  
CGAAGGATGATGGCTTCACGCCGAACAACGAAGACTGTTGCCCGAAGGAGGATGGCCATACAGGGAAGAA  
CGATGACGGTGGCCCGAAGGAGGATGGCCATGCGCCGAAGAACGATGACCATGCCCCGAAGGAGGATGGC  
CATGCGCCGAAGAACGATGACCATGCCCCGAAGGAGGATGGCCATGCGCCGAAGAACGATGACCATGCC  
CGAAGGAGGATGGCCATGCGCCGAAGAACGATGACCATGCCCCGAAGGAGGATGGCCATGCGCCGAAGAA  
CGATGACCATGCCCCGAAGGAGGATGGCCATGCGCCGAAGAACGATGACCATGCCCCGAAGGAGGATGGC  
CATGCGCAGAAGAACGACGGGGATGTGCAG

>Z86101 1, 282 hydrophilic surface protein 1

GAGACCAACCAGGGAGGGAATGCGAGTGGCTCCCGAAGAGCGCCGGCGGTCCGACCAACGAATATGACC  
CGAAGGATGATGGCTTCACGCCGAACAACGAAGACTGTTGCCCGAAGGAGGATGGCCATACAGGGAAGAA  
CGACGACGGTGGCCCGAAGGAGGATGGCCATGCGCCGAAGAACGATGACCATGCCCCGAAGGAGGATGGC  
CATGCGCCGAAGAACGATGACCATGCCCCGAAGGAGGATGGCCATGCGCAGAAGAACGACGGGGATGTGC  
AG

>Z86102 1, 408 hydrophilic surface protein 1

GAGACCAACCAGGGAGGGAATGCGAGTGGCTCCCGAAGAGCGCCGGCGGTCCGACCAACGAATATGACC  
CGAAGGATGATGGCTTCACGCCGAACAACGAAGACTGTTGCCCGAAGGAGGATGGCCATACAGGGAAGAA  
CGACGACGGTGGCCCGAAGGAGGATGGCCATGCGCCGAAGAACGATGACCATGCCCCGAAGGAGGATGGC  
CATGCGCCGAAGAACGATGACCATGCCCCGAAGGAGGATGGCCATGCGCCGAAGAACGATGACCATGCC  
CGAAGGAGGATGGCCATGCGCCGAAGAACGATGACCATGCCCCGAAGGAGGATGGCCATGCGCCGAAGAA  
CGATGACCATGCCCCGAAGGAGGATGGCCATGCGCCGAAGAACGACGGGGATGTGCAG

>gi|28565603:969-1541 Leishmania major ribosomal protein S5 gene

cluster, complete sequence

ATGAGCAGCAAGACTCCCAAGCTCTTCAACAAGTGGTCGTTTCGAGGGCCTCGAGACGTCGGAGCTGGCC  
TCCGCGACCACATCTCGACGACGGCCGCGTATGTGCCGCACACGTCCGGCCGCTGGCAGAAGCGCCGCTT  
CTACAAGGCCCGCATGCCGATTGTCGAGCGTCTGGCCAACGGCCTGATGTTCAAGGGCCGCGCAACGGT  
CGCAAGCTGCAGGCTGCGCGTCTGCTGAAGCACACACTGGAAATCATCCACCTGCTGACGGACGAGAACC  
CCCTGCAGGTTGTTGTGGACGCGGTGTCGAAGGGGGCGCCGCTGAGGACTCGACCCGCTCGGCTCCGG  
TGGTGTGTGCGCCGACGCTGTGGATGTGTCACCGATGCGCCGCGTGAATGAGGCGATCTACCAGATG

TGCAAGGGCGCGGTGAGGCTGCCTTCCGCAACCTGAAGTCGATGCCGGAGTGCCTCGCGGACGAGATCG  
TGAACGCGTCCAAGGGTAGCTCGAACTCCTACGCCATCAAGAAGAAGGATGAGGTGGAGCGCGTGGCCAA  
GGCTAACCGGTAA
