# Supplementary material for: A computational investigation of kinetoplastid trans-splicing
Source: PubMed Central journal article supplement (PMC1297651; doi:10.1186/gb-2005-6-11-r95), 2005-10-17
Supplement: gb-2005-6-11-r95-S4.pdf [file gb-2005-6-11-r95-S4.pdf]

## Complete Predictions for Chromosomes 1 and 3

The complete set of splice site predictions for chromosomes 1 and 3 are included below. For each splice site, we provide the following information:

Splice\_346 253904 253905 1.797 Predicted splice site

Splice\_346 is our internal identifier for a given splice site prediction, and the next two values represent the chromosomal positions (start and end) of the putative splice site. The fourth column includes the z-score, which as discussed in the main manuscript, is a measure of the likelihood that the predicted splice site is a functional site. The higher the z-score, the more likely the site is functional. We then include a short annotation of the splice site.

For open reading frames, our internal identifier is of the form `lmaj_01_084` where the last three digits indicate that this is the 84th ORF on chromosome 1 (indicated by `lmaj_01`). We include the annotation present in the public version of the genome sequence as well as the publicly reported start and end of the ORF. ORFs do not have a likelihood value assigned to them for obvious reasons.

## Predictions for the Forward Strand of Chromosome 1

|           |       |       |       |                       |
|-----------|-------|-------|-------|-----------------------|
| Splice_1  | 1403  | 1404  | 1.698 | Predicted splice site |
| Splice_2  | 1957  | 1958  | 1.783 | Predicted splice site |
| Splice_3  | 2159  | 2160  | 1.621 | Predicted splice site |
| Splice_4  | 3020  | 3021  | 2.204 | Predicted splice site |
| Splice_5  | 3715  | 3716  | 1.621 | Predicted splice site |
| Splice_6  | 4448  | 4449  | 1.713 | Predicted splice site |
| Splice_7  | 5301  | 5302  | 1.554 | Predicted splice site |
| Splice_8  | 9263  | 9264  | 1.668 | Predicted splice site |
| Splice_9  | 9410  | 9411  | 1.520 | Predicted splice site |
| Splice_10 | 14061 | 14062 | 2.073 | Predicted splice site |
| Splice_11 | 17610 | 17611 | 1.797 | Predicted splice site |
| Splice_12 | 17703 | 17704 | 1.668 | Predicted splice site |
| Splice_13 | 18051 | 18052 | 2.395 | Predicted splice site |
| Splice_14 | 18644 | 18645 | 1.769 | Predicted splice site |
| Splice_15 | 18933 | 18934 | 1.605 | Predicted splice site |
| Splice_16 | 20163 | 20164 | 1.769 | Predicted splice site |
| Splice_17 | 22934 | 22935 | 1.501 | Predicted splice site |
| Splice_18 | 23855 | 23856 | 1.797 | Predicted splice site |
| Splice_19 | 24187 | 24188 | 1.572 | Predicted splice site |
| Splice_20 | 24284 | 24285 | 1.537 | Predicted splice site |
| Splice_21 | 25975 | 25976 | 1.728 | Predicted splice site |
| Splice_22 | 26122 | 26123 | 1.537 | Predicted splice site |
| Splice_23 | 26405 | 26406 | 1.945 | Predicted splice site |
| Splice_24 | 28010 | 28011 | 1.605 | Predicted splice site |
| Splice_25 | 29756 | 29757 | 1.849 | Predicted splice site |
| Splice_26 | 33534 | 33535 | 1.910 | Predicted splice site |
| Splice_27 | 35595 | 35596 | 1.637 | Predicted splice site |
| Splice_28 | 35699 | 35700 | 2.150 | Predicted splice site |
| Splice_29 | 36898 | 36899 | 2.450 | Predicted splice site |
| Splice_30 | 39673 | 39674 | 1.742 | Predicted splice site |
| Splice_31 | 40398 | 40399 | 2.350 | Predicted splice site |
| Splice_32 | 41054 | 41055 | 1.698 | Predicted splice site |
| Splice_33 | 41114 | 41115 | 1.588 | Predicted splice site |
| Splice_34 | 42925 | 42926 | 1.637 | Predicted splice site |
| Splice_35 | 43300 | 43301 | 1.554 | Predicted splice site |
| Splice_36 | 43801 | 43802 | 1.621 | Predicted splice site |
| Splice_37 | 47567 | 47568 | 2.064 | Predicted splice site |
| Splice_38 | 48633 | 48634 | 1.637 | Predicted splice site |
| Splice_39 | 52578 | 52579 | 1.698 | Predicted splice site |
| Splice_40 | 52846 | 52847 | 1.809 | Predicted splice site |
| Splice_41 | 53242 | 53243 | 1.957 | Predicted splice site |
| Splice_42 | 53481 | 53482 | 1.554 | Predicted splice site |
| Splice_43 | 53553 | 53554 | 1.520 | Predicted splice site |

|             |       |       |       |                                  |
|-------------|-------|-------|-------|----------------------------------|
| Splice_44   | 53981 | 53982 | 1.835 | Predicted splice site            |
| Splice_45   | 54060 | 54061 | 1.588 | Predicted splice site            |
| Splice_46   | 54407 | 54408 | 2.033 | Predicted splice site            |
| Splice_47   | 54585 | 54586 | 1.769 | Predicted splice site            |
| Splice_48   | 54735 | 54736 | 1.637 | Predicted splice site            |
| Splice_49   | 54839 | 54840 | 2.150 | Predicted splice site            |
| Splice_50   | 56185 | 56186 | 1.934 | Predicted splice site            |
| Splice_51   | 56276 | 56277 | 1.769 | Predicted splice site            |
| Splice_52   | 56963 | 56964 | 1.756 | Predicted splice site            |
| Splice_53   | 59873 | 59874 | 2.103 | Predicted splice site            |
| Splice_54   | 60173 | 60174 | 1.861 | Predicted splice site            |
| Splice_55   | 60854 | 60855 | 1.520 | Predicted splice site            |
| Splice_56   | 63980 | 63981 | 1.683 | Predicted splice site            |
| Splice_57   | 67225 | 67226 | 1.783 | Predicted splice site            |
| Splice_58   | 69108 | 69109 | 2.221 | Predicted splice site            |
| Splice_59   | 69620 | 69621 | 1.572 | Predicted splice site            |
| Splice_60   | 70266 | 70267 | 2.122 | Predicted splice site            |
| Splice_61   | 70991 | 70992 | 1.957 | Predicted splice site            |
| Splice_62   | 71226 | 71227 | 2.221 | Predicted splice site            |
| Splice_63   | 71551 | 71552 | 2.221 | Predicted splice site            |
| Splice_64   | 73859 | 73860 | 1.979 | Predicted splice site            |
| Splice_65   | 74412 | 74413 | 2.073 | Predicted splice site            |
| Splice_66   | 75627 | 75628 | 1.668 | Predicted splice site            |
| Splice_67   | 75894 | 75895 | 1.653 | Predicted splice site            |
| Splice_68   | 76162 | 76163 | 2.064 | Predicted splice site            |
| Splice_69   | 76629 | 76630 | 1.769 | Predicted splice site            |
| Splice_70   | 77599 | 77600 | 1.823 | Predicted splice site            |
| lmaj_01_032 | 79144 | 80067 | 0     | poly(A) export protein, putative |
| Splice_71   | 79316 | 79317 | 1.637 | Predicted splice site            |
| Splice_72   | 80301 | 80302 | 1.874 | Predicted splice site            |
| Splice_73   | 80469 | 80470 | 2.288 | Predicted splice site            |
| lmaj_01_033 | 80534 | 81163 | 0     | hypothetical protein, conserved  |
| Splice_74   | 81253 | 81254 | 1.501 | Predicted splice site            |
| Splice_75   | 81312 | 81313 | 1.605 | Predicted splice site            |
| Splice_76   | 81545 | 81546 | 2.093 | Predicted splice site            |
| Splice_77   | 81635 | 81636 | 1.501 | Predicted splice site            |
| lmaj_01_034 | 81748 | 82041 | 0     | hypothetical protein, conserved  |
| Splice_78   | 81967 | 81968 | 1.835 | Predicted splice site            |
| Splice_79   | 82099 | 82100 | 1.588 | Predicted splice site            |
| Splice_80   | 82498 | 82499 | 1.849 | Predicted splice site            |
| Splice_81   | 82804 | 82805 | 1.683 | Predicted splice site            |
| Splice_82   | 83140 | 83141 | 3.068 | Predicted splice site            |

lmaj\_01\_035 83340 84116 0 hypothetical protein,  
 conserved  
 Splice\_83 83644 83645 1.756 Predicted splice site  
 Splice\_84 83968 83969 2.372 Predicted splice site  
 Splice\_85 84098 84099 2.327 Predicted splice site  
 Splice\_86 84232 84233 1.588 Predicted splice site  
 Splice\_87 85072 85073 2.093 Predicted splice site  
 lmaj\_01\_036 85900 88104 0 hypothetical protein,  
 unknown function  
 Splice\_88 86583 86584 1.605 Predicted splice site  
 Splice\_89 88258 88259 1.637 Predicted splice site  
 Splice\_90 88785 88786 2.001 Predicted splice site  
 Splice\_91 88921 88922 2.409 Predicted splice site  
 lmaj\_01\_037 88973 89542 0 hypothetical protein,  
 unknown function  
 Splice\_92 89124 89125 1.537 Predicted splice site  
 Splice\_93 89397 89398 1.728 Predicted splice site  
 Splice\_94 89704 89705 1.898 Predicted splice site  
 Splice\_95 89798 89799 1.742 Predicted splice site  
 Splice\_96 90030 90031 1.653 Predicted splice site  
 lmaj\_01\_038 90099 90665 0 hypothetical protein,  
 conserved  
 Splice\_97 90490 90491 1.756 Predicted splice site  
 Splice\_98 90745 90746 1.637 Predicted splice site  
 Splice\_99 91269 91270 3.013 Predicted splice site  
 lmaj\_01\_039 91350 93806 0 hypothetical protein,  
 conserved  
 Splice\_100 94022 94023 1.683 Predicted splice site  
 Splice\_101 94366 94367 1.501 Predicted splice site  
 Splice\_102 94597 94598 1.668 Predicted splice site  
 Splice\_103 94713 94714 1.989 Predicted splice site  
 lmaj\_01\_040 94759 97227 0 hypothetical protein,  
 conserved  
 Splice\_104 95717 95718 1.756 Predicted splice site  
 Splice\_105 97836 97837 2.113 Predicted splice site  
 Splice\_106 98157 98158 1.849 Predicted splice site  
 lmaj\_01\_041 98191 99870 0 hypothetical protein,  
 conserved  
 Splice\_107 98689 98690 2.168 Predicted splice site  
 Splice\_108 100012 100013 1.910 Predicted splice site  
 Splice\_109 100102 100103 1.861 Predicted splice site  
 Splice\_110 100496 100497 2.450 Predicted splice site  
 lmaj\_01\_042 100525 101127 0 ribosomal protein S7,  
 putative  
 Splice\_111 101480 101481 2.589 Predicted splice site

Splice\_112 101702 101703 2.239 Predicted splice site  
 Splice\_113 102413 102414 3.100 Predicted splice site  
 lmaj\_01\_043 102441 103043 0 ribosomal protein S7,  
 putative  
 Splice\_114 103202 103203 2.043 Predicted splice site  
 Splice\_115 103633 103634 2.043 Predicted splice site  
 Splice\_116 103781 103782 2.022 Predicted splice site  
 lmaj\_01\_044 103839 106070 0 hypothetical protein,  
 unknown function  
 Splice\_117 106491 106492 1.823 Predicted splice site  
 Splice\_118 106866 106867 2.288 Predicted splice site  
 Splice\_119 107066 107067 2.746 Predicted splice site  
 Splice\_120 107221 107222 1.537 Predicted splice site  
 lmaj\_01\_045 107435 109198 0 hypothetical protein,  
 unknown function  
 Splice\_121 107735 107736 2.012 Predicted splice site  
 Splice\_122 109569 109570 1.989 Predicted splice site  
 Splice\_123 109843 109844 2.673 Predicted splice site  
 Splice\_124 109951 109952 1.605 Predicted splice site  
 Splice\_125 110414 110415 1.554 Predicted splice site  
 Splice\_126 110971 110972 1.501 Predicted splice site  
 Splice\_127 111836 111837 2.150 Predicted splice site  
 Splice\_128 111980 111981 2.304 Predicted splice site  
 lmaj\_01\_046 112136 112792 0 alpha/beta-hydrolase-like  
 protein  
 Splice\_129 112164 112165 2.358 Predicted splice site  
 Splice\_130 112419 112420 1.756 Predicted splice site  
 Splice\_131 112995 112996 1.520 Predicted splice site  
 Splice\_132 113258 113259 1.742 Predicted splice site  
 Splice\_133 113537 113538 2.612 Predicted splice site  
 Splice\_134 113721 113722 2.204 Predicted splice site  
 Splice\_135 113787 113788 1.713 Predicted splice site  
 Splice\_136 114021 114022 2.715 Predicted splice site  
 Splice\_137 114287 114288 2.509 Predicted splice site  
 lmaj\_01\_047 114900 119180 0 hypothetical protein,  
 unknown function  
 Splice\_138 115087 115088 1.861 Predicted splice site  
 Splice\_139 115348 115349 1.769 Predicted splice site  
 Splice\_140 119520 119521 1.922 Predicted splice site  
 Splice\_141 119628 119629 1.849 Predicted splice site  
 Splice\_142 119790 119791 1.605 Predicted splice site  
 Splice\_143 119911 119912 2.296 Predicted splice site  
 Splice\_144 120267 120268 1.934 Predicted splice site  
 Splice\_145 120486 120487 2.358 Predicted splice site  
 Splice\_146 120566 120567 1.605 Predicted splice site

Splice\_147 120650 120651 1.945 Predicted splice site  
 Splice\_148 121414 121415 2.395 Predicted splice site  
 Splice\_149 121575 121576 2.395 Predicted splice site  
 Splice\_150 121725 121726 1.835 Predicted splice site  
 lmaj\_01\_048 121756 123846 0 fatty acyl CoA syntetase 1,  
 putative  
 Splice\_151 124285 124286 2.150 Predicted splice site  
 Splice\_152 124466 124467 1.861 Predicted splice site  
 Splice\_153 124538 124539 1.797 Predicted splice site  
 Splice\_154 124603 124604 1.698 Predicted splice site  
 lmaj\_01\_049 124708 125787 0 hypothetical protein,  
 conserved  
 Splice\_155 124720 124721 2.187 Predicted splice site  
 Splice\_156 125959 125960 2.230 Predicted splice site  
 Splice\_157 126042 126043 1.588 Predicted splice site  
 Splice\_158 126287 126288 2.204 Predicted splice site  
 Splice\_159 126795 126796 1.797 Predicted splice site  
 Splice\_160 126889 126890 1.537 Predicted splice site  
 Splice\_161 127032 127033 1.501 Predicted splice site  
 Splice\_162 127177 127178 2.437 Predicted splice site  
 Splice\_163 127683 127684 2.033 Predicted splice site  
 lmaj\_01\_050 127701 129797 0 long chain fatty acid  
 CoA ligase, putative  
 Splice\_164 129962 129963 2.168 Predicted splice site  
 Splice\_165 130228 130229 1.588 Predicted splice site  
 Splice\_166 130616 130617 1.683 Predicted splice site  
 Splice\_167 130842 130843 2.416 Predicted splice site  
 lmaj\_01\_051 130944 133067 0 fatty acyl CoA synthetase 2,  
 putative  
 Splice\_168 133210 133211 2.012 Predicted splice site  
 Splice\_169 133360 133361 2.033 Predicted splice site  
 Splice\_170 133446 133447 1.967 Predicted splice site  
 Splice\_171 133691 133692 1.967 Predicted splice site  
 Splice\_172 134355 134356 2.509 Predicted splice site  
 Splice\_173 134430 134431 1.835 Predicted splice site  
 Splice\_174 134640 134641 1.605 Predicted splice site  
 Splice\_175 135105 135106 1.945 Predicted splice site  
 Splice\_176 135470 135471 2.141 Predicted splice site  
 Splice\_177 136007 136008 2.320 Predicted splice site  
 Splice\_178 136191 136192 2.457 Predicted splice site  
 lmaj\_01\_052 136523 137107 0 fatty acyl CoA synthetase 2,  
 putative  
 Splice\_179 136986 136987 2.150 Predicted splice site  
 Splice\_180 137207 137208 2.122 Predicted splice site  
 Splice\_181 137510 137511 2.784 Predicted splice site

Splice\_182 137576 137577 1.605 Predicted splice site  
 lmaj\_01\_053 137708 139855 0 long chain fatty acid  
 CoA ligase, putative  
 Splice\_183 140167 140168 2.230 Predicted splice site  
 Splice\_184 140431 140432 1.945 Predicted splice site  
 Splice\_185 140605 140606 2.416 Predicted splice site  
 Splice\_186 140728 140729 2.312 Predicted splice site  
 Splice\_187 140786 140787 1.588 Predicted splice site  
 Splice\_188 140890 140891 2.150 Predicted splice site  
 Splice\_189 141036 141037 2.401 Predicted splice site  
 Splice\_190 141284 141285 1.989 Predicted splice site  
 Splice\_191 141417 141418 2.053 Predicted splice site  
 Splice\_192 141809 141810 2.073 Predicted splice site  
 Splice\_193 141870 141871 1.501 Predicted splice site  
 Splice\_194 142831 142832 1.945 Predicted splice site  
 Splice\_195 142998 142999 1.756 Predicted splice site  
 Splice\_196 143149 143150 2.483 Predicted splice site  
 Splice\_197 143330 143331 1.957 Predicted splice site  
 Splice\_198 143423 143424 1.572 Predicted splice site  
 Splice\_199 143633 143634 1.637 Predicted splice site  
 lmaj\_01\_054 143747 148570 0 long chain fatty acid  
 CoA ligase, putative  
 Splice\_200 147531 147532 1.605 Predicted splice site  
 Splice\_201 148767 148768 2.516 Predicted splice site  
 Splice\_202 149308 149309 2.652 Predicted splice site  
 lmaj\_01\_055 149668 151647 0 hypothetical protein,  
 unknown function  
 Splice\_203 151795 151796 1.797 Predicted splice site  
 Splice\_204 151907 151908 2.221 Predicted splice site  
 Splice\_205 152167 152168 2.033 Predicted splice site  
 Splice\_206 152692 152693 2.740 Predicted splice site  
 lmaj\_01\_056 152784 153653 0 hypothetical protein,  
 unknown function  
 Splice\_207 153215 153216 1.537 Predicted splice site  
 Splice\_208 154841 154842 2.113 Predicted splice site  
 Splice\_209 154918 154919 1.728 Predicted splice site  
 lmaj\_01\_057 154973 156835 0 hypothetical protein,  
 conserved  
 Splice\_210 157070 157071 1.742 Predicted splice site  
 Splice\_211 157326 157327 2.043 Predicted splice site  
 lmaj\_01\_058 157433 158413 0 tricarboxylate carrier,  
 putative  
 Splice\_212 157763 157764 2.001 Predicted splice site  
 Splice\_213 158769 158770 1.698 Predicted splice site  
 Splice\_214 158968 158969 1.898 Predicted splice site

Splice\_215 159100 159101 1.898 Predicted splice site  
 lmaj\_01\_059 159192 162101 0 hypothetical protein,  
 conserved  
 Splice\_216 159272 159273 1.520 Predicted splice site  
 Splice\_217 161778 161779 1.742 Predicted splice site  
 Splice\_218 162746 162747 1.621 Predicted splice site  
 Splice\_219 162898 162899 2.187 Predicted splice site  
 Splice\_220 163042 163043 2.380 Predicted splice site  
 Splice\_221 163160 163161 1.713 Predicted splice site  
 lmaj\_01\_060 163204 164478 0 mitochondrial RNA editing  
 ligase 1  
 Splice\_222 163224 163225 1.653 Predicted splice site  
 Splice\_223 163896 163897 1.537 Predicted splice site  
 Splice\_224 165049 165050 1.849 Predicted splice site  
 Splice\_225 165323 165324 1.885 Predicted splice site  
 Splice\_226 165559 165560 1.683 Predicted splice site  
 lmaj\_01\_061 165642 170996 0 hypothetical protein,  
 conserved  
 Splice\_227 166342 166343 1.520 Predicted splice site  
 Splice\_228 168236 168237 1.809 Predicted splice site  
 Splice\_229 171435 171436 2.073 Predicted splice site  
 lmaj\_01\_062 171999 172730 0 DNA-damage inducible  
 protein DDI1-like protein  
 Splice\_230 172807 172808 1.713 Predicted splice site  
 Splice\_231 173144 173145 2.893 Predicted splice site  
 Splice\_232 173225 173226 1.910 Predicted splice site  
 lmaj\_01\_063 173480 175255 0 hypothetical protein,  
 conserved  
 Splice\_233 176522 176523 2.740 Predicted splice site  
 Splice\_234 176651 176652 1.835 Predicted splice site  
 lmaj\_01\_064 177725 179602 0 hypothetical protein,  
 unknown function  
 Splice\_235 177981 177982 1.501 Predicted splice site  
 Splice\_236 179424 179425 1.572 Predicted splice site  
 Splice\_237 180186 180187 1.769 Predicted splice site  
 Splice\_238 180515 180516 1.554 Predicted splice site  
 Splice\_239 180897 180898 1.698 Predicted splice site  
 Splice\_240 181000 181001 1.861 Predicted splice site  
 Splice\_241 181061 181062 1.605 Predicted splice site  
 Splice\_242 181125 181126 1.683 Predicted splice site  
 Splice\_243 181278 181279 2.522 Predicted splice site  
 lmaj\_01\_065 181455 184793 0 HSP70-like protein  
 Splice\_244 181674 181675 1.797 Predicted splice site  
 Splice\_245 185061 185062 1.588 Predicted splice site  
 Splice\_246 185595 185596 2.490 Predicted splice site



lmaj\_01\_066 185782 187266 0 mitochondrial processing peptide beta subunit,  
Splice\_247 187473 187474 2.483 Predicted splice site  
Splice\_248 187886 187887 1.967 Predicted splice site  
Splice\_249 188140 188141 2.471 Predicted splice site  
Splice\_250 188251 188252 2.103 Predicted splice site  
lmaj\_01\_067 188565 193028 0 hypothetical protein, conserved  
Splice\_251 190394 190395 1.967 Predicted splice site  
Splice\_252 193601 193602 2.444 Predicted splice site  
Splice\_253 193707 193708 2.073 Predicted splice site  
Splice\_254 193818 193819 2.122 Predicted splice site  
Splice\_255 193927 193928 2.195 Predicted splice site  
Splice\_256 194036 194037 2.195 Predicted splice site  
lmaj\_01\_068 194043 194960 0 hypothetical protein, unknown function  
Splice\_257 195149 195150 2.571 Predicted splice site  
Splice\_258 195557 195558 3.068 Predicted splice site  
Splice\_259 195628 195629 1.783 Predicted splice site  
Splice\_260 195790 195791 2.168 Predicted splice site  
Splice\_261 196038 196039 2.335 Predicted splice site  
Splice\_262 196360 196361 2.813 Predicted splice site  
Splice\_263 197131 197132 2.836 Predicted splice site  
Splice\_264 197597 197598 2.012 Predicted splice site  
Splice\_265 197773 197774 1.683 Predicted splice site  
Splice\_266 197843 197844 1.769 Predicted splice site  
Splice\_267 198089 198090 1.945 Predicted splice site  
Splice\_268 198189 198190 1.520 Predicted splice site  
Splice\_269 198601 198602 1.957 Predicted splice site  
Splice\_270 198738 198739 2.187 Predicted splice site  
lmaj\_01\_069 198852 201254 0 hypothetical protein, unknown function  
Splice\_271 201626 201627 1.520 Predicted splice site  
Splice\_272 201831 201832 2.064 Predicted splice site  
Splice\_273 202691 202692 2.784 Predicted splice site  
Splice\_274 202767 202768 1.849 Predicted splice site  
lmaj\_01\_070 202892 203584 0 hypothetical protein, unknown function  
Splice\_275 203279 203280 1.501 Predicted splice site  
Splice\_276 203487 203488 1.520 Predicted splice site  
Splice\_277 203886 203887 2.416 Predicted splice site  
Splice\_278 204144 204145 2.595 Predicted splice site  
Splice\_279 204354 204355 1.835 Predicted splice site  
Splice\_280 204488 204489 1.756 Predicted splice site  
Splice\_281 204589 204590 1.637 Predicted splice site

Splice\_282 204707 204708 1.910 Predicted splice site  
 Splice\_283 204771 204772 1.605 Predicted splice site  
 Splice\_284 204879 204880 1.572 Predicted splice site  
 Splice\_285 205524 205525 1.572 Predicted splice site  
 Splice\_286 205614 205615 1.835 Predicted splice site  
 lmaj\_01\_071 206307 207071 0 hypothetical protein,  
 unknown function  
 Splice\_287 206571 206572 1.713 Predicted splice site  
 Splice\_288 206668 206669 1.668 Predicted splice site  
 Splice\_289 207147 207148 1.537 Predicted splice site  
 Splice\_290 207967 207968 1.698 Predicted splice site  
 Splice\_291 208415 208416 1.728 Predicted splice site  
 lmaj\_01\_072 208462 210087 0 ubiquitin activating enzyme,  
 putative  
 Splice\_292 210277 210278 2.064 Predicted splice site  
 Splice\_293 210510 210511 2.509 Predicted splice site  
 lmaj\_01\_073 210682 215415 0 hypothetical protein,  
 conserved  
 Splice\_294 211524 211525 1.572 Predicted splice site  
 Splice\_295 212913 212914 1.698 Predicted splice site  
 Splice\_296 213794 213795 1.621 Predicted splice site  
 Splice\_297 215120 215121 1.874 Predicted splice site  
 Splice\_298 215508 215509 1.934 Predicted splice site  
 Splice\_299 215768 215769 2.247 Predicted splice site  
 Splice\_300 216094 216095 2.450 Predicted splice site  
 Splice\_301 216230 216231 1.520 Predicted splice site  
 lmaj\_01\_074 216577 223302 0 hypothetical protein,  
 conserved  
 Splice\_302 216749 216750 1.572 Predicted splice site  
 Splice\_303 218626 218627 1.520 Predicted splice site  
 Splice\_304 223535 223536 1.797 Predicted splice site  
 Splice\_305 223835 223836 1.728 Predicted splice site  
 Splice\_306 223979 223980 2.187 Predicted splice site  
 lmaj\_01\_075 223996 226251 0 hypothetical protein,  
 conserved  
 Splice\_307 226949 226950 2.471 Predicted splice site  
 Splice\_308 227012 227013 1.668 Predicted splice site  
 lmaj\_01\_076 227137 231810 0 protein kinase, putative  
 Splice\_309 227213 227214 1.967 Predicted splice site  
 Splice\_310 227462 227463 2.720 Predicted splice site  
 Splice\_311 232203 232204 1.668 Predicted splice site  
 Splice\_312 232373 232374 2.304 Predicted splice site  
 lmaj\_01\_077 232416 233435 0 hypothetical protein,  
 unknown function  
 Splice\_313 232618 232619 1.783 Predicted splice site

Splice\_314 233987 233988 1.756 Predicted splice site  
 Splice\_315 234279 234280 2.497 Predicted splice site  
 Splice\_316 234366 234367 1.698 Predicted splice site  
 lmaj\_01\_078 234389 235600 0 eukaryotic initiation  
 factor 4a, putative  
 Splice\_317 235684 235685 1.945 Predicted splice site  
 Splice\_318 236093 236094 1.945 Predicted splice site  
 Splice\_319 236322 236323 1.501 Predicted splice site  
 Splice\_320 236555 236556 2.409 Predicted splice site  
 Splice\_321 236623 236624 1.588 Predicted splice site  
 Splice\_322 236704 236705 1.520 Predicted splice site  
 Splice\_323 237276 237277 2.553 Predicted splice site  
 Splice\_324 237363 237364 1.698 Predicted splice site  
 lmaj\_01\_079 237386 238597 0 eukaryotic initiation  
 factor 4a, putative  
 Splice\_325 238681 238682 1.945 Predicted splice site  
 Splice\_326 239252 239253 1.874 Predicted splice site  
 Splice\_327 239448 239449 2.553 Predicted splice site  
 Splice\_328 239817 239818 2.178 Predicted splice site  
 Splice\_329 240488 240489 2.221 Predicted splice site  
 lmaj\_01\_080 240764 242350 0 hypothetical protein,  
 conserved  
 Splice\_330 242537 242538 2.497 Predicted splice site  
 Splice\_331 243077 243078 2.715 Predicted splice site  
 Splice\_332 243244 243245 1.653 Predicted splice site  
 Splice\_333 243661 243662 2.296 Predicted splice site  
 Splice\_334 244498 244499 2.358 Predicted splice site  
 lmaj\_01\_081 244528 246057 0 hypothetical protein,  
 conserved  
 Splice\_335 244645 244646 2.372 Predicted splice site  
 Splice\_336 246882 246883 3.051 Predicted splice site  
 Splice\_337 247078 247079 2.694 Predicted splice site  
 Splice\_338 247345 247346 1.922 Predicted splice site  
 lmaj\_01\_082 247548 250601 0 calcium/potassium channel  
 (CAKC), putative  
 Splice\_339 248052 248053 1.621 Predicted splice site  
 Splice\_340 248167 248168 1.621 Predicted splice site  
 Splice\_341 248341 248342 1.653 Predicted splice site  
 Splice\_342 251556 251557 1.668 Predicted splice site  
 Splice\_343 251614 251615 1.588 Predicted splice site  
 Splice\_344 252112 252113 2.775 Predicted splice site  
 Splice\_345 252369 252370 2.700 Predicted splice site  
 lmaj\_01\_083 252409 255888 0 potassium channel  
 subunit-like protein  
 Splice\_346 253904 253905 1.797 Predicted splice site

|             |        |        |       |                                   |
|-------------|--------|--------|-------|-----------------------------------|
| Splice_347  | 255872 | 255873 | 1.885 | Predicted splice site             |
| Splice_348  | 256006 | 256007 | 2.064 | Predicted splice site             |
| Splice_349  | 256759 | 256760 | 2.178 | Predicted splice site             |
| Splice_350  | 256945 | 256946 | 1.728 | Predicted splice site             |
| Splice_351  | 257396 | 257397 | 2.001 | Predicted splice site             |
| Splice_352  | 258107 | 258108 | 1.537 | Predicted splice site             |
| Splice_353  | 258588 | 258589 | 1.756 | Predicted splice site             |
| Splice_354  | 258813 | 258814 | 1.621 | Predicted splice site             |
| lmaj_01_084 | 258829 | 260865 | 0     | peptidyl dipeptidase,<br>putative |
| Splice_355  | 260074 | 260075 | 1.653 | Predicted splice site             |
| Splice_356  | 261454 | 261455 | 2.247 | Predicted splice site             |
| Splice_357  | 262609 | 262610 | 1.910 | Predicted splice site             |
| Splice_358  | 262677 | 262678 | 1.572 | Predicted splice site             |
| Splice_359  | 263259 | 263260 | 1.809 | Predicted splice site             |
| Splice_360  | 263921 | 263922 | 1.554 | Predicted splice site             |
| Splice_361  | 264454 | 264455 | 1.605 | Predicted splice site             |
| Splice_362  | 264848 | 264849 | 2.132 | Predicted splice site             |
| Splice_363  | 264911 | 264912 | 1.668 | Predicted splice site             |
| Splice_364  | 265093 | 265094 | 1.698 | Predicted splice site             |
| Splice_365  | 265329 | 265330 | 1.520 | Predicted splice site             |
| Splice_366  | 265474 | 265475 | 1.874 | Predicted splice site             |
| Splice_367  | 267270 | 267271 | 2.694 | Predicted splice site             |
| Splice_368  | 267647 | 267648 | 2.429 | Predicted splice site             |
| Splice_369  | 267803 | 267804 | 1.520 | Predicted splice site             |
| Splice_370  | 268000 | 268001 | 1.713 | Predicted splice site             |
| Splice_371  | 268229 | 268230 | 1.783 | Predicted splice site             |
| Splice_372  | 268316 | 268317 | 1.849 | Predicted splice site             |
| Splice_373  | 268443 | 268444 | 1.967 | Predicted splice site             |
| Splice_374  | 268562 | 268563 | 1.621 | Predicted splice site             |
| Splice_375  | 268725 | 268726 | 2.583 | Predicted splice site             |

## Predictions for the Reverse Strand of Chromosome 1

|           |       |       |       |                       |
|-----------|-------|-------|-------|-----------------------|
| Splice_1  | 1113  | 1114  | 1.783 | Predicted splice site |
| Splice_2  | 2043  | 2044  | 1.653 | Predicted splice site |
| Splice_3  | 2492  | 2493  | 1.769 | Predicted splice site |
| Splice_4  | 5063  | 5064  | 1.537 | Predicted splice site |
| Splice_5  | 5291  | 5292  | 2.343 | Predicted splice site |
| Splice_6  | 10065 | 10066 | 1.572 | Predicted splice site |
| Splice_7  | 10400 | 10401 | 2.214 | Predicted splice site |
| Splice_8  | 10631 | 10632 | 2.312 | Predicted splice site |
| Splice_9  | 11517 | 11518 | 1.554 | Predicted splice site |
| Splice_10 | 12184 | 12185 | 1.742 | Predicted splice site |
| Splice_11 | 12733 | 12734 | 1.668 | Predicted splice site |
| Splice_12 | 17301 | 17302 | 1.501 | Predicted splice site |
| Splice_13 | 23726 | 23727 | 1.537 | Predicted splice site |
| Splice_14 | 25024 | 25025 | 1.823 | Predicted splice site |
| Splice_15 | 25567 | 25568 | 1.756 | Predicted splice site |
| Splice_16 | 26467 | 26468 | 1.910 | Predicted splice site |
| Splice_17 | 26619 | 26620 | 1.605 | Predicted splice site |
| Splice_18 | 28701 | 28702 | 2.187 | Predicted splice site |
| Splice_19 | 29116 | 29117 | 2.366 | Predicted splice site |
| Splice_20 | 29176 | 29177 | 1.621 | Predicted splice site |
| Splice_21 | 29457 | 29458 | 1.885 | Predicted splice site |
| Splice_22 | 29914 | 29915 | 1.885 | Predicted splice site |
| Splice_23 | 29990 | 29991 | 1.849 | Predicted splice site |
| Splice_24 | 30061 | 30062 | 1.783 | Predicted splice site |
| Splice_25 | 30166 | 30167 | 2.141 | Predicted splice site |
| Splice_26 | 32082 | 32083 | 2.033 | Predicted splice site |
| Splice_27 | 32682 | 32683 | 2.132 | Predicted splice site |
| Splice_28 | 32831 | 32832 | 2.497 | Predicted splice site |
| Splice_29 | 34998 | 34999 | 1.501 | Predicted splice site |
| Splice_30 | 36925 | 36926 | 1.683 | Predicted splice site |
| Splice_31 | 37273 | 37274 | 1.823 | Predicted splice site |
| Splice_32 | 39844 | 39845 | 1.537 | Predicted splice site |
| Splice_33 | 39985 | 39986 | 1.588 | Predicted splice site |
| Splice_34 | 42769 | 42770 | 1.783 | Predicted splice site |
| Splice_35 | 43615 | 43616 | 2.813 | Predicted splice site |
| Splice_36 | 45030 | 45031 | 1.572 | Predicted splice site |
| Splice_37 | 45654 | 45655 | 1.874 | Predicted splice site |
| Splice_38 | 45817 | 45818 | 1.501 | Predicted splice site |
| Splice_39 | 46978 | 46979 | 1.637 | Predicted splice site |
| Splice_40 | 52858 | 52859 | 1.537 | Predicted splice site |
| Splice_41 | 54289 | 54290 | 1.572 | Predicted splice site |
| Splice_42 | 55888 | 55889 | 1.849 | Predicted splice site |
| Splice_43 | 59033 | 59034 | 1.756 | Predicted splice site |

|           |        |        |       |           |             |
|-----------|--------|--------|-------|-----------|-------------|
| Splice_44 | 59092  | 59093  | 1.572 | Predicted | splice site |
| Splice_45 | 61587  | 61588  | 1.783 | Predicted | splice site |
| Splice_46 | 62917  | 62918  | 1.554 | Predicted | splice site |
| Splice_47 | 63726  | 63727  | 1.713 | Predicted | splice site |
| Splice_48 | 64512  | 64513  | 1.769 | Predicted | splice site |
| Splice_49 | 66144  | 66145  | 1.756 | Predicted | splice site |
| Splice_50 | 66225  | 66226  | 1.910 | Predicted | splice site |
| Splice_51 | 68301  | 68302  | 1.922 | Predicted | splice site |
| Splice_52 | 68597  | 68598  | 1.783 | Predicted | splice site |
| Splice_53 | 70179  | 70180  | 1.520 | Predicted | splice site |
| Splice_54 | 73844  | 73845  | 2.141 | Predicted | splice site |
| Splice_55 | 75703  | 75704  | 1.698 | Predicted | splice site |
| Splice_56 | 75874  | 75875  | 2.122 | Predicted | splice site |
| Splice_57 | 76238  | 76239  | 2.043 | Predicted | splice site |
| Splice_58 | 79835  | 79836  | 1.713 | Predicted | splice site |
| Splice_59 | 80073  | 80074  | 2.064 | Predicted | splice site |
| Splice_60 | 80722  | 80723  | 1.910 | Predicted | splice site |
| Splice_61 | 81721  | 81722  | 2.053 | Predicted | splice site |
| Splice_62 | 83763  | 83764  | 2.022 | Predicted | splice site |
| Splice_63 | 84103  | 84104  | 1.713 | Predicted | splice site |
| Splice_64 | 84192  | 84193  | 1.520 | Predicted | splice site |
| Splice_65 | 84893  | 84894  | 2.053 | Predicted | splice site |
| Splice_66 | 86717  | 86718  | 1.849 | Predicted | splice site |
| Splice_67 | 88266  | 88267  | 1.874 | Predicted | splice site |
| Splice_68 | 88610  | 88611  | 1.713 | Predicted | splice site |
| Splice_69 | 89399  | 89400  | 1.605 | Predicted | splice site |
| Splice_70 | 91758  | 91759  | 1.520 | Predicted | splice site |
| Splice_71 | 92318  | 92319  | 2.093 | Predicted | splice site |
| Splice_72 | 92666  | 92667  | 1.572 | Predicted | splice site |
| Splice_73 | 93461  | 93462  | 1.621 | Predicted | splice site |
| Splice_74 | 93903  | 93904  | 1.713 | Predicted | splice site |
| Splice_75 | 98422  | 98423  | 1.668 | Predicted | splice site |
| Splice_76 | 102757 | 102758 | 1.797 | Predicted | splice site |
| Splice_77 | 102902 | 102903 | 1.698 | Predicted | splice site |
| Splice_78 | 104112 | 104113 | 1.809 | Predicted | splice site |
| Splice_79 | 104387 | 104388 | 1.668 | Predicted | splice site |
| Splice_80 | 104463 | 104464 | 1.572 | Predicted | splice site |
| Splice_81 | 106671 | 106672 | 1.861 | Predicted | splice site |
| Splice_82 | 107152 | 107153 | 1.537 | Predicted | splice site |
| Splice_83 | 107220 | 107221 | 1.742 | Predicted | splice site |
| Splice_84 | 110562 | 110563 | 2.320 | Predicted | splice site |
| Splice_85 | 112150 | 112151 | 1.835 | Predicted | splice site |
| Splice_86 | 113004 | 113005 | 2.103 | Predicted | splice site |
| Splice_87 | 114430 | 114431 | 1.554 | Predicted | splice site |
| Splice_88 | 114615 | 114616 | 2.043 | Predicted | splice site |

|            |        |        |       |                       |
|------------|--------|--------|-------|-----------------------|
| Splice_89  | 117565 | 117566 | 1.554 | Predicted splice site |
| Splice_90  | 121919 | 121920 | 1.885 | Predicted splice site |
| Splice_91  | 122864 | 122865 | 2.280 | Predicted splice site |
| Splice_92  | 126444 | 126445 | 2.437 | Predicted splice site |
| Splice_93  | 127500 | 127501 | 1.588 | Predicted splice site |
| Splice_94  | 127964 | 127965 | 2.541 | Predicted splice site |
| Splice_95  | 128760 | 128761 | 1.572 | Predicted splice site |
| Splice_96  | 131992 | 131993 | 1.537 | Predicted splice site |
| Splice_97  | 132193 | 132194 | 1.698 | Predicted splice site |
| Splice_98  | 133502 | 133503 | 2.256 | Predicted splice site |
| Splice_99  | 133684 | 133685 | 2.033 | Predicted splice site |
| Splice_100 | 133757 | 133758 | 1.809 | Predicted splice site |
| Splice_101 | 134545 | 134546 | 1.520 | Predicted splice site |
| Splice_102 | 134900 | 134901 | 1.861 | Predicted splice site |
| Splice_103 | 135793 | 135794 | 1.967 | Predicted splice site |
| Splice_104 | 141273 | 141274 | 1.537 | Predicted splice site |
| Splice_105 | 141587 | 141588 | 1.934 | Predicted splice site |
| Splice_106 | 141709 | 141710 | 1.501 | Predicted splice site |
| Splice_107 | 142507 | 142508 | 1.967 | Predicted splice site |
| Splice_108 | 143822 | 143823 | 1.520 | Predicted splice site |
| Splice_109 | 145132 | 145133 | 1.769 | Predicted splice site |
| Splice_110 | 145423 | 145424 | 1.797 | Predicted splice site |
| Splice_111 | 146496 | 146497 | 1.605 | Predicted splice site |
| Splice_112 | 146999 | 147000 | 2.187 | Predicted splice site |
| Splice_113 | 148124 | 148125 | 2.001 | Predicted splice site |
| Splice_114 | 148736 | 148737 | 1.849 | Predicted splice site |
| Splice_115 | 149312 | 149313 | 1.728 | Predicted splice site |
| Splice_116 | 149677 | 149678 | 1.621 | Predicted splice site |
| Splice_117 | 149875 | 149876 | 1.588 | Predicted splice site |
| Splice_118 | 150304 | 150305 | 1.910 | Predicted splice site |
| Splice_119 | 150888 | 150889 | 1.520 | Predicted splice site |
| Splice_120 | 153760 | 153761 | 2.103 | Predicted splice site |
| Splice_121 | 154521 | 154522 | 2.012 | Predicted splice site |
| Splice_122 | 155460 | 155461 | 2.358 | Predicted splice site |
| Splice_123 | 155730 | 155731 | 1.537 | Predicted splice site |
| Splice_124 | 156216 | 156217 | 2.288 | Predicted splice site |
| Splice_125 | 158014 | 158015 | 2.150 | Predicted splice site |
| Splice_126 | 158168 | 158169 | 1.713 | Predicted splice site |
| Splice_127 | 158226 | 158227 | 1.588 | Predicted splice site |
| Splice_128 | 158740 | 158741 | 1.849 | Predicted splice site |
| Splice_129 | 159372 | 159373 | 2.093 | Predicted splice site |
| Splice_130 | 159762 | 159763 | 2.150 | Predicted splice site |
| Splice_131 | 159897 | 159898 | 1.520 | Predicted splice site |
| Splice_132 | 160750 | 160751 | 1.605 | Predicted splice site |
| Splice_133 | 162725 | 162726 | 1.698 | Predicted splice site |

|             |        |        |       |                 |                                 |
|-------------|--------|--------|-------|-----------------|---------------------------------|
| Splice_134  | 163046 | 163047 | 1.922 | Predicted       | splice site                     |
| Splice_135  | 164706 | 164707 | 1.605 | Predicted       | splice site                     |
| Splice_136  | 165482 | 165483 | 1.683 | Predicted       | splice site                     |
| Splice_137  | 165671 | 165672 | 1.501 | Predicted       | splice site                     |
| Splice_138  | 167118 | 167119 | 1.979 | Predicted       | splice site                     |
| Splice_139  | 167315 | 167316 | 2.033 | Predicted       | splice site                     |
| Splice_140  | 167488 | 167489 | 2.141 | Predicted       | splice site                     |
| Splice_141  | 167878 | 167879 | 2.053 | Predicted       | splice site                     |
| Splice_142  | 170987 | 170988 | 1.637 | Predicted       | splice site                     |
| Splice_143  | 172543 | 172544 | 1.554 | Predicted       | splice site                     |
| Splice_144  | 172660 | 172661 | 1.605 | Predicted       | splice site                     |
| Splice_145  | 174637 | 174638 | 1.823 | Predicted       | splice site                     |
| Splice_146  | 174790 | 174791 | 1.922 | Predicted       | splice site                     |
| Splice_147  | 174916 | 174917 | 1.698 | Predicted       | splice site                     |
| Splice_148  | 178063 | 178064 | 2.150 | Predicted       | splice site                     |
| Splice_149  | 178429 | 178430 | 1.698 | Predicted       | splice site                     |
| Splice_150  | 179162 | 179163 | 1.898 | Predicted       | splice site                     |
| Splice_151  | 179448 | 179449 | 1.783 | Predicted       | splice site                     |
| Splice_152  | 179509 | 179510 | 1.637 | Predicted       | splice site                     |
| Splice_153  | 179697 | 179698 | 1.501 | Predicted       | splice site                     |
| Splice_154  | 179803 | 179804 | 1.713 | Predicted       | splice site                     |
| Splice_155  | 180429 | 180430 | 2.043 | Predicted       | splice site                     |
| Splice_156  | 180499 | 180500 | 1.769 | Predicted       | splice site                     |
| Splice_157  | 183403 | 183404 | 2.033 | Predicted       | splice site                     |
| Splice_158  | 183758 | 183759 | 1.683 | Predicted       | splice site                     |
| Splice_159  | 184252 | 184253 | 1.835 | Predicted       | splice site                     |
| Splice_160  | 184390 | 184391 | 1.989 | Predicted       | splice site                     |
| Splice_161  | 184493 | 184494 | 1.537 | Predicted       | splice site                     |
| Splice_162  | 187295 | 187296 | 2.043 | Predicted       | splice site                     |
| Splice_163  | 187640 | 187641 | 1.683 | Predicted       | splice site                     |
| Splice_164  | 187952 | 187953 | 1.588 | Predicted       | splice site                     |
| Splice_165  | 188061 | 188062 | 1.835 | Predicted       | splice site                     |
| Splice_166  | 188145 | 188146 | 1.823 | Predicted       | splice site                     |
| Splice_167  | 188415 | 188416 | 1.797 | Predicted       | splice site                     |
| Splice_168  | 190046 | 190047 | 1.683 | Predicted       | splice site                     |
| Splice_169  | 190167 | 190168 | 1.520 | Predicted       | splice site                     |
| Splice_170  | 190338 | 190339 | 1.742 | Predicted       | splice site                     |
| Splice_171  | 190760 | 190761 | 1.945 | Predicted       | splice site                     |
| lmaj_01_031 | 191601 | 192767 | 0     | acidocalcisomal | exopolyphosphatase,<br>putative |
| Splice_172  | 191953 | 191954 | 1.713 | Predicted       | splice site                     |
| Splice_173  | 193241 | 193242 | 1.922 | Predicted       | splice site                     |
| Splice_174  | 193325 | 193326 | 1.501 | Predicted       | splice site                     |
| lmaj_01_030 | 193331 | 193510 | 0     | hypothetical    | protein,<br>conserved           |



lmaj\_01\_029 194432 194950 0 hypothetical protein,  
conserved

Splice\_175 195263 195264 1.637 Predicted splice site  
Splice\_176 195367 195368 2.150 Predicted splice site  
Splice\_177 195922 195923 1.637 Predicted splice site  
Splice\_178 196136 196137 1.621 Predicted splice site

lmaj\_01\_028 196197 197438 0 pseudouridylate synthase-like  
protein

Splice\_179 196228 196229 1.520 Predicted splice site  
Splice\_180 198343 198344 2.214 Predicted splice site  
Splice\_181 198506 198507 2.304 Predicted splice site  
Splice\_182 198903 198904 1.572 Predicted splice site

lmaj\_01\_027 199077 199400 0 thioredoxin,  
putative

Splice\_183 199671 199672 1.861 Predicted splice site  
Splice\_184 200088 200089 2.230 Predicted splice site  
Splice\_185 200210 200211 1.572 Predicted splice site  
Splice\_186 200266 200267 1.554 Predicted splice site  
Splice\_187 200477 200478 2.577 Predicted splice site  
Splice\_188 200612 200613 1.742 Predicted splice site

lmaj\_01\_026 200696 201541 0 hypothetical protein,  
conserved

Splice\_189 201895 201896 1.967 Predicted splice site  
Splice\_190 202132 202133 2.033 Predicted splice site  
Splice\_191 202192 202193 1.537 Predicted splice site  
Splice\_192 202373 202374 1.756 Predicted splice site  
Splice\_193 202736 202737 2.601 Predicted splice site

lmaj\_01\_025 202999 205365 0 hypothetical protein,  
conserved

Splice\_194 204182 204183 1.756 Predicted splice site  
Splice\_195 204868 204869 1.637 Predicted splice site  
Splice\_196 206074 206075 2.914 Predicted splice site  
Splice\_197 206135 206136 1.588 Predicted splice site

lmaj\_01\_024 206151 208928 0 DNA excision/repair protein SNF2,  
putative

Splice\_198 207478 207479 1.501 Predicted splice site  
Splice\_199 209011 209012 1.898 Predicted splice site  
Splice\_200 209184 209185 2.640 Predicted splice site

lmaj\_01\_023 209731 210147 0 hypothetical protein,  
conserved

Splice\_201 210185 210186 1.572 Predicted splice site  
Splice\_202 210507 210508 1.783 Predicted splice site  
Splice\_203 210808 210809 2.429 Predicted splice site

lmaj\_01\_022 210951 211958 0 cyclophilin type  
peptidyl-prolyl cis-trans

Splice\_204 212425 212426 2.327 Predicted splice site  
 Splice\_205 212564 212565 2.053 Predicted splice site  
 Splice\_206 212814 212815 1.588 Predicted splice site  
 Splice\_207 213074 213075 1.874 Predicted splice site  
 Splice\_208 213209 213210 2.343 Predicted splice site  
 Splice\_209 215223 215224 1.756 Predicted splice site  
 Splice\_210 215379 215380 2.280 Predicted splice site  
 lmaj\_01\_021 215614 218307 0 hypothetical protein,  
 conserved  
 Splice\_211 218657 218658 1.537 Predicted splice site  
 Splice\_212 218717 218718 1.621 Predicted splice site  
 Splice\_213 218948 218949 1.910 Predicted splice site  
 Splice\_214 219078 219079 2.350 Predicted splice site  
 lmaj\_01\_020 219232 220134 0 hypothetical protein,  
 conserved  
 Splice\_215 219283 219284 2.343 Predicted splice site  
 Splice\_216 220282 220283 2.280 Predicted splice site  
 Splice\_217 220469 220470 1.783 Predicted splice site  
 Splice\_218 220715 220716 1.742 Predicted splice site  
 lmaj\_01\_019 220847 221437 0 hypothetical protein,  
 conserved  
 Splice\_219 221747 221748 1.783 Predicted splice site  
 Splice\_220 221839 221840 2.033 Predicted splice site  
 Splice\_221 222105 222106 2.195 Predicted splice site  
 Splice\_222 222256 222257 1.653 Predicted splice site  
 Splice\_223 222428 222429 1.728 Predicted splice site  
 lmaj\_01\_018 222520 224838 0 CLC-type chloride channel,  
 putative  
 Splice\_224 222545 222546 1.713 Predicted splice site  
 Splice\_225 224986 224987 1.979 Predicted splice site  
 Splice\_226 225189 225190 2.710 Predicted splice site  
 Splice\_227 225386 225387 2.230 Predicted splice site  
 Splice\_228 225512 225513 2.335 Predicted splice site  
 Splice\_229 226005 226006 1.898 Predicted splice site  
 Splice\_230 226172 226173 1.572 Predicted splice site  
 lmaj\_01\_017 226337 227713 0 hypothetical protein,  
 unknown function  
 Splice\_231 227484 227485 1.835 Predicted splice site  
 Splice\_232 228422 228423 1.621 Predicted splice site  
 Splice\_233 229545 229546 1.637 Predicted splice site  
 Splice\_234 229728 229729 2.296 Predicted splice site  
 lmaj\_01\_016 229803 230045 0 hypothetical protein,  
 unknown function  
 Splice\_235 229819 229820 1.835 Predicted splice site  
 Splice\_236 230361 230362 2.571 Predicted splice site

Splice\_237 230592 230593 2.141 Predicted splice site  
 Splice\_238 230736 230737 2.429 Predicted splice site  
 lmaj\_01\_015 230921 231271 0 hypothetical protein,  
 conserved  
 Splice\_239 231327 231328 1.572 Predicted splice site  
 Splice\_240 231577 231578 2.221 Predicted splice site  
 lmaj\_01\_014 231691 232107 0 hypothetical protein,  
 conserved  
 Splice\_241 232390 232391 2.387 Predicted splice site  
 Splice\_242 232478 232479 1.989 Predicted splice site  
 Splice\_243 232728 232729 2.914 Predicted splice site  
 Splice\_244 232838 232839 2.204 Predicted splice site  
 Splice\_245 233791 233792 1.572 Predicted splice site  
 Splice\_246 234041 234042 1.934 Predicted splice site  
 lmaj\_01\_013 234261 235355 0 hypothetical protein,  
 conserved  
 Splice\_247 235630 235631 2.471 Predicted splice site  
 Splice\_248 236068 236069 1.797 Predicted splice site  
 Splice\_249 236360 236361 2.652 Predicted splice site  
 Splice\_250 236525 236526 1.554 Predicted splice site  
 Splice\_251 236768 236769 2.947 Predicted splice site  
 lmaj\_01\_012 237409 238707 0 hypothetical protein,  
 conserved  
 Splice\_252 238997 238998 1.554 Predicted splice site  
 Splice\_253 239116 239117 1.668 Predicted splice site  
 Splice\_254 239209 239210 1.797 Predicted splice site  
 Splice\_255 239609 239610 2.132 Predicted splice site  
 Splice\_256 239866 239867 2.001 Predicted splice site  
 lmaj\_01\_011 239877 240464 0 glutaredoxin-like protein  
 Splice\_257 241194 241195 2.064 Predicted splice site  
 lmaj\_01\_010 241624 242580 0 hypothetical protein,  
 conserved  
 Splice\_258 242778 242779 1.653 Predicted splice site  
 Splice\_259 242984 242985 1.621 Predicted splice site  
 Splice\_260 243248 243249 1.653 Predicted splice site  
 lmaj\_01\_009 243302 244126 0 hypothetical protein,  
 conserved  
 Splice\_261 244360 244361 1.637 Predicted splice site  
 Splice\_262 244464 244465 2.150 Predicted splice site  
 Splice\_263 245001 245002 1.501 Predicted splice site  
 Splice\_264 245517 245518 2.160 Predicted splice site  
 lmaj\_01\_008 245659 246372 0 hypothetical protein,  
 conserved  
 Splice\_265 245706 245707 2.490 Predicted splice site  
 Splice\_266 246461 246462 1.874 Predicted splice site

Splice\_267 246881 246882 2.093 Predicted splice site  
 Splice\_268 246979 246980 1.979 Predicted splice site  
 lmaj\_01\_007 247238 249034 0 hypothetical protein,  
 conserved  
 Splice\_269 247251 247252 2.122 Predicted splice site  
 Splice\_270 247908 247909 1.835 Predicted splice site  
 Splice\_271 248500 248501 1.769 Predicted splice site  
 Splice\_272 249230 249231 1.885 Predicted splice site  
 Splice\_273 249322 249323 2.033 Predicted splice site  
 Splice\_274 249481 249482 1.957 Predicted splice site  
 Splice\_275 249544 249545 1.668 Predicted splice site  
 Splice\_276 249703 249704 1.713 Predicted splice site  
 Splice\_277 249894 249895 2.735 Predicted splice site  
 Splice\_278 250057 250058 1.520 Predicted splice site  
 lmaj\_01\_006 250099 250848 0 hypothetical protein,  
 conserved  
 Splice\_279 251189 251190 2.204 Predicted splice site  
 Splice\_280 251598 251599 2.380 Predicted splice site  
 Splice\_281 251783 251784 2.288 Predicted splice site  
 Splice\_282 251942 251943 2.471 Predicted splice site  
 lmaj\_01\_005 251963 253960 0 carboxylase,  
 putative  
 Splice\_283 254148 254149 2.239 Predicted splice site  
 Splice\_284 254464 254465 2.720 Predicted splice site  
 Splice\_285 254544 254545 1.898 Predicted splice site  
 Splice\_286 254609 254610 1.653 Predicted splice site  
 Splice\_287 254686 254687 1.861 Predicted splice site  
 Splice\_288 254766 254767 1.898 Predicted splice site  
 Splice\_289 255356 255357 3.220 Predicted splice site  
 Splice\_290 255466 255467 1.823 Predicted splice site  
 Splice\_291 255550 255551 1.728 Predicted splice site  
 Splice\_292 256017 256018 2.150 Predicted splice site  
 Splice\_293 256110 256111 1.572 Predicted splice site  
 Splice\_294 256238 256239 2.350 Predicted splice site  
 Splice\_295 256339 256340 2.122 Predicted splice site  
 lmaj\_01\_004 256342 256911 0 hypothetical protein,  
 unknown function  
 Splice\_296 257327 257328 2.662 Predicted splice site  
 Splice\_297 257539 257540 1.742 Predicted splice site  
 Splice\_298 257680 257681 1.910 Predicted splice site  
 Splice\_299 257773 257774 1.520 Predicted splice site  
 lmaj\_01\_003 257917 259923 0 MCAK-like kinesin,  
 putative  
 Splice\_300 259431 259432 1.653 Predicted splice site  
 Splice\_301 260061 260062 2.272 Predicted splice site

|             |        |        |       |                       |                  |
|-------------|--------|--------|-------|-----------------------|------------------|
| Splice_302  | 260329 | 260330 | 2.409 | Predicted             | splice site      |
| Splice_303  | 260547 | 260548 | 2.547 | Predicted             | splice site      |
| Splice_304  | 260758 | 260759 | 1.653 | Predicted             | splice site      |
| Splice_305  | 260875 | 260876 | 2.264 | Predicted             | splice site      |
| Splice_306  | 260953 | 260954 | 1.874 | Predicted             | splice site      |
| Splice_307  | 261223 | 261224 | 1.769 | Predicted             | splice site      |
| Splice_308  | 261351 | 261352 | 2.350 | Predicted             | splice site      |
| Splice_309  | 261411 | 261412 | 1.621 | Predicted             | splice site      |
| lmaj_01_002 | 261545 | 263194 | 0     | hypothetical protein, | conserved        |
| Splice_310  | 263188 | 263189 | 1.922 | Predicted             | splice site      |
| Splice_311  | 263267 | 263268 | 1.572 | Predicted             | splice site      |
| Splice_312  | 263879 | 263880 | 1.728 | Predicted             | splice site      |
| Splice_313  | 264033 | 264034 | 2.103 | Predicted             | splice site      |
| lmaj_01_001 | 264282 | 265280 | 0     | hypothetical protein, | unknown function |
| Splice_314  | 265074 | 265075 | 1.898 | Predicted             | splice site      |
| Splice_315  | 265513 | 265514 | 2.679 | Predicted             | splice site      |
| Splice_316  | 265575 | 265576 | 1.572 | Predicted             | splice site      |
| Splice_317  | 265640 | 265641 | 1.698 | Predicted             | splice site      |
| Splice_318  | 265739 | 265740 | 2.103 | Predicted             | splice site      |
| Splice_319  | 265973 | 265974 | 2.559 | Predicted             | splice site      |
| Splice_320  | 266238 | 266239 | 2.652 | Predicted             | splice site      |
| Splice_321  | 266417 | 266418 | 1.698 | Predicted             | splice site      |
| Splice_322  | 266482 | 266483 | 1.621 | Predicted             | splice site      |
| Splice_323  | 266730 | 266731 | 2.751 | Predicted             | splice site      |
| Splice_324  | 266803 | 266804 | 1.501 | Predicted             | splice site      |
| Splice_325  | 267296 | 267297 | 2.001 | Predicted             | splice site      |
| Splice_326  | 267446 | 267447 | 1.885 | Predicted             | splice site      |
| Splice_327  | 267511 | 267512 | 1.698 | Predicted             | splice site      |
| Splice_328  | 268016 | 268017 | 2.541 | Predicted             | splice site      |
| Splice_329  | 268141 | 268142 | 1.554 | Predicted             | splice site      |
| Splice_330  | 268288 | 268289 | 2.073 | Predicted             | splice site      |
| Splice_331  | 268398 | 268399 | 2.132 | Predicted             | splice site      |

## Predictions for the Forward Strand of Chromosome 3

Splice\_1 5437 5438 1.683 Predicted splice site  
lmaj\_03\_002 5471 6277 0 hypothetical protein,  
unknown function  
lmaj\_03\_003 6699 8234 0 D-3-phosphoglycerate  
dehydrogenase-like protein  
Splice\_2 6832 6833 1.653 Predicted splice site  
Splice\_3 6925 6926 1.605 Predicted splice site  
Splice\_4 7017 7018 1.588 Predicted splice site  
Splice\_5 8539 8540 1.967 Predicted splice site  
lmaj\_03\_004 8999 10306 0 2-aminoethylphosphonate:pyruvate  
Splice\_6 9058 9059 1.934 Predicted splice site  
Splice\_7 9145 9146 1.979 Predicted splice site  
Splice\_8 9596 9597 1.756 Predicted splice site  
Splice\_9 10460 10461 1.934 Predicted splice site  
Splice\_10 10532 10533 1.797 Predicted splice site  
Splice\_11 10712 10713 2.012 Predicted splice site  
Splice\_12 11243 11244 1.742 Predicted splice site  
Splice\_13 11377 11378 2.395 Predicted splice site  
lmaj\_03\_005 11551 11754 0 hypothetical protein,  
unknown function  
Splice\_14 12042 12043 1.756 Predicted splice site  
Splice\_15 12508 12509 1.572 Predicted splice site  
Splice\_16 12721 12722 2.221 Predicted splice site  
Splice\_17 12899 12900 1.742 Predicted splice site  
Splice\_18 13075 13076 2.150 Predicted splice site  
Splice\_19 13333 13334 1.683 Predicted splice site  
Splice\_20 13466 13467 1.783 Predicted splice site  
lmaj\_03\_006 13513 14685 0 hypothetical protein,  
unknown function  
Splice\_21 15258 15259 2.103 Predicted splice site  
Splice\_22 15381 15382 2.312 Predicted splice site  
Splice\_23 15460 15461 1.588 Predicted splice site  
lmaj\_03\_007 15549 18050 0 hypothetical protein,  
unknown function  
Splice\_24 16324 16325 1.520 Predicted splice site  
Splice\_25 17002 17003 1.554 Predicted splice site  
Splice\_26 17500 17501 2.064 Predicted splice site  
Splice\_27 18179 18180 2.012 Predicted splice site  
Splice\_28 18395 18396 2.372 Predicted splice site  
lmaj\_03\_008 18824 20710 0 Transporter Protein,  
putative  
Splice\_29 20381 20382 1.823 Predicted splice site  
Splice\_30 20449 20450 1.742 Predicted splice site

Splice\_31 21142 21143 1.637 Predicted splice site  
 Splice\_32 21295 21296 2.264 Predicted splice site  
 Splice\_33 21555 21556 1.698 Predicted splice site  
 Splice\_34 21632 21633 1.554 Predicted splice site  
 Splice\_35 21695 21696 1.668 Predicted splice site  
 Splice\_36 21957 21958 2.264 Predicted splice site  
 lmaj\_03\_009 21972 23675 0 DNA primase large subunit  
 p58-like protein  
 Splice\_37 22852 22853 1.756 Predicted splice site  
 Splice\_38 23122 23123 1.572 Predicted splice site  
 Splice\_39 24074 24075 1.922 Predicted splice site  
 Splice\_40 24279 24280 1.588 Predicted splice site  
 Splice\_41 24576 24577 1.537 Predicted splice site  
 Splice\_42 24839 24840 2.132 Predicted splice site  
 lmaj\_03\_010 25140 25634 0 Cytochrome c oxidase  
 assembly protein, putative  
 Splice\_43 26028 26029 2.187 Predicted splice site  
 Splice\_44 26151 26152 2.103 Predicted splice site  
 Splice\_45 26416 26417 2.629 Predicted splice site  
 Splice\_46 26487 26488 1.537 Predicted splice site  
 lmaj\_03\_011 26692 29559 0 hypothetical protein,  
 unknown function  
 Splice\_47 26753 26754 1.554 Predicted splice site  
 Splice\_48 26834 26835 1.910 Predicted splice site  
 Splice\_49 27633 27634 1.554 Predicted splice site  
 Splice\_50 29994 29995 1.520 Predicted splice site  
 Splice\_51 30084 30085 1.957 Predicted splice site  
 lmaj\_03\_012 30321 33098 0 hypothetical protein,  
 unknown function  
 Splice\_52 30437 30438 1.668 Predicted splice site  
 Splice\_53 32864 32865 1.520 Predicted splice site  
 Splice\_54 33391 33392 1.728 Predicted splice site  
 Splice\_55 33992 33993 1.910 Predicted splice site  
 Splice\_56 34076 34077 1.653 Predicted splice site  
 lmaj\_03\_013 34115 34663 0 hypothetical protein,  
 unknown function  
 Splice\_57 35036 35037 1.922 Predicted splice site  
 Splice\_58 35459 35460 2.770 Predicted splice site  
 lmaj\_03\_014 35547 35966 0 hypothetical protein,  
 unknown function  
 Splice\_59 35569 35570 1.885 Predicted splice site  
 Splice\_60 36042 36043 1.698 Predicted splice site  
 Splice\_61 36148 36149 1.797 Predicted splice site  
 Splice\_62 36409 36410 1.910 Predicted splice site  
 Splice\_63 36495 36496 1.967 Predicted splice site

Splice\_64 36983 36984 1.756 Predicted splice site  
 Splice\_65 37114 37115 2.033 Predicted splice site  
 lmaj\_03\_015 37224 38159 0 hypothetical protein,  
 unknown function  
 Splice\_66 38573 38574 1.769 Predicted splice site  
 Splice\_67 38770 38771 1.967 Predicted splice site  
 Splice\_68 38973 38974 2.689 Predicted splice site  
 lmaj\_03\_016 39082 41256 0 ABC transporter protein,  
 putative  
 Splice\_69 40322 40323 1.520 Predicted splice site  
 Splice\_70 40376 40377 1.520 Predicted splice site  
 Splice\_71 41821 41822 1.537 Predicted splice site  
 Splice\_72 42028 42029 2.001 Predicted splice site  
 lmaj\_03\_017 42231 42809 0 hypothetical protein,  
 unknown function  
 Splice\_73 43013 43014 2.132 Predicted splice site  
 lmaj\_03\_018 43600 45291 0 hypothetical protein,  
 unknown function  
 Splice\_74 43871 43872 2.195 Predicted splice site  
 Splice\_75 45658 45659 1.922 Predicted splice site  
 Splice\_76 45924 45925 2.765 Predicted splice site  
 lmaj\_03\_019 46204 46836 0 U2AF23/25 spliceosome component,  
 putative  
 Splice\_77 46349 46350 1.797 Predicted splice site  
 Splice\_78 47588 47589 2.366 Predicted splice site  
 Splice\_79 47700 47701 1.520 Predicted splice site  
 Splice\_80 48151 48152 1.728 Predicted splice site  
 Splice\_81 48240 48241 1.537 Predicted splice site  
 Splice\_82 48379 48380 1.874 Predicted splice site  
 lmaj\_03\_020 48406 50088 0 delta-1-pyrroline-5-carboxylate  
 dehydrogenase,  
 Splice\_83 50560 50561 2.483 Predicted splice site  
 Splice\_84 50702 50703 2.312 Predicted splice site  
 Splice\_85 50837 50838 1.989 Predicted splice site  
 Splice\_86 51593 51594 2.296 Predicted splice site  
 Splice\_87 51749 51750 2.168 Predicted splice site  
 Splice\_88 51876 51877 1.835 Predicted splice site  
 lmaj\_03\_021 51987 53126 0 Protein kinase,  
 putative  
 Splice\_89 53656 53657 1.934 Predicted splice site  
 Splice\_90 53885 53886 1.683 Predicted splice site  
 lmaj\_03\_022 54144 55085 0 hypothetical protein,  
 unknown function  
 Splice\_91 55254 55255 1.683 Predicted splice site  
 Splice\_92 55621 55622 2.033 Predicted splice site



lmaj\_03\_023 56016 58130 0 Long Chain Fatty Acyl  
CoA Synthetase, putative

Splice\_93 57850 57851 1.874 Predicted splice site  
Splice\_94 58428 58429 1.783 Predicted splice site  
Splice\_95 58654 58655 1.849 Predicted splice site  
Splice\_96 58730 58731 1.849 Predicted splice site  
Splice\_97 58860 58861 2.122 Predicted splice site  
Splice\_98 59151 59152 2.012 Predicted splice site  
Splice\_99 59759 59760 1.728 Predicted splice site  
Splice\_100 59903 59904 2.160 Predicted splice site  
Splice\_101 59995 59996 1.934 Predicted splice site  
Splice\_102 60355 60356 2.673 Predicted splice site  
Splice\_103 60598 60599 2.221 Predicted splice site  
Splice\_104 60778 60779 2.247 Predicted splice site  
Splice\_105 60871 60872 2.043 Predicted splice site

lmaj\_03\_024 61005 61469 0 hypothetical protein,  
unknown function

Splice\_106 61597 61598 1.537 Predicted splice site  
Splice\_107 61678 61679 1.910 Predicted splice site  
Splice\_108 62043 62044 2.700 Predicted splice site

lmaj\_03\_025 62112 62363 0 ribosomal protein L38,  
putative

Splice\_109 62715 62716 1.501 Predicted splice site  
Splice\_110 63348 63349 1.989 Predicted splice site  
Splice\_111 63435 63436 1.783 Predicted splice site  
Splice\_112 63546 63547 2.214 Predicted splice site

lmaj\_03\_026 63660 64568 0 hypothetical protein,  
unknown function

Splice\_113 64403 64404 1.809 Predicted splice site  
Splice\_114 64851 64852 1.588 Predicted splice site  
Splice\_115 65324 65325 2.103 Predicted splice site

lmaj\_03\_027 66061 73125 0 hypothetical protein,  
unknown function

Splice\_116 73267 73268 1.653 Predicted splice site  
Splice\_117 73783 73784 2.239 Predicted splice site

lmaj\_03\_028 74031 76958 0 hypothetical protein,  
unknown function

Splice\_118 75437 75438 1.637 Predicted splice site  
Splice\_119 75735 75736 1.605 Predicted splice site  
Splice\_120 75883 75884 2.187 Predicted splice site  
Splice\_121 77255 77256 1.783 Predicted splice site  
Splice\_122 77336 77337 1.910 Predicted splice site  
Splice\_123 77451 77452 1.653 Predicted splice site

lmaj\_03\_029 77815 78075 0 hypothetical protein,  
unknown function

Splice\_124 78650 78651 1.605 Predicted splice site  
 Splice\_125 78799 78800 1.823 Predicted splice site  
 lmaj\_03\_030 78812 79147 0 hypothetical protein,  
 unknown function  
 Splice\_126 79491 79492 1.756 Predicted splice site  
 Splice\_127 79912 79913 2.450 Predicted splice site  
 Splice\_128 80109 80110 1.520 Predicted splice site  
 Splice\_129 80202 80203 1.861 Predicted splice site  
 Splice\_130 80293 80294 1.874 Predicted splice site  
 Splice\_131 80351 80352 1.537 Predicted splice site  
 Splice\_132 80432 80433 1.910 Predicted splice site  
 Splice\_133 80800 80801 1.554 Predicted splice site  
 Splice\_134 80933 80934 2.160 Predicted splice site  
 Splice\_135 81163 81164 2.350 Predicted splice site  
 Splice\_136 81325 81326 2.477 Predicted splice site  
 Splice\_137 81403 81404 1.874 Predicted splice site  
 Splice\_138 81554 81555 2.444 Predicted splice site  
 Splice\_139 81649 81650 2.064 Predicted splice site  
 Splice\_140 81728 81729 1.885 Predicted splice site  
 Splice\_141 81960 81961 2.612 Predicted splice site  
 Splice\_142 82233 82234 2.528 Predicted splice site  
 Splice\_143 82417 82418 2.700 Predicted splice site  
 Splice\_144 82633 82634 1.934 Predicted splice site  
 Splice\_145 82750 82751 2.264 Predicted splice site  
 lmaj\_03\_031 82959 89222 0 hypothetical protein,  
 unknown function  
 Splice\_146 83016 83017 2.876 Predicted splice site  
 Splice\_147 89450 89451 1.668 Predicted splice site  
 Splice\_148 89950 89951 2.141 Predicted splice site  
 Splice\_149 90146 90147 2.256 Predicted splice site  
 lmaj\_03\_032 90199 93297 0 hypothetical protein,  
 unknown function  
 Splice\_150 93490 93491 1.967 Predicted splice site  
 Splice\_151 93604 93605 1.572 Predicted splice site  
 Splice\_152 94173 94174 1.809 Predicted splice site  
 Splice\_153 94232 94233 1.605 Predicted splice site  
 lmaj\_03\_033 94562 96454 0 hypothetical protein,  
 unknown function  
 Splice\_154 96682 96683 1.945 Predicted splice site  
 Splice\_155 96863 96864 1.849 Predicted splice site  
 lmaj\_03\_034 97234 98367 0 hypothetical protein,  
 unknown function  
 Splice\_156 97270 97271 2.589 Predicted splice site  
 Splice\_157 98679 98680 1.668 Predicted splice site  
 Splice\_158 98770 98771 2.022 Predicted splice site

Splice\_159 99198 99199 2.565 Predicted splice site  
 Splice\_160 99251 99252 1.501 Predicted splice site  
 Splice\_161 99393 99394 2.450 Predicted splice site  
 Splice\_162 99529 99530 1.945 Predicted splice site  
 lmaj\_03\_035 99584 104167 0 hypothetical protein,  
 unknown function  
 Splice\_163 101633 101634 1.572 Predicted splice site  
 Splice\_164 102367 102368 1.698 Predicted splice site  
 Splice\_165 104539 104540 1.979 Predicted splice site  
 Splice\_166 104783 104784 1.957 Predicted splice site  
 Splice\_167 104868 104869 1.683 Predicted splice site  
 Splice\_168 105389 105390 1.520 Predicted splice site  
 Splice\_169 105492 105493 1.668 Predicted splice site  
 Splice\_170 105581 105582 1.957 Predicted splice site  
 Splice\_171 106529 106530 2.064 Predicted splice site  
 Splice\_172 106647 106648 2.012 Predicted splice site  
 Splice\_173 106873 106874 2.705 Predicted splice site  
 Splice\_174 107193 107194 3.190 Predicted splice site  
 Splice\_175 107366 107367 2.084 Predicted splice site  
 Splice\_176 107448 107449 1.922 Predicted splice site  
 Splice\_177 107551 107552 1.898 Predicted splice site  
 Splice\_178 107720 107721 2.150 Predicted splice site  
 Splice\_179 107821 107822 1.989 Predicted splice site  
 lmaj\_03\_036 108060 113042 0 hypothetical protein,  
 unknown function  
 Splice\_180 109092 109093 1.537 Predicted splice site  
 Splice\_181 109200 109201 1.698 Predicted splice site  
 Splice\_182 110027 110028 1.713 Predicted splice site  
 Splice\_183 110131 110132 2.012 Predicted splice site  
 Splice\_184 110327 110328 2.256 Predicted splice site  
 Splice\_185 110541 110542 2.113 Predicted splice site  
 Splice\_186 111717 111718 1.797 Predicted splice site  
 Splice\_187 113260 113261 1.874 Predicted splice site  
 Splice\_188 113376 113377 1.742 Predicted splice site  
 Splice\_189 113433 113434 1.572 Predicted splice site  
 Splice\_190 113558 113559 1.605 Predicted splice site  
 Splice\_191 113958 113959 2.401 Predicted splice site  
 Splice\_192 114160 114161 2.726 Predicted splice site  
 Splice\_193 114339 114340 2.113 Predicted splice site  
 Splice\_194 114620 114621 3.087 Predicted splice site  
 Splice\_195 114760 114761 2.437 Predicted splice site  
 Splice\_196 114828 114829 1.742 Predicted splice site  
 Splice\_197 115011 115012 1.957 Predicted splice site  
 Splice\_198 115204 115205 2.256 Predicted splice site  
 Splice\_199 115346 115347 1.605 Predicted splice site

|             |        |        |       |           |                                  |
|-------------|--------|--------|-------|-----------|----------------------------------|
| Splice_200  | 115501 | 115502 | 1.637 | Predicted | splice site                      |
| Splice_201  | 115619 | 115620 | 1.713 | Predicted | splice site                      |
| Splice_202  | 115945 | 115946 | 2.012 | Predicted | splice site                      |
| Splice_203  | 116021 | 116022 | 1.849 | Predicted | splice site                      |
| Splice_204  | 116297 | 116298 | 2.296 | Predicted | splice site                      |
| Splice_205  | 116417 | 116418 | 1.501 | Predicted | splice site                      |
| Splice_206  | 116553 | 116554 | 2.387 | Predicted | splice site                      |
| lmaj_03_037 | 116651 | 117583 | 0     | conserved | hypothetical protein,<br>unknown |
| Splice_207  | 117326 | 117327 | 1.520 | Predicted | splice site                      |
| Splice_208  | 117408 | 117409 | 1.922 | Predicted | splice site                      |
| Splice_209  | 117968 | 117969 | 2.423 | Predicted | splice site                      |
| Splice_210  | 118326 | 118327 | 2.327 | Predicted | splice site                      |
| Splice_211  | 118467 | 118468 | 2.113 | Predicted | splice site                      |
| Splice_212  | 118800 | 118801 | 2.132 | Predicted | splice site                      |
| Splice_213  | 119000 | 119001 | 1.835 | Predicted | splice site                      |
| Splice_214  | 119113 | 119114 | 1.572 | Predicted | splice site                      |
| Splice_215  | 119415 | 119416 | 2.679 | Predicted | splice site                      |
| Splice_216  | 119623 | 119624 | 1.605 | Predicted | splice site                      |
| Splice_217  | 120163 | 120164 | 1.885 | Predicted | splice site                      |
| Splice_218  | 120468 | 120469 | 2.740 | Predicted | splice site                      |
| lmaj_03_038 | 120632 | 121744 | 0     | conserved | hypothetical protein,<br>unknown |
| Splice_219  | 121487 | 121488 | 2.320 | Predicted | splice site                      |
| Splice_220  | 121891 | 121892 | 2.093 | Predicted | splice site                      |
| Splice_221  | 122238 | 122239 | 2.656 | Predicted | splice site                      |
| Splice_222  | 122500 | 122501 | 1.588 | Predicted | splice site                      |
| Splice_223  | 122687 | 122688 | 2.715 | Predicted | splice site                      |
| Splice_224  | 122975 | 122976 | 1.861 | Predicted | splice site                      |
| Splice_225  | 123086 | 123087 | 2.012 | Predicted | splice site                      |
| Splice_226  | 123422 | 123423 | 2.775 | Predicted | splice site                      |
| Splice_227  | 123540 | 123541 | 1.756 | Predicted | splice site                      |
| Splice_228  | 123742 | 123743 | 2.595 | Predicted | splice site                      |
| Splice_229  | 124219 | 124220 | 3.104 | Predicted | splice site                      |
| Splice_230  | 124427 | 124428 | 2.589 | Predicted | splice site                      |
| Splice_231  | 124611 | 124612 | 2.673 | Predicted | splice site                      |
| Splice_232  | 124714 | 124715 | 1.572 | Predicted | splice site                      |
| Splice_233  | 124842 | 124843 | 1.572 | Predicted | splice site                      |
| Splice_234  | 125042 | 125043 | 2.595 | Predicted | splice site                      |
| Splice_235  | 125140 | 125141 | 2.093 | Predicted | splice site                      |
| Splice_236  | 125253 | 125254 | 2.230 | Predicted | splice site                      |
| lmaj_03_039 | 125348 | 126784 | 0     | conserved | hypothetical protein,<br>unknown |
| Splice_237  | 125913 | 125914 | 1.653 | Predicted | splice site                      |
| Splice_238  | 126001 | 126002 | 1.554 | Predicted | splice site                      |

Splice\_239 126200 126201 1.769 Predicted splice site  
 Splice\_240 126739 126740 2.990 Predicted splice site  
 Splice\_241 126856 126857 1.783 Predicted splice site  
 Splice\_242 127066 127067 1.756 Predicted splice site  
 Splice\_243 127152 127153 1.945 Predicted splice site  
 lmaj\_03\_040 127156 128067 0 conserved hypothetical protein,  
 unknown  
 Splice\_244 127834 127835 2.320 Predicted splice site  
 Splice\_245 128275 128276 1.537 Predicted splice site  
 Splice\_246 128416 128417 1.501 Predicted splice site  
 Splice\_247 128648 128649 2.477 Predicted splice site  
 Splice\_248 128937 128938 2.429 Predicted splice site  
 Splice\_249 129041 129042 1.637 Predicted splice site  
 Splice\_250 129400 129401 1.957 Predicted splice site  
 Splice\_251 129840 129841 2.093 Predicted splice site  
 Splice\_252 130118 130119 1.910 Predicted splice site  
 Splice\_253 130345 130346 2.214 Predicted splice site  
 Splice\_254 130969 130970 1.501 Predicted splice site  
 Splice\_255 131382 131383 1.898 Predicted splice site  
 Splice\_256 131470 131471 1.637 Predicted splice site  
 Splice\_257 131692 131693 1.572 Predicted splice site  
 lmaj\_03\_041 131775 133826 0 hypothetical protein,  
 unknown function  
 Splice\_258 132088 132089 1.874 Predicted splice site  
 Splice\_259 132207 132208 1.537 Predicted splice site  
 Splice\_260 132603 132604 1.898 Predicted splice site  
 Splice\_261 133207 133208 2.103 Predicted splice site  
 Splice\_262 133295 133296 1.989 Predicted splice site  
 Splice\_263 133490 133491 1.783 Predicted splice site  
 Splice\_264 133600 133601 1.910 Predicted splice site  
 Splice\_265 133920 133921 1.861 Predicted splice site  
 Splice\_266 134347 134348 1.934 Predicted splice site  
 Splice\_267 134581 134582 2.335 Predicted splice site  
 Splice\_268 134642 134643 1.637 Predicted splice site  
 Splice\_269 134868 134869 2.601 Predicted splice site  
 Splice\_270 135007 135008 1.783 Predicted splice site  
 Splice\_271 135547 135548 1.605 Predicted splice site  
 Splice\_272 136125 136126 1.501 Predicted splice site  
 Splice\_273 136216 136217 2.022 Predicted splice site  
 lmaj\_03\_042 136735 141885 0 hypothetical protein,  
 unknown function  
 Splice\_274 138276 138277 1.668 Predicted splice site  
 Splice\_275 138528 138529 1.554 Predicted splice site  
 Splice\_276 139867 139868 1.698 Predicted splice site  
 Splice\_277 141766 141767 1.554 Predicted splice site

Splice\_278 142160 142161 1.698 Predicted splice site  
 Splice\_279 142289 142290 2.358 Predicted splice site  
 Splice\_280 142536 142537 1.683 Predicted splice site  
 Splice\_281 142849 142850 2.746 Predicted splice site  
 lmaj\_03\_043 142929 143264 0 Ribosomal Protein P1,  
 putative  
 Splice\_282 142939 142940 1.885 Predicted splice site  
 Splice\_283 143547 143548 2.043 Predicted splice site  
 Splice\_284 143832 143833 2.247 Predicted splice site  
 lmaj\_03\_044 143880 144215 0 Ribosomal Protein P1,  
 putative  
 Splice\_285 144625 144626 1.728 Predicted splice site  
 Splice\_286 144740 144741 2.122 Predicted splice site  
 lmaj\_03\_045 145028 150139 0 hypothetical protein,  
 unknown function  
 Splice\_287 146768 146769 1.501 Predicted splice site  
 Splice\_288 150441 150442 1.849 Predicted splice site  
 Splice\_289 150610 150611 2.618 Predicted splice site  
 Splice\_290 150690 150691 1.605 Predicted splice site  
 Splice\_291 150778 150779 1.989 Predicted splice site  
 Splice\_292 151284 151285 2.756 Predicted splice site  
 Splice\_293 151607 151608 1.621 Predicted splice site  
 Splice\_294 151862 151863 2.522 Predicted splice site  
 Splice\_295 152259 152260 2.918 Predicted splice site  
 Splice\_296 152477 152478 2.457 Predicted splice site  
 Splice\_297 152616 152617 1.957 Predicted splice site  
 Splice\_298 152823 152824 1.823 Predicted splice site  
 Splice\_299 153444 153445 2.673 Predicted splice site  
 Splice\_300 153597 153598 1.501 Predicted splice site  
 Splice\_301 153745 153746 2.490 Predicted splice site  
 Splice\_302 153826 153827 1.769 Predicted splice site  
 Splice\_303 153913 153914 1.979 Predicted splice site  
 Splice\_304 153984 153985 1.728 Predicted splice site  
 Splice\_305 154049 154050 1.668 Predicted splice site  
 Splice\_306 154370 154371 2.033 Predicted splice site  
 Splice\_307 154796 154797 1.572 Predicted splice site  
 Splice\_308 155066 155067 2.343 Predicted splice site  
 Splice\_309 155167 155168 1.910 Predicted splice site  
 Splice\_310 155228 155229 1.637 Predicted splice site  
 Splice\_311 155364 155365 1.554 Predicted splice site  
 lmaj\_03\_046 155374 158562 0 hypothetical protein,  
 unknown function  
 Splice\_312 156397 156398 1.501 Predicted splice site  
 Splice\_313 156867 156868 1.957 Predicted splice site  
 Splice\_314 159017 159018 1.783 Predicted splice site

|             |        |        |       |              |                              |
|-------------|--------|--------|-------|--------------|------------------------------|
| Splice_315  | 159134 | 159135 | 2.103 | Predicted    | splice site                  |
| Splice_316  | 159230 | 159231 | 1.979 | Predicted    | splice site                  |
| Splice_317  | 159316 | 159317 | 1.967 | Predicted    | splice site                  |
| Splice_318  | 159492 | 159493 | 2.589 | Predicted    | splice site                  |
| Splice_319  | 159939 | 159940 | 2.808 | Predicted    | splice site                  |
| Splice_320  | 160434 | 160435 | 1.554 | Predicted    | splice site                  |
| Splice_321  | 160523 | 160524 | 2.001 | Predicted    | splice site                  |
| Splice_322  | 162293 | 162294 | 1.797 | Predicted    | splice site                  |
| Splice_323  | 162468 | 162469 | 2.064 | Predicted    | splice site                  |
| Splice_324  | 162649 | 162650 | 1.823 | Predicted    | splice site                  |
| Splice_325  | 162828 | 162829 | 2.559 | Predicted    | splice site                  |
| Splice_326  | 163012 | 163013 | 1.835 | Predicted    | splice site                  |
| Splice_327  | 163091 | 163092 | 1.572 | Predicted    | splice site                  |
| Splice_328  | 163269 | 163270 | 2.168 | Predicted    | splice site                  |
| lmaj_03_047 | 163294 | 166311 | 0     | hypothetical | protein,<br>unknown function |
| Splice_329  | 163819 | 163820 | 1.554 | Predicted    | splice site                  |
| Splice_330  | 165500 | 165501 | 1.537 | Predicted    | splice site                  |
| Splice_331  | 166462 | 166463 | 2.320 | Predicted    | splice site                  |
| Splice_332  | 166531 | 166532 | 1.756 | Predicted    | splice site                  |
| Splice_333  | 166954 | 166955 | 1.698 | Predicted    | splice site                  |
| Splice_334  | 167072 | 167073 | 1.605 | Predicted    | splice site                  |
| Splice_335  | 167223 | 167224 | 1.989 | Predicted    | splice site                  |
| Splice_336  | 167449 | 167450 | 2.296 | Predicted    | splice site                  |
| Splice_337  | 167524 | 167525 | 1.835 | Predicted    | splice site                  |
| Splice_338  | 167599 | 167600 | 1.713 | Predicted    | splice site                  |
| lmaj_03_048 | 167882 | 170911 | 0     | hypothetical | protein,<br>unknown function |
| Splice_339  | 169182 | 169183 | 1.742 | Predicted    | splice site                  |
| Splice_340  | 169625 | 169626 | 1.554 | Predicted    | splice site                  |
| Splice_341  | 169776 | 169777 | 1.797 | Predicted    | splice site                  |
| Splice_342  | 170510 | 170511 | 1.769 | Predicted    | splice site                  |
| Splice_343  | 171084 | 171085 | 1.621 | Predicted    | splice site                  |
| Splice_344  | 171173 | 171174 | 1.554 | Predicted    | splice site                  |
| Splice_345  | 172245 | 172246 | 2.668 | Predicted    | splice site                  |
| lmaj_03_049 | 172571 | 175639 | 0     | hypothetical | protein,<br>unknown function |
| Splice_346  | 174735 | 174736 | 1.668 | Predicted    | splice site                  |
| Splice_347  | 175106 | 175107 | 2.335 | Predicted    | splice site                  |
| Splice_348  | 175225 | 175226 | 2.053 | Predicted    | splice site                  |
| Splice_349  | 175805 | 175806 | 1.797 | Predicted    | splice site                  |
| Splice_350  | 175981 | 175982 | 2.656 | Predicted    | splice site                  |
| Splice_351  | 176215 | 176216 | 1.967 | Predicted    | splice site                  |
| Splice_352  | 176628 | 176629 | 2.789 | Predicted    | splice site                  |
| Splice_353  | 176849 | 176850 | 2.122 | Predicted    | splice site                  |

Splice\_354 176968 176969 2.033 Predicted splice site  
 lmaj\_03\_050 176975 178693 0 Phosphate-Repressible  
 Phosphate Permease-like  
 Splice\_355 177488 177489 2.033 Predicted splice site  
 Splice\_356 177582 177583 1.756 Predicted splice site  
 Splice\_357 178802 178803 1.945 Predicted splice site  
 Splice\_358 178958 178959 1.769 Predicted splice site  
 Splice\_359 179084 179085 2.335 Predicted splice site  
 Splice\_360 179210 179211 2.335 Predicted splice site  
 Splice\_361 179484 179485 2.818 Predicted splice site  
 Splice\_362 179857 179858 1.554 Predicted splice site  
 Splice\_363 180074 180075 1.874 Predicted splice site  
 Splice\_364 180398 180399 2.571 Predicted splice site  
 Splice\_365 180936 180937 2.084 Predicted splice site  
 Splice\_366 181140 181141 1.797 Predicted splice site  
 lmaj\_03\_051 181367 188830 0 hypothetical protein,  
 unknown function  
 Splice\_367 183275 183276 1.572 Predicted splice site  
 Splice\_368 186504 186505 1.501 Predicted splice site  
 Splice\_369 188431 188432 1.537 Predicted splice site  
 Splice\_370 189339 189340 1.605 Predicted splice site  
 lmaj\_03\_052 189467 191743 0 hypothetical protein,  
 unknown function  
 Splice\_371 191322 191323 2.012 Predicted splice site  
 Splice\_372 192306 192307 1.572 Predicted splice site  
 Splice\_373 192759 192760 1.698 Predicted splice site  
 lmaj\_03\_053 194007 200258 0 hypothetical protein,  
 unknown function  
 Splice\_374 198761 198762 1.554 Predicted splice site  
 Splice\_375 200795 200796 1.979 Predicted splice site  
 Splice\_376 200980 200981 1.835 Predicted splice site  
 Splice\_377 201344 201345 2.689 Predicted splice site  
 Splice\_378 201457 201458 2.022 Predicted splice site  
 lmaj\_03\_054 201966 203156 0 26S Protease Regulatory Subunit,  
 putative  
 Splice\_379 201970 201971 1.874 Predicted splice site  
 Splice\_380 203287 203288 1.501 Predicted splice site  
 Splice\_381 203397 203398 2.053 Predicted splice site  
 Splice\_382 203612 203613 2.230 Predicted splice site  
 Splice\_383 204044 204045 2.187 Predicted splice site  
 Splice\_384 204157 204158 1.910 Predicted splice site  
 Splice\_385 204246 204247 1.605 Predicted splice site  
 Splice\_386 204315 204316 1.605 Predicted splice site  
 Splice\_387 204628 204629 1.742 Predicted splice site  
 lmaj\_03\_055 204891 208841 0 hypothetical protein,



unknown function

Splice\_388 205000 205001 1.698 Predicted splice site

Splice\_389 205067 205068 1.520 Predicted splice site

Splice\_390 206469 206470 1.742 Predicted splice site

Splice\_391 206721 206722 2.001 Predicted splice site

Splice\_392 208158 208159 2.204 Predicted splice site

Splice\_393 208330 208331 1.621 Predicted splice site

Splice\_394 208841 208842 1.653 Predicted splice site

Splice\_395 209026 209027 2.103 Predicted splice site

Splice\_396 209211 209212 1.554 Predicted splice site

Splice\_397 209905 209906 2.662 Predicted splice site

Splice\_398 210022 210023 2.264 Predicted splice site

Splice\_399 210216 210217 2.387 Predicted splice site

lmaj\_03\_056 210310 212466 0 hypothetical protein,  
unknown function

Splice\_400 210704 210705 1.520 Predicted splice site

Splice\_401 211581 211582 1.885 Predicted splice site

Splice\_402 211707 211708 1.698 Predicted splice site

Splice\_403 212031 212032 1.898 Predicted splice site

Splice\_404 212780 212781 2.320 Predicted splice site

Splice\_405 212873 212874 1.910 Predicted splice site

Splice\_406 213037 213038 2.312 Predicted splice site

Splice\_407 213298 213299 1.605 Predicted splice site

Splice\_408 214979 214980 2.160 Predicted splice site

lmaj\_03\_057 215070 216068 0 Quinone Oxidoreductase,  
putative

Splice\_409 215220 215221 1.554 Predicted splice site

Splice\_410 216174 216175 1.989 Predicted splice site

Splice\_411 216453 216454 2.662 Predicted splice site

lmaj\_03\_058 216530 217066 0 hypothetical protein,  
unknown function

Splice\_412 217172 217173 1.605 Predicted splice site

Splice\_413 217261 217262 1.728 Predicted splice site

Splice\_414 217376 217377 2.247 Predicted splice site

Splice\_415 217551 217552 1.588 Predicted splice site

Splice\_416 218104 218105 1.861 Predicted splice site

Splice\_417 218354 218355 2.230 Predicted splice site

Splice\_418 218498 218499 2.239 Predicted splice site

Splice\_419 218782 218783 1.885 Predicted splice site

lmaj\_03\_059 219039 223118 0 hypothetical protein,  
unknown function

Splice\_420 223432 223433 1.572 Predicted splice site

Splice\_421 223573 223574 2.122 Predicted splice site

Splice\_422 223667 223668 1.922 Predicted splice site

lmaj\_03\_060 223728 224945 0 Protein Arginine

MethylTransferase-like protein

Splice\_423 225622 225623 2.084 Predicted splice site  
Splice\_424 226134 226135 1.979 Predicted splice site  
Splice\_425 226228 226229 1.520 Predicted splice site  
Splice\_426 226396 226397 1.554 Predicted splice site  
lmaj\_03\_061 226471 227520 0 Kinase-like protein  
Splice\_427 227908 227909 1.554 Predicted splice site  
Splice\_428 227969 227970 1.637 Predicted splice site  
Splice\_429 228126 228127 1.898 Predicted splice site  
Splice\_430 228385 228386 1.520 Predicted splice site  
Splice\_431 228520 228521 2.221 Predicted splice site  
lmaj\_03\_062 228710 230737 0 conserved hypothetical protein,  
unknown  
Splice\_432 232123 232124 2.423 Predicted splice site  
Splice\_433 232225 232226 2.132 Predicted splice site  
lmaj\_03\_063 232372 233349 0 hypothetical protein,  
unknown function  
Splice\_434 232669 232670 1.537 Predicted splice site  
Splice\_435 233105 233106 1.713 Predicted splice site  
Splice\_436 233735 233736 2.280 Predicted splice site  
Splice\_437 233810 233811 1.835 Predicted splice site  
lmaj\_03\_064 234148 235989 0 hypothetical protein,  
unknown function  
Splice\_438 234193 234194 2.497 Predicted splice site  
Splice\_439 235618 235619 1.554 Predicted splice site  
Splice\_440 236295 236296 1.537 Predicted splice site  
Splice\_441 236783 236784 1.823 Predicted splice site  
Splice\_442 236961 236962 1.537 Predicted splice site  
Splice\_443 237504 237505 2.372 Predicted splice site  
Splice\_444 237593 237594 1.967 Predicted splice site  
Splice\_445 237704 237705 2.168 Predicted splice site  
Splice\_446 237818 237819 2.239 Predicted splice site  
Splice\_447 238157 238158 2.893 Predicted splice site  
Splice\_448 238370 238371 2.122 Predicted splice site  
lmaj\_03\_065 238454 241135 0 hypothetical protein,  
unknown function  
Splice\_449 238491 238492 2.280 Predicted splice site  
Splice\_450 238578 238579 1.572 Predicted splice site  
Splice\_451 239430 239431 1.520 Predicted splice site  
Splice\_452 239676 239677 2.168 Predicted splice site  
Splice\_453 240617 240618 1.537 Predicted splice site  
Splice\_454 241221 241222 1.849 Predicted splice site  
Splice\_455 241535 241536 1.934 Predicted splice site  
Splice\_456 241653 241654 1.653 Predicted splice site  
Splice\_457 242073 242074 1.769 Predicted splice site

|             |        |        |       |                       |                  |
|-------------|--------|--------|-------|-----------------------|------------------|
| Splice_458  | 242153 | 242154 | 1.898 | Predicted             | splice site      |
| Splice_459  | 242229 | 242230 | 1.823 | Predicted             | splice site      |
| lmaj_03_066 | 242317 | 244599 | 0     | hypothetical protein, | unknown function |
| Splice_460  | 243106 | 243107 | 2.553 | Predicted             | splice site      |
| Splice_461  | 243446 | 243447 | 1.621 | Predicted             | splice site      |
| Splice_462  | 245125 | 245126 | 1.957 | Predicted             | splice site      |
| lmaj_03_067 | 245162 | 246871 | 0     | hypothetical protein, | unknown function |
| Splice_463  | 247084 | 247085 | 1.835 | Predicted             | splice site      |
| Splice_464  | 247250 | 247251 | 1.989 | Predicted             | splice site      |
| Splice_465  | 248518 | 248519 | 1.898 | Predicted             | splice site      |
| Splice_466  | 248809 | 248810 | 1.554 | Predicted             | splice site      |
| Splice_467  | 249756 | 249757 | 1.668 | Predicted             | splice site      |
| Splice_468  | 250713 | 250714 | 1.572 | Predicted             | splice site      |
| Splice_469  | 250828 | 250829 | 1.823 | Predicted             | splice site      |
| Splice_470  | 251226 | 251227 | 1.898 | Predicted             | splice site      |
| Splice_471  | 251310 | 251311 | 1.945 | Predicted             | splice site      |
| Splice_472  | 252226 | 252227 | 2.827 | Predicted             | splice site      |
| Splice_473  | 253609 | 253610 | 1.621 | Predicted             | splice site      |
| Splice_474  | 253837 | 253838 | 2.033 | Predicted             | splice site      |
| Splice_475  | 253932 | 253933 | 1.898 | Predicted             | splice site      |
| Splice_476  | 254774 | 254775 | 1.621 | Predicted             | splice site      |
| Splice_477  | 255035 | 255036 | 1.501 | Predicted             | splice site      |
| Splice_478  | 255104 | 255105 | 1.756 | Predicted             | splice site      |
| Splice_479  | 255697 | 255698 | 1.713 | Predicted             | splice site      |
| Splice_480  | 256902 | 256903 | 1.945 | Predicted             | splice site      |
| lmaj_03_068 | 257045 | 257905 | 0     | hypothetical protein, | unknown function |
| Splice_481  | 257079 | 257080 | 2.001 | Predicted             | splice site      |
| Splice_482  | 257809 | 257810 | 1.537 | Predicted             | splice site      |
| Splice_483  | 258204 | 258205 | 1.520 | Predicted             | splice site      |
| Splice_484  | 258831 | 258832 | 2.141 | Predicted             | splice site      |
| Splice_485  | 259901 | 259902 | 1.668 | Predicted             | splice site      |
| Splice_486  | 261914 | 261915 | 1.683 | Predicted             | splice site      |
| Splice_487  | 263077 | 263078 | 1.742 | Predicted             | splice site      |
| Splice_488  | 264683 | 264684 | 2.522 | Predicted             | splice site      |
| Splice_489  | 267128 | 267129 | 1.520 | Predicted             | splice site      |
| Splice_490  | 269880 | 269881 | 1.572 | Predicted             | splice site      |
| Splice_491  | 271117 | 271118 | 1.945 | Predicted             | splice site      |
| Splice_492  | 272195 | 272196 | 1.922 | Predicted             | splice site      |
| Splice_493  | 272606 | 272607 | 1.797 | Predicted             | splice site      |
| Splice_494  | 272975 | 272976 | 1.756 | Predicted             | splice site      |
| Splice_495  | 274434 | 274435 | 1.520 | Predicted             | splice site      |
| Splice_496  | 275624 | 275625 | 1.910 | Predicted             | splice site      |

|            |        |        |       |           |             |
|------------|--------|--------|-------|-----------|-------------|
| Splice_497 | 276860 | 276861 | 1.554 | Predicted | splice site |
| Splice_498 | 277376 | 277377 | 2.064 | Predicted | splice site |
| Splice_499 | 277521 | 277522 | 2.230 | Predicted | splice site |
| Splice_500 | 278073 | 278074 | 1.756 | Predicted | splice site |
| Splice_501 | 278484 | 278485 | 1.621 | Predicted | splice site |
| Splice_502 | 281929 | 281930 | 1.957 | Predicted | splice site |
| Splice_503 | 283079 | 283080 | 2.001 | Predicted | splice site |
| Splice_504 | 284060 | 284061 | 1.554 | Predicted | splice site |
| Splice_505 | 284953 | 284954 | 2.132 | Predicted | splice site |
| Splice_506 | 285244 | 285245 | 1.520 | Predicted | splice site |
| Splice_507 | 286142 | 286143 | 2.187 | Predicted | splice site |
| Splice_508 | 286400 | 286401 | 3.025 | Predicted | splice site |
| Splice_509 | 286680 | 286681 | 1.653 | Predicted | splice site |
| Splice_510 | 286930 | 286931 | 2.280 | Predicted | splice site |
| Splice_511 | 288880 | 288881 | 1.554 | Predicted | splice site |
| Splice_512 | 289439 | 289440 | 1.537 | Predicted | splice site |
| Splice_513 | 290698 | 290699 | 1.861 | Predicted | splice site |
| Splice_514 | 290787 | 290788 | 1.967 | Predicted | splice site |
| Splice_515 | 292618 | 292619 | 1.809 | Predicted | splice site |
| Splice_516 | 293242 | 293243 | 1.728 | Predicted | splice site |
| Splice_517 | 293889 | 293890 | 1.756 | Predicted | splice site |
| Splice_518 | 295287 | 295288 | 1.713 | Predicted | splice site |
| Splice_519 | 297951 | 297952 | 1.588 | Predicted | splice site |
| Splice_520 | 299094 | 299095 | 1.588 | Predicted | splice site |
| Splice_521 | 299655 | 299656 | 1.979 | Predicted | splice site |
| Splice_522 | 300182 | 300183 | 1.797 | Predicted | splice site |
| Splice_523 | 300561 | 300562 | 1.769 | Predicted | splice site |
| Splice_524 | 301577 | 301578 | 1.501 | Predicted | splice site |
| Splice_525 | 301669 | 301670 | 1.809 | Predicted | splice site |
| Splice_526 | 302584 | 302585 | 1.605 | Predicted | splice site |
| Splice_527 | 304538 | 304539 | 2.195 | Predicted | splice site |
| Splice_528 | 304689 | 304690 | 1.934 | Predicted | splice site |
| Splice_529 | 304964 | 304965 | 1.588 | Predicted | splice site |
| Splice_530 | 305147 | 305148 | 2.084 | Predicted | splice site |
| Splice_531 | 305779 | 305780 | 2.012 | Predicted | splice site |
| Splice_532 | 306777 | 306778 | 1.637 | Predicted | splice site |
| Splice_533 | 309985 | 309986 | 1.668 | Predicted | splice site |
| Splice_534 | 311695 | 311696 | 1.713 | Predicted | splice site |
| Splice_535 | 313762 | 313763 | 1.797 | Predicted | splice site |
| Splice_536 | 314829 | 314830 | 1.621 | Predicted | splice site |
| Splice_537 | 315127 | 315128 | 2.064 | Predicted | splice site |
| Splice_538 | 316522 | 316523 | 1.605 | Predicted | splice site |
| Splice_539 | 318001 | 318002 | 1.728 | Predicted | splice site |
| Splice_540 | 321971 | 321972 | 1.783 | Predicted | splice site |
| Splice_541 | 323498 | 323499 | 2.221 | Predicted | splice site |

|            |        |        |       |           |             |
|------------|--------|--------|-------|-----------|-------------|
| Splice_542 | 324475 | 324476 | 1.554 | Predicted | splice site |
| Splice_543 | 325253 | 325254 | 2.280 | Predicted | splice site |
| Splice_544 | 326252 | 326253 | 1.668 | Predicted | splice site |
| Splice_545 | 328148 | 328149 | 1.742 | Predicted | splice site |
| Splice_546 | 328458 | 328459 | 1.698 | Predicted | splice site |
| Splice_547 | 329001 | 329002 | 1.572 | Predicted | splice site |
| Splice_548 | 329367 | 329368 | 1.501 | Predicted | splice site |
| Splice_549 | 331884 | 331885 | 1.823 | Predicted | splice site |
| Splice_550 | 334590 | 334591 | 1.835 | Predicted | splice site |
| Splice_551 | 335458 | 335459 | 1.756 | Predicted | splice site |
| Splice_552 | 338023 | 338024 | 1.588 | Predicted | splice site |
| Splice_553 | 338239 | 338240 | 1.520 | Predicted | splice site |
| Splice_554 | 338741 | 338742 | 1.769 | Predicted | splice site |
| Splice_555 | 339092 | 339093 | 1.572 | Predicted | splice site |
| Splice_556 | 339984 | 339985 | 2.195 | Predicted | splice site |
| Splice_557 | 340375 | 340376 | 1.501 | Predicted | splice site |
| Splice_558 | 344129 | 344130 | 1.520 | Predicted | splice site |
| Splice_559 | 347039 | 347040 | 1.520 | Predicted | splice site |
| Splice_560 | 348419 | 348420 | 1.637 | Predicted | splice site |
| Splice_561 | 350937 | 350938 | 1.637 | Predicted | splice site |
| Splice_562 | 352345 | 352346 | 1.605 | Predicted | splice site |
| Splice_563 | 358195 | 358196 | 1.957 | Predicted | splice site |
| Splice_564 | 362920 | 362921 | 1.967 | Predicted | splice site |
| Splice_565 | 364683 | 364684 | 1.637 | Predicted | splice site |
| Splice_566 | 364979 | 364980 | 2.012 | Predicted | splice site |
| Splice_567 | 366585 | 366586 | 1.934 | Predicted | splice site |
| Splice_568 | 367412 | 367413 | 2.033 | Predicted | splice site |
| Splice_569 | 368250 | 368251 | 1.713 | Predicted | splice site |
| Splice_570 | 368408 | 368409 | 1.769 | Predicted | splice site |
| Splice_571 | 369190 | 369191 | 1.898 | Predicted | splice site |
| Splice_572 | 373588 | 373589 | 1.605 | Predicted | splice site |
| Splice_573 | 373795 | 373796 | 1.797 | Predicted | splice site |
| Splice_574 | 375446 | 375447 | 2.064 | Predicted | splice site |
| Splice_575 | 375550 | 375551 | 1.783 | Predicted | splice site |
| Splice_576 | 378466 | 378467 | 2.012 | Predicted | splice site |
| Splice_577 | 380226 | 380227 | 2.204 | Predicted | splice site |
| Splice_578 | 381138 | 381139 | 1.520 | Predicted | splice site |
| Splice_579 | 381214 | 381215 | 1.849 | Predicted | splice site |
| Splice_580 | 381499 | 381500 | 2.366 | Predicted | splice site |
| Splice_581 | 382291 | 382292 | 1.728 | Predicted | splice site |
| Splice_582 | 382884 | 382885 | 1.668 | Predicted | splice site |

### Predictions for the Reverse Strand of Chromosome 3

Splice\_1 688 689 1.605 Predicted splice site  
Splice\_2 742 743 1.520 Predicted splice site  
Splice\_3 799 800 1.520 Predicted splice site  
lmaj\_03\_098 1944 3242 0 Elongation Initiation Factor 2,  
alpha subunit,  
Splice\_4 1974 1975 2.522 Predicted splice site  
Splice\_5 3422 3423 1.797 Predicted splice site  
Splice\_6 3529 3530 2.053 Predicted splice site  
Splice\_7 3830 3831 2.113 Predicted splice site  
lmaj\_03\_097 3925 4989 0 conserved hypothetical protein,  
unknown  
Splice\_8 3955 3956 2.327 Predicted splice site  
Splice\_9 5112 5113 1.910 Predicted splice site  
Splice\_10 5463 5464 2.320 Predicted splice site  
lmaj\_03\_096 5531 5845 0 hypothetical protein,  
unknown function  
Splice\_11 6447 6448 2.387 Predicted splice site  
Splice\_12 6556 6557 1.572 Predicted splice site  
lmaj\_03\_095 6740 8410 0 oxidase-like protein  
Splice\_13 8713 8714 2.350 Predicted splice site  
Splice\_14 8801 8802 1.989 Predicted splice site  
Splice\_15 8933 8934 2.239 Predicted splice site  
Splice\_16 9389 9390 2.022 Predicted splice site  
Splice\_17 9661 9662 1.637 Predicted splice site  
lmaj\_03\_094 9896 10882 0 hypothetical protein,  
unknown function  
Splice\_18 10966 10967 1.742 Predicted splice site  
Splice\_19 11063 11064 1.885 Predicted splice site  
Splice\_20 11417 11418 2.652 Predicted splice site  
Splice\_21 11494 11495 1.861 Predicted splice site  
lmaj\_03\_093 11508 13601 0 hypothetical protein,  
unknown function  
Splice\_22 11857 11858 1.605 Predicted splice site  
Splice\_23 12348 12349 1.898 Predicted splice site  
Splice\_24 13656 13657 1.823 Predicted splice site  
Splice\_25 13720 13721 1.683 Predicted splice site  
Splice\_26 13857 13858 2.416 Predicted splice site  
Splice\_27 14159 14160 2.646 Predicted splice site  
Splice\_28 14360 14361 2.256 Predicted splice site  
Splice\_29 14579 14580 2.103 Predicted splice site  
lmaj\_03\_092 14665 15321 0 hypothetical conserved protein,  
unknown  
Splice\_30 14934 14935 1.537 Predicted splice site

Splice\_31 15035 15036 1.728 Predicted splice site  
 Splice\_32 15679 15680 2.380 Predicted splice site  
 Splice\_33 15947 15948 1.698 Predicted splice site  
 lmaj\_03\_091 16128 16808 0 Inorganic Pyrophosphatase-like  
 protein  
 Splice\_34 16234 16235 1.823 Predicted splice site  
 Splice\_35 17121 17122 1.809 Predicted splice site  
 Splice\_36 17331 17332 1.885 Predicted splice site  
 Splice\_37 17423 17424 1.797 Predicted splice site  
 Splice\_38 17655 17656 2.618 Predicted splice site  
 Splice\_39 17953 17954 2.022 Predicted splice site  
 lmaj\_03\_090 17972 19096 0 second-step splicing  
 factor-like protein  
 Splice\_40 19262 19263 2.053 Predicted splice site  
 Splice\_41 19390 19391 2.350 Predicted splice site  
 Splice\_42 20236 20237 2.380 Predicted splice site  
 lmaj\_03\_089 21327 23543 0 hypothetical protein,  
 unknown function  
 Splice\_43 23807 23808 1.945 Predicted splice site  
 Splice\_44 23890 23891 1.934 Predicted splice site  
 lmaj\_03\_088 24461 30262 0 hypothetical protein,  
 unknown function  
 Splice\_45 30390 30391 2.103 Predicted splice site  
 Splice\_46 30469 30470 1.797 Predicted splice site  
 Splice\_47 30806 30807 1.520 Predicted splice site  
 Splice\_48 31021 31022 1.554 Predicted splice site  
 lmaj\_03\_087 31242 35414 0 Leucine Rich Repeat  
 containing protein,  
 Splice\_49 31247 31248 1.668 Predicted splice site  
 Splice\_50 33196 33197 1.572 Predicted splice site  
 Splice\_51 35718 35719 2.103 Predicted splice site  
 Splice\_52 35986 35987 1.668 Predicted splice site  
 lmaj\_03\_086 36369 40760 0 hypothetical protein,  
 unknown function  
 Splice\_53 41286 41287 1.967 Predicted splice site  
 Splice\_54 41533 41534 2.471 Predicted splice site  
 Splice\_55 41694 41695 1.756 Predicted splice site  
 lmaj\_03\_085 41698 48846 0 hypothetical protein,  
 unknown function  
 Splice\_56 42662 42663 1.979 Predicted splice site  
 Splice\_57 44547 44548 1.520 Predicted splice site  
 Splice\_58 46820 46821 2.423 Predicted splice site  
 Splice\_59 48447 48448 1.537 Predicted splice site  
 Splice\_60 48987 48988 2.012 Predicted splice site  
 Splice\_61 49053 49054 1.713 Predicted splice site

Splice\_62 49586 49587 2.132 Predicted splice site  
 Splice\_63 49686 49687 1.713 Predicted splice site  
 lmaj\_03\_084 49706 52630 0 hypothetical protein,  
 unknown function  
 Splice\_64 50100 50101 1.621 Predicted splice site  
 Splice\_65 52887 52888 1.835 Predicted splice site  
 Splice\_66 53144 53145 2.335 Predicted splice site  
 Splice\_67 53591 53592 2.967 Predicted splice site  
 lmaj\_03\_083 53730 54941 0 hypothetical protein,  
 unknown function  
 Splice\_68 53737 53738 1.756 Predicted splice site  
 Splice\_69 55109 55110 2.053 Predicted splice site  
 Splice\_70 55432 55433 1.809 Predicted splice site  
 Splice\_71 55517 55518 1.861 Predicted splice site  
 Splice\_72 55667 55668 1.898 Predicted splice site  
 Splice\_73 56007 56008 2.840 Predicted splice site  
 Splice\_74 56336 56337 2.577 Predicted splice site  
 lmaj\_03\_082 56454 65264 0 hypothetical protein,  
 unknown function  
 Splice\_75 56689 56690 1.501 Predicted splice site  
 Splice\_76 56927 56928 1.588 Predicted splice site  
 Splice\_77 60599 60600 1.885 Predicted splice site  
 Splice\_78 65329 65330 1.520 Predicted splice site  
 Splice\_79 65574 65575 2.534 Predicted splice site  
 Splice\_80 65776 65777 2.022 Predicted splice site  
 Splice\_81 65854 65855 1.874 Predicted splice site  
 lmaj\_03\_081 66053 69289 0 hypothetical protein,  
 unknown function  
 Splice\_82 67418 67419 2.064 Predicted splice site  
 Splice\_83 69354 69355 1.554 Predicted splice site  
 Splice\_84 69672 69673 2.350 Predicted splice site  
 Splice\_85 70087 70088 2.012 Predicted splice site  
 Splice\_86 70219 70220 2.012 Predicted splice site  
 Splice\_87 70317 70318 1.823 Predicted splice site  
 Splice\_88 70448 70449 2.187 Predicted splice site  
 lmaj\_03\_080 70538 77806 0 6-PhosphoFructo-2-Kinase-like  
 protein  
 Splice\_89 70541 70542 1.653 Predicted splice site  
 Splice\_90 72115 72116 2.132 Predicted splice site  
 Splice\_91 75186 75187 1.934 Predicted splice site  
 Splice\_92 76497 76498 1.769 Predicted splice site  
 Splice\_93 78103 78104 2.204 Predicted splice site  
 Splice\_94 78188 78189 1.957 Predicted splice site  
 Splice\_95 78507 78508 2.141 Predicted splice site  
 lmaj\_03\_079 78532 79839 0 hypothetical protein,



unknown function  
 Splice\_96 80315 80316 2.187 Predicted splice site  
 Splice\_97 80502 80503 1.989 Predicted splice site  
 Splice\_98 81170 81171 2.931 Predicted splice site  
 Splice\_99 81332 81333 1.653 Predicted splice site  
 Splice\_100 81450 81451 2.272 Predicted splice site  
 Splice\_101 81528 81529 1.683 Predicted splice site  
 Splice\_102 81607 81608 1.885 Predicted splice site  
 lmaj\_03\_078 81616 90954 0 hypothetical protein,  
 unknown function  
 Splice\_103 81846 81847 1.520 Predicted splice site  
 Splice\_104 82751 82752 1.588 Predicted splice site  
 Splice\_105 83638 83639 1.668 Predicted splice site  
 Splice\_106 91228 91229 1.849 Predicted splice site  
 Splice\_107 91612 91613 2.668 Predicted splice site  
 Splice\_108 91758 91759 2.043 Predicted splice site  
 lmaj\_03\_077 91788 93428 0 hypothetical protein,  
 unknown function  
 Splice\_109 93746 93747 2.141 Predicted splice site  
 Splice\_110 93861 93862 1.809 Predicted splice site  
 Splice\_111 94073 94074 2.073 Predicted splice site  
 Splice\_112 94194 94195 1.945 Predicted splice site  
 lmaj\_03\_076 94273 95223 0 hypothetical protein,  
 unknown function  
 Splice\_113 95642 95643 2.053 Predicted splice site  
 Splice\_114 95915 95916 2.372 Predicted splice site  
 lmaj\_03\_075 96084 98351 0 hypothetical protein,  
 unknown function  
 Splice\_115 98890 98891 1.683 Predicted splice site  
 Splice\_116 98969 98970 1.621 Predicted splice site  
 lmaj\_03\_074 99044 99298 0 copper chaperone-like protein  
 Splice\_117 99377 99378 1.653 Predicted splice site  
 Splice\_118 99522 99523 2.122 Predicted splice site  
 Splice\_119 99861 99862 1.809 Predicted splice site  
 Splice\_120 100034 100035 1.605 Predicted splice site  
 Splice\_121 100161 100162 2.103 Predicted splice site  
 lmaj\_03\_073 100183 101388 0 hypothetical protein,  
 unknown function  
 Splice\_122 100383 100384 1.756 Predicted splice site  
 Splice\_123 102158 102159 1.605 Predicted splice site  
 Splice\_124 102845 102846 2.683 Predicted splice site  
 lmaj\_03\_072 103631 106252 0 hypothetical protein,  
 unknown function  
 Splice\_125 104064 104065 1.756 Predicted splice site  
 Splice\_126 106453 106454 1.797 Predicted splice site

|             |        |        |       |              |                              |
|-------------|--------|--------|-------|--------------|------------------------------|
| Splice_127  | 106625 | 106626 | 1.501 | Predicted    | splice site                  |
| Splice_128  | 106799 | 106800 | 1.637 | Predicted    | splice site                  |
| lmaj_03_071 | 106842 | 107603 | 0     | hypothetical | protein,<br>unknown function |
| Splice_129  | 107931 | 107932 | 1.989 | Predicted    | splice site                  |
| Splice_130  | 108239 | 108240 | 1.797 | Predicted    | splice site                  |
| Splice_131  | 108323 | 108324 | 1.698 | Predicted    | splice site                  |
| Splice_132  | 108389 | 108390 | 1.713 | Predicted    | splice site                  |
| lmaj_03_070 | 108444 | 116918 | 0     | hypothetical | protein,<br>unknown function |
| Splice_133  | 111328 | 111329 | 1.537 | Predicted    | splice site                  |
| Splice_134  | 116219 | 116220 | 1.572 | Predicted    | splice site                  |
| Splice_135  | 117126 | 117127 | 1.797 | Predicted    | splice site                  |
| Splice_136  | 117537 | 117538 | 1.605 | Predicted    | splice site                  |
| Splice_137  | 117604 | 117605 | 1.728 | Predicted    | splice site                  |
| lmaj_03_069 | 117704 | 124339 | 0     | hypothetical | protein,<br>unknown function |
| Splice_138  | 121428 | 121429 | 1.572 | Predicted    | splice site                  |
| Splice_139  | 125028 | 125029 | 2.150 | Predicted    | splice site                  |
| Splice_140  | 128189 | 128190 | 1.698 | Predicted    | splice site                  |
| Splice_141  | 128544 | 128545 | 1.783 | Predicted    | splice site                  |
| Splice_142  | 129975 | 129976 | 1.742 | Predicted    | splice site                  |
| Splice_143  | 130866 | 130867 | 1.537 | Predicted    | splice site                  |
| Splice_144  | 131100 | 131101 | 1.572 | Predicted    | splice site                  |
| Splice_145  | 131159 | 131160 | 1.605 | Predicted    | splice site                  |
| Splice_146  | 131647 | 131648 | 2.012 | Predicted    | splice site                  |
| Splice_147  | 133537 | 133538 | 1.809 | Predicted    | splice site                  |
| Splice_148  | 134130 | 134131 | 2.022 | Predicted    | splice site                  |
| Splice_149  | 134577 | 134578 | 1.588 | Predicted    | splice site                  |
| Splice_150  | 134799 | 134800 | 1.588 | Predicted    | splice site                  |
| Splice_151  | 134913 | 134914 | 1.605 | Predicted    | splice site                  |
| Splice_152  | 135080 | 135081 | 1.934 | Predicted    | splice site                  |
| Splice_153  | 135150 | 135151 | 1.520 | Predicted    | splice site                  |
| Splice_154  | 135227 | 135228 | 1.861 | Predicted    | splice site                  |
| Splice_155  | 135528 | 135529 | 1.898 | Predicted    | splice site                  |
| Splice_156  | 135815 | 135816 | 1.605 | Predicted    | splice site                  |
| Splice_157  | 136285 | 136286 | 2.416 | Predicted    | splice site                  |
| Splice_158  | 136369 | 136370 | 1.945 | Predicted    | splice site                  |
| Splice_159  | 137477 | 137478 | 2.022 | Predicted    | splice site                  |
| Splice_160  | 139811 | 139812 | 1.898 | Predicted    | splice site                  |
| Splice_161  | 140043 | 140044 | 1.537 | Predicted    | splice site                  |
| Splice_162  | 143092 | 143093 | 2.187 | Predicted    | splice site                  |
| Splice_163  | 143145 | 143146 | 1.501 | Predicted    | splice site                  |
| Splice_164  | 144604 | 144605 | 1.835 | Predicted    | splice site                  |
| Splice_165  | 145011 | 145012 | 1.554 | Predicted    | splice site                  |

|            |        |        |       |           |             |
|------------|--------|--------|-------|-----------|-------------|
| Splice_166 | 145423 | 145424 | 1.572 | Predicted | splice site |
| Splice_167 | 145519 | 145520 | 1.501 | Predicted | splice site |
| Splice_168 | 147429 | 147430 | 1.910 | Predicted | splice site |
| Splice_169 | 147562 | 147563 | 1.637 | Predicted | splice site |
| Splice_170 | 147657 | 147658 | 1.605 | Predicted | splice site |
| Splice_171 | 148486 | 148487 | 1.967 | Predicted | splice site |
| Splice_172 | 150566 | 150567 | 1.588 | Predicted | splice site |
| Splice_173 | 151798 | 151799 | 1.588 | Predicted | splice site |
| Splice_174 | 153149 | 153150 | 2.132 | Predicted | splice site |
| Splice_175 | 156737 | 156738 | 1.898 | Predicted | splice site |
| Splice_176 | 156871 | 156872 | 2.395 | Predicted | splice site |
| Splice_177 | 157044 | 157045 | 2.490 | Predicted | splice site |
| Splice_178 | 157475 | 157476 | 1.874 | Predicted | splice site |
| Splice_179 | 159574 | 159575 | 2.256 | Predicted | splice site |
| Splice_180 | 159685 | 159686 | 1.934 | Predicted | splice site |
| Splice_181 | 161244 | 161245 | 1.885 | Predicted | splice site |
| Splice_182 | 161388 | 161389 | 2.168 | Predicted | splice site |
| Splice_183 | 163906 | 163907 | 2.256 | Predicted | splice site |
| Splice_184 | 165440 | 165441 | 1.621 | Predicted | splice site |
| Splice_185 | 166420 | 166421 | 2.053 | Predicted | splice site |
| Splice_186 | 166626 | 166627 | 1.520 | Predicted | splice site |
| Splice_187 | 166882 | 166883 | 1.742 | Predicted | splice site |
| Splice_188 | 167063 | 167064 | 1.756 | Predicted | splice site |
| Splice_189 | 167131 | 167132 | 1.742 | Predicted | splice site |
| Splice_190 | 167529 | 167530 | 1.728 | Predicted | splice site |
| Splice_191 | 169119 | 169120 | 1.621 | Predicted | splice site |
| Splice_192 | 169481 | 169482 | 1.713 | Predicted | splice site |
| Splice_193 | 169846 | 169847 | 1.769 | Predicted | splice site |
| Splice_194 | 170470 | 170471 | 1.922 | Predicted | splice site |
| Splice_195 | 170763 | 170764 | 2.053 | Predicted | splice site |
| Splice_196 | 174728 | 174729 | 1.861 | Predicted | splice site |
| Splice_197 | 175486 | 175487 | 1.809 | Predicted | splice site |
| Splice_198 | 175628 | 175629 | 1.823 | Predicted | splice site |
| Splice_199 | 176124 | 176125 | 2.150 | Predicted | splice site |
| Splice_200 | 177339 | 177340 | 2.256 | Predicted | splice site |
| Splice_201 | 177653 | 177654 | 1.520 | Predicted | splice site |
| Splice_202 | 177746 | 177747 | 1.874 | Predicted | splice site |
| Splice_203 | 177816 | 177817 | 1.769 | Predicted | splice site |
| Splice_204 | 179215 | 179216 | 1.605 | Predicted | splice site |
| Splice_205 | 180214 | 180215 | 2.043 | Predicted | splice site |
| Splice_206 | 180744 | 180745 | 2.168 | Predicted | splice site |
| Splice_207 | 183509 | 183510 | 1.605 | Predicted | splice site |
| Splice_208 | 183729 | 183730 | 2.195 | Predicted | splice site |
| Splice_209 | 183914 | 183915 | 1.967 | Predicted | splice site |
| Splice_210 | 184157 | 184158 | 1.520 | Predicted | splice site |

|            |        |        |       |           |             |
|------------|--------|--------|-------|-----------|-------------|
| Splice_211 | 184220 | 184221 | 1.668 | Predicted | splice site |
| Splice_212 | 188061 | 188062 | 1.501 | Predicted | splice site |
| Splice_213 | 190682 | 190683 | 1.572 | Predicted | splice site |
| Splice_214 | 192192 | 192193 | 2.141 | Predicted | splice site |
| Splice_215 | 192688 | 192689 | 2.073 | Predicted | splice site |
| Splice_216 | 192752 | 192753 | 1.683 | Predicted | splice site |
| Splice_217 | 192859 | 192860 | 1.653 | Predicted | splice site |
| Splice_218 | 192995 | 192996 | 1.713 | Predicted | splice site |
| Splice_219 | 194579 | 194580 | 1.572 | Predicted | splice site |
| Splice_220 | 195547 | 195548 | 1.967 | Predicted | splice site |
| Splice_221 | 198699 | 198700 | 1.572 | Predicted | splice site |
| Splice_222 | 199092 | 199093 | 2.022 | Predicted | splice site |
| Splice_223 | 200328 | 200329 | 1.588 | Predicted | splice site |
| Splice_224 | 201247 | 201248 | 1.683 | Predicted | splice site |
| Splice_225 | 202462 | 202463 | 2.247 | Predicted | splice site |
| Splice_226 | 203294 | 203295 | 1.698 | Predicted | splice site |
| Splice_227 | 203427 | 203428 | 1.520 | Predicted | splice site |
| Splice_228 | 203503 | 203504 | 1.653 | Predicted | splice site |
| Splice_229 | 203810 | 203811 | 1.957 | Predicted | splice site |
| Splice_230 | 203908 | 203909 | 1.728 | Predicted | splice site |
| Splice_231 | 204033 | 204034 | 2.103 | Predicted | splice site |
| Splice_232 | 204588 | 204589 | 1.554 | Predicted | splice site |
| Splice_233 | 204869 | 204870 | 1.979 | Predicted | splice site |
| Splice_234 | 204957 | 204958 | 1.989 | Predicted | splice site |
| Splice_235 | 206608 | 206609 | 1.713 | Predicted | splice site |
| Splice_236 | 208838 | 208839 | 1.713 | Predicted | splice site |
| Splice_237 | 210616 | 210617 | 1.621 | Predicted | splice site |
| Splice_238 | 211046 | 211047 | 2.395 | Predicted | splice site |
| Splice_239 | 211716 | 211717 | 1.501 | Predicted | splice site |
| Splice_240 | 211947 | 211948 | 1.668 | Predicted | splice site |
| Splice_241 | 212312 | 212313 | 2.477 | Predicted | splice site |
| Splice_242 | 212561 | 212562 | 1.683 | Predicted | splice site |
| Splice_243 | 212973 | 212974 | 2.132 | Predicted | splice site |
| Splice_244 | 213065 | 213066 | 2.033 | Predicted | splice site |
| Splice_245 | 213367 | 213368 | 1.537 | Predicted | splice site |
| Splice_246 | 213588 | 213589 | 1.572 | Predicted | splice site |
| Splice_247 | 214370 | 214371 | 1.885 | Predicted | splice site |
| Splice_248 | 216700 | 216701 | 1.572 | Predicted | splice site |
| Splice_249 | 217815 | 217816 | 1.637 | Predicted | splice site |
| Splice_250 | 218001 | 218002 | 1.588 | Predicted | splice site |
| Splice_251 | 218260 | 218261 | 1.756 | Predicted | splice site |
| Splice_252 | 219389 | 219390 | 1.756 | Predicted | splice site |
| Splice_253 | 220042 | 220043 | 1.668 | Predicted | splice site |
| Splice_254 | 222005 | 222006 | 1.910 | Predicted | splice site |
| Splice_255 | 223201 | 223202 | 1.554 | Predicted | splice site |

|            |        |        |       |           |             |
|------------|--------|--------|-------|-----------|-------------|
| Splice_256 | 224350 | 224351 | 2.380 | Predicted | splice site |
| Splice_257 | 224529 | 224530 | 1.683 | Predicted | splice site |
| Splice_258 | 224880 | 224881 | 1.967 | Predicted | splice site |
| Splice_259 | 225063 | 225064 | 2.387 | Predicted | splice site |
| Splice_260 | 225890 | 225891 | 2.064 | Predicted | splice site |
| Splice_261 | 230387 | 230388 | 2.141 | Predicted | splice site |
| Splice_262 | 233087 | 233088 | 1.501 | Predicted | splice site |
| Splice_263 | 233669 | 233670 | 1.668 | Predicted | splice site |
| Splice_264 | 237661 | 237662 | 1.683 | Predicted | splice site |
| Splice_265 | 239618 | 239619 | 1.698 | Predicted | splice site |
| Splice_266 | 240392 | 240393 | 1.809 | Predicted | splice site |
| Splice_267 | 241211 | 241212 | 1.520 | Predicted | splice site |
| Splice_268 | 241343 | 241344 | 1.809 | Predicted | splice site |
| Splice_269 | 242769 | 242770 | 1.809 | Predicted | splice site |
| Splice_270 | 242854 | 242855 | 1.653 | Predicted | splice site |
| Splice_271 | 245261 | 245262 | 2.022 | Predicted | splice site |
| Splice_272 | 247661 | 247662 | 1.835 | Predicted | splice site |
| Splice_273 | 248763 | 248764 | 1.957 | Predicted | splice site |
| Splice_274 | 248883 | 248884 | 1.769 | Predicted | splice site |
| Splice_275 | 249161 | 249162 | 1.637 | Predicted | splice site |
| Splice_276 | 249880 | 249881 | 1.874 | Predicted | splice site |
| Splice_277 | 250183 | 250184 | 1.967 | Predicted | splice site |
| Splice_278 | 250493 | 250494 | 2.583 | Predicted | splice site |
| Splice_279 | 251686 | 251687 | 2.380 | Predicted | splice site |
| Splice_280 | 253666 | 253667 | 1.861 | Predicted | splice site |
| Splice_281 | 253725 | 253726 | 1.605 | Predicted | splice site |
| Splice_282 | 254017 | 254018 | 2.335 | Predicted | splice site |
| Splice_283 | 254692 | 254693 | 1.967 | Predicted | splice site |
| Splice_284 | 255121 | 255122 | 2.387 | Predicted | splice site |
| Splice_285 | 255303 | 255304 | 1.756 | Predicted | splice site |
| Splice_286 | 256428 | 256429 | 1.520 | Predicted | splice site |
| Splice_287 | 258245 | 258246 | 1.554 | Predicted | splice site |
| Splice_288 | 260566 | 260567 | 3.329 | Predicted | splice site |
| Splice_289 | 260987 | 260988 | 1.501 | Predicted | splice site |
| Splice_290 | 262803 | 262804 | 1.769 | Predicted | splice site |
| Splice_291 | 264462 | 264463 | 1.756 | Predicted | splice site |
| Splice_292 | 265212 | 265213 | 2.239 | Predicted | splice site |
| Splice_293 | 265548 | 265549 | 2.022 | Predicted | splice site |
| Splice_294 | 270793 | 270794 | 1.989 | Predicted | splice site |
| Splice_295 | 270974 | 270975 | 1.835 | Predicted | splice site |
| Splice_296 | 271217 | 271218 | 1.668 | Predicted | splice site |
| Splice_297 | 271497 | 271498 | 1.537 | Predicted | splice site |
| Splice_298 | 272241 | 272242 | 1.797 | Predicted | splice site |
| Splice_299 | 273589 | 273590 | 1.683 | Predicted | splice site |
| Splice_300 | 273669 | 273670 | 1.572 | Predicted | splice site |

|            |        |        |       |           |             |
|------------|--------|--------|-------|-----------|-------------|
| Splice_301 | 276690 | 276691 | 2.178 | Predicted | splice site |
| Splice_302 | 278228 | 278229 | 2.093 | Predicted | splice site |
| Splice_303 | 278371 | 278372 | 1.728 | Predicted | splice site |
| Splice_304 | 278506 | 278507 | 1.588 | Predicted | splice site |
| Splice_305 | 279486 | 279487 | 2.064 | Predicted | splice site |
| Splice_306 | 279875 | 279876 | 1.683 | Predicted | splice site |
| Splice_307 | 280238 | 280239 | 1.809 | Predicted | splice site |
| Splice_308 | 280974 | 280975 | 1.823 | Predicted | splice site |
| Splice_309 | 281750 | 281751 | 2.746 | Predicted | splice site |
| Splice_310 | 283071 | 283072 | 1.621 | Predicted | splice site |
| Splice_311 | 284709 | 284710 | 2.656 | Predicted | splice site |
| Splice_312 | 285655 | 285656 | 2.073 | Predicted | splice site |
| Splice_313 | 286141 | 286142 | 1.934 | Predicted | splice site |
| Splice_314 | 287470 | 287471 | 1.653 | Predicted | splice site |
| Splice_315 | 290698 | 290699 | 1.698 | Predicted | splice site |
| Splice_316 | 291226 | 291227 | 1.637 | Predicted | splice site |
| Splice_317 | 292763 | 292764 | 1.668 | Predicted | splice site |
| Splice_318 | 293111 | 293112 | 2.195 | Predicted | splice site |
| Splice_319 | 293519 | 293520 | 2.160 | Predicted | splice site |
| Splice_320 | 295021 | 295022 | 1.683 | Predicted | splice site |
| Splice_321 | 295181 | 295182 | 1.605 | Predicted | splice site |
| Splice_322 | 297587 | 297588 | 1.934 | Predicted | splice site |
| Splice_323 | 299383 | 299384 | 1.537 | Predicted | splice site |
| Splice_324 | 299639 | 299640 | 1.698 | Predicted | splice site |
| Splice_325 | 300602 | 300603 | 1.713 | Predicted | splice site |
| Splice_326 | 300743 | 300744 | 1.572 | Predicted | splice site |
| Splice_327 | 302104 | 302105 | 1.769 | Predicted | splice site |
| Splice_328 | 304493 | 304494 | 1.637 | Predicted | splice site |
| Splice_329 | 304801 | 304802 | 1.653 | Predicted | splice site |
| Splice_330 | 305419 | 305420 | 2.380 | Predicted | splice site |
| Splice_331 | 308575 | 308576 | 1.945 | Predicted | splice site |
| Splice_332 | 310994 | 310995 | 1.742 | Predicted | splice site |
| Splice_333 | 311123 | 311124 | 2.168 | Predicted | splice site |
| Splice_334 | 312863 | 312864 | 1.668 | Predicted | splice site |
| Splice_335 | 313049 | 313050 | 1.835 | Predicted | splice site |
| Splice_336 | 313124 | 313125 | 1.520 | Predicted | splice site |
| Splice_337 | 319572 | 319573 | 1.537 | Predicted | splice site |
| Splice_338 | 319807 | 319808 | 2.012 | Predicted | splice site |
| Splice_339 | 321703 | 321704 | 1.653 | Predicted | splice site |
| Splice_340 | 321906 | 321907 | 1.742 | Predicted | splice site |
| Splice_341 | 322099 | 322100 | 1.554 | Predicted | splice site |
| Splice_342 | 322360 | 322361 | 1.713 | Predicted | splice site |
| Splice_343 | 324529 | 324530 | 2.073 | Predicted | splice site |
| Splice_344 | 324919 | 324920 | 2.113 | Predicted | splice site |
| Splice_345 | 325546 | 325547 | 1.957 | Predicted | splice site |

|            |        |        |       |           |             |
|------------|--------|--------|-------|-----------|-------------|
| Splice_346 | 325645 | 325646 | 1.823 | Predicted | splice site |
| Splice_347 | 326276 | 326277 | 1.520 | Predicted | splice site |
| Splice_348 | 326401 | 326402 | 2.073 | Predicted | splice site |
| Splice_349 | 327018 | 327019 | 1.572 | Predicted | splice site |
| Splice_350 | 328224 | 328225 | 1.520 | Predicted | splice site |
| Splice_351 | 328713 | 328714 | 1.605 | Predicted | splice site |
| Splice_352 | 329131 | 329132 | 1.989 | Predicted | splice site |
| Splice_353 | 331109 | 331110 | 1.537 | Predicted | splice site |
| Splice_354 | 331178 | 331179 | 1.756 | Predicted | splice site |
| Splice_355 | 331278 | 331279 | 2.113 | Predicted | splice site |
| Splice_356 | 331561 | 331562 | 1.922 | Predicted | splice site |
| Splice_357 | 333293 | 333294 | 2.132 | Predicted | splice site |
| Splice_358 | 333460 | 333461 | 1.957 | Predicted | splice site |
| Splice_359 | 333587 | 333588 | 1.797 | Predicted | splice site |
| Splice_360 | 334383 | 334384 | 1.683 | Predicted | splice site |
| Splice_361 | 336818 | 336819 | 2.084 | Predicted | splice site |
| Splice_362 | 337321 | 337322 | 1.668 | Predicted | splice site |
| Splice_363 | 337767 | 337768 | 1.742 | Predicted | splice site |
| Splice_364 | 341915 | 341916 | 1.621 | Predicted | splice site |
| Splice_365 | 343002 | 343003 | 2.679 | Predicted | splice site |
| Splice_366 | 343302 | 343303 | 1.989 | Predicted | splice site |
| Splice_367 | 344148 | 344149 | 2.043 | Predicted | splice site |
| Splice_368 | 345009 | 345010 | 1.849 | Predicted | splice site |
| Splice_369 | 346088 | 346089 | 1.742 | Predicted | splice site |
| Splice_370 | 346220 | 346221 | 2.141 | Predicted | splice site |
| Splice_371 | 346417 | 346418 | 1.637 | Predicted | splice site |
| Splice_372 | 349789 | 349790 | 1.797 | Predicted | splice site |
| Splice_373 | 351132 | 351133 | 2.288 | Predicted | splice site |
| Splice_374 | 351301 | 351302 | 2.239 | Predicted | splice site |
| Splice_375 | 352378 | 352379 | 1.713 | Predicted | splice site |
| Splice_376 | 354231 | 354232 | 1.698 | Predicted | splice site |
| Splice_377 | 355238 | 355239 | 1.621 | Predicted | splice site |
| Splice_378 | 355412 | 355413 | 1.683 | Predicted | splice site |
| Splice_379 | 355616 | 355617 | 1.621 | Predicted | splice site |
| Splice_380 | 358328 | 358329 | 1.849 | Predicted | splice site |
| Splice_381 | 358701 | 358702 | 1.683 | Predicted | splice site |
| Splice_382 | 360733 | 360734 | 1.621 | Predicted | splice site |
| Splice_383 | 360848 | 360849 | 2.230 | Predicted | splice site |
| Splice_384 | 363760 | 363761 | 1.501 | Predicted | splice site |
| Splice_385 | 364549 | 364550 | 1.742 | Predicted | splice site |
| Splice_386 | 370518 | 370519 | 1.683 | Predicted | splice site |
| Splice_387 | 373642 | 373643 | 1.572 | Predicted | splice site |
| Splice_388 | 374233 | 374234 | 1.728 | Predicted | splice site |
| Splice_389 | 374906 | 374907 | 1.874 | Predicted | splice site |
| Splice_390 | 376674 | 376675 | 1.588 | Predicted | splice site |

|             |        |        |       |                       |                  |
|-------------|--------|--------|-------|-----------------------|------------------|
| Splice_391  | 377152 | 377153 | 1.797 | Predicted             | splice site      |
| Splice_392  | 379003 | 379004 | 1.910 | Predicted             | splice site      |
| Splice_393  | 379751 | 379752 | 1.537 | Predicted             | splice site      |
| Splice_394  | 380037 | 380038 | 1.653 | Predicted             | splice site      |
| Splice_395  | 380201 | 380202 | 2.053 | Predicted             | splice site      |
| lmaj_03_001 | 380342 | 383353 | 0     | hypothetical protein, | unknown function |
| Splice_396  | 380347 | 380348 | 1.885 | Predicted             | splice site      |
| Splice_397  | 380444 | 380445 | 1.945 | Predicted             | splice site      |
| Splice_398  | 380582 | 380583 | 1.637 | Predicted             | splice site      |
| Splice_399  | 380780 | 380781 | 1.537 | Predicted             | splice site      |
| Splice_400  | 382086 | 382087 | 1.668 | Predicted             | splice site      |
| Splice_401  | 382224 | 382225 | 1.668 | Predicted             | splice site      |
| Splice_402  | 382500 | 382501 | 1.520 | Predicted             | splice site      |
| Splice_403  | 383494 | 383495 | 2.053 | Predicted             | splice site      |
| Splice_404  | 383569 | 383570 | 1.588 | Predicted             | splice site      |
| Splice_405  | 383652 | 383653 | 1.898 | Predicted             | splice site      |
| Splice_406  | 383836 | 383837 | 2.001 | Predicted             | splice site      |
| Splice_407  | 383943 | 383944 | 1.572 | Predicted             | splice site      |
| Splice_408  | 384018 | 384019 | 1.835 | Predicted             | splice site      |
| Splice_409  | 384251 | 384252 | 1.922 | Predicted             | splice site      |
| Splice_410  | 384395 | 384396 | 1.554 | Predicted             | splice site      |
